# Supplementary material for: Comprehensive Expression Profiling and Functional Network Analysis of Porphyra-334, One Mycosporine-Like Amino Acid (MAA), in Human Keratinocyte Exposed with UV-radiation
Source: MDPI journal article supplement (doi:10.3390/md15070196), 2017-06-24
Supplement: s1 [file s1]

## **Legends of supplementary figures**

**Supplementary figure 1.** A chemical structure of porphyra-334

**Supplementary figure 2.** Relative expression levels of highly up- or downregulated genes in Porphyra-334-modulated differentially expressed genes (DEGs) by quantitative RT-PCR

**Supplementary figure3.** Relative expression levels of p53 mRNAs (A) and porphyra-334-responsive miRNAs (B) by quantitative RT-PCR
