# Supplementary material for: Comprehensive Expression Profiling and Functional Network Analysis of Porphyra-334, One Mycosporine-Like Amino Acid (MAA), in Human Keratinocyte Exposed with UV-radiation
Source: Mar Drugs. 2017 Jun 24;15(7):196. doi: 10.3390/md15070196 (PMC5532638; doi:10.3390/md15070196)
Supplement: Supplementary file 1 [file marinedrugs-15-00196-s001.zip]

Archive with 9 entries (9 files):
- Supplementary Figure 3.tif
- Supplementary Table S1.xlsx
- Supplementary Table S2.xlsx
- Supplementary Table S3.xlsx
- Supplementary Table S4.xlsx
- Supplementary Table S5.xlsx
- Supplementary Materials.pdf
- Supplementary Figure 1.tif
- Supplementary Figure 2.tif
