# Supplementary material for: Comprehensive Expression Profiling and Functional Network Analysis of Porphyra-334, One Mycosporine-Like Amino Acid (MAA), in Human Keratinocyte Exposed with UV-radiation
Source: Mar Drugs. 2017 Jun 24;15(7):196. doi: 10.3390/md15070196 (PMC5532638; doi:10.3390/md15070196)
Supplement: Supplementary file 1 [file marinedrugs-15-00196-s001.zip › Supplementary Table S1.xlsx]

## Sheet: GO analysis
Category	Term	Count	%	PValue	Genes	List Total	Pop Hits	Pop Total	Fold Enrichment	Bonferroni	Benjamini	FDR
GOTERM_BP_FAT	GO:0016337~cell-cell adhesion	14	6.82927	1.91362e-06	PCDHA6, CLDN9, PCDHA9, CLDN19, CLDN4, CLDN6, PCDH10, PCDHA1, CDH6, NCAM1, ANXA9, CTGF, CYFIP2, PCDHA10	128	276	13528	5.36096	0.00247507	0.00247507	0.00312296
GOTERM_BP_FAT	GO:0006357~regulation of transcription from RNA polymerase II promoter	18	8.78049	0.000446981	EGR1, CEBPA, EGR2, MAFB, ANKRD1, PAX3, FOSB, IL11, CDKN1C, DLX2, NPAS1, ID2, JUN, HOXB9, GFI1, NFATC2, NKX2-5, SRCAP	128	727	13528	2.61675	0.439525	0.251351	0.726978
GOTERM_BP_FAT	GO:0007155~cell adhesion	17	8.29268	0.000848519	PCDHA6, CLDN9, PCDHA9, CLDN19, CLDN4, NRXN3, CLDN6, PCDH10, PCDHA1, CDH6, NCAM1, ANXA9, CTGF, CYFIP2, PCDHA10, RHOB, CD226	128	700	13528	2.5667	0.666896	0.306797	1.37581
GOTERM_BP_FAT	GO:0022610~biological adhesion	17	8.29268	0.000861481	PCDHA6, CLDN9, PCDHA9, CLDN19, CLDN4, NRXN3, CLDN6, PCDH10, PCDHA1, CDH6, NCAM1, ANXA9, CTGF, CYFIP2, PCDHA10, RHOB, CD226	128	701	13528	2.56303	0.672445	0.243479	1.39669
GOTERM_BP_FAT	GO:0000122~negative regulation of transcription from RNA polymerase II promoter	10	4.87805	0.000902652	CDKN1C, EGR1, CEBPA, DLX2, NPAS1, ID2, GFI1, PAX3, FOSB, NKX2-5	128	266	13528	3.97321	0.689466	0.208553	1.46298
GOTERM_BP_FAT	GO:0016338~calcium-independent cell-cell adhesion	4	1.95122	0.00109213	CLDN19, CLDN9, CLDN4, CLDN6	128	22	13528	19.2159	0.757094	0.210099	1.76752
GOTERM_BP_FAT	GO:0032355~response to estradiol stimulus	5	2.43902	0.00163008	PTGS2, DUSP1, SOCS3, SOCS1, NKX2-5	128	54	13528	9.78588	0.879087	0.260523	2.62733
GOTERM_BP_FAT	GO:0045892~negative regulation of transcription, DNA-dependent	11	5.36585	0.00192173	CDKN1C, EGR1, CEBPA, DLX2, NPAS1, ID2, GFI1, PAX3, FOSB, RASD1, NKX2-5	128	356	13528	3.26562	0.917175	0.267564	3.0905
GOTERM_BP_FAT	GO:0051253~negative regulation of RNA metabolic process	11	5.36585	0.00217142	CDKN1C, EGR1, CEBPA, DLX2, NPAS1, ID2, GFI1, PAX3, FOSB, RASD1, NKX2-5	128	362	13528	3.2115	0.940098	0.268591	3.4854
GOTERM_BP_FAT	GO:0021772~olfactory bulb development	3	1.46341	0.00235951	ARX, DLX2, EFNA2	128	8	13528	39.6328	0.953074	0.263553	3.78189
GOTERM_BP_FAT	GO:0045944~positive regulation of transcription from RNA polymerase II promoter	11	5.36585	0.00259447	EGR1, CEBPA, DLX2, EGR2, MAFB, JUN, HOXB9, PAX3, NFATC2, NKX2-5, IL11	128	371	13528	3.13359	0.965411	0.263493	4.15105
GOTERM_BP_FAT	GO:0009890~negative regulation of biosynthetic process	14	6.82927	0.00281814	CEBPA, EGR1, PAX3, FOSB, CDKN1C, NPAS1, DLX2, ID2, APOE, HBEGF, GFI1, NKX2-5, RASD1, IGFBP5	128	573	13528	2.58224	0.974129	0.262548	4.50123
GOTERM_BP_FAT	GO:0042127~regulation of cell proliferation	17	8.29268	0.00282684	OPRM1, CEBPA, PTGS2, MARCKSL1, PAX3, IL11, ARX, CDKN1C, SSTR2, TNFRSF11A, ID2, APOE, JUN, HBEGF, NKX2-5, SERTAD1, IGFBP5	128	787	13528	2.28296	0.97442	0.245723	4.51482
GOTERM_BP_FAT	GO:0021988~olfactory lobe development	3	1.46341	0.00301505	ARX, DLX2, EFNA2	128	9	13528	35.2292	0.979967	0.243697	4.80852
GOTERM_BP_FAT	GO:0048167~regulation of synaptic plasticity	5	2.43902	0.00304751	EGR1, S100P, EGR2, PTGS2, APOE	128	64	13528	8.25684	0.980794	0.231645	4.85908
GOTERM_BP_FAT	GO:0007611~learning or memory	6	2.92683	0.00390834	EGR1, S100P, EGR2, PTGS2, JUN, PARK2	128	111	13528	5.71284	0.993725	0.271633	6.19094
GOTERM_BP_FAT	GO:0048168~regulation of neuronal synaptic plasticity	4	1.95122	0.00460197	EGR1, S100P, EGR2, APOE	128	36	13528	11.7431	0.997454	0.296277	7.25136
GOTERM_BP_FAT	GO:0010558~negative regulation of macromolecule biosynthetic process	13	6.34146	0.00532444	CEBPA, EGR1, PAX3, FOSB, CDKN1C, NPAS1, DLX2, ID2, HBEGF, GFI1, NKX2-5, RASD1, IGFBP5	128	547	13528	2.51177	0.999006	0.318928	8.3439
GOTERM_BP_FAT	GO:0045935~positive regulation of nucleobase, nucleoside, nucleotide and nucleic acid metabolic process	14	6.82927	0.00576775	CEBPA, EGR1, EGR2, MAFB, ABCA1, PAX3, IL11, DLX2, APOE, JUN, HOXB9, NFATC2, NKX2-5, SERTAD1	128	624	13528	2.37119	0.999442	0.325818	9.00829
GOTERM_BP_FAT	GO:0032496~response to lipopolysaccharide	5	2.43902	0.00591274	TG, PTGS2, SOCS3, JUN, SOCS1	128	77	13528	6.86282	0.999538	0.318859	9.2246
GOTERM_BP_FAT	GO:0031327~negative regulation of cellular biosynthetic process	13	6.34146	0.00647641	CEBPA, EGR1, PAX3, FOSB, CDKN1C, NPAS1, DLX2, ID2, HBEGF, GFI1, NKX2-5, RASD1, IGFBP5	128	561	13528	2.44909	0.999778	0.330134	10.061
GOTERM_BP_FAT	GO:0051173~positive regulation of nitrogen compound metabolic process	14	6.82927	0.00744983	CEBPA, EGR1, EGR2, MAFB, ABCA1, PAX3, IL11, DLX2, APOE, JUN, HOXB9, NFATC2, NKX2-5, SERTAD1	128	644	13528	2.29755	0.999938	0.35607	11.4883
GOTERM_BP_FAT	GO:0010033~response to organic substance	15	7.31707	0.00769628	TG, EGR1, EGR2, PTGS2, SOCS3, SLC9A3, SOCS1, PMAIP1, DUSP1, ID2, APOE, JUN, HSPA6, RYR1, NKX2-5	128	721	13528	2.19877	0.999955	0.352742	11.8463
GOTERM_BP_FAT	GO:0007156~homophilic cell adhesion	6	2.92683	0.00782812	PCDHA6, PCDHA9, PCDH10, PCDHA10, PCDHA1, CDH6	128	131	13528	4.84065	0.999962	0.345612	12.0373
GOTERM_BP_FAT	GO:0030182~neuron differentiation	11	5.36585	0.00822689	ARX, CDKN1C, DLX2, RND1, EGR2, TUBB2B, NRXN3, EFNA2, MDGA2, GFI1, PAX3	128	438	13528	2.65425	0.999977	0.348134	12.6125
GOTERM_BP_FAT	GO:0010628~positive regulation of gene expression	13	6.34146	0.00845625	EGR1, CEBPA, DLX2, EGR2, MAFB, JUN, HOXB9, PAX3, POU3F1, NFATC2, NKX2-5, SERTAD1, IL11	128	581	13528	2.36478	0.999983	0.344906	12.9417
GOTERM_BP_FAT	GO:0044057~regulation of system process	9	4.39024	0.00869122	EGR1, SSTR2, S100P, EGR2, PTGS2, APOE, HBEGF, PARK2, NKX2-5	128	309	13528	3.07828	0.999988	0.342084	13.2778
GOTERM_BP_FAT	GO:0002237~response to molecule of bacterial origin	5	2.43902	0.00869982	TG, PTGS2, SOCS3, JUN, SOCS1	128	86	13528	6.14462	0.999988	0.332441	13.2901
GOTERM_BP_FAT	GO:0010605~negative regulation of macromolecule metabolic process	15	7.31707	0.00893714	CEBPA, EGR1, SOCS1, PAX3, FOSB, CDKN1C, NPAS1, DLX2, ID2, JUN, HBEGF, GFI1, NKX2-5, RASD1, IGFBP5	128	734	13528	2.15983	0.999991	0.330272	13.6282
GOTERM_BP_FAT	GO:0050804~regulation of synaptic transmission	6	2.92683	0.00912502	EGR1, S100P, EGR2, PTGS2, APOE, PARK2	128	136	13528	4.66268	0.999993	0.326795	13.895
GOTERM_BP_FAT	GO:0048660~regulation of smooth muscle cell proliferation	4	1.95122	0.0091416	PTGS2, JUN, HBEGF, IGFBP5	128	46	13528	9.19022	0.999993	0.318623	13.9186
GOTERM_BP_FAT	GO:0009617~response to bacterium	7	3.41463	0.00970918	TG, PTGS2, HIST2H2BE, SOCS3, RNASE7, JUN, SOCS1	128	193	13528	3.83323	0.999997	0.326211	14.7198
GOTERM_BP_FAT	GO:0007267~cell-cell signaling	13	6.34146	0.0107504	SSTR2, EGR3, TNFRSF11A, NRXN3, APOE, EFNA2, STC1, RAPGEF4, FGF12, PARK2, GDF15, HAP1, IL11	128	600	13528	2.2899	0.999999	0.345679	16.1714
GOTERM_BP_FAT	GO:0016481~negative regulation of transcription	11	5.36585	0.0112045	CDKN1C, EGR1, CEBPA, DLX2, NPAS1, ID2, GFI1, PAX3, FOSB, RASD1, NKX2-5	128	459	13528	2.53282	1	0.348949	16.7971
GOTERM_BP_FAT	GO:0031328~positive regulation of cellular biosynthetic process	14	6.82927	0.0121082	CEBPA, EGR1, EGR2, MAFB, ABCA1, PAX3, IL11, DLX2, APOE, JUN, HOXB9, NFATC2, NKX2-5, SERTAD1	128	685	13528	2.16004	1	0.362842	18.0295
GOTERM_BP_FAT	GO:0042325~regulation of phosphorylation	11	5.36585	0.0123601	CDKN1C, DUSP19, PPP1R14D, SOCS3, APOE, JUN, RGS4, SOCS1, RAPGEF4, SERTAD1, IL11	128	466	13528	2.49477	1	0.360707	18.37
GOTERM_BP_FAT	GO:0051969~regulation of transmission of nerve impulse	6	2.92683	0.0124856	EGR1, S100P, EGR2, PTGS2, APOE, PARK2	128	147	13528	4.31378	1	0.3558	18.5391
GOTERM_BP_FAT	GO:0007610~behavior	11	5.36585	0.0128822	OPRM1, EGR1, NPAS1, SCN1A, S100P, EGR2, PTGS2, JUN, GFI1, PARK2, FOSB	128	469	13528	2.47881	1	0.357163	19.0714
GOTERM_BP_FAT	GO:0006916~anti-apoptosis	7	3.41463	0.0130859	PAK7, IER3, SERPINB9, SOCS3, APOE, PIM2, NKX2-5	128	206	13528	3.59132	1	0.354278	19.3435
GOTERM_BP_FAT	GO:0044092~negative regulation of molecular function	9	4.39024	0.0134498	OPRM1, CDKN1C, SSTR2, DUSP19, ID2, APOE, RGS4, GFI1, ANGPTL4	128	334	13528	2.84787	1	0.354927	19.8274
GOTERM_BP_FAT	GO:0009891~positive regulation of biosynthetic process	14	6.82927	0.0135308	CEBPA, EGR1, EGR2, MAFB, ABCA1, PAX3, IL11, DLX2, APOE, JUN, HOXB9, NFATC2, NKX2-5, SERTAD1	128	695	13528	2.12896	1	0.349681	19.9348
GOTERM_BP_FAT	GO:0045893~positive regulation of transcription, DNA-dependent	11	5.36585	0.0143559	EGR1, CEBPA, DLX2, EGR2, MAFB, JUN, HOXB9, PAX3, NFATC2, NKX2-5, IL11	128	477	13528	2.43724	1	0.359719	21.0208
GOTERM_BP_FAT	GO:0031644~regulation of neurological system process	6	2.92683	0.0146326	EGR1, S100P, EGR2, PTGS2, APOE, PARK2	128	153	13528	4.14461	1	0.358492	21.3818
GOTERM_BP_FAT	GO:0051254~positive regulation of RNA metabolic process	11	5.36585	0.0151386	EGR1, CEBPA, DLX2, EGR2, MAFB, JUN, HOXB9, PAX3, NFATC2, NKX2-5, IL11	128	481	13528	2.41697	1	0.361711	22.0381
GOTERM_BP_FAT	GO:0043086~negative regulation of catalytic activity	8	3.90244	0.0155926	OPRM1, CDKN1C, SSTR2, DUSP19, APOE, RGS4, GFI1, ANGPTL4	128	277	13528	3.05235	1	0.363808	22.6225
GOTERM_BP_FAT	GO:0051094~positive regulation of developmental process	8	3.90244	0.0158741	ID2, SOCS3, ADAMTS20, JUN, RHOB, GFI1, NKX2-5, ANGPTL4	128	278	13528	3.04137	1	0.362676	22.9829
GOTERM_BP_FAT	GO:0051174~regulation of phosphorus metabolic process	11	5.36585	0.0159529	CDKN1C, DUSP19, PPP1R14D, SOCS3, APOE, JUN, RGS4, SOCS1, RAPGEF4, SERTAD1, IL11	128	485	13528	2.39704	1	0.357955	23.0834
GOTERM_BP_FAT	GO:0019220~regulation of phosphate metabolic process	11	5.36585	0.0159529	CDKN1C, DUSP19, PPP1R14D, SOCS3, APOE, JUN, RGS4, SOCS1, RAPGEF4, SERTAD1, IL11	128	485	13528	2.39704	1	0.357955	23.0834
GOTERM_BP_FAT	GO:0008284~positive regulation of cell proliferation	10	4.87805	0.0160385	TNFRSF11A, ID2, PTGS2, MARCKSL1, JUN, HBEGF, PAX3, NKX2-5, SERTAD1, IL11	128	414	13528	2.55284	1	0.35352	23.1926
GOTERM_BP_FAT	GO:0045941~positive regulation of transcription	12	5.85366	0.0170573	EGR1, CEBPA, DLX2, EGR2, MAFB, JUN, HOXB9, PAX3, NFATC2, NKX2-5, SERTAD1, IL11	128	564	13528	2.24867	1	0.365355	24.4803
GOTERM_BP_FAT	GO:0043627~response to estrogen stimulus	5	2.43902	0.0171051	PTGS2, DUSP1, SOCS3, SOCS1, NKX2-5	128	105	13528	5.03274	1	0.360364	24.5401
GOTERM_BP_FAT	GO:0019226~transmission of nerve impulse	9	4.39024	0.0173597	SCN1A, EGR3, CLDN19, EGR2, NRXN3, APOE, POU3F1, PARK2, HAP1	128	350	13528	2.71768	1	0.358965	24.8585
GOTERM_BP_FAT	GO:0043066~negative regulation of apoptosis	9	4.39024	0.0184534	PAK7, IER3, SERPINB9, SOCS3, ADAMTS20, APOE, PIM2, NKX2-5, ANGPTL4	128	354	13528	2.68697	1	0.371145	26.2118
GOTERM_BP_FAT	GO:0043069~negative regulation of programmed cell death	9	4.39024	0.0198892	PAK7, IER3, SERPINB9, SOCS3, ADAMTS20, APOE, PIM2, NKX2-5, ANGPTL4	128	359	13528	2.64955	1	0.387907	27.9538
GOTERM_BP_FAT	GO:0060548~negative regulation of cell death	9	4.39024	0.0201857	PAK7, IER3, SERPINB9, SOCS3, ADAMTS20, APOE, PIM2, NKX2-5, ANGPTL4	128	360	13528	2.64219	1	0.386783	28.3086
GOTERM_BP_FAT	GO:0010629~negative regulation of gene expression	11	5.36585	0.0202738	CDKN1C, EGR1, CEBPA, DLX2, NPAS1, ID2, GFI1, PAX3, FOSB, RASD1, NKX2-5	128	504	13528	2.30667	1	0.382614	28.4137
GOTERM_BP_FAT	GO:0006512~ubiquitin cycle	3	1.46341	0.0210889	SOCS3, SOCS1, PARK2	128	24	13528	13.2109	1	0.389145	29.3795
GOTERM_BP_FAT	GO:0045934~negative regulation of nucleobase, nucleoside, nucleotide and nucleic acid metabolic process	11	5.36585	0.0223295	CDKN1C, EGR1, CEBPA, DLX2, NPAS1, ID2, GFI1, PAX3, FOSB, RASD1, NKX2-5	128	512	13528	2.27063	1	0.40134	30.8261
GOTERM_BP_FAT	GO:0001503~ossification	5	2.43902	0.0230448	TNFRSF11A, PTGS2, CTGF, STC1, IGFBP5	128	115	13528	4.59511	1	0.40581	31.6474
GOTERM_BP_FAT	GO:0051172~negative regulation of nitrogen compound metabolic process	11	5.36585	0.0242498	CDKN1C, EGR1, CEBPA, DLX2, NPAS1, ID2, GFI1, PAX3, FOSB, RASD1, NKX2-5	128	519	13528	2.24	1	0.416565	33.0104
GOTERM_BP_FAT	GO:0035283~central nervous system segmentation	2	0.97561	0.0279023	EGR2, MAFB	128	3	13528	70.4583	1	0.457076	36.9875
GOTERM_BP_FAT	GO:0035284~brain segmentation	2	0.97561	0.0279023	EGR2, MAFB	128	3	13528	70.4583	1	0.457076	36.9875
GOTERM_BP_FAT	GO:0060348~bone development	5	2.43902	0.0285985	TNFRSF11A, PTGS2, CTGF, STC1, IGFBP5	128	123	13528	4.29624	1	0.45989	37.72
GOTERM_BP_FAT	GO:0050877~neurological system process	19	9.26829	0.0336101	OPRM1, EGR1, EGR3, SCN1A, S100P, EGR2, CLDN19, PTGS2, NRXN3, TMIE, TIMM10, PARK2, PAX3, OR9Q1, APOE, JUN, POU3F1, TAS2R30, HAP1	128	1210	13528	1.65956	1	0.51036	42.7615
GOTERM_BP_FAT	GO:0048661~positive regulation of smooth muscle cell proliferation	3	1.46341	0.034053	PTGS2, JUN, HBEGF	128	31	13528	10.2278	1	0.509423	43.1881
GOTERM_BP_FAT	GO:0008637~apoptotic mitochondrial changes	3	1.46341	0.034053	JUN, PIM2, PMAIP1	128	31	13528	10.2278	1	0.509423	43.1881
GOTERM_BP_FAT	GO:0019935~cyclic-nucleotide-mediated signaling	5	2.43902	0.034058	OPRM1, SSTR2, PTGER4, APOE, RAPGEF4	128	130	13528	4.0649	1	0.503986	43.193
GOTERM_BP_FAT	GO:0048545~response to steroid hormone stimulus	6	2.92683	0.0347106	PTGS2, DUSP1, SOCS3, SLC9A3, SOCS1, NKX2-5	128	192	13528	3.30273	1	0.505313	43.8161
GOTERM_BP_FAT	GO:0048534~hemopoietic or lymphoid organ development	7	3.41463	0.0358895	EGR1, CEBPA, TNFRSF11A, ID2, NKX2-5, ADD2, IL11	128	260	13528	2.84543	1	0.511855	44.9255
GOTERM_BP_FAT	GO:0032488~Cdc42 protein signal transduction	2	0.97561	0.0370303	APOE, ABCA1	128	4	13528	52.8437	1	0.517765	45.9794
GOTERM_BP_FAT	GO:0021571~rhombomere 5 development	2	0.97561	0.0370303	EGR2, MAFB	128	4	13528	52.8437	1	0.517765	45.9794
GOTERM_BP_FAT	GO:0032583~regulation of gene-specific transcription	5	2.43902	0.0374322	CDKN1C, CEBPA, DLX2, GFI1, NKX2-5	128	134	13528	3.94356	1	0.516424	46.3462
GOTERM_BP_FAT	GO:0031667~response to nutrient levels	6	2.92683	0.0381141	SSTR2, PTGS2, DUSP1, SOCS3, JUN, STC1	128	197	13528	3.21891	1	0.517762	46.9631
GOTERM_BP_FAT	GO:0034097~response to cytokine stimulus	4	1.95122	0.0381442	PTGS2, SOCS3, JUN, SOCS1	128	79	13528	5.35127	1	0.512994	46.9902
GOTERM_BP_FAT	GO:0007005~mitochondrion organization	5	2.43902	0.0409924	CEBPA, JUN, TIMM10, PIM2, PMAIP1	128	138	13528	3.82926	1	0.533937	49.4947
GOTERM_BP_FAT	GO:0040008~regulation of growth	8	3.90244	0.0417489	ARX, SOCS3, CTGF, APOE, SOCS1, HBEGF, SERTAD1, IGFBP5	128	341	13528	2.47947	1	0.535608	50.141
GOTERM_BP_FAT	GO:0010557~positive regulation of macromolecule biosynthetic process	12	5.85366	0.0436039	EGR1, CEBPA, DLX2, EGR2, MAFB, JUN, HOXB9, PAX3, NFATC2, NKX2-5, SERTAD1, IL11	128	654	13528	1.93922	1	0.54656	51.693
GOTERM_BP_FAT	GO:0043407~negative regulation of MAP kinase activity	3	1.46341	0.0447642	DUSP19, APOE, RGS4	128	36	13528	8.80729	1	0.551321	52.6406
GOTERM_BP_FAT	GO:0007422~peripheral nervous system development	3	1.46341	0.0447642	EGR3, EGR2, POU3F1	128	36	13528	8.80729	1	0.551321	52.6406
GOTERM_BP_FAT	GO:0002520~immune system development	7	3.41463	0.0457607	EGR1, CEBPA, TNFRSF11A, ID2, NKX2-5, ADD2, IL11	128	276	13528	2.68048	1	0.554601	53.4405
GOTERM_BP_FAT	GO:0007242~intracellular signaling cascade	19	9.26829	0.0458503	OPRM1, PTGER4, SOCS3, SOCS1, RUNDC3A, ABCA1, DUSP19, SSTR2, RND1, PLCB4, DUSP1, CTGF, APOE, RGS4, RHOB, RAPGEF4, TXK, RASD1, IGFBP5	128	1256	13528	1.59878	1	0.550555	53.5118
GOTERM_BP_FAT	GO:0034380~high-density lipoprotein particle assembly	2	0.97561	0.0460733	APOE, ABCA1	128	5	13528	42.275	1	0.547644	53.6887
GOTERM_BP_FAT	GO:0019227~neuronal action potential propagation	2	0.97561	0.0460733	SCN1A, CLDN19	128	5	13528	42.275	1	0.547644	53.6887
GOTERM_BP_FAT	GO:0007517~muscle organ development	6	2.92683	0.0487032	EGR3, HBEGF, MKX, PAX3, NKX2-5, IGFBP5	128	211	13528	3.00533	1	0.563494	55.729
GOTERM_BP_FAT	GO:0048514~blood vessel morphogenesis	6	2.92683	0.0487032	CTGF, APOE, JUN, RHOB, NKX2-5, ANGPTL4	128	211	13528	3.00533	1	0.563494	55.729
GOTERM_BP_FAT	GO:0007266~Rho protein signal transduction	3	1.46341	0.0493531	APOE, RHOB, ABCA1	128	38	13528	8.34375	1	0.563803	56.22
GOTERM_BP_FAT	GO:0033673~negative regulation of kinase activity	4	1.95122	0.0526669	CDKN1C, DUSP19, APOE, RGS4	128	90	13528	4.69722	1	0.583478	58.6452
GOTERM_BP_FAT	GO:0008285~negative regulation of cell proliferation	8	3.90244	0.0537099	OPRM1, CDKN1C, CEBPA, SSTR2, PTGS2, APOE, JUN, IGFBP5	128	361	13528	2.34211	1	0.5863	59.382
GOTERM_BP_FAT	GO:0009991~response to extracellular stimulus	6	2.92683	0.0563444	SSTR2, PTGS2, DUSP1, SOCS3, JUN, STC1	128	220	13528	2.88239	1	0.599836	61.1887
GOTERM_BP_FAT	GO:0010551~regulation of specific transcription from RNA polymerase II promoter	4	1.95122	0.0585198	CEBPA, DLX2, GFI1, NKX2-5	128	94	13528	4.49734	1	0.609706	62.6233
GOTERM_BP_FAT	GO:0010604~positive regulation of macromolecule metabolic process	14	6.82927	0.0588159	EGR1, CEBPA, DLX2, EGR2, APOE, MAFB, JUN, HOXB9, PAX3, POU3F1, NFATC2, NKX2-5, SERTAD1, IL11	128	857	13528	1.72652	1	0.60722	62.8147
GOTERM_BP_FAT	GO:0019933~cAMP-mediated signaling	4	1.95122	0.0600292	OPRM1, SSTR2, PTGER4, RAPGEF4	128	95	13528	4.45	1	0.610606	63.5893
GOTERM_BP_FAT	GO:0051348~negative regulation of transferase activity	4	1.95122	0.0615568	CDKN1C, DUSP19, APOE, RGS4	128	96	13528	4.40365	1	0.615837	64.5431
GOTERM_BP_FAT	GO:0021546~rhombomere development	2	0.97561	0.0639072	EGR2, MAFB	128	7	13528	30.1964	1	0.62582	65.9649
GOTERM_BP_FAT	GO:0021892~cerebral cortex GABAergic interneuron differentiation	2	0.97561	0.0639072	ARX, DLX2	128	7	13528	30.1964	1	0.62582	65.9649
GOTERM_BP_FAT	GO:0045597~positive regulation of cell differentiation	6	2.92683	0.0646406	ID2, SOCS3, ADAMTS20, JUN, GFI1, NKX2-5	128	229	13528	2.7691	1	0.625956	66.3975
GOTERM_BP_FAT	GO:0006355~regulation of transcription, DNA-dependent	24	11.7073	0.0654784	EGR1, CEBPA, TSHZ2, EGR2, MAFB, FOSB, ANKRD1, PAX3, IL11, ARX, CDKN1C, DLX2, NPAS1, ID2, JUN, MKX, HOXB9, ZNF599, GFI1, POU3F1, NFATC2, NKX2-5, RASD1, SRCAP	128	1773	13528	1.43063	1	0.6267	66.8853
GOTERM_BP_FAT	GO:0042326~negative regulation of phosphorylation	3	1.46341	0.0666425	CDKN1C, JUN, SOCS1	128	45	13528	7.04583	1	0.629299	67.5522
GOTERM_BP_FAT	GO:0007264~small GTPase mediated signal transduction	7	3.41463	0.0676196	RND1, APOE, RUNDC3A, RHOB, RAPGEF4, ABCA1, RASD1	128	305	13528	2.42561	1	0.630779	68.1021
GOTERM_BP_FAT	GO:0001816~cytokine production	3	1.46341	0.0692562	ABCA1, NFATC2, CD226	128	46	13528	6.89266	1	0.635875	69.0037
GOTERM_BP_FAT	GO:0007623~circadian rhythm	3	1.46341	0.0692562	EGR3, JUN, SLC9A3	128	46	13528	6.89266	1	0.635875	69.0037
GOTERM_BP_FAT	GO:0021700~developmental maturation	4	1.95122	0.0694638	CDKN1C, CEBPA, RND1, PTGS2	128	101	13528	4.18564	1	0.63304	69.1163
GOTERM_BP_FAT	GO:0030097~hemopoiesis	6	2.92683	0.0715443	EGR1, CEBPA, ID2, NKX2-5, ADD2, IL11	128	236	13528	2.68697	1	0.640368	70.2241
GOTERM_BP_FAT	GO:0010894~negative regulation of steroid biosynthetic process	2	0.97561	0.0726997	APOE, GFI1	128	8	13528	26.4219	1	0.642594	70.8231
GOTERM_BP_FAT	GO:0045939~negative regulation of steroid metabolic process	2	0.97561	0.0726997	APOE, GFI1	128	8	13528	26.4219	1	0.642594	70.8231
GOTERM_BP_FAT	GO:0045936~negative regulation of phosphate metabolic process	3	1.46341	0.0745826	CDKN1C, JUN, SOCS1	128	48	13528	6.60547	1	0.648513	71.7751
GOTERM_BP_FAT	GO:0010563~negative regulation of phosphorus metabolic process	3	1.46341	0.0745826	CDKN1C, JUN, SOCS1	128	48	13528	6.60547	1	0.648513	71.7751
GOTERM_BP_FAT	GO:0042981~regulation of apoptosis	13	6.34146	0.07481	IER3, PTGS2, ADAMTS20, SOCS3, PMAIP1, PIM2, SERPINB9, PAK7, DUSP1, APOE, JUN, NKX2-5, ANGPTL4	128	804	13528	1.70888	1	0.645868	71.8881
GOTERM_BP_FAT	GO:0032268~regulation of cellular protein metabolic process	9	4.39024	0.0779138	DIO2, SOCS3, APOE, JUN, SOCS1, RAPGEF4, CPEB1, IL11, IGFBP5	128	474	13528	2.00672	1	0.657641	73.3882
GOTERM_BP_FAT	GO:0006928~cell motion	9	4.39024	0.0786511	ARX, S100P, EGR2, PTGS2, NRXN3, CTGF, EFNA2, HBEGF, PAX3	128	475	13528	2.0025	1	0.657517	73.7334
GOTERM_BP_FAT	GO:0048568~embryonic organ development	5	2.43902	0.0786989	CEBPA, DLX2, MAFB, TMIE, GFI1	128	172	13528	3.07231	1	0.65406	73.7556
GOTERM_BP_FAT	GO:0043067~regulation of programmed cell death	13	6.34146	0.0792173	IER3, PTGS2, ADAMTS20, SOCS3, PMAIP1, PIM2, SERPINB9, PAK7, DUSP1, APOE, JUN, NKX2-5, ANGPTL4	128	812	13528	1.69204	1	0.652919	73.9956
GOTERM_BP_FAT	GO:0007411~axon guidance	4	1.95122	0.0795257	ARX, EGR2, NRXN3, EFNA2	128	107	13528	3.95093	1	0.650788	74.1374
GOTERM_BP_FAT	GO:0051252~regulation of RNA metabolic process	24	11.7073	0.0797338	EGR1, CEBPA, TSHZ2, EGR2, MAFB, FOSB, ANKRD1, PAX3, IL11, ARX, CDKN1C, DLX2, NPAS1, ID2, JUN, MKX, HOXB9, ZNF599, GFI1, POU3F1, NFATC2, NKX2-5, RASD1, SRCAP	128	1813	13528	1.39906	1	0.648204	74.2326
GOTERM_BP_FAT	GO:0001932~regulation of protein amino acid phosphorylation	5	2.43902	0.0800044	SOCS3, JUN, SOCS1, RAPGEF4, IL11	128	173	13528	3.05455	1	0.645951	74.356
GOTERM_BP_FAT	GO:0001501~skeletal system development	7	3.41463	0.08003	DLX2, TNFRSF11A, PTGS2, CTGF, STC1, HOXB9, IGFBP5	128	319	13528	2.31916	1	0.642555	74.3676
GOTERM_BP_FAT	GO:0010941~regulation of cell death	13	6.34146	0.0809122	IER3, PTGS2, ADAMTS20, SOCS3, PMAIP1, PIM2, SERPINB9, PAK7, DUSP1, APOE, JUN, NKX2-5, ANGPTL4	128	815	13528	1.68581	1	0.643275	74.7658
GOTERM_BP_FAT	GO:0001568~blood vessel development	6	2.92683	0.0809947	CTGF, APOE, JUN, RHOB, NKX2-5, ANGPTL4	128	245	13528	2.58827	1	0.640213	74.8028
GOTERM_BP_FAT	GO:0014037~Schwann cell differentiation	2	0.97561	0.0814103	EGR2, POU3F1	128	9	13528	23.4861	1	0.638756	74.9881
GOTERM_BP_FAT	GO:0030808~regulation of nucleotide biosynthetic process	4	1.95122	0.0847822	OPRM1, SSTR2, APOE, ABCA1	128	110	13528	3.84318	1	0.650954	76.4451
GOTERM_BP_FAT	GO:0030802~regulation of cyclic nucleotide biosynthetic process	4	1.95122	0.0847822	OPRM1, SSTR2, APOE, ABCA1	128	110	13528	3.84318	1	0.650954	76.4451
GOTERM_BP_FAT	GO:0045449~regulation of transcription	32	15.6098	0.0871177	DPF3, TSHZ2, PAX3, ANKRD1, IL11, ARX, NPAS1, ZNF703, LYL1, TIGD3, MKX, GFI1, POU3F1, ZNF599, NFATC2, NKX2-5, SERTAD1, CEBPA, EGR1, EGR3, EGR2, MAFB, TLE6, ZNF521, FOSB, CDKN1C, DLX2, ID2, JUN, HOXB9, SRCAP, RASD1	128	2601	13528	1.30027	1	0.658041	77.4071
GOTERM_BP_FAT	GO:0001944~vasculature development	6	2.92683	0.0876489	CTGF, APOE, JUN, RHOB, NKX2-5, ANGPTL4	128	251	13528	2.52639	1	0.657056	77.6207
GOTERM_BP_FAT	GO:0045444~fat cell differentiation	3	1.46341	0.0884382	CEBPA, SOCS1, IL11	128	53	13528	5.98231	1	0.657211	77.9346
GOTERM_BP_FAT	GO:0010647~positive regulation of cell communication	7	3.41463	0.0896307	CDKN1C, NCAM1, PTGS2, ADAMTS20, PIM2, CD226, IL11	128	329	13528	2.24867	1	0.6591	78.401
GOTERM_BP_FAT	GO:0033700~phospholipid efflux	2	0.97561	0.0900397	APOE, ABCA1	128	10	13528	21.1375	1	0.657619	78.5588
GOTERM_BP_FAT	GO:0030799~regulation of cyclic nucleotide metabolic process	4	1.95122	0.0901837	OPRM1, SSTR2, APOE, ABCA1	128	113	13528	3.74115	1	0.655028	78.6141
GOTERM_BP_FAT	GO:0050801~ion homeostasis	8	3.90244	0.0904848	SCN1A, EGR2, APOE, JUN, SLC9A3, RYR1, STC1, POU3F1	128	409	13528	2.06724	1	0.653133	78.7293
GOTERM_BP_FAT	GO:0019228~regulation of action potential in neuron	3	1.46341	0.0912954	SCN1A, EGR2, POU3F1	128	54	13528	5.87153	1	0.653417	79.0366
GOTERM_BP_FAT	GO:0008544~epidermis development	5	2.43902	0.0950674	PTGS2, CTGF, SPRR1B, POU3F1, SNAI1	128	184	13528	2.87194	1	0.665896	80.4125
GOTERM_BP_FAT	GO:0006140~regulation of nucleotide metabolic process	4	1.95122	0.0957258	OPRM1, SSTR2, APOE, ABCA1	128	116	13528	3.6444	1	0.665464	80.6437
GOTERM_BP_FAT	GO:0042472~inner ear morphogenesis	3	1.46341	0.0970898	MAFB, TMIE, GFI1	128	56	13528	5.66183	1	0.667853	81.1148
GOTERM_BP_FAT	GO:0021895~cerebral cortex neuron differentiation	2	0.97561	0.0985887	ARX, DLX2	128	11	13528	19.2159	1	0.670721	81.62
