# Supplementary material for: Comprehensive Expression Profiling and Functional Network Analysis of Porphyra-334, One Mycosporine-Like Amino Acid (MAA), in Human Keratinocyte Exposed with UV-radiation
Source: Mar Drugs. 2017 Jun 24;15(7):196. doi: 10.3390/md15070196 (PMC5532638; doi:10.3390/md15070196)
Supplement: Supplementary file 1 [file marinedrugs-15-00196-s001.zip › Supplementary Table S2.xlsx]

## Sheet: Go analysis
Category	Term	Count	%	PValue	Genes	List Total	Pop Hits	Pop Total	Fold Enrichment	Bonferroni	Benjamini	FDR
GOTERM_BP_FAT	GO:0050778~positive regulation of immune response	5	4.03226	0.0147472	CFHR1, C7, SH2B2, NFAM1, IDO1	89	145	13528	5.24138	0.999932	0.999932	19.88
GOTERM_BP_FAT	GO:0006355~regulation of transcription, DNA-dependent	20	16.129	0.0181912	ZNF845, ZNF563, ZNF547, ZNF90, ZNF823, HOXA11, ZNF91, ZNF35, ZNF549, NRIP2, HOXB3, ZNF223, ZNF383, ZNF431, POU4F1, ZNF70, MAPRE3, ZNF256, ZNF99, PITX2	89	1773	13528	1.71461	0.999993	0.997341	23.958
GOTERM_BP_FAT	GO:0051252~regulation of RNA metabolic process	20	16.129	0.0225241	ZNF845, ZNF563, ZNF547, ZNF90, ZNF823, HOXA11, ZNF91, ZNF35, ZNF549, NRIP2, HOXB3, ZNF223, ZNF383, ZNF431, POU4F1, ZNF70, MAPRE3, ZNF256, ZNF99, PITX2	89	1813	13528	1.67678	1	0.992595	28.8136
GOTERM_BP_FAT	GO:0002253~activation of immune response	4	3.22581	0.0233179	CFHR1, C7, SH2B2, NFAM1	89	94	13528	6.46809	1	0.977861	29.6711
GOTERM_BP_FAT	GO:0006350~transcription	21	16.9355	0.0475339	ZNF845, SNORA25, ZNF563, ZNF547, ZNF441, ZNF90, ZNF823, EID2B, HOXA11, ZNF91, ZNF35, ZNF549, NRIP2, HOXB3, ZNF223, ZNF383, ZNF431, POU4F1, ZNF70, ZNF256, ZNF99	89	2101	13528	1.51928	1	0.998149	51.6422
GOTERM_BP_FAT	GO:0006599~phosphagen metabolic process	2	1.6129	0.0570612	GATM, CKMT2	89	9	13528	33.7778	1	0.998211	58.3771
GOTERM_BP_FAT	GO:0006600~creatine metabolic process	2	1.6129	0.0570612	GATM, CKMT2	89	9	13528	33.7778	1	0.998211	58.3771
GOTERM_BP_FAT	GO:0048584~positive regulation of response to stimulus	5	4.03226	0.0678345	CFHR1, C7, SH2B2, NFAM1, IDO1	89	236	13528	3.22034	1	0.99847	64.9344
GOTERM_BP_FAT	GO:0045449~regulation of transcription	24	19.3548	0.0687532	ZNF845, SNORA25, ZNF563, ZNF547, ZNF441, ZNF90, ZNF823, EID2B, HOXA11, ZNF91, ZNF35, NFAM1, ZNF549, NRIP2, HOXB3, ZNF223, ZNF383, ZNF431, POU4F1, ZNF70, MAPRE3, ZNF256, ZNF99, PITX2	89	2601	13528	1.40254	1	0.996823	65.4464
GOTERM_BP_FAT	GO:0002684~positive regulation of immune system process	5	4.03226	0.0695121	CFHR1, C7, SH2B2, NFAM1, IDO1	89	238	13528	3.19328	1	0.994323	65.8641
GOTERM_BP_FAT	GO:0032869~cellular response to insulin stimulus	3	2.41935	0.0723277	GAB1, PDE3B, SH2B2	89	68	13528	6.70588	1	0.992171	67.3731
GOTERM_BP_FAT	GO:0043434~response to peptide hormone stimulus	4	3.22581	0.0789649	GATM, GAB1, PDE3B, SH2B2	89	154	13528	3.94805	1	0.992019	70.6874
GOTERM_BP_FAT	GO:0051216~cartilage development	3	2.41935	0.0836727	HOXB3, FGF18, HOXA11	89	74	13528	6.16216	1	0.990941	72.8448
GOTERM_BP_FAT	GO:0060350~endochondral bone morphogenesis	2	1.6129	0.0992059	FGF18, HOXA11	89	16	13528	19	1	0.994438	78.9583
