# Supplementary material for: Comprehensive Expression Profiling and Functional Network Analysis of Porphyra-334, One Mycosporine-Like Amino Acid (MAA), in Human Keratinocyte Exposed with UV-radiation
Source: Mar Drugs. 2017 Jun 24;15(7):196. doi: 10.3390/md15070196 (PMC5532638; doi:10.3390/md15070196)
Supplement: Supplementary file 1 [file marinedrugs-15-00196-s001.zip › Supplementary Table S3.xlsx]

## Sheet: 1. DAVID(upregulated miRNAs)
Category	Term	Count	%	PValue	Genes	List Total	Pop Hits	Pop Total	Fold Enrichment	Bonferroni	Benjamini	FDR
GOTERM_BP_FAT	GO:0006414~translational elongation	40	1.77699	6.99595e-11	TUFM, RPL15, RPL27A, RPS15A, RPL36, RPL37, RPL39, VARS, RPS25, RPS28, RPS3A, RPL9, RPL34, RPLP1, RPL8, RPL3, SEPSECS, FAU, RPL11, RPL7A, RPS23, RPS24, EEF1A1, RPL27, EEF2, RPL24, RPS5, SELT, RPL28, RPS8, RPL29, RPL18A, RPS16, RPL41, RPL13A, RPL22, RPS14, RPS15, RPS10, UBB	1755	101	13528	3.05278	2.89422e-07	2.89422e-07	1.30481e-07
GOTERM_BP_FAT	GO:0007049~cell cycle	163	7.24123	1.64145e-10	TUSC2, KIFC1, XRCC2, TUBB2B, PRC1, TUBB2A, BTRC, JAG2, AURKA, AURKB, CD2AP, CUL5, CDCA8, RAD21, INCENP, VPS4B, H2AFX, SUPT5H, CCAR1, STAG1, RBL2, POLE, ESPL1, MYH9, PPP1CC, PPP1CB, WEE1, AHR, ESCO2, TACC1, PA2G4, EP300, RCC2, TIMELESS, ZWINT, PSMA4, NEK9, PDCD6IP, NUP43, NEK6, NEK2, MRE11A, CHEK1, CALR, PSMA7, RCC1, PIN1, SESN3, SPC24, TUBB, PSMB6, MACF1, PSMB1, NPM1, TFDP2, CLASP1, TFDP1, PARD6B…	1755	776	13528	1.61913	6.79069e-07	3.39534e-07	3.06146e-07
GOTERM_BP_FAT	GO:0065003~macromolecular complex assembly	144	6.39716	2.54363e-10	EIF6, HIST2H2AA3, XPO1, TUBB2B, TUBB2A, SNRPD3, SNRPD1, H1FX, CD2AP, GTF2E1, APOA1, HIST1H2BN, DDX23, VMA21, H2AFX, FAS, SYK, CLNS1A, IKBKAP, BCL10, PCBD2, SCUBE3, MED13, ADRM1, MED16, RPS14, RPS15, SMARCA5, CELF1, LAMC1, SNRPE, UNC13B, TRAF1, HSD17B10, EID2, DIAPH1, CALR, TRIM72, PXN, LLGL1, TUBB, NPM1, HIST1H4C, PARD6B, SHPRH, TSR1, CREBBP, CNKSR3, SMAD4, SKI, SMAD1, DVL1, TSC1, MYH11, TUBD1, H…	1755	665	13528	1.66916	1.0523e-06	3.50767e-07	4.74411e-07
GOTERM_BP_FAT	GO:0043933~macromolecular complex subunit organization	149	6.61928	1.2193e-09	EIF6, HIST2H2AA3, XPO1, TUBB2B, TUBB2A, SNRPD3, SNRPD1, H1FX, CD2AP, GTF2E1, HIST1H2BN, APOA1, DDX23, VMA21, H2AFX, FAS, SYK, CLNS1A, IKBKAP, BCL10, SCUBE3, PCBD2, ARID1A, MED13, ADRM1, MED16, RPS14, RPS15, SMARCA5, CELF1, LAMC1, SNRPE, UNC13B, TRAF1, HSD17B10, EID2, DIAPH1, CALR, TRIM72, PXN, LLGL1, TUBB, NPM1, HIST1H4C, SCARB1, PARD6B, SHPRH, TSR1, CREBBP, CNKSR3, SMAD4, SKI, SMAD1, DVL1, TSC1,…	1755	710	13528	1.61765	5.04424e-06	1.26106e-06	2.27411e-06
GOTERM_BP_FAT	GO:0006350~transcription	361	16.0373	1.22188e-09	MEF2C, MED25, BBX, HOXD13, RORA, MXI1, CITED4, PRIM1, SIN3B, ZNF776, SIN3A, MED28, MED29, PRIM2, PHTF2, ZNF772, CREB3L2, PATZ1, SUPT5H, PITX1, ZNF101, CCAR1, ZNF43, IKBKAP, ZNF641, YY2, RXRB, ZNF507, BARHL1, YY1, MECP2, ZNF503, MED13, ZNF793, MED19, HES1, MTF1, HES4, MED16, HES2, PARP15, ZNF785, PIAS2, MYBBP1A, TRAPPC2, SUV420H1, CRTC3, CRTC2, ZNF132, HOXA13, GPBP1L1, MYEF2, ZNF619, MYBL1, MYBL2,…	1755	2101	13528	1.32446	5.0549e-06	1.01098e-06	2.27892e-06
GOTERM_BP_FAT	GO:0000278~mitotic cell cycle	89	3.9538	6.16805e-09	KIFC1, PRC1, TUBB2B, TUBB2A, BTRC, AURKA, AURKB, CD2AP, AKT1, KIF2C, CCNE1, CDCA8, CUL5, RAD21, INCENP, PSMD2, PSMD3, E4F1, PSMD5, DYNC1H1, TUBB3, STAG1, VCPIP1, KHDRBS1, CDC6, CDK1, ARHGEF2, DSN1, POLE, CCNF, PAPD7, PAPD5, ESPL1, HMGA2, CDK4, PPP1CB, WEE1, PPM1D, CCND1, TIMELESS, RCC2, CDK11A, ZWINT, PSMA4, NEK9, MDM2, PSME3, MAPRE2, MAPRE1, UBB, KPNA2, NUP43, NEK6, BCAT1, PPP6C, HAUS3, NEK2, US…	1755	370	13528	1.85415	2.55169e-05	4.25286e-06	1.1504e-05
GOTERM_BP_FAT	GO:0006412~translation	81	3.5984	1.43069e-08	EIF6, RPL15, IARS2, WARS, EIF4EBP2, RPS3A, RPLP1, FAU, RPL11, EIF1, EIF2B2, MRPL32, MRPL2, CARS, MRPL3, BRF1, EIF2S3, MRPL9, EEF2, SARS2, EARS2, RSL1D1, EIF4G2, RPL41, RPS16, EIF5AL1, RPS14, RARS, RPS15, RPS10, UBB, AARS2, TUFM, MRPS16, MRPS11, RPL27A, MRPS10, RPS15A, RPL36, RPL37, PTRH2, RPL39, VARS, RPS25, EIF3C, QRSL1, RPS28, EIF3B, MRPL12, EIF3G, RPL34, MRPL17, RPL9, RPL8, LARS, SEPSECS, EIF3…	1755	331	13528	1.88631	5.91858e-05	8.45534e-06	2.66837e-05
GOTERM_BP_FAT	GO:0070271~protein complex biogenesis	110	4.88672	3.05002e-08	XPO1, TUBB2B, TUBB2A, CD2AP, GTF2E1, VMA21, FAS, SYK, IKBKAP, BCL10, PCBD2, SCUBE3, MED13, ADRM1, MED16, SMARCA5, LAMC1, UNC13B, TRAF1, HSD17B10, EID2, DIAPH1, CALR, TRIM72, PXN, LLGL1, TUBB, NPM1, PARD6B, CNKSR3, CREBBP, SMAD4, SKI, SMAD1, DVL1, TSC1, MYH11, TUBD1, CHAF1A, ATG16L1, CHAF1B, CACNA1A, E2F2, E2F3, ATL3, TP63, TRIM4, NDUFS5, MAZ, GTF2A1, GPX3, COX18, MYC, SLC1A1, MDN1, KPNB1, TUBA1C,…	1755	505	13528	1.67903	0.000126171	1.57723e-05	5.68857e-05
GOTERM_BP_FAT	GO:0006461~protein complex assembly	110	4.88672	3.05002e-08	XPO1, TUBB2B, TUBB2A, CD2AP, GTF2E1, VMA21, FAS, SYK, IKBKAP, BCL10, PCBD2, SCUBE3, MED13, ADRM1, MED16, SMARCA5, LAMC1, UNC13B, TRAF1, HSD17B10, EID2, DIAPH1, CALR, TRIM72, PXN, LLGL1, TUBB, NPM1, PARD6B, CNKSR3, CREBBP, SMAD4, SKI, SMAD1, DVL1, TSC1, MYH11, TUBD1, CHAF1A, ATG16L1, CHAF1B, CACNA1A, E2F2, E2F3, ATL3, TP63, TRIM4, NDUFS5, MAZ, GTF2A1, GPX3, COX18, MYC, SLC1A1, MDN1, KPNB1, TUBA1C,…	1755	505	13528	1.67903	0.000126171	1.57723e-05	5.68857e-05
GOTERM_BP_FAT	GO:0046907~intracellular transport	133	5.90849	9.95325e-08	XPO1, VPS54, ATP6AP1, CSPG5, SSR1, HOOK3, BAK1, VPS4B, RPL11, SAR1B, SAR1A, PABPN1, SCAMP3, MYO6, KIF5B, FUT10, MYH2, OPTN, ARNTL, MYH9, ERGIC1, ERGIC2, NPC2, RPAIN, ARRB1, RPS15, PEX26, SLC25A37, ERC1, MYBBP1A, TRAPPC2, MYL6, SNX9, STX7, MTX3, SNX1, RFFL, CALR, CDC37, MACF1, NPM1, TMED10, DOPEY2, HAP1, XPOT, GABARAPL2, RAB8A, TAOK2, TOMM40, SMG1, HNRNPA1, KIAA1279, TSC1, ATP2A2, PRICKLE1, ARF1, …	1755	657	13528	1.56042	0.000411681	4.57507e-05	0.000185637
GOTERM_BP_FAT	GO:0034621~cellular macromolecular complex subunit organization	82	3.64283	2.17221e-07	EIF6, XPO1, HIST2H2AA3, TUBB2B, TUBB2A, SNRPD3, SNRPD1, H1FX, KIF2C, NDUFS5, HIST1H2BN, MAZ, DDX23, VMA21, H2AFX, HIST3H2BB, COX18, KPNB1, TUBA1C, TUBB3, CLNS1A, ARL2, HIST1H1E, HSP90AA1, SF1, ARID1A, MBNL1, MBD2, HMGA1, FLNA, TTF2, ADRM1, HIST1H1T, PFDN6, IPO7, IPO4, NUP205, RPS14, TPPP, IPO5, RPS15, SMARCA5, CELF1, WASL, SNRPE, UNC13B, HIST1H2AB, HIST1H2AC, NUP98, EID2, DIAPH1, FKBP4, HIST1H2AE…	1755	357	13528	1.77053	0.00089824	8.98604e-05	0.000405137
GOTERM_BP_FAT	GO:0034622~cellular macromolecular complex assembly	75	3.33185	2.54031e-07	EIF6, HIST2H2AA3, XPO1, TUBB2B, TUBB2A, SNRPD3, SNRPD1, H1FX, NDUFS5, HIST1H2BN, DDX23, VMA21, H2AFX, HIST3H2BB, COX18, KPNB1, TUBA1C, TUBB3, CLNS1A, ARL2, HIST1H1E, HSP90AA1, SF1, MBNL1, MBD2, FLNA, ADRM1, HIST1H1T, PFDN6, IPO7, IPO4, NUP205, RPS14, TPPP, RPS15, IPO5, SMARCA5, CELF1, SNRPE, UNC13B, HIST1H2AB, HIST1H2AC, NUP98, EID2, DIAPH1, FKBP4, HIST1H2AE, FKBP1A, TSPYL4, CALR, PXN, TFAM, TUBB…	1755	318	13528	1.81799	0.00105037	9.5534e-05	0.00047379
GOTERM_BP_FAT	GO:0022402~cell cycle process	116	5.15327	3.39826e-07	KIFC1, XRCC2, TUBB2B, PRC1, TUBB2A, BTRC, AURKA, AURKB, CD2AP, CDCA8, CUL5, RAD21, INCENP, H2AFX, STAG1, POLE, ESPL1, MYH9, PPP1CB, WEE1, PA2G4, TIMELESS, RCC2, ZWINT, PSMA4, NEK9, NUP43, NEK6, NEK2, MRE11A, CHEK1, CALR, RCC1, PSMA7, SESN3, SPC24, TUBB, PSMB6, PSMB1, MACF1, NPM1, CLASP1, MKI67, WDR6, CDC20, GAS1, SUGT1, CDC27, ATM, PSMB9, NOTCH2, PLK1, PSMC3, SMC1A, AKT1, MEN1, CCNE1, KIF2C, PSMD…	1755	565	13528	1.58258	0.00140487	0.000117148	0.000633806
GOTERM_BP_FAT	GO:0045449~regulation of transcription	410	18.2141	2.89544e-06	MEF2C, MED25, HOXD13, RORA, MXI1, CITED4, ZNF776, MED28, MED29, PHTF2, ZNF772, PATZ1, ZNF101, CCAR1, ZNF43, ZNF641, IKBKAP, PCBD2, RXRB, ZNF507, BARHL1, MECP2, ZNF503, MED13, ZNF793, MED19, MED16, RPS14, ZNF785, MYBBP1A, TRAPPC2, CRTC3, CRTC2, ZNF132, ZNF619, MYBL1, MYBL2, ZNF618, ZNF616, PFN1, ZNF224, ZNF223, ZNF74, ZNF124, ARNTL2, ZNF70, ASXL2, ZNF69, ZNF623, KLF13, KLF10, ZNF621, ZSCAN2, ZNF62…	1755	2601	13528	1.21507	0.011907	0.000920996	0.00540013
GOTERM_BP_FAT	GO:0000087~M phase of mitotic cell cycle	55	2.44336	3.41488e-06	KIFC1, TUBB2B, TUBB2A, AURKA, AURKB, CD2AP, KIF2C, CDCA8, RAD21, INCENP, E4F1, TUBB3, STAG1, VCPIP1, CDK1, CDC6, ARHGEF2, DSN1, CCNF, PAPD7, ESPL1, PAPD5, HMGA2, WEE1, RCC2, TIMELESS, CDK11A, ZWINT, NEK9, MAPRE2, MAPRE1, NUP43, NEK6, HAUS3, NEK2, USP9X, HAUS1, RCC1, SPC24, TUBB, NCAPH, BUB1, CLASP1, PAFAH1B1, PDS5B, RPL24, CDC20, SUGT1, CDC27, SMC3, CDC25A, CCNB1, PLK1, CIT, SMC1A	1755	224	13528	1.89265	0.0140281	0.00100859	0.00636888
GOTERM_BP_FAT	GO:0007067~mitosis	54	2.39893	4.2836e-06	KIFC1, TUBB2B, TUBB2A, AURKA, AURKB, CD2AP, KIF2C, CDCA8, RAD21, INCENP, E4F1, TUBB3, STAG1, VCPIP1, CDK1, CDC6, ARHGEF2, DSN1, CCNF, PAPD7, ESPL1, PAPD5, HMGA2, WEE1, RCC2, TIMELESS, CDK11A, ZWINT, NEK9, MAPRE2, MAPRE1, NUP43, NEK6, HAUS3, NEK2, USP9X, HAUS1, RCC1, SPC24, TUBB, NCAPH, BUB1, CLASP1, PAFAH1B1, PDS5B, CDC20, SUGT1, CDC27, CDC25A, SMC3, CCNB1, PLK1, CIT, SMC1A	1755	220	13528	1.89203	0.0175652	0.00118072	0.00798901
GOTERM_BP_FAT	GO:0000280~nuclear division	54	2.39893	4.2836e-06	KIFC1, TUBB2B, TUBB2A, AURKA, AURKB, CD2AP, KIF2C, CDCA8, RAD21, INCENP, E4F1, TUBB3, STAG1, VCPIP1, CDK1, CDC6, ARHGEF2, DSN1, CCNF, PAPD7, ESPL1, PAPD5, HMGA2, WEE1, RCC2, TIMELESS, CDK11A, ZWINT, NEK9, MAPRE2, MAPRE1, NUP43, NEK6, HAUS3, NEK2, USP9X, HAUS1, RCC1, SPC24, TUBB, NCAPH, BUB1, CLASP1, PAFAH1B1, PDS5B, CDC20, SUGT1, CDC27, CDC25A, SMC3, CCNB1, PLK1, CIT, SMC1A	1755	220	13528	1.89203	0.0175652	0.00118072	0.00798901
GOTERM_BP_FAT	GO:0008104~protein localization	160	7.10795	5.69795e-06	XPO1, ATP6AP1, VPS54, VPS52, SELENBP1, AURKB, MXI1, HOOK3, SSR1, CXCL10, AAGAB, VPS4B, RPL11, SAR1B, SAR1A, SCAMP4, SCAMP3, MYO6, VANGL2, FUT10, GRIN2A, OPTN, ARNTL, MYH9, TNS4, RPAIN, FGFR1OP, PEX26, PDCD6IP, ERC1, NUP43, SNX9, RAB7B, STX7, MTX3, SNX1, AKAP10, RFFL, CALR, CDC37, TRAM2, MIA3, MACF1, SNF8, NPM1, TMED10, DOPEY2, GABARAPL2, RAB8A, RAB8B, TAOK2, MYO1C, TOMM40, ITGA2, DVL1, TRAF3IP2, …	1755	882	13528	1.39832	0.0232968	0.0014722	0.0106267
GOTERM_BP_FAT	GO:0048285~organelle fission	54	2.39893	1.4657e-05	KIFC1, TUBB2B, TUBB2A, AURKA, AURKB, CD2AP, KIF2C, CDCA8, RAD21, INCENP, E4F1, TUBB3, STAG1, VCPIP1, CDK1, CDC6, ARHGEF2, DSN1, CCNF, PAPD7, ESPL1, PAPD5, HMGA2, WEE1, RCC2, TIMELESS, CDK11A, ZWINT, NEK9, MAPRE2, MAPRE1, NUP43, NEK6, HAUS3, NEK2, USP9X, HAUS1, RCC1, SPC24, TUBB, NCAPH, BUB1, CLASP1, PAFAH1B1, PDS5B, CDC20, SUGT1, CDC27, CDC25A, SMC3, CCNB1, PLK1, CIT, SMC1A	1755	229	13528	1.81767	0.0588346	0.00356049	0.0273331
GOTERM_BP_FAT	GO:0010605~negative regulation of macromolecule metabolic process	135	5.99733	1.65431e-05	MEF2C, CBX2, CBX5, BAK1, EIF4EBP1, HOXC8, SIN3B, SIN3A, EIF4EBP2, BCL7A, SUPT5H, IBTK, GTPBP4, GABPA, CST3, GRIN2A, MECP2, SERPING1, PKIA, SUZ12, HES1, PA2G4, EIF2AK1, TIMELESS, RPS14, PSMA4, HES2, CELF1, HMGB1, EID2, ITGB3, CALR, PSMA7, IRAK3, TRIM66, PSMB6, PSMB1, NPM1, NR1H4, HNRNPAB, NKRF, SMAD7, SMAD6, KLF10, CD276, SMAD4, SKI, CDC20, SMAD1, CDC27, FOXP1, PSMB9, TSC1, HDAC1, PSMC3, MLX, RNF2…	1755	734	13528	1.41773	0.0661498	0.00379496	0.0308499
GOTERM_BP_FAT	GO:0006396~RNA processing	106	4.70902	1.6938e-05	PRPF4B, U2AF2, SNRPD3, LSM7, SNRPD1, SYNCRIP, SART3, DDX17, DDX23, RBM8A, INTS7, RBMS2, RPP30, RPL11, RBM10, MTO1, CCAR1, PABPN1, CLNS1A, EFTUD2, HNRNPA2B1, PTBP1, RRP9, CSTF2T, RSL1D1, PA2G4, AQR, RPS16, RPS14, RPS15, CELF1, SNRPE, HSD17B10, ELAC2, NHP2L1, PPIL1, DUSP11, ZFC3H1, PPAN, HNRNPM, WDR55, RPS28, AGGF1, CNOT6L, HNRNPF, RPS24, DHX8, TSEN54, CSTF2, RNPS1, HEATR1, SMAD1, DDX5, HNRNPA1, DD…	1755	547	13528	1.49374	0.0676742	0.00368126	0.0315862
GOTERM_BP_FAT	GO:0031396~regulation of protein ubiquitination	30	1.33274	1.69959e-05	BTRC, FKBP1A, PSMA7, FEM1B, FEM1A, PIN1, PSMF1, PSMB6, PSMB1, PSMD2, PSMD3, PSMD5, DNAJA3, AXIN1, CDK1, BCL10, GTPBP4, SMAD7, CDC20, CDC27, PSMB9, CCNB1, TSC1, PLK1, PSMD11, PSMC3, PSMA4, PSME3, UBB, ZER1	1755	100	13528	2.31248	0.0678977	0.00350946	0.0316942
GOTERM_BP_FAT	GO:0051301~cell division	65	2.88761	1.84494e-05	KIFC1, PRC1, CDC14B, AURKB, CD2AP, CDC42, CCNE1, CDCA8, RAD21, RNF103, EVI5, INCENP, VPS4B, E4F1, STAG1, CDC6, CDK1, ARHGEF2, DSN1, CCNF, PAPD7, ESPL1, PAPD5, MYH9, HMGA2, PPP1CC, CDK4, PPP1CB, WEE1, TACC1, CCND1, CHMP1B, RCC2, TIMELESS, CDK11A, ZWINT, NEK9, MAPRE2, MAPRE1, PDCD6IP, NUP43, SPAST, NEK6, HAUS3, NEK2, USP9X, HAUS1, RCC1, SPC24, NCAPH, BUB1, PAFAH1B1, CLASP1, RASA1, PARD6B, PDS5B, CD…	1755	295	13528	1.69843	0.0734859	0.00362797	0.0344043
GOTERM_BP_FAT	GO:0000377~RNA splicing, via transesterification reactions with bulged adenosine as nucleophile	40	1.77699	1.95789e-05	POLR2F, POLR2E, POLR2L, NHP2L1, TRA2B, U2AF2, SNRPD3, POLR2I, LSM7, SNRPD1, SF3B3, HNRNPM, DDX23, CD2BP2, RBM8A, PRPF8, HNRNPF, PCBP1, PCBP2, SNRNP70, GEMIN6, CCAR1, CLNS1A, PABPN1, CSTF2, EFTUD2, PTBP1, HNRNPA2B1, SF1, RNPS1, MBNL1, HNRNPA1, SF3A3, PHAX, HNRNPUL1, CELF1, SMC1A, CSTF1, CPSF2, SNRPE	1755	153	13528	2.01523	0.0778052	0.00367499	0.0365102
GOTERM_BP_FAT	GO:0000398~nuclear mRNA splicing, via spliceosome	40	1.77699	1.95789e-05	POLR2F, POLR2E, POLR2L, NHP2L1, TRA2B, U2AF2, SNRPD3, POLR2I, LSM7, SNRPD1, SF3B3, HNRNPM, DDX23, CD2BP2, RBM8A, PRPF8, HNRNPF, PCBP1, PCBP2, SNRNP70, GEMIN6, CCAR1, CLNS1A, PABPN1, CSTF2, EFTUD2, PTBP1, HNRNPA2B1, SF1, RNPS1, MBNL1, HNRNPA1, SF3A3, PHAX, HNRNPUL1, CELF1, SMC1A, CSTF1, CPSF2, SNRPE	1755	153	13528	2.01523	0.0778052	0.00367499	0.0365102
GOTERM_BP_FAT	GO:0000375~RNA splicing, via transesterification reactions	40	1.77699	1.95789e-05	POLR2F, POLR2E, POLR2L, NHP2L1, TRA2B, U2AF2, SNRPD3, POLR2I, LSM7, SNRPD1, SF3B3, HNRNPM, DDX23, CD2BP2, RBM8A, PRPF8, HNRNPF, PCBP1, PCBP2, SNRNP70, GEMIN6, CCAR1, CLNS1A, PABPN1, CSTF2, EFTUD2, PTBP1, HNRNPA2B1, SF1, RNPS1, MBNL1, HNRNPA1, SF3A3, PHAX, HNRNPUL1, CELF1, SMC1A, CSTF1, CPSF2, SNRPE	1755	153	13528	2.01523	0.0778052	0.00367499	0.0365102
GOTERM_BP_FAT	GO:0045184~establishment of protein localization	140	6.21946	1.9795e-05	XPO1, VPS54, ATP6AP1, VPS52, SELENBP1, HOOK3, SSR1, CXCL10, AAGAB, VPS4B, RPL11, SAR1B, SAR1A, SCAMP4, SCAMP3, MYO6, FUT10, OPTN, ARNTL, MYH9, RPAIN, PEX26, PDCD6IP, ERC1, NUP43, SNX9, RAB7B, STX7, MTX3, SNX1, RFFL, CALR, CDC37, TRAM2, MIA3, MACF1, SNF8, NPM1, TMED10, DOPEY2, GABARAPL2, RAB8A, RAB8B, TAOK2, MYO1C, TOMM40, ITGA2, TRAF3IP2, PRICKLE1, ARF1, TRPS1, YIPF5, GOSR1, SYTL3, ATG16L1, CLTA,…	1755	769	13528	1.40332	0.0786292	0.00355422	0.0369131
GOTERM_BP_FAT	GO:0008380~RNA splicing	63	2.79876	2.0274e-05	HNRNPA1L2, PRPF4B, ZMAT5, SNRPD3, U2AF2, LSM7, SNRPD1, SYNCRIP, DDX23, RBM8A, PCBP1, PCBP2, RBM10, CCAR1, ZCCHC8, PABPN1, TFIP11, CLNS1A, PPP2R1A, EFTUD2, PTBP1, HNRNPA2B1, SF1, MBNL1, CDC5L, TTF2, AQR, ESRP1, KHSRP, CELF1, SNRPE, CPSF2, POLR2F, POLR2E, POLR2L, NHP2L1, TRA2B, PPIL1, POLR2I, SF3B3, PPAN, HNRNPM, CD2BP2, HNRNPF, PPP2CA, PRPF8, DHX16, SCNM1, SNRNP70, GEMIN6, RBM28, DHX8, TSEN54, CST…	1755	284	13528	1.70993	0.0804534	0.00348868	0.0378063
GOTERM_BP_FAT	GO:0032774~RNA biosynthetic process	65	2.88761	2.06245e-05	E2F2, PPARA, E2F3, TCOF1, HOXD13, CRCP, NFKB1, CBFB, TMF1, PRIM1, GTF2E1, MAZ, GTF2A1, GATA3, PRIM2, SUPT5H, MYC, AR, BRF1, PTGER3, GABPA, TP53, CDK9, MED13, TTF2, AHR, CD3EAP, ADRM1, MED7, MED16, SMARCA5, NFE2L1, LCOR, POLR2F, POLR2E, POLR2L, POLR2I, BMPR2, HCFC1, MYEF2, TFAM, MRPL12, HAND1, NFAT5, BTF3, MLLT1, GTF3C2, APEX1, TRIP11, GTF3C1, RUNX3, KAT2A, CEBPB, POLR3K, KLF13, TRIM29, CREB5, POL…	1755	296	13528	1.69269	0.0817855	0.00340715	0.0384596
GOTERM_BP_FAT	GO:0032268~regulation of cellular protein metabolic process	94	4.17592	2.14105e-05	HSP90AB1, CPEB2, IL6ST, BTRC, NFKB1, AKT1, MEN1, BAK1, MAP3K6, EIF4EBP1, PRKAR2A, APOA1, EIF4EBP2, RBM8A, PSMD2, PSMD3, EIF1, PSMD5, FAM129A, EIF2B2, FGF2, SYK, PRKCA, IBTK, PPP2R1A, CDK1, BCL10, GTPBP4, CCDC88A, PKN1, SERPING1, CDK4, EIF4G2, CCND1, PA2G4, EIF2AK1, EP300, HIPK3, EIF5AL1, PSMA4, MDM2, PEBP1, PSME3, UBB, PPP1R15B, CLN8, ZER1, SRP9, MKNK2, BMPR2, FKBP1A, ITGB3, CALR, PSMA7, FEM1B, F…	1755	474	13528	1.52864	0.0847667	0.00340098	0.0399251
GOTERM_BP_FAT	GO:0051248~negative regulation of protein metabolic process	46	2.04354	2.27815e-05	HSP90AB1, NFKB1, FKBP1A, ITGB3, CALR, PSMA7, MEN1, PSMF1, IRAK3, BAK1, EIF4EBP1, EIF4EBP2, PSMB6, PSMB1, PPP2CA, PSMD2, PSMD3, PSMD5, THBS1, FAM129A, TNRC6A, IBTK, PRKCA, PPP2R1A, GTPBP4, NF2, SMAD7, SMAD6, GRIN2A, CDC20, SERPING1, CDC27, YWHAE, FLNA, PSMB9, EIF2AK1, TSC1, PSMC3, PSMD11, PSMA4, PEBP1, DNMT1, PSME3, UBB, CLN8, SRP9	1755	187	13528	1.89615	0.0899431	0.00348459	0.0424811
GOTERM_BP_FAT	GO:0010608~posttranscriptional regulation of gene expression	50	2.22124	2.76495e-05	CPEB2, HPS4, SYNCRIP, AURKA, PTEN, AKT1, ASGR2, EIF4EBP1, EIF4EBP2, APOA1, RBM8A, EIF1, EIF2B2, FAM129A, PRKCA, GTPBP4, BRF1, APTX, CDK4, UBE2B, FLNA, EIF4G2, PA2G4, EIF2AK1, SERBP1, EIF5AL1, CELF1, PPP1R15B, SRP9, MKNK2, SOX4, CALR, SRRT, EIF3B, MORC3, SEPSECS, EIF3K, THBS1, TNRC6A, DNAJA3, SMAD7, PAIP1, IREB2, ITGA2, SMAD1, SELT, RPS5, EIF4B, COG3, TSC1	1755	211	13528	1.8266	0.108088	0.00407693	0.0515563
GOTERM_BP_FAT	GO:0015031~protein transport	138	6.13061	3.02667e-05	XPO1, VPS54, ATP6AP1, VPS52, SELENBP1, HOOK3, SSR1, CXCL10, AAGAB, VPS4B, RPL11, SAR1B, SAR1A, SCAMP4, SCAMP3, MYO6, FUT10, OPTN, ARNTL, MYH9, RPAIN, PEX26, PDCD6IP, ERC1, NUP43, SNX9, RAB7B, STX7, MTX3, SNX1, RFFL, CALR, CDC37, TRAM2, MIA3, MACF1, SNF8, NPM1, TMED10, DOPEY2, GABARAPL2, RAB8A, RAB8B, TAOK2, MYO1C, TOMM40, TRAF3IP2, PRICKLE1, ARF1, TRPS1, YIPF5, GOSR1, SYTL3, ATG16L1, CLTA, SEC24A…	1755	762	13528	1.39598	0.117693	0.00430845	0.0564351
GOTERM_BP_FAT	GO:0034613~cellular protein localization	83	3.68725	3.52895e-05	XPO1, CLTA, SEC24A, ATP6AP1, HPS4, RASSF9, AURKB, CLTC, SSR1, AKT1, CDC42, IMMP2L, AP2B1, SRPR, ZFYVE16, RPL11, NCKIPSD, RANBP2, SAR1B, COX18, FGF2, KDELR1, SAR1A, KPNB1, KDELR2, SYNRG, ARHGEF2, MYO6, STX3, FUT10, TP53, RPH3AL, OPTN, ARNTL, FLNA, MFN2, RPAIN, IPO7, IPO4, EIF5AL1, NUP205, ARCN1, IPO5, PEX26, KPNA6, KPNA3, KPNA2, SRP9, BID, SNX9, YWHAZ, NUP98, STX7, MTX3, SNX1, RFFL, CALR, CDC37, W…	1755	411	13528	1.55666	0.135838	0.00485468	0.0657977
GOTERM_BP_FAT	GO:0016071~mRNA metabolic process	76	3.37628	4.35725e-05	HNRNPA1L2, PRPF4B, ZMAT5, U2AF2, SNRPD3, LSM7, SNRPD1, SYNCRIP, DDX23, RBM8A, PCBP1, PCBP2, RBM10, ZCCHC8, CSDC2, CCAR1, PABPN1, TFIP11, CLNS1A, KHDRBS1, BRF1, EFTUD2, PTBP1, HNRNPA2B1, SF1, CDC5L, MBNL1, CSTF2T, TTF2, AQR, SERBP1, KHSRP, ESRP1, CPSF6, CELF1, SNRPE, CPSF2, POLR2F, POLR2E, POLR2L, NHP2L1, TRA2B, PPIL1, POLR2I, RNH1, HSPA1B, SF3B3, HNRNPM, CNOT6L, CD2BP2, HNRNPF, PRPF8, DHX16, SCNM…	1755	370	13528	1.58332	0.16495	0.00579807	0.0812356
GOTERM_BP_FAT	GO:0070727~cellular macromolecule localization	83	3.68725	4.55325e-05	XPO1, CLTA, SEC24A, ATP6AP1, HPS4, RASSF9, AURKB, CLTC, SSR1, AKT1, CDC42, IMMP2L, AP2B1, SRPR, ZFYVE16, RPL11, NCKIPSD, RANBP2, SAR1B, COX18, FGF2, KDELR1, SAR1A, KPNB1, KDELR2, SYNRG, ARHGEF2, MYO6, STX3, FUT10, TP53, RPH3AL, OPTN, ARNTL, FLNA, MFN2, RPAIN, IPO7, IPO4, EIF5AL1, NUP205, ARCN1, IPO5, PEX26, KPNA6, KPNA3, KPNA2, SRP9, BID, SNX9, YWHAZ, NUP98, STX7, MTX3, SNX1, RFFL, CALR, CDC37, W…	1755	414	13528	1.54538	0.171694	0.00586935	0.0848884
GOTERM_BP_FAT	GO:0022403~cell cycle phase	83	3.68725	4.55325e-05	KIFC1, XRCC2, PRC1, TUBB2B, TUBB2A, AURKA, AURKB, CD2AP, AKT1, KIF2C, CCNE1, CDCA8, CUL5, RAD21, INCENP, H2AFX, E4F1, DYNC1H1, TUBB3, STAG1, VCPIP1, KHDRBS1, CDC6, CDK1, ARHGEF2, DSN1, POLE, CCNF, PAPD7, PAPD5, ESPL1, MYH9, HMGA2, CDK4, PPP1CB, WEE1, RAD51, PPM1D, CCND1, TIMELESS, RCC2, CDK11A, ZWINT, MDM2, NEK9, MAPRE2, MAPRE1, KPNA2, NUP43, NEK6, BCAT1, PPP6C, HAUS3, CEP120, NEK2, MRE11A, USP9X…	1755	414	13528	1.54538	0.171694	0.00586935	0.0848884
GOTERM_BP_FAT	GO:0006351~transcription, DNA-dependent	63	2.79876	4.88272e-05	E2F2, PPARA, E2F3, TCOF1, HOXD13, CRCP, NFKB1, CBFB, TMF1, GTF2E1, MAZ, GTF2A1, GATA3, SUPT5H, MYC, AR, BRF1, PTGER3, GABPA, TP53, CDK9, MED13, TTF2, AHR, CD3EAP, ADRM1, MED7, MED16, SMARCA5, NFE2L1, LCOR, POLR2F, POLR2E, POLR2L, POLR2I, BMPR2, HCFC1, MYEF2, TFAM, MRPL12, HAND1, NFAT5, BTF3, MLLT1, GTF3C2, APEX1, TRIP11, GTF3C1, RUNX3, KAT2A, CEBPB, POLR3K, KLF13, TRIM29, CREB5, POLR3A, POLR3D, M…	1755	292	13528	1.66308	0.182908	0.00610261	0.0910281
GOTERM_BP_FAT	GO:0006913~nucleocytoplasmic transport	39	1.73256	7.25086e-05	XPO1, NUP98, ATP6AP1, CALR, AKT1, NPM1, LSG1, RANBP2, NCKIPSD, TNPO1, FGF2, KPNB1, XPOT, PABPN1, UPF2, TP53, SMG1, ARNTL, NUP155, HNRNPA1, ATXN1, PHAX, RPAIN, PRICKLE1, TSC1, IPO7, GSK3B, TRPS1, EIF5AL1, NUP205, MLX, IPO4, RPS15, IPO5, KPNA6, KPNA3, KPNA2, MYBBP1A, TOB1	1755	156	13528	1.92707	0.259166	0.0087841	0.135149
GOTERM_BP_FAT	GO:0006260~DNA replication	45	1.99911	7.45213e-05	ING5, CLSPN, HMGB1, NUP98, WRNIP1, MRE11A, CHEK1, MCM10, CDT1, TK1, PRIM1, TFAM, RPA2, TYMP, MCM7, PRIM2, E4F1, POLQ, TERF2, DNAJA3, POLL, CDC6, POLI, RBBP4, CCDC88A, POLG, DTL, POLE, PAPD7, IGF1, PAPD5, WRN, MCM3, RBBP7, HMGA1, CDC25A, RAD51, RPAIN, RRM1, CHAF1A, NFIC, CHAF1B, NFIB, REPIN1, REV3L	1755	190	13528	1.82564	0.26531	0.00877007	0.138898
GOTERM_BP_FAT	GO:0006397~mRNA processing	67	2.97645	7.94672e-05	HNRNPA1L2, PRPF4B, ZMAT5, SNRPD3, U2AF2, LSM7, SNRPD1, SYNCRIP, DDX23, RBM8A, PCBP1, PCBP2, RBM10, CSDC2, CCAR1, ZCCHC8, PABPN1, TFIP11, CLNS1A, KHDRBS1, EFTUD2, PTBP1, HNRNPA2B1, SF1, CDC5L, MBNL1, CSTF2T, TTF2, AQR, KHSRP, ESRP1, CPSF6, CELF1, SNRPE, CPSF2, POLR2F, POLR2E, POLR2L, NHP2L1, TRA2B, PPIL1, POLR2I, SF3B3, HNRNPM, CNOT6L, CD2BP2, HNRNPF, PRPF8, DHX16, SCNM1, SNRNP70, GEMIN6, RBM28, D…	1755	321	13528	1.60889	0.280191	0.00909089	0.14811
GOTERM_BP_FAT	GO:0032269~negative regulation of cellular protein metabolic process	43	1.91026	8.96991e-05	HSP90AB1, NFKB1, FKBP1A, ITGB3, CALR, PSMA7, MEN1, PSMF1, BAK1, EIF4EBP1, EIF4EBP2, PSMB6, PSMB1, PPP2CA, PSMD2, PSMD3, PSMD5, THBS1, FAM129A, TNRC6A, IBTK, PRKCA, PPP2R1A, GTPBP4, NF2, SMAD7, SMAD6, CDC20, SERPING1, CDC27, YWHAE, PSMB9, EIF2AK1, TSC1, PSMC3, PSMD11, PSMA4, PEBP1, DNMT1, PSME3, UBB, CLN8, SRP9	1755	180	13528	1.84142	0.310026	0.00997965	0.167165
GOTERM_BP_FAT	GO:0051438~regulation of ubiquitin-protein ligase activity	24	1.06619	9.27916e-05	CDK1, SMAD7, BTRC, CDC20, FEM1B, PSMA7, FEM1A, CDC27, PIN1, PSMB9, CCNB1, PSMF1, PSMB6, PSMB1, PLK1, PSMC3, PSMD11, PSMA4, PSMD2, PSMD3, PSME3, UBB, PSMD5, ZER1	1755	78	13528	2.37177	0.318798	0.0100517	0.172923
GOTERM_BP_FAT	GO:0000279~M phase	68	3.02088	9.52329e-05	KIFC1, XRCC2, PRC1, TUBB2B, TUBB2A, AURKA, AURKB, CD2AP, KIF2C, CDCA8, RAD21, INCENP, H2AFX, E4F1, DYNC1H1, TUBB3, STAG1, VCPIP1, CDC6, CDK1, ARHGEF2, DSN1, CCNF, PAPD7, ESPL1, PAPD5, MYH9, HMGA2, WEE1, RAD51, RCC2, TIMELESS, CDK11A, ZWINT, NEK9, MAPRE2, MAPRE1, KPNA2, NUP43, NEK6, HAUS3, CEP120, NEK2, USP9X, MRE11A, HAUS1, CHEK1, RCC1, SPC24, TUBB, NCAPH, BUB1, PAFAH1B1, CLASP1, PDS5B, MKI67, CD…	1755	329	13528	1.5932	0.325644	0.0100516	0.177469
GOTERM_BP_FAT	GO:0051169~nuclear transport	39	1.73256	9.69338e-05	XPO1, NUP98, ATP6AP1, CALR, AKT1, NPM1, LSG1, RANBP2, NCKIPSD, TNPO1, FGF2, KPNB1, XPOT, PABPN1, UPF2, TP53, SMG1, ARNTL, NUP155, HNRNPA1, ATXN1, PHAX, RPAIN, PRICKLE1, TSC1, IPO7, GSK3B, TRPS1, EIF5AL1, NUP205, MLX, IPO4, RPS15, IPO5, KPNA6, KPNA3, KPNA2, MYBBP1A, TOB1	1755	158	13528	1.90267	0.330373	0.00997577	0.180636
GOTERM_BP_FAT	GO:0030163~protein catabolic process	114	5.06442	9.72964e-05	TMEM189-UBE2V1, BTRC, MYLIP, CD2AP, KLHL3, CNOT4, G2E3, CUL5, ERAP1, RNF149, AUP1, DTL, UBR3, UBR1, SOCS5, MYH9, PSMA4, YME1L1, PIAS2, FBXO11, RAD23B, FBXO40, UBE2V1, RFFL, PSMA7, ASB16, RBX1, UBE2D4, ARIH1, FBXW8, PSMB6, PSMB1, OTUD7B, HECTD3, FBXW2, FBXO47, FBXO45, AXIN1, HECTD1, NPLOC4, SHPRH, UFSP2, HACE1, CDC20, PCNP, SUGT1, CDC27, PSMB9, TULP4, UBA1, PSMC3, RNF2, UBE2G1, UCHL1, NFKB1, FBXL1…	1755	622	13528	1.41277	0.331377	0.00976988	0.181311
GOTERM_BP_FAT	GO:0044257~cellular protein catabolic process	111	4.93114	0.000100491	TMEM189-UBE2V1, BTRC, MYLIP, CD2AP, KLHL3, CNOT4, G2E3, CUL5, ERAP1, RNF149, AUP1, DTL, UBR3, UBR1, SOCS5, MYH9, PSMA4, PIAS2, FBXO11, RAD23B, FBXO40, UBE2V1, RFFL, ASB16, PSMA7, RBX1, UBE2D4, ARIH1, FBXW8, PSMB6, PSMB1, OTUD7B, HECTD3, FBXW2, FBXO47, FBXO45, HECTD1, NPLOC4, SHPRH, UFSP2, HACE1, CDC20, PCNP, SUGT1, CDC27, PSMB9, TULP4, UBA1, PSMC3, RNF2, UBE2G1, UCHL1, NFKB1, FBXL19, ZYG11A, PSMD…	1755	603	13528	1.41893	0.340156	0.00985004	0.187259
GOTERM_BP_FAT	GO:0006886~intracellular protein transport	75	3.33185	0.000107586	XPO1, CLTA, SEC24A, ATP6AP1, HPS4, RASSF9, CLTC, SSR1, AKT1, IMMP2L, AP2B1, SRPR, ZFYVE16, RPL11, NCKIPSD, RANBP2, SAR1B, FGF2, KDELR1, SAR1A, KPNB1, KDELR2, SYNRG, ARHGEF2, MYO6, STX3, FUT10, TP53, RPH3AL, OPTN, ARNTL, MFN2, RPAIN, IPO7, IPO4, EIF5AL1, NUP205, IPO5, PEX26, ARCN1, KPNA6, KPNA3, KPNA2, SRP9, BID, SNX9, YWHAZ, NUP98, STX7, MTX3, SNX1, RFFL, CALR, CDC37, WDR19, MACF1, NPM1, RAB11A, …	1755	374	13528	1.54577	0.359245	0.010298	0.200468
GOTERM_BP_FAT	GO:0031398~positive regulation of protein ubiquitination	25	1.11062	0.000114232	BCL10, CDK1, SMAD7, BTRC, CDC20, FKBP1A, PSMA7, CDC27, PSMB9, PIN1, CCNB1, PSMF1, PSMB6, PSMB1, PSMC3, PSMD11, PLK1, PSMA4, PSMD2, PSMD3, PSME3, PSMD5, UBB, DNAJA3, AXIN1	1755	84	13528	2.29413	0.376624	0.0106836	0.212839
GOTERM_BP_FAT	GO:0044265~cellular macromolecule catabolic process	129	5.73079	0.00012443	TMEM189-UBE2V1, BTRC, MYLIP, CD2AP, KLHL3, CNOT4, G2E3, CUL5, RBM8A, ERAP1, RNF149, AUP1, DTL, UBR3, UBR1, SOCS5, MYH9, PSMA4, PIAS2, FBXO11, RAD23B, FBXO40, UBE2V1, OAS2, HSPA1B, RFFL, PSMA7, ASB16, RBX1, UBE2D4, ARIH1, FBXW8, PSMB6, PSMB1, OTUD7B, HECTD3, FBXW2, FBXO47, NTHL1, FBXO45, HECTD1, NPLOC4, SHPRH, UFSP2, HACE1, SMG1, RNPS1, CDC20, PCNP, SUGT1, CDC27, ATM, PSMB9, DNASE2, TULP4, DCP2, U…	1755	725	13528	1.37154	0.402379	0.0113748	0.231819
GOTERM_BP_FAT	GO:0007017~microtubule-based process	55	2.44336	0.000126704	KIFC1, PRC1, TUBB2B, KIF27, TUBB2A, UCHL1, AURKA, TTL, HOOK3, KIF2C, DYNLL1, DYNC1H1, PPP4C, TUBB3, TUBA1C, STMN3, KIF5B, ESPL1, MYH9, UBE2B, BICD2, KIF1C, KIF1A, KIF1B, ZWINT, TPPP, FGFR1OP, KPNA2, SPAST, HAUS3, DNAH9, CEP120, NEK2, DNAH17, HAUS1, KLC2, RCC1, TUBB, MACF1, KIF6, NPM1, CLASP1, PAFAH1B1, HAP1, MAP1B, KIF18B, DOCK7, TUBGCP2, SMC3, TUBD1, CKS2, RHOT2, SMC1A, KIF20A, RANBP10	1755	253	13528	1.67571	0.407977	0.0113312	0.236051
GOTERM_BP_FAT	GO:0043632~modification-dependent macromolecule catabolic process	106	4.70902	0.000128486	TMEM189-UBE2V1, BTRC, MYLIP, CD2AP, KLHL3, CNOT4, G2E3, CUL5, RNF149, AUP1, DTL, UBR3, UBR1, SOCS5, PSMA4, PIAS2, FBXO11, RAD23B, FBXO40, UBE2V1, RFFL, ASB16, PSMA7, RBX1, ARIH1, UBE2D4, FBXW8, PSMB6, PSMB1, OTUD7B, HECTD3, FBXW2, FBXO47, FBXO45, HECTD1, NPLOC4, UFSP2, SHPRH, HACE1, CDC20, PCNP, SUGT1, CDC27, PSMB9, TULP4, UBA1, PSMC3, RNF2, UBE2G1, UCHL1, FBXL19, ZYG11A, PSMD2, KLHL21, PSMD3, US…	1755	574	13528	1.42348	0.412326	0.0112466	0.239368
GOTERM_BP_FAT	GO:0019941~modification-dependent protein catabolic process	106	4.70902	0.000128486	TMEM189-UBE2V1, BTRC, MYLIP, CD2AP, KLHL3, CNOT4, G2E3, CUL5, RNF149, AUP1, DTL, UBR3, UBR1, SOCS5, PSMA4, PIAS2, FBXO11, RAD23B, FBXO40, UBE2V1, RFFL, ASB16, PSMA7, RBX1, ARIH1, UBE2D4, FBXW8, PSMB6, PSMB1, OTUD7B, HECTD3, FBXW2, FBXO47, FBXO45, HECTD1, NPLOC4, UFSP2, SHPRH, HACE1, CDC20, PCNP, SUGT1, CDC27, PSMB9, TULP4, UBA1, PSMC3, RNF2, UBE2G1, UCHL1, FBXL19, ZYG11A, PSMD2, KLHL21, PSMD3, US…	1755	574	13528	1.42348	0.412326	0.0112466	0.239368
GOTERM_BP_FAT	GO:0051603~proteolysis involved in cellular protein catabolic process	110	4.88672	0.000129845	TMEM189-UBE2V1, BTRC, MYLIP, CD2AP, KLHL3, CNOT4, G2E3, CUL5, ERAP1, RNF149, AUP1, DTL, UBR3, UBR1, SOCS5, MYH9, PSMA4, PIAS2, FBXO11, RAD23B, FBXO40, UBE2V1, RFFL, ASB16, PSMA7, RBX1, UBE2D4, ARIH1, FBXW8, PSMB6, PSMB1, OTUD7B, HECTD3, FBXW2, FBXO47, FBXO45, HECTD1, NPLOC4, SHPRH, UFSP2, HACE1, CDC20, PCNP, SUGT1, CDC27, PSMB9, TULP4, UBA1, PSMC3, RNF2, UBE2G1, UCHL1, NFKB1, FBXL19, ZYG11A, PSMD…	1755	600	13528	1.41318	0.41562	0.0111294	0.241896
GOTERM_BP_FAT	GO:0009057~macromolecule catabolic process	137	6.08618	0.00014387	TMEM189-UBE2V1, BTRC, MYLIP, CD2AP, KLHL3, CNOT4, G2E3, CUL5, RBM8A, ERAP1, RNF149, AUP1, DTL, UBR3, UBR1, SOCS5, MYH9, PSMA4, YME1L1, PIAS2, FBXO11, RAD23B, FBXO40, UBE2V1, OAS2, HSPA1B, RFFL, PSMA7, ASB16, RBX1, UBE2D4, ARIH1, FBXW8, PSMB6, PSMB1, OTUD7B, HECTD3, FBXW2, FBXO47, NTHL1, FBXO45, HECTD1, AXIN1, NPLOC4, SHPRH, UFSP2, HACE1, SMG1, RNPS1, CDC20, PCNP, SUGT1, CDC27, ATM, PSMB9, DNASE2,…	1755	781	13528	1.35215	0.448566	0.0120741	0.26799
GOTERM_BP_FAT	GO:0051340~regulation of ligase activity	24	1.06619	0.000174259	CDK1, SMAD7, BTRC, CDC20, FEM1B, PSMA7, FEM1A, CDC27, PIN1, PSMB9, CCNB1, PSMF1, PSMB6, PSMB1, PLK1, PSMC3, PSMD11, PSMA4, PSMD2, PSMD3, PSME3, UBB, PSMD5, ZER1	1755	81	13528	2.28393	0.51372	0.014316	0.32451
GOTERM_BP_FAT	GO:0006605~protein targeting	48	2.13239	0.00018875	BID, XPO1, NUP98, YWHAZ, MTX3, ATP6AP1, HPS4, RASSF9, CALR, CDC37, SSR1, AKT1, IMMP2L, MACF1, SRPR, ZFYVE16, RPL11, RANBP2, NCKIPSD, TNPO1, KPNB1, FGF2, MYO6, TAOK2, FUT10, TP53, TOMM40, OPTN, ARNTL, YWHAE, MFN2, RPAIN, PRICKLE1, IPO7, GSK3B, TRPS1, IPO4, NUP205, EIF5AL1, PEX26, IPO5, YWHAQ, KPNA6, KPNA3, KPNA2, SRP9, TOB1, SSR3	1755	215	13528	1.72091	0.542021	0.0151957	0.35145
GOTERM_BP_FAT	GO:0009968~negative regulation of signal transduction	49	2.17681	0.000190676	TWSG1, EID2, IL6ST, ADRBK1, PAWR, CALR, PTEN, TRIB1, PIN1, AKT1, MEN1, IRAK3, PEG10, PPP2CA, CHST11, OTUD7B, HHIP, THBS1, PHLDA3, DNAJA3, AXIN1, PRKCA, PPP2R1A, DAND5, NF2, STMN3, SMAD7, SMAD6, RPH3AL, SKI, SOCS5, RGS17, GAS1, TAX1BP3, ADIPOQ, CISH, DDIT4, MFN2, ATXN1, CCND1, TSC1, AIDA, ATXN7, RGS5, RGS6, LRP6, PEBP1, SNX13, TOB1	1755	221	13528	1.70907	0.545657	0.0150567	0.355031
GOTERM_BP_FAT	GO:0031400~negative regulation of protein modification process	31	1.37717	0.000211163	FKBP1A, PSMA7, MEN1, PSMF1, BAK1, PSMB6, PSMB1, PPP2CA, PSMD2, PSMD3, PSMD5, FAM129A, IBTK, PRKCA, PPP2R1A, GTPBP4, NF2, SMAD7, SMAD6, CDC20, CDC27, YWHAE, PSMB9, TSC1, PSMD11, PSMC3, PSMA4, PEBP1, DNMT1, PSME3, UBB	1755	119	13528	2.00803	0.582584	0.0163493	0.393105
GOTERM_BP_FAT	GO:0006457~protein folding	41	1.82141	0.000267873	HSP90AB1, FKBP9, FKBP8, FKBP5, FKBP4, PPIL1, RP2, TTC9C, DNAJC10, VBP1, DNAJB12, FKBP1A, CALR, DNAJC30, PIN1, SH3GLB1, TOR1B, RANBP2, DNAJA3, HSPA8, FKBPL, HSP90AA1, FUT10, DNAJC21, CCT7, HSPBP1, ST13, TRAP1, PFDN2, ERP44, HSP90B1, CCT4, DNAJB9, PPIB, PFDN6, PPIA, PPIC, FKBP14, RUVBL2, DNAJB4, UGGT1	1755	177	13528	1.78553	0.669894	0.0203156	0.49843
GOTERM_BP_FAT	GO:0010604~positive regulation of macromolecule metabolic process	146	6.48601	0.000340524	MEF2C, IL6ST, BTRC, HOXD13, TLR3, RORA, FOXO3, CITED4, CBFB, GATA6, H2AFX, SUPT5H, SYK, BCL10, MYO6, PCBD2, RXRB, ARID1A, ARNTL, MED13, SIX4, ARID1B, AHR, HES1, EP300, MTF1, PSMA4, TFAP2B, MAPK9, PIAS2, CAMTA2, CNBP, HOXA13, BMPR2, SOX4, CALR, PSMA7, SRF, PIN1, PSMB6, PSMB1, DYRK2, NR1H4, DNAJA3, HNRNPAB, AXIN1, KLF7, SMAD9, IKZF2, SMAD7, KLF13, TAF8, MAML1, CREBBP, TNFRSF13C, CD276, SMAD4, ITGA2…	1755	857	13528	1.31319	0.755609	0.0252926	0.633204
GOTERM_BP_FAT	GO:0043623~cellular protein complex assembly	38	1.68814	0.000359105	XPO1, NUP98, EID2, TUBB2B, TUBB2A, DIAPH1, FKBP4, FKBP1A, CALR, PXN, TFAM, NDUFS5, TUBB, VMA21, COX18, TNPO1, KPNB1, TUBB3, TUBA1C, ARL2, HSP90AA1, SMAD4, BCS1L, SMAD1, MBD2, FLNA, DVL1, ADRM1, PFDN6, IPO7, IPO4, TPPP, NUP205, IPO5, MYH11, TUBD1, UNC13B, CACNA1A	1755	162	13528	1.80811	0.773698	0.0261847	0.667646
GOTERM_BP_FAT	GO:0045598~regulation of fat cell differentiation	9	0.399822	0.000384434	AKT1, PPARD, TAF8, ALMS1, WWTR1, LPIN1, ADIPOQ, FNDC3B, SOD2	1755	16	13528	4.3359	0.796219	0.0275214	0.714578
GOTERM_BP_FAT	GO:0031399~regulation of protein modification process	60	2.66548	0.000397375	IL6ST, BTRC, MEN1, MAP3K6, BAK1, PRKAR2A, APOA1, PSMD2, PSMD3, PSMD5, FAM129A, FGF2, SYK, PRKCA, IBTK, BCL10, CDK1, PPP2R1A, GTPBP4, CCDC88A, PKN1, CCND1, HIPK3, PSMA4, PEBP1, PSME3, UBB, ZER1, BMPR2, FKBP1A, FEM1B, PSMA7, FEM1A, PIN1, PSMF1, PSMB6, PSMB1, PPP2CA, DNAJA3, AXIN1, NF2, SMAD7, SMAD6, SMAD4, IGF1, CDC20, DOCK7, CDC27, YWHAE, ADIPOQ, PSMB9, CCNB1, TSC1, PSMC3, PSMD11, PLK1, DNMT1, TNK…	1755	295	13528	1.56778	0.806846	0.0279514	0.738549
GOTERM_BP_FAT	GO:0033365~protein localization in organelle	35	1.55486	0.000419091	BID, XPO1, YWHAZ, NUP98, MTX3, ATP6AP1, AKT1, IMMP2L, MACF1, MORC3, SRPR, NCKIPSD, RANBP2, TNPO1, FGF2, KPNB1, TP53, TOMM40, OPTN, ARNTL, DVL1, COG3, MFN2, RPAIN, PRICKLE1, IPO7, NUP205, IPO4, TRPS1, IPO5, KPNA6, KPNA3, KPNA2, SRP9, TOB1	1755	146	13528	1.84787	0.823448	0.0289645	0.77876
GOTERM_BP_FAT	GO:0008219~cell death	125	5.55309	0.000425741	MEF2C, ATP6AP1, FOXO3, CIAPIN1, CTNNBL1, BAK1, G2E3, RAD21, UNC5B, GATA6, FAS, CCAR1, BCL10, SLC33A1, ESPL1, OPTN, STK4, BCL2L11, AHR, DDIT4, TNS4, EP300, TIAL1, MAPK8, PDCD6IP, NEK6, TRAF1, MCL1, TNFRSF12A, RFFL, STK17A, PTRH2, DIDO1, SLC11A2, PEG10, DYRK2, TRAF4, DNAJA3, AXIN1, TRAF3, VAV3, TAOK2, TRIO, ALMS1, GAS1, ATM, FXR1, NCKAP1, CIDEC, TRAF3IP2, DNASE2, BFAR, UBA1, RHOT2, CACNA1A, GRK1, S…	1755	719	13528	1.3401	0.828241	0.0289342	0.791071
GOTERM_BP_FAT	GO:0031647~regulation of protein stability	15	0.666371	0.000549415	GTPBP4, SMAD7, HPS4, APTX, SOX4, AURKA, CALR, PTEN, UBE2B, FLNA, COG3, ASGR2, APOA1, MORC3, DNAJA3	1755	42	13528	2.75295	0.897054	0.0365853	1.01976
GOTERM_BP_FAT	GO:0016265~death	125	5.55309	0.000556489	MEF2C, ATP6AP1, FOXO3, CIAPIN1, CTNNBL1, BAK1, G2E3, RAD21, UNC5B, GATA6, FAS, CCAR1, BCL10, SLC33A1, ESPL1, OPTN, STK4, BCL2L11, AHR, DDIT4, TNS4, EP300, TIAL1, MAPK8, PDCD6IP, NEK6, TRAF1, MCL1, TNFRSF12A, RFFL, STK17A, PTRH2, DIDO1, SLC11A2, PEG10, DYRK2, TRAF4, DNAJA3, AXIN1, TRAF3, VAV3, TAOK2, TRIO, ALMS1, GAS1, ATM, FXR1, NCKAP1, CIDEC, TRAF3IP2, DNASE2, BFAR, UBA1, RHOT2, CACNA1A, GRK1, S…	1755	724	13528	1.33085	0.900025	0.0364612	1.03282
GOTERM_BP_FAT	GO:0070227~lymphocyte apoptosis	7	0.310973	0.000620276	TRAF3IP2, AKT1, BAK1, FAS, MYC, DNAJA3, BCL2L11	1755	10	13528	5.39578	0.923225	0.0399252	1.15056
GOTERM_BP_FAT	GO:0010563~negative regulation of phosphorus metabolic process	16	0.710795	0.000763853	PRKCA, IBTK, PPP2R1A, NF2, SMAD7, SMAD6, FKBP1A, YWHAE, MEN1, ATXN1, BAK1, DYNLL1, ATXN7, PPP2CA, PEBP1, FAM129A	1755	48	13528	2.56942	0.957628	0.0481947	1.41509
GOTERM_BP_FAT	GO:0045936~negative regulation of phosphate metabolic process	16	0.710795	0.000763853	PRKCA, IBTK, PPP2R1A, NF2, SMAD7, SMAD6, FKBP1A, YWHAE, MEN1, ATXN1, BAK1, DYNLL1, ATXN7, PPP2CA, PEBP1, FAM129A	1755	48	13528	2.56942	0.957628	0.0481947	1.41509
GOTERM_BP_FAT	GO:0051260~protein homooligomerization	25	1.11062	0.000843846	SMARCAD1, HSD17B10, ATL3, TP63, CDH1, TRIM72, GPX3, FAS, SLC1A1, BCL10, SHMT1, NACC1, NACC2, PCBD2, SCUBE3, ALDH5A1, SKI, PFKM, ITPR3, ADIPOQ, SOD2, RAD51, PEBP1, ATG16L1, SPAST	1755	95	13528	2.02849	0.969574	0.0523123	1.56219
GOTERM_BP_FAT	GO:0051252~regulation of RNA metabolic process	279	12.3945	0.000899077	MEF2C, HOXD13, SYNCRIP, RORA, SIN3B, ZNF776, SIN3A, ZNF772, CREB3L2, PATZ1, SUPT5H, PITX1, ZNF101, ZNF43, ZNF641, IKBKAP, PCBD2, RXRB, BARHL1, YY1, MECP2, ZNF793, MED13, MED19, HES1, MTF1, MED16, HES4, RPS14, SERBP1, HES2, ZNF785, PIAS2, MYBBP1A, TRAPPC2, ZNF132, HOXA13, ZNF619, MYBL1, CALR, ZNF616, PFN1, ZNF224, ZNF223, ZNF74, ZNF124, ARNTL2, ZNF70, NR1H4, HNRNPAB, ZNF69, KLF7, IKZF3, IKZF2, SMA…	1755	1813	13528	1.18621	0.975794	0.0548212	1.66363
GOTERM_BP_FAT	GO:0008633~activation of pro-apoptotic gene products	10	0.444247	0.00103031	BID, AKT1, TNFRSF10B, DYNLL1, FASLG, MAPK8, FAS, MYC, DEDD2, BCL2L11	1755	22	13528	3.50376	0.985942	0.0616673	1.90425
GOTERM_BP_FAT	GO:0010558~negative regulation of macromolecule biosynthetic process	97	4.3092	0.00103338	MEF2C, PPARA, PPARD, TP63, CBX2, NFKB1, PAWR, CBFA2T2, CBX5, CDT1, MEN1, SAP30, EIF4EBP1, SIN3B, HOXC8, SIN3A, EIF4EBP2, SIK1, BCL7A, SUPT5H, FGF2, DEDD2, ATF7IP, KHDRBS1, PRKCA, CDC6, GTPBP4, GABPA, TP53, MECP2, SPEN, RBBP7, MBD2, PKIA, PURB, SUZ12, HES1, PA2G4, EIF2AK1, TIMELESS, RPS14, HES2, NAB1, MDM2, LCOR, CUX1, SRP9, KDM6B, HMGB1, BTAF1, EID2, ITGB3, CALR, ZNF174, HIC2, TRIM66, SUMO1, HAND…	1755	547	13528	1.36691	0.98612	0.0609639	1.90987
GOTERM_BP_FAT	GO:0051443~positive regulation of ubiquitin-protein ligase activity	20	0.888494	0.00113434	CDK1, BTRC, CDC20, PSMA7, CDC27, PIN1, PSMB9, CCNB1, PSMF1, PSMB6, PSMB1, PLK1, PSMC3, PSMD11, PSMA4, PSMD2, PSMD3, PSME3, UBB, PSMD5	1755	70	13528	2.20236	0.990863	0.065786	2.09461
GOTERM_BP_FAT	GO:0006915~apoptosis	105	4.66459	0.00113606	MEF2C, FOXO3, CIAPIN1, CTNNBL1, BAK1, G2E3, RAD21, UNC5B, GATA6, FAS, CCAR1, BCL10, ESPL1, STK4, BCL2L11, AHR, DDIT4, TNS4, EP300, TIAL1, MAPK8, PDCD6IP, NEK6, TRAF1, MCL1, TNFRSF12A, RFFL, STK17A, PTRH2, DIDO1, SLC11A2, PEG10, DYRK2, TRAF4, DNAJA3, AXIN1, TRAF3, VAV3, TAOK2, TRIO, ALMS1, ATM, FXR1, NCKAP1, CIDEC, TRAF3IP2, DNASE2, BFAR, RHOT2, GRK1, STEAP3, E2F2, PPARD, NUAK2, SGPP1, FASTK, TP63…	1755	602	13528	1.34446	0.990928	0.0649723	2.09774
GOTERM_BP_FAT	GO:0042326~negative regulation of phosphorylation	15	0.666371	0.00119106	PRKCA, IBTK, PPP2R1A, NF2, SMAD7, SMAD6, FKBP1A, MEN1, ATXN1, BAK1, DYNLL1, ATXN7, PPP2CA, PEBP1, FAM129A	1755	45	13528	2.56942	0.992776	0.0670854	2.19824
GOTERM_BP_FAT	GO:0012501~programmed cell death	106	4.70902	0.00129092	MEF2C, FOXO3, CIAPIN1, CTNNBL1, BAK1, G2E3, RAD21, UNC5B, GATA6, FAS, CCAR1, BCL10, ESPL1, STK4, BCL2L11, AHR, DDIT4, TNS4, EP300, TIAL1, MAPK8, PDCD6IP, NEK6, TRAF1, MCL1, TNFRSF12A, RFFL, STK17A, PTRH2, DIDO1, SLC11A2, PEG10, DYRK2, TRAF4, DNAJA3, AXIN1, TRAF3, VAV3, TAOK2, TRIO, ALMS1, GAS1, ATM, FXR1, NCKAP1, CIDEC, TRAF3IP2, DNASE2, BFAR, RHOT2, GRK1, STEAP3, E2F2, PPARD, NUAK2, SGPP1, FASTK…	1755	611	13528	1.33728	0.995223	0.0715347	2.38046
GOTERM_BP_FAT	GO:0033554~cellular response to stress	99	4.39805	0.00144492	XRCC2, CLPB, FOXO3, AQP2, MAP3K6, MAP3K4, RAD21, COL4A3BP, INSIG1, H2AFX, GNL1, SYK, POLL, MYO6, POLI, DTL, POLG, POLE, PPP1CB, ESCO2, RPAIN, TIMELESS, MAPK9, MAPK8, WNT5A, RAD23B, HMGB1, MRE11A, MRPS11, BMPR2, DUSP10, CHEK1, TTC5, PXN, RBX1, SLC11A2, DYRK2, POLQ, NTHL1, SHPRH, MAP2K4, SMG1, ATAD5, WRN, ATM, ATP7A, SMC1A, ATG16L1, CHAF1A, PARP2, CHAF1B, CLSPN, NUAK2, UVRAG, TP63, MEN1, MCM7, HMOX…	1755	566	13528	1.34826	0.997476	0.0786769	2.66082
GOTERM_BP_FAT	GO:0009890~negative regulation of biosynthetic process	100	4.44247	0.00147158	MEF2C, CBX2, CBX5, EIF4EBP1, HOXC8, SIN3B, EIF4EBP2, SIN3A, SUPT5H, BCL7A, GTPBP4, GABPA, MECP2, PKIA, HES1, SUZ12, PA2G4, EIF2AK1, TIMELESS, RPS14, HES2, HMGB1, EID2, ITGB3, CALR, TRIM66, NR1H4, HNRNPAB, NKRF, SMAD7, KLF10, SMAD4, CD276, SKI, FOXP1, HDAC1, TSC1, MLX, RNF2, TRPS1, DNMT1, HIVEP1, CACNA1A, PPARA, PPARD, TP63, NFKB1, PAWR, CBFA2T2, CDT1, MEN1, SAP30, SIK1, FGF2, DEDD2, PRKCA, KHDRBS…	1755	573	13528	1.34525	0.99774	0.0790319	2.70928
GOTERM_BP_FAT	GO:0051170~nuclear import	23	1.02177	0.00157711	XPO1, NUP98, ATP6AP1, TP53, ARNTL, HNRNPA1, AKT1, RPAIN, PRICKLE1, IPO7, NUP205, IPO4, TRPS1, IPO5, KPNA6, NCKIPSD, RANBP2, KPNA3, KPNA2, FGF2, TNPO1, KPNB1, TOB1	1755	88	13528	2.01466	0.99854	0.0833798	2.90087
GOTERM_BP_FAT	GO:0031327~negative regulation of cellular biosynthetic process	98	4.35362	0.00159156	MEF2C, PPARA, PPARD, TP63, CBX2, NFKB1, PAWR, CBFA2T2, CBX5, CDT1, MEN1, SAP30, EIF4EBP1, SIN3B, HOXC8, SIN3A, EIF4EBP2, SIK1, BCL7A, SUPT5H, FGF2, DEDD2, ATF7IP, KHDRBS1, PRKCA, CDC6, GTPBP4, GABPA, TP53, MECP2, SPEN, RBBP7, MBD2, PKIA, PURB, SUZ12, HES1, PA2G4, EIF2AK1, TIMELESS, RPS14, HES2, NAB1, MDM2, LCOR, CUX1, SRP9, KDM6B, HMGB1, BTAF1, EID2, CALR, ZNF174, HIC2, TRIM66, SUMO1, HAND1, RNF1…	1755	561	13528	1.34654	0.998625	0.0830518	2.92708
GOTERM_BP_FAT	GO:0001933~negative regulation of protein amino acid phosphorylation	12	0.533096	0.00160072	PRKCA, IBTK, MEN1, BAK1, PPP2R1A, NF2, SMAD7, PPP2CA, SMAD6, PEBP1, FKBP1A, FAM129A	1755	32	13528	2.8906	0.998677	0.0824713	2.9437
GOTERM_BP_FAT	GO:0031401~positive regulation of protein modification process	40	1.77699	0.00162944	IL6ST, BTRC, BMPR2, FKBP1A, PSMA7, PIN1, MEN1, PSMF1, PSMB6, PSMB1, PSMD2, PSMD3, PSMD5, FAM129A, FGF2, DNAJA3, AXIN1, SYK, PRKCA, BCL10, CDK1, SMAD7, SMAD4, IGF1, DOCK7, CDC20, CDC27, ADIPOQ, PSMB9, CCNB1, CCND1, PSMC3, PSMD11, PLK1, PSMA4, DNMT1, PSME3, UBB, TNK2, BMPR1A	1755	187	13528	1.64883	0.998825	0.0828583	2.99574
GOTERM_BP_FAT	GO:0034504~protein localization in nucleus	24	1.06619	0.00169996	XPO1, NUP98, ATP6AP1, TP53, ARNTL, DVL1, AKT1, RPAIN, PRICKLE1, MORC3, IPO7, NUP205, IPO4, TRPS1, IPO5, KPNA6, NCKIPSD, RANBP2, KPNA3, KPNA2, FGF2, TNPO1, KPNB1, TOB1	1755	94	13528	1.96807	0.999123	0.0852436	3.12346
GOTERM_BP_FAT	GO:0031328~positive regulation of cellular biosynthetic process	116	5.15327	0.00181904	MEF2C, HOXD13, TLR3, RORA, FOXO3, CITED4, CBFB, GATA6, SUPT5H, DDAH1, SYK, BCL10, MYO6, PCBD2, RXRB, ARID1A, ARNTL, MED13, SIX4, ARID1B, AHR, HES1, EP300, MTF1, TFAP2B, PIAS2, CAMTA2, CNBP, HOXA13, SOX4, CALR, SRF, NPM1, DYRK2, NR1H4, HNRNPAB, KLF7, IKZF2, SMAD9, KLF13, TAF8, MAML1, CREBBP, TNFRSF13C, SMAD4, ARPP19, CD276, ITGA2, SMAD1, DDX5, SREBF2, RNF4, HDAC1, DYRK1B, HIVEP3, KLF2, HSP90AB1, P…	1755	685	13528	1.30534	0.999464	0.0898564	3.33877
GOTERM_BP_FAT	GO:0050821~protein stabilization	11	0.488672	0.00186755	COG3, GTPBP4, APOA1, MORC3, SMAD7, HPS4, SOX4, CALR, UBE2B, DNAJA3, FLNA	1755	28	13528	3.02825	0.999562	0.0910568	3.42634
GOTERM_BP_FAT	GO:0051351~positive regulation of ligase activity	20	0.888494	0.00194287	CDK1, BTRC, CDC20, PSMA7, CDC27, PIN1, PSMB9, CCNB1, PSMF1, PSMB6, PSMB1, PLK1, PSMC3, PSMD11, PSMA4, PSMD2, PSMD3, PSME3, UBB, PSMD5	1755	73	13528	2.11185	0.999679	0.0934559	3.56217
GOTERM_BP_FAT	GO:0006974~response to DNA damage stimulus	69	3.0653	0.00204073	CLSPN, XRCC2, UVRAG, TP63, FOXO3, MEN1, RAD21, MCM7, NSMCE1, AEN, HMOX1, H2AFX, GNL1, FANCC, POLL, CDK1, POLI, MYO6, BRCC3, POLG, DTL, POLE, TP53, PAPD7, APTX, UBE2B, PPP1CB, ESCO2, RAD51, RECQL, CCND1, RPAIN, BTG2, HIPK1, TIMELESS, RUVBL2, REV3L, RAD23B, HMGB1, XIAP, MRE11A, WRNIP1, MRPS11, CHEK1, TTC5, RBX1, RPA2, SUMO1, DYRK2, POLQ, PHLDA3, NTHL1, APEX1, TERF2, SHPRH, MSH3, SMG1, ATAD5, WRN, S…	1755	373	13528	1.42593	0.999786	0.0968088	3.73838
GOTERM_BP_FAT	GO:0051437~positive regulation of ubiquitin-protein ligase activity during mitotic cell cycle	19	0.844069	0.00206038	CDK1, BTRC, CDC20, PSMA7, CDC27, PSMB9, CCNB1, PSMF1, PSMB6, PSMB1, PLK1, PSMC3, PSMD11, PSMA4, PSMD2, PSMD3, PSME3, UBB, PSMD5	1755	68	13528	2.15378	0.999803	0.0965898	3.77372
GOTERM_BP_FAT	GO:0032270~positive regulation of cellular protein metabolic process	47	2.08796	0.00215597	IL6ST, BTRC, BMPR2, FKBP1A, PSMA7, PIN1, AKT1, MEN1, PSMF1, PSMB6, PSMB1, PSMD2, PSMD3, PSMD5, FAM129A, THBS1, FGF2, DNAJA3, AXIN1, SYK, PRKCA, BCL10, CDK1, SMAD7, SMAD4, IGF1, ITGA2, DOCK7, CDC20, CDK4, CDC27, ADIPOQ, PSMB9, CCNB1, CCND1, EP300, PSMC3, PSMD11, PLK1, PSMA4, EIF5AL1, MDM2, DNMT1, PSME3, UBB, TNK2, BMPR1A	1755	233	13528	1.55489	0.999867	0.0997163	3.94548
GOTERM_BP_FAT	GO:0051253~negative regulation of RNA metabolic process	67	2.97645	0.00235058	MEF2C, PPARA, PPARD, TP63, NFKB1, CBX2, PAWR, CBFA2T2, CBX5, MEN1, SAP30, HOXC8, SIN3B, SIN3A, SIK1, SUPT5H, FGF2, ATF7IP, GABPA, MECP2, TP53, SPEN, RBBP7, MBD2, PKIA, PURB, SUZ12, HES1, PA2G4, RPS14, MDM2, CUX1, LCOR, KDM6B, HMGB1, CALR, ZNF174, HIC2, TRIM66, HAND1, NPM1, GATAD2A, NR1H4, SIM2, ETV3, ENO1, HNRNPAB, ZBTB7A, WDTC1, SMAD7, KLF10, TRIM28, SMAD4, SKI, PHF12, WWTR1, FOXP1, STAT3, HDAC1…	1755	362	13528	1.42667	0.999941	0.107034	4.29429
GOTERM_BP_FAT	GO:0043161~proteasomal ubiquitin-dependent protein catabolic process	25	1.11062	0.00240175	RAD23B, PSMA7, EDEM1, CD2AP, PSMF1, PSMB6, PSMB1, PSMD2, PSMD3, PSMD5, CDK1, NPLOC4, PCNP, CDC20, CDC27, PSMB9, CCNB1, HSP90B1, PSMD11, PSMC3, PSMA4, PSME3, FAF1, UBB, TBL1X	1755	102	13528	1.88928	0.999952	0.108049	4.38579
GOTERM_BP_FAT	GO:0010498~proteasomal protein catabolic process	25	1.11062	0.00240175	RAD23B, PSMA7, EDEM1, CD2AP, PSMF1, PSMB6, PSMB1, PSMD2, PSMD3, PSMD5, CDK1, NPLOC4, PCNP, CDC20, CDC27, PSMB9, CCNB1, HSP90B1, PSMD11, PSMC3, PSMA4, PSME3, FAF1, UBB, TBL1X	1755	102	13528	1.88928	0.999952	0.108049	4.38579
GOTERM_BP_FAT	GO:0045892~negative regulation of transcription, DNA-dependent	66	2.93203	0.00243834	MEF2C, PPARA, PPARD, TP63, NFKB1, CBX2, PAWR, CBFA2T2, CBX5, MEN1, SAP30, HOXC8, SIN3B, SIN3A, SIK1, SUPT5H, FGF2, ATF7IP, GABPA, MECP2, TP53, SPEN, RBBP7, MBD2, PKIA, PURB, SUZ12, HES1, PA2G4, RPS14, MDM2, CUX1, LCOR, KDM6B, HMGB1, CALR, ZNF174, HIC2, TRIM66, HAND1, GATAD2A, NR1H4, SIM2, ETV3, ENO1, HNRNPAB, ZBTB7A, WDTC1, SMAD7, KLF10, TRIM28, SMAD4, SKI, PHF12, WWTR1, FOXP1, STAT3, HDAC1, TRPS…	1755	356	13528	1.42906	0.999959	0.108429	4.45118
GOTERM_BP_FAT	GO:0006355~regulation of transcription, DNA-dependent	269	11.9502	0.00264885	MEF2C, HOXD13, RORA, SIN3B, ZNF776, SIN3A, ZNF772, CREB3L2, PATZ1, SUPT5H, PITX1, ZNF101, ZNF43, ZNF641, IKBKAP, PCBD2, RXRB, BARHL1, YY1, MECP2, ZNF793, MED13, MED19, HES1, MTF1, MED16, HES4, RPS14, HES2, ZNF785, PIAS2, MYBBP1A, TRAPPC2, ZNF132, HOXA13, ZNF619, MYBL1, CALR, ZNF616, PFN1, ZNF224, ZNF223, ZNF74, ZNF124, ARNTL2, ZNF70, NR1H4, HNRNPAB, ZNF69, KLF7, IKZF3, IKZF2, SMAD9, SMAD7, KLF13,…	1755	1773	13528	1.1695	0.999983	0.115993	4.82655
GOTERM_BP_FAT	GO:0010648~negative regulation of cell communication	49	2.17681	0.0026634	TWSG1, EID2, IL6ST, ADRBK1, PAWR, CALR, PTEN, TRIB1, PIN1, AKT1, MEN1, IRAK3, PEG10, PPP2CA, CHST11, OTUD7B, HHIP, THBS1, PHLDA3, DNAJA3, AXIN1, PRKCA, PPP2R1A, DAND5, NF2, STMN3, SMAD7, SMAD6, RPH3AL, SKI, SOCS5, RGS17, GAS1, TAX1BP3, ADIPOQ, CISH, DDIT4, MFN2, ATXN1, CCND1, TSC1, AIDA, ATXN7, RGS5, RGS6, LRP6, PEBP1, SNX13, TOB1	1755	248	13528	1.523	0.999984	0.115375	4.85244
GOTERM_BP_FAT	GO:0006606~protein import into nucleus	22	0.977343	0.00271448	XPO1, NUP98, ATP6AP1, TP53, ARNTL, AKT1, RPAIN, PRICKLE1, IPO7, NUP205, IPO4, TRPS1, IPO5, KPNA6, NCKIPSD, RANBP2, KPNA3, KPNA2, FGF2, TNPO1, KPNB1, TOB1	1755	86	13528	1.97188	0.999987	0.116242	4.94327
GOTERM_BP_FAT	GO:0022613~ribonucleoprotein complex biogenesis	38	1.68814	0.00274651	EIF6, SURF6, NHP2L1, SNRPD3, SNRPD1, MINA, EBNA1BP2, WDR55, RPS28, DDX23, NPM1, RPL11, RPL7A, FTSJ1, GEMIN6, FTSJ3, RPS24, CLNS1A, GTPBP4, TSR1, EXOSC6, SF1, EXOSC2, RPL24, HEATR1, RRP9, MBNL1, SF3A3, PHAX, DDX56, PA2G4, RPS16, TSC1, RPS14, RPS15, CELF1, POP4, SNRPE	1755	180	13528	1.6273	0.999989	0.116331	5.0002
GOTERM_BP_FAT	GO:0009891~positive regulation of biosynthetic process	116	5.15327	0.00295955	MEF2C, HOXD13, TLR3, RORA, FOXO3, CITED4, CBFB, GATA6, SUPT5H, DDAH1, SYK, BCL10, MYO6, PCBD2, RXRB, ARID1A, ARNTL, MED13, SIX4, ARID1B, AHR, HES1, EP300, MTF1, TFAP2B, PIAS2, CAMTA2, CNBP, HOXA13, SOX4, CALR, SRF, NPM1, DYRK2, NR1H4, HNRNPAB, KLF7, IKZF2, SMAD9, KLF13, TAF8, MAML1, CREBBP, TNFRSF13C, SMAD4, ARPP19, CD276, ITGA2, SMAD1, DDX5, SREBF2, RNF4, HDAC1, DYRK1B, HIVEP3, KLF2, HSP90AB1, P…	1755	695	13528	1.28656	0.999995	0.123525	5.378
GOTERM_BP_FAT	GO:0051247~positive regulation of protein metabolic process	48	2.13239	0.00297186	IL6ST, BTRC, BMPR2, EGLN2, FKBP1A, PSMA7, PIN1, AKT1, MEN1, PSMF1, PSMB6, PSMB1, PSMD2, PSMD3, PSMD5, FAM129A, THBS1, FGF2, DNAJA3, AXIN1, SYK, PRKCA, BCL10, CDK1, SMAD7, SMAD4, IGF1, ITGA2, DOCK7, CDC20, CDK4, CDC27, ADIPOQ, PSMB9, CCNB1, CCND1, EP300, PSMC3, PSMD11, PLK1, PSMA4, EIF5AL1, MDM2, DNMT1, PSME3, UBB, TNK2, BMPR1A	1755	243	13528	1.52262	0.999996	0.122772	5.3998
GOTERM_BP_FAT	GO:0006333~chromatin assembly or disassembly	29	1.28832	0.00305932	HIST1H2AB, HIST1H2AC, HIST2H2AA3, ARID4B, HIST1H2AE, CBX2, H1FX, TSPYL4, CBX6, CBX5, HIST1H2BN, NPM1, HIST1H4C, H2AFX, HIRIP3, HIST3H2BB, CHD4, HIST1H1E, SHPRH, HIST1H2BD, HMGA1, MSL3, HIST1H1T, SMARCA5, HIST1H2AH, H3F3B, HIST1H3D, H3F3C, HIST1H2AM, CHAF1A, CHAF1B	1755	127	13528	1.76015	0.999997	0.124911	5.55444
GOTERM_BP_FAT	GO:0016481~negative regulation of transcription	81	3.5984	0.00316216	MEF2C, PPARA, PPARD, TP63, NFKB1, CBX2, PAWR, CBFA2T2, CBX5, MEN1, SAP30, HOXC8, SIN3B, SIN3A, SUPT5H, BCL7A, SIK1, FGF2, DEDD2, ATF7IP, KHDRBS1, GABPA, MECP2, TP53, SPEN, RBBP7, MBD2, PKIA, PURB, SUZ12, HES1, PA2G4, TIMELESS, RPS14, NAB1, HES2, MDM2, CUX1, LCOR, KDM6B, BTAF1, HMGB1, EID2, CALR, ZNF174, HIC2, SUMO1, TRIM66, HAND1, GATAD2A, NR1H4, SIM2, ETV3, ENO1, HNRNPAB, NKRF, ZBTB7A, WDTC1, NA…	1755	459	13528	1.36028	0.999998	0.127581	5.73599
GOTERM_BP_FAT	GO:0006259~DNA metabolic process	88	3.90937	0.00317167	CLSPN, XRCC2, UVRAG, MCM10, CDT1, PRIM1, MEN1, RAD21, MCM7, NSMCE1, PRIM2, H2AFX, E4F1, MYC, FANCC, POLL, ATF7IP, CDC6, C5ORF51, POLI, RBBP4, BRCC3, CCDC88A, POLG, DTL, CYCS, POLE, TP53, PAPD7, APTX, PAPD5, RBBP7, MCM3, HMGA1, UBE2B, ESCO2, RAD51, RECQL, RPAIN, BTG2, RRM1, RUVBL2, KPNA2, REV3L, ING5, RAD23B, HMGB1, NUP98, WRNIP1, MRE11A, CHEK1, TTC5, TK1, RBX1, RPA2, TFAM, SUMO1, TYMP, BCL11B, GA…	1755	506	13528	1.34057	0.999998	0.126708	5.75277
GOTERM_BP_FAT	GO:0034728~nucleosome organization	23	1.02177	0.00332471	HIST1H2AB, HIST1H2AC, HIST2H2AA3, HIST1H1E, SHPRH, HIST1H2BD, HIST1H2AE, ARID1A, H1FX, TSPYL4, HMGA1, HIST1H1T, HIST1H2BN, NPM1, SMARCA5, HIST1H2AH, H3F3B, HIST1H3D, HIST1H4C, H2AFX, H3F3C, HIST1H2AM, HIST3H2BB, CHAF1A, CHAF1B	1755	93	13528	1.90634	0.999999	0.131149	6.02226
GOTERM_BP_FAT	GO:0018210~peptidyl-threonine modification	9	0.399822	0.00334076	PRKCA, GALNT2, PDPK1, SBK1, HIPK3, TGFBR2, MAPK8, ADRBK1, CAD	1755	21	13528	3.30354	0.999999	0.1305	6.05049
GOTERM_BP_FAT	GO:0051439~regulation of ubiquitin-protein ligase activity during mitotic cell cycle	19	0.844069	0.00344034	CDK1, BTRC, CDC20, PSMA7, CDC27, PSMB9, CCNB1, PSMF1, PSMB6, PSMB1, PLK1, PSMC3, PSMD11, PSMA4, PSMD2, PSMD3, PSME3, UBB, PSMD5	1755	71	13528	2.06277	0.999999	0.132875	6.22541
GOTERM_BP_FAT	GO:0006607~NLS-bearing substrate import into nucleus	7	0.310973	0.00358122	TRPS1, IPO5, KPNA6, NCKIPSD, KPNA3, KPNA2, KPNB1	1755	13	13528	4.1506	1	0.136664	6.47235
GOTERM_BP_FAT	GO:0000059~protein import into nucleus, docking	8	0.355398	0.00361457	XPO1, NUP98, IPO7, IPO4, NUP205, IPO5, KPNB1, TNPO1	1755	17	13528	3.62742	1	0.136592	6.53072
GOTERM_BP_FAT	GO:0060070~Wnt receptor signaling pathway through beta-catenin	8	0.355398	0.00361457	CCND1, GSK3B, LRP6, SOX4, TBL1X, UBE2B, DVL1, AXIN1	1755	17	13528	3.62742	1	0.136592	6.53072
GOTERM_BP_FAT	GO:0007051~spindle organization	14	0.621946	0.00366819	HAUS3, CEP120, PRC1, HAUS1, AURKA, ESPL1, MYH9, RCC1, SMC3, TUBB, ZWINT, CKS2, SMC1A, DYNC1H1	1755	45	13528	2.39813	1	0.137227	6.62448
GOTERM_BP_FAT	GO:0006357~regulation of transcription from RNA polymerase II promoter	120	5.33096	0.00367376	MEF2C, CNOT2, HOXD13, CBX2, RORA, FOXO3, CBFB, HOXC6, HOXC8, SIN3A, SMARCD2, GATA6, SUPT5H, IKBKAP, MYO6, RXRB, YY1, GABPA, MECP2, ARNTL, MED13, SIX4, PKIA, AHR, SUZ12, MED19, HES1, EP300, MTF1, MED16, TIAL1, RPS14, SMARCA5, TFAP2B, HMGB1, CAMTA2, CNBP, HOXA13, ONECUT3, CALR, SRF, PFN1, SNF8, TEF, NR1H4, TFDP1, IKZF3, KLF7, IKZF2, SMAD7, KLF13, MAML1, KLF10, CREBBP, SMAD4, SKI, SMAD1, FOXP1, SREB…	1755	727	13528	1.27234	1	0.136194	6.63422
GOTERM_BP_FAT	GO:0000226~microtubule cytoskeleton organization	32	1.42159	0.00389547	HAUS3, CEP120, PRC1, NEK2, HAUS1, AURKA, RCC1, TTL, HOOK3, KIF2C, TUBB, MACF1, NPM1, CLASP1, PAFAH1B1, DYNC1H1, PPP4C, STMN3, MAP1B, DOCK7, ESPL1, MYH9, UBE2B, TUBGCP2, SMC3, ZWINT, FGFR1OP, TPPP, CKS2, SMC1A, SPAST, RANBP10	1755	147	13528	1.67799	1	0.14254	7.02096
GOTERM_BP_FAT	GO:0006366~transcription from RNA polymerase II promoter	46	2.04354	0.00402185	E2F2, PPARA, POLR2F, E2F3, POLR2E, POLR2L, POLR2I, BMPR2, HCFC1, MYEF2, HOXD13, NFKB1, CBFB, TMF1, GTF2E1, MAZ, HAND1, GTF2A1, GATA3, NFAT5, BTF3, MLLT1, SUPT5H, APEX1, MYC, TRIP11, RUNX3, KAT2A, CEBPB, KLF13, TRIM29, GABPA, CDK9, CREB5, MED13, AHR, MSL3, ADRM1, MED7, MED16, TRPS1, TCEB2, TCEB3, NFE2L1, NFIC, LCOR	1755	234	13528	1.5153	1	0.145537	7.24074
GOTERM_BP_FAT	GO:0045934~negative regulation of nucleobase, nucleoside, nucleotide and nucleic acid metabolic process	88	3.90937	0.00442757	MEF2C, PPARA, PPARD, TP63, NFKB1, CBX2, PAWR, CBFA2T2, CBX5, CDT1, MEN1, SAP30, HOXC8, SIN3B, SIN3A, SUPT5H, BCL7A, SIK1, FGF2, DEDD2, ATF7IP, KHDRBS1, CDC6, GTPBP4, GABPA, MECP2, TP53, SPEN, RBBP7, MBD2, PKIA, PURB, SUZ12, HES1, PA2G4, TIMELESS, RPS14, HES2, NAB1, MDM2, CUX1, LCOR, KDM6B, BTAF1, HMGB1, EID2, CALR, ZNF174, HIC2, SUMO1, TRIM66, HAND1, NPM1, GATAD2A, NR1H4, TERF2, SIM2, ETV3, ENO1,…	1755	512	13528	1.32486	1	0.157655	7.94295
GOTERM_BP_FAT	GO:0010741~negative regulation of protein kinase cascade	12	0.533096	0.00456539	MEN1, AKT1, PPP2R1A, AIDA, NF2, PPP2CA, OTUD7B, PEBP1, PHLDA3, ADIPOQ, PTEN, DNAJA3	1755	36	13528	2.56942	1	0.160778	8.18034
GOTERM_BP_FAT	GO:0006334~nucleosome assembly	21	0.932919	0.00460758	HIST1H2AB, HIST1H2AC, HIST2H2AA3, HIST1H1E, SHPRH, HIST1H2BD, HIST1H2AE, H1FX, TSPYL4, HIST1H1T, HIST1H2BN, NPM1, SMARCA5, HIST1H2AH, H3F3B, HIST1H4C, H2AFX, HIST1H3D, H3F3C, HIST1H2AM, CHAF1A, HIST3H2BB, CHAF1B	1755	84	13528	1.92707	1	0.160779	8.25291
GOTERM_BP_FAT	GO:0007018~microtubule-based movement	26	1.15504	0.00472495	KIFC1, DNAH9, TUBB2B, KIF27, TUBB2A, DNAH17, UCHL1, KLC2, KIF2C, TUBB, MACF1, KIF6, PAFAH1B1, DYNC1H1, HAP1, TUBA1C, TUBB3, KIF5B, KIF18B, BICD2, KIF1C, KIF1A, KIF1B, TUBD1, RHOT2, KIF20A	1755	113	13528	1.77358	1	0.16316	8.45447
GOTERM_BP_FAT	GO:0043254~regulation of protein complex assembly	22	0.977343	0.00482406	ATF7IP, TRIOBP, HMGB1, ACTR3B, SMAD6, MAP1B, HCFC1, SRF, CAPZB, AHR, CDC42, SUMO1, EIF4EBP1, ARPC2, GSK3B, TPPP, TMSB4X, FAF1, MAPRE1, MDN1, RASA1, ADD1	1755	90	13528	1.88424	1	0.164921	8.62433
GOTERM_BP_FAT	GO:0017038~protein import	29	1.28832	0.00484612	BID, XPO1, YWHAZ, NUP98, MTX3, ATP6AP1, AKT1, IMMP2L, NCKIPSD, RANBP2, TNPO1, FGF2, KPNB1, TP53, TOMM40, ARNTL, MFN2, RPAIN, PRICKLE1, IPO7, NUP205, IPO4, TRPS1, IPO5, PEX26, KPNA6, KPNA3, KPNA2, TOB1	1755	131	13528	1.70641	1	0.164261	8.66211
GOTERM_BP_FAT	GO:0048193~Golgi vesicle transport	29	1.28832	0.00484612	CLTA, SEC24A, STX7, ATL3, CLTC, TMED10, DOPEY2, RAB6B, EXOC5, SAR1B, SAR1A, GOLGA3, HSPA8, GABARAPL2, RAB8A, SCAMP3, OPTN, ERGIC1, ERGIC2, COG3, KIF1C, ARF1, ARRB1, ARCN1, GOSR1, CUX1, SPAST, TRAPPC2, DNM2	1755	131	13528	1.70641	1	0.164261	8.66211
GOTERM_BP_FAT	GO:0006417~regulation of translation	30	1.33274	0.004848	CPEB2, MKNK2, CALR, AKT1, EIF4EBP1, EIF3B, EIF4EBP2, RBM8A, EIF3K, SEPSECS, EIF1, THBS1, EIF2B2, FAM129A, TNRC6A, PRKCA, PAIP1, IREB2, ITGA2, CDK4, SELT, RPS5, EIF4B, EIF4G2, PA2G4, EIF2AK1, TSC1, EIF5AL1, PPP1R15B, SRP9	1755	137	13528	1.68794	1	0.16299	8.66532
GOTERM_BP_FAT	GO:0051173~positive regulation of nitrogen compound metabolic process	107	4.75344	0.00497857	MEF2C, HOXD13, RORA, FOXO3, CITED4, CBFB, GATA6, H2AFX, SUPT5H, DDAH1, BCL10, MYO6, PCBD2, RXRB, ARID1A, ARNTL, MED13, SIX4, ARID1B, AHR, HES1, EP300, MTF1, TFAP2B, PIAS2, CAMTA2, CNBP, HOXA13, SOX4, CALR, SRF, NR1H4, HNRNPAB, KLF7, IKZF2, SMAD9, KLF13, TAF8, MAML1, CREBBP, SMAD4, SMAD1, DDX5, SREBF2, RNF4, HDAC1, DYRK1B, HIVEP3, KLF2, HSP90AB1, PPARA, E2F3, ELF4, TP63, NFKB1, AKT1, MEN1, CCNE1, …	1755	644	13528	1.28072	1	0.165666	8.88858
GOTERM_BP_FAT	GO:0042255~ribosome assembly	6	0.266548	0.00521681	EIF6, TSR1, RPS14, RPS15, NPM1, RPL24	1755	10	13528	4.62496	1	0.171518	9.29459
GOTERM_BP_FAT	GO:0018107~peptidyl-threonine phosphorylation	8	0.355398	0.00526056	PRKCA, PDPK1, SBK1, HIPK3, TGFBR2, MAPK8, ADRBK1, CAD	1755	18	13528	3.42589	1	0.171474	9.36895
GOTERM_BP_FAT	GO:0030705~cytoskeleton-dependent intracellular transport	15	0.666371	0.00527665	MYL6, MYO5A, MYO6, KIF5B, UCHL1, MYH2, KLC2, MYH9, KIF1A, KIF1B, MACF1, RHOT2, PAFAH1B1, MYH14, HAP1	1755	52	13528	2.22354	1	0.170615	9.39629
GOTERM_BP_FAT	GO:0007005~mitochondrion organization	30	1.33274	0.0053968	BID, YWHAZ, MTX3, TIMM50, AKT1, BAK1, TFAM, IMMP2L, NDUFS5, TYMP, MRPL12, SH3GLB1, COL4A3BP, SYNJ2, COX18, MYC, DNAJA3, HSP90AA1, POLG, TP53, TOMM40, BCS1L, SOD2, ATP7A, MFN2, MAN2A1, POLRMT, MFN1, LETM1, CLN8	1755	138	13528	1.67571	1	0.17281	9.60018
GOTERM_BP_FAT	GO:0050657~nucleic acid transport	23	1.02177	0.00569498	XPOT, PABPN1, HNRNPA1L2, XPO1, NUP98, UPF2, MYO1C, HNRNPA2B1, G3BP2, NUP93, SMG1, NUP155, HNRNPA1, PHAX, TSC1, RBM8A, NUP210, EIF5AL1, NUP205, NPM1, KHSRP, RANBP2, NUP43	1755	97	13528	1.82773	1	0.180081	10.1043
GOTERM_BP_FAT	GO:0051236~establishment of RNA localization	23	1.02177	0.00569498	XPOT, PABPN1, HNRNPA1L2, XPO1, NUP98, UPF2, MYO1C, HNRNPA2B1, G3BP2, NUP93, SMG1, NUP155, HNRNPA1, PHAX, TSC1, RBM8A, NUP210, EIF5AL1, NUP205, NPM1, KHSRP, RANBP2, NUP43	1755	97	13528	1.82773	1	0.180081	10.1043
GOTERM_BP_FAT	GO:0050658~RNA transport	23	1.02177	0.00569498	XPOT, PABPN1, HNRNPA1L2, XPO1, NUP98, UPF2, MYO1C, HNRNPA2B1, G3BP2, NUP93, SMG1, NUP155, HNRNPA1, PHAX, TSC1, RBM8A, NUP210, EIF5AL1, NUP205, NPM1, KHSRP, RANBP2, NUP43	1755	97	13528	1.82773	1	0.180081	10.1043
GOTERM_BP_FAT	GO:0010629~negative regulation of gene expression	86	3.82052	0.00606448	MEF2C, PPARA, PPARD, TP63, NFKB1, CBX2, PAWR, CBFA2T2, CBX5, MEN1, SAP30, HOXC8, SIN3B, SIN3A, SUPT5H, BCL7A, SIK1, FGF2, MYC, DEDD2, ATF7IP, KHDRBS1, GABPA, MECP2, TP53, SPEN, RBBP7, MBD2, PKIA, PURB, SUZ12, HES1, PA2G4, TIMELESS, RPS14, NAB1, HES2, MDM2, CELF1, CUX1, LCOR, KDM6B, BTAF1, HMGB1, EID2, CALR, ZNF174, SRRT, HIC2, SUMO1, TRIM66, HAND1, GATAD2A, TNRC6A, NR1H4, SIM2, ETV3, ENO1, HNRNPA…	1755	504	13528	1.3153	1	0.18918	10.7254
GOTERM_BP_FAT	GO:0035295~tube development	43	1.91026	0.00606962	WNT5A, BBS5, PTK7, BMPR2, HOXD13, TP63, SRF, ASAH1, PFN1, HAND1, HOXA5, GATA6, CRISPLD2, HAND2, NKX3-1, HHIP, FGF2, TRAF4, HECTD1, SIM2, B4GALT1, BCL10, TGFBR2, VANGL2, SMAD4, IGF1, CELSR1, FOXP1, BCL2L11, FZD6, HES1, ATP7A, MAN2A1, EP300, TSC1, TIMELESS, JMJD6, SALL1, IFT172, ZIC5, CUX1, NFIB, BMPR1A	1755	220	13528	1.50661	1	0.187917	10.734
GOTERM_BP_FAT	GO:0051172~negative regulation of nitrogen compound metabolic process	88	3.90937	0.00637382	MEF2C, PPARA, PPARD, TP63, NFKB1, CBX2, PAWR, CBFA2T2, CBX5, CDT1, MEN1, SAP30, HOXC8, SIN3B, SIN3A, SUPT5H, BCL7A, SIK1, FGF2, DEDD2, ATF7IP, KHDRBS1, CDC6, GTPBP4, GABPA, MECP2, TP53, SPEN, RBBP7, MBD2, PKIA, PURB, SUZ12, HES1, PA2G4, TIMELESS, RPS14, HES2, NAB1, MDM2, CUX1, LCOR, KDM6B, BTAF1, HMGB1, EID2, CALR, ZNF174, HIC2, SUMO1, TRIM66, HAND1, NPM1, GATAD2A, NR1H4, TERF2, SIM2, ETV3, ENO1,…	1755	519	13528	1.30699	1	0.194931	11.2421
GOTERM_BP_FAT	GO:0000122~negative regulation of transcription from RNA polymerase II promoter	50	2.22124	0.00659249	MEF2C, PPARA, PPARD, TP63, CBX2, NFKB1, PAWR, MEN1, SAP30, HOXC8, SIN3A, SIK1, SUPT5H, ATF7IP, GABPA, TP53, MECP2, RBBP7, MBD2, PKIA, HES1, SUZ12, RPS14, MDM2, LCOR, CUX1, KDM6B, HMGB1, CALR, ZNF174, HAND1, NR1H4, ENO1, SIM2, ETV3, ZBTB7A, WDTC1, SMAD7, KLF10, TRIM28, SKI, WWTR1, STAT3, FOXP1, HDAC1, RNF2, DNMT1, HIVEP1, NFIC, TBL1X	1755	266	13528	1.44892	1	0.199459	11.6057
GOTERM_BP_FAT	GO:0007568~aging	25	1.11062	0.00666857	PRKCA, HSD17B10, LIMS1, TACR3, POLG, ATP6AP1, TP53, TP63, ADRBK1, WRN, CALR, SRF, PTEN, ATP5G3, SOD2, SREBF2, NRAS, SLC1A2, MORC3, NPM1, PEBP1, CLN8, DNAJA3, TERF2, FKBPL	1755	110	13528	1.75188	1	0.200068	11.7319
GOTERM_BP_FAT	GO:0042254~ribosome biogenesis	27	1.19947	0.00673589	EIF6, SURF6, NHP2L1, MINA, EBNA1BP2, RPS28, WDR55, NPM1, RPL11, RPL7A, FTSJ1, FTSJ3, RPS24, GTPBP4, TSR1, EXOSC6, EXOSC2, HEATR1, RPL24, RRP9, PA2G4, DDX56, RPS16, TSC1, RPS14, RPS15, POP4	1755	122	13528	1.70593	1	0.200433	11.8434
GOTERM_BP_FAT	GO:0031497~chromatin assembly	21	0.932919	0.00697301	HIST1H2AB, HIST1H2AC, HIST2H2AA3, HIST1H1E, SHPRH, HIST1H2BD, HIST1H2AE, H1FX, TSPYL4, HIST1H1T, HIST1H2BN, NPM1, SMARCA5, HIST1H2AH, H3F3B, HIST1H4C, H2AFX, HIST1H3D, H3F3C, HIST1H2AM, CHAF1A, HIST3H2BB, CHAF1B	1755	87	13528	1.86061	1	0.205267	12.2351
GOTERM_BP_FAT	GO:0006511~ubiquitin-dependent protein catabolic process	46	2.04354	0.00755234	RAD23B, USP9X, UBE2G1, BTRC, UCHL1, PSMA7, CD2AP, EDEM1, ARIH1, PSMF1, CUL5, PSMB6, PSMB1, PSMD2, PSMD3, USP10, PSMD5, USP31, USP13, CDK1, NPLOC4, UBE4B, UBR3, CDC20, PCNP, UBR1, UBE2H, CDC27, UBE2B, PSMB9, CCNB1, USP28, HSP90B1, TOM1L1, PSMC3, PSMD11, PSMA4, MDM2, USP49, UCHL3, PSME3, UBB, FAF1, TBL1X, RNF40, FBXO11	1755	242	13528	1.46521	1	0.21882	13.1852
GOTERM_BP_FAT	GO:0031145~anaphase-promoting complex-dependent proteasomal ubiquitin-dependent protein catabolic process	17	0.75522	0.00762466	CDK1, CDC20, PSMA7, CDC27, PSMB9, CCNB1, PSMF1, PSMB6, PSMB1, PSMC3, PSMD11, PSMA4, PSMD2, PSMD3, PSME3, UBB, PSMD5	1755	65	13528	2.01601	1	0.219153	13.3031
GOTERM_BP_FAT	GO:0010557~positive regulation of macromolecule biosynthetic process	107	4.75344	0.00790866	MEF2C, TLR3, HOXD13, RORA, FOXO3, CITED4, CBFB, GATA6, SUPT5H, SYK, BCL10, MYO6, PCBD2, RXRB, ARID1A, ARNTL, MED13, SIX4, ARID1B, AHR, HES1, EP300, MTF1, TFAP2B, PIAS2, CAMTA2, CNBP, HOXA13, SOX4, CALR, SRF, DYRK2, NR1H4, HNRNPAB, KLF7, IKZF2, SMAD9, KLF13, TAF8, MAML1, CREBBP, TNFRSF13C, SMAD4, CD276, ITGA2, SMAD1, DDX5, SREBF2, RNF4, HDAC1, DYRK1B, HIVEP3, KLF2, PPARA, E2F3, ELF4, TP63, NFKB1, …	1755	654	13528	1.26114	1	0.224802	13.7647
GOTERM_BP_FAT	GO:0006403~RNA localization	23	1.02177	0.00826846	XPOT, PABPN1, HNRNPA1L2, XPO1, NUP98, UPF2, MYO1C, HNRNPA2B1, G3BP2, NUP93, SMG1, NUP155, HNRNPA1, PHAX, TSC1, RBM8A, NUP210, EIF5AL1, NUP205, NPM1, KHSRP, RANBP2, NUP43	1755	100	13528	1.7729	1	0.232197	14.3461
GOTERM_BP_FAT	GO:0042274~ribosomal small subunit biogenesis	6	0.266548	0.00855166	RPS28, RPS16, RPS14, RPS15, NPM1, RPS24	1755	11	13528	4.20451	1	0.237554	14.8012
GOTERM_BP_FAT	GO:0018105~peptidyl-serine phosphorylation	10	0.444247	0.00893166	PRKCA, AKT1, SBK1, MORC3, GSK3B, HIPK3, TGFBR2, SMG1, ADRBK1, STK4	1755	29	13528	2.65802	1	0.24511	15.4081
GOTERM_BP_FAT	GO:0016192~vesicle-mediated transport	95	4.22035	0.00970851	CLTA, SEC24A, LDLR, SRCIN1, HIP1R, VPS54, ATP5B, ATL3, SYNJ1, CRCP, RASSF9, EPS15L1, TXLNA, CLTC, ZFYVE20, RTN3, HOOK3, ASGR2, AP2B1, ACTR1A, ZFYVE16, VPS4B, NECAP1, RAB6B, SAR1B, GOLGA4, KDELR1, SAR1A, GOLGA3, KDELR2, SYNRG, SCAMP3, ARC, MYO6, STX3, RPH3AL, OPTN, ERGIC1, LDLRAP1, FLNA, ERGIC2, ELMO1, KIF1C, GAPVD1, TRIM36, ARRB1, ARCN1, OPHN1, ERC1, CUX1, UNC13B, SPAST, TRAPPC2, YWHAZ, STX7, RAB…	1755	576	13528	1.27133	1	0.261741	16.6363
GOTERM_BP_FAT	GO:0030029~actin filament-based process	45	1.99911	0.0112705	MYO5A, CXCL1, ALDOA, MYL6, TRIOBP, TLN1, SHROOM4, NUAK2, DIAPH1, ABI2, CALR, CAPZB, LLGL1, CDC42, PFN1, PDPK1, EZR, DYNLL1, PAFAH1B1, EHD2, RHOF, ARHGEF2, FMNL3, MYO6, NF2, TAOK2, TRPM7, MYH2, MYH9, FLNB, LPIN1, FLNA, ELMO1, FMN1, EPB41L3, NRAS, MYH11, OPHN1, TMSB4X, KPTN, WASL, MYH14, ABL2, FHOD1, ADD1	1755	241	13528	1.4393	1	0.295264	19.0549
GOTERM_BP_FAT	GO:0065004~protein-DNA complex assembly	21	0.932919	0.0115744	HIST1H2AB, HIST1H2AC, HIST2H2AA3, HIST1H1E, SHPRH, HIST1H2BD, HIST1H2AE, H1FX, TSPYL4, HIST1H1T, HIST1H2BN, NPM1, SMARCA5, HIST1H2AH, H3F3B, HIST1H4C, H2AFX, HIST1H3D, H3F3C, HIST1H2AM, CHAF1A, HIST3H2BB, CHAF1B	1755	91	13528	1.77883	1	0.30006	19.5177
GOTERM_BP_FAT	GO:0001959~regulation of cytokine-mediated signaling pathway	7	0.310973	0.0118468	HSP90AB1, IRAK1, IRAK3, IL6ST, ADIPOQ, DNAJA3, CDC37	1755	16	13528	3.37236	1	0.304079	19.9303
GOTERM_BP_FAT	GO:0050764~regulation of phagocytosis	7	0.310973	0.0118468	C3, ITGA2, SCARB1, CLEC7A, CALR, ADIPOQ, PTEN	1755	16	13528	3.37236	1	0.304079	19.9303
GOTERM_BP_FAT	GO:0045893~positive regulation of transcription, DNA-dependent	80	3.55398	0.0121123	MEF2C, PPARA, E2F3, ELF4, HOXD13, TP63, NFKB1, RORA, FOXO3, CBFB, MEN1, CCNE1, PAX9, GATA6, SUPT5H, FGF2, MYC, SERTAD2, ATF7IP, BCL10, AR, MYO6, PCBD2, RXRB, SOX11, TP53, ARID1A, ARNTL, ESR2, MED13, SIX4, ARID1B, HMGA1, AHR, HES1, MURC, EP300, MTF1, NCOA3, TFAP2B, PIAS2, CAMTA2, CNBP, HOXA13, SOX4, NFYB, SRF, MRPL12, HAND1, REL, HAND2, BCL11B, NFAT5, NR1H4, HNRNPAB, KLF7, CEBPB, IKZF2, KLF13, TAF…	1755	477	13528	1.29279	1	0.307876	20.3307
GOTERM_BP_FAT	GO:0031397~negative regulation of protein ubiquitination	18	0.799645	0.0123462	GTPBP4, SMAD7, CDC20, PSMA7, CDC27, PSMB9, PSMF1, PSMB6, PSMB1, TSC1, PSMC3, PSMD11, PSMA4, PSMD2, PSMD3, PSME3, UBB, PSMD5	1755	74	13528	1.87498	1	0.310936	20.6817
GOTERM_BP_FAT	GO:0022618~ribonucleoprotein complex assembly	17	0.75522	0.0136726	EIF6, CLNS1A, TSR1, SNRPD3, SF1, SNRPD1, RPL24, MBNL1, SF3A3, PHAX, DDX23, RPS14, RPS15, NPM1, CELF1, GEMIN6, SNRPE	1755	69	13528	1.89914	1	0.336178	22.6452
GOTERM_BP_FAT	GO:0016311~dephosphorylation	31	1.37717	0.0139619	PPP6C, CDC14B, SYNJ1, DUSP10, TIMM50, DUSP11, PTEN, MTMR1, PPP2CA, SYNJ2, PTPRJ, PPP2R1A, PTPRE, PTPN14, PTPN13, PPP1CC, CDKN3, PPP1CB, CDC25A, SACM1L, DUSP5, DUSP28, MTMR14, PPM1D, G6PC, MTMR10, PTP4A1, PTP4A2, PPM1L, DUSP7, PPP2R2A	1755	154	13528	1.55166	1	0.339978	23.0672
GOTERM_BP_FAT	GO:0006325~chromatin organization	65	2.88761	0.0142533	HIST2H2AA3, ARID4B, H1FX, CBX2, CBX6, CBX5, MEN1, HIST1H2BN, SMARCD2, HIRIP3, H2AFX, HIST3H2BB, SUPT5H, HIST1H1E, RBBP4, BRCC3, RBL2, ARID1A, ARID1B, HMGA2, RBBP7, HMGA1, UBE2B, SUZ12, HIST1H1T, EP300, SMARCA5, RUVBL2, CARM1, KDM6B, SUV420H1, ING5, SMARCAD1, HIST1H2AB, HIST1H2AC, HMGB1, SETD1B, HIST1H2AE, TSPYL4, SAFB, NPM1, HIST1H4C, KDM3B, CHD4, TERF2, SETDB1, KAT2A, KAT2B, HIST1H2BD, SHPRH, CR…	1755	378	13528	1.32549	1	0.343746	23.4901
GOTERM_BP_FAT	GO:0044087~regulation of cellular component biogenesis	29	1.28832	0.0146559	HMGB1, TRIOBP, ACTR3B, HCFC1, SRF, PTEN, CAPZB, CDC42, SUMO1, EIF4EBP1, ARPC2, THBS1, MDN1, RASA1, ATF7IP, PRKCA, NF2, SMAD6, MAP1B, AHR, TSC1, GSK3B, TPPP, TMSB4X, CHRNB2, UBB, FAF1, MAPRE1, ADD1	1755	142	13528	1.57422	1	0.349583	24.0708
GOTERM_BP_FAT	GO:0051129~negative regulation of cellular component organization	29	1.28832	0.0146559	HMGB1, TRIOBP, PLXNA3, PTEN, CAPZB, EPHB2, CDC42, IRAK3, EIF4EBP1, APOA1, NPM1, BUB1, CLASP1, THBS1, ARHGDIA, TERF2, ARHGEF2, SMAD7, SMAD6, MAP1B, CST3, ESPL1, ADIPOQ, ATM, DNMT1, MAP4, TMSB4X, MAPRE1, ADD1	1755	142	13528	1.57422	1	0.349583	24.0708
GOTERM_BP_FAT	GO:0045941~positive regulation of transcription	92	4.08707	0.0146971	MEF2C, PPARA, E2F3, ELF4, HOXD13, TP63, NFKB1, RORA, FOXO3, CITED4, CBFB, MEN1, CCNE1, PAX9, GATA6, SERTAD3, SUPT5H, FGF2, MYC, SERTAD2, ATF7IP, IRAK1, BCL10, AR, MYO6, BRF1, PCBD2, RXRB, SOX11, TP53, ARID1A, ARNTL, ESR2, MED13, SIX4, ARID1B, HMGA1, AHR, HES1, MED7, MURC, EP300, MTF1, NCOA3, TFAP2B, PIAS2, UBB, ING5, SMARCAD1, CAMTA2, CNBP, HOXA13, SOX4, NFYB, SRF, MRPL12, HAND1, REL, HAND2, BCL1…	1755	564	13528	1.25738	1	0.348413	24.13
GOTERM_BP_FAT	GO:0051254~positive regulation of RNA metabolic process	80	3.55398	0.0147249	MEF2C, PPARA, E2F3, ELF4, HOXD13, TP63, NFKB1, RORA, FOXO3, CBFB, MEN1, CCNE1, PAX9, GATA6, SUPT5H, FGF2, MYC, SERTAD2, ATF7IP, BCL10, AR, MYO6, PCBD2, RXRB, SOX11, TP53, ARID1A, ARNTL, ESR2, MED13, SIX4, ARID1B, HMGA1, AHR, HES1, MURC, EP300, MTF1, NCOA3, TFAP2B, PIAS2, CAMTA2, CNBP, HOXA13, SOX4, NFYB, SRF, MRPL12, HAND1, REL, HAND2, BCL11B, NFAT5, NR1H4, HNRNPAB, KLF7, CEBPB, IKZF2, KLF13, TAF…	1755	481	13528	1.28204	1	0.347001	24.1699
GOTERM_BP_FAT	GO:0051259~protein oligomerization	34	1.51044	0.0151761	SMARCAD1, HSD17B10, ATL3, TP63, CDH1, CDH2, TRIM72, TRIM4, IGF1R, GPX3, NPM1, FAS, SLC1A1, GCHFR, BCL10, SHMT1, IRAK1, NACC1, NACC2, SCUBE3, PCBD2, ALDH5A1, TP53, SKI, PFKM, ITPR3, ADIPOQ, RAD51, SOD2, TSC1, RRM1, PEBP1, ATG16L1, SPAST	1755	174	13528	1.50621	1	0.353582	24.815
GOTERM_BP_FAT	GO:0010628~positive regulation of gene expression	94	4.17592	0.0164683	MEF2C, PPARA, E2F3, ELF4, TP63, HOXD13, NFKB1, RORA, FOXO3, CITED4, CBFB, MEN1, CCNE1, PAX9, GATA6, SERTAD3, SUPT5H, FGF2, MYC, SERTAD2, ATF7IP, IRAK1, BCL10, AR, MYO6, BRF1, PCBD2, RXRB, SOX11, TP53, ARID1A, ARNTL, ESR2, MED13, SIX4, ARID1B, HMGA1, AHR, HES1, MED7, MURC, EP300, MTF1, NCOA3, TFAP2B, MAPK9, PIAS2, UBB, ING5, SMARCAD1, CAMTA2, CNBP, HOXA13, SOX4, NFYB, SRF, MRPL12, HAND1, REL, HAND…	1755	581	13528	1.24712	1	0.375326	26.6338
GOTERM_BP_FAT	GO:0016044~membrane organization	65	2.88761	0.0166761	CLTA, SEC24A, LDLR, HIP1R, ATP5B, SYNJ1, TIMM50, EPS15L1, SYT7, CLTC, ASGR2, BAK1, NECAP1, SAR1B, COX18, DHCR24, VCPIP1, SYNRG, ARC, HSP90AA1, MYO6, STX3, CCDC88A, MYH2, TP53, LDLRAP1, ELMO1, MFN2, MFN1, LETM1, GAPVD1, ARRB1, ARCN1, OPHN1, CLN8, BID, STX7, GULP1, SNX1, CDC42SE1, TRIM72, SH3GLB1, FOLR1, PAFAH1B1, SCARB1, THBS1, EMD, EHD2, HSPA8, UPK2, NPLOC4, RAB8A, VAV3, TGFBR2, NRAS, LMBR1L, ARF…	1755	381	13528	1.31506	1	0.377039	26.9224
GOTERM_BP_FAT	GO:0007010~cytoskeleton organization	73	3.243	0.0170505	TLN1, PRC1, NUAK2, VPS54, AURKA, TTL, HOOK3, CDC42, KIF2C, PDPK1, DYNLL1, NCKIPSD, DYNC1H1, PPP4C, RHOF, FMNL3, ARHGEF2, STMN3, TRPM7, ESPL1, MYH9, LPIN1, UBE2B, FLNB, FLNA, ELMO1, FMN1, EPB41L3, ZWINT, TPPP, FGFR1OP, OPHN1, TMSB4X, WASL, CLN8, SPAST, FHOD1, ADD1, ALDOA, CXCL1, TRIOBP, HAUS3, CEP120, SHROOM4, DIAPH1, NEK2, HAUS1, ABI2, RCC1, CALR, CAPZB, LLGL1, PFN1, TUBB, EZR, MACF1, NPM1, PAFAH…	1755	436	13528	1.2906	1	0.38166	27.4395
GOTERM_BP_FAT	GO:0007006~mitochondrial membrane organization	10	0.444247	0.0174944	MFN2, BID, BAK1, LETM1, HSP90AA1, SH3GLB1, TP53, TIMM50, COX18, CLN8	1755	32	13528	2.40883	1	0.387393	28.0483
GOTERM_BP_FAT	GO:0001783~B cell apoptosis	4	0.177699	0.0177564	TRAF3IP2, BAK1, MYC, BCL2L11	1755	5	13528	6.16661	1	0.389893	28.4053
GOTERM_BP_FAT	GO:0001736~establishment of planar polarity	4	0.177699	0.0177564	VANGL2, TP63, CELSR1, FZD6	1755	5	13528	6.16661	1	0.389893	28.4053
GOTERM_BP_FAT	GO:0006793~phosphorus metabolic process	149	6.61928	0.0182083	PRPF4B, STK38, EFNA1, ATP6AP1, DSTYK, AURKA, AURKB, MAP3K6, MAP3K4, COL4A3BP, AAK1, SYK, PTPRJ, IKBKAP, TWF1, STK25, CSNK1G2, PIM3, PPP1CC, PPP1CB, STK4, WEE1, MARK2, EIF2AK1, SCYL2, TESK1, MAPK9, NEK9, MAPK8, ERC1, NEK6, CDK5R1, NEK2, PTK7, BMPR2, DUSP10, CHEK1, ADRBK1, DUSP11, STK17A, EPHB2, CAMKV, IRAK3, SBK1, DYRK2, ITK, TAOK2, SMAD7, TAOK1, MAP2K4, TGFBR2, PTPN14, TRIO, PTPN13, SMG1, ATM, ND…	1755	973	13528	1.1804	1	0.395562	29.0171
GOTERM_BP_FAT	GO:0006796~phosphate metabolic process	149	6.61928	0.0182083	PRPF4B, STK38, EFNA1, ATP6AP1, DSTYK, AURKA, AURKB, MAP3K6, MAP3K4, COL4A3BP, AAK1, SYK, PTPRJ, IKBKAP, TWF1, STK25, CSNK1G2, PIM3, PPP1CC, PPP1CB, STK4, WEE1, MARK2, EIF2AK1, SCYL2, TESK1, MAPK9, NEK9, MAPK8, ERC1, NEK6, CDK5R1, NEK2, PTK7, BMPR2, DUSP10, CHEK1, ADRBK1, DUSP11, STK17A, EPHB2, CAMKV, IRAK3, SBK1, DYRK2, ITK, TAOK2, SMAD7, TAOK1, MAP2K4, TGFBR2, PTPN14, TRIO, PTPN13, SMG1, ATM, ND…	1755	973	13528	1.1804	1	0.395562	29.0171
GOTERM_BP_FAT	GO:0007162~negative regulation of cell adhesion	12	0.533096	0.0186689	MIA3, GTPBP4, ADAM10, NF2, SRCIN1, ATP5B, CD164, THBS1, ADIPOQ, PTEN, RASA1, ARHGDIA	1755	43	13528	2.15114	1	0.401253	29.6356
GOTERM_BP_FAT	GO:0006112~energy reserve metabolic process	12	0.533096	0.0186689	AKT1, PPP1R3D, G6PC, PPP1R3B, PYGL, IL6ST, GFPT1, GSK3B, GFPT2, GAA, PPP1CC, PPP1CB	1755	43	13528	2.15114	1	0.401253	29.6356
GOTERM_BP_FAT	GO:0051168~nuclear export	15	0.666371	0.019252	XPOT, PABPN1, XPO1, UPF2, SMG1, CALR, HNRNPA1, ATXN1, PHAX, TSC1, GSK3B, EIF5AL1, NPM1, RPS15, LSG1	1755	60	13528	1.92707	1	0.40882	30.4114
GOTERM_BP_FAT	GO:0042981~regulation of apoptosis	125	5.55309	0.0200634	MEF2C, XRCC2, JAG2, FOXO3, CIAPIN1, CTNNBL1, BAK1, G2E3, CUL5, TPT1, RPL11, FAS, BCL10, BARHL1, GRIN2A, PIM3, STK4, BCL2L11, TIAL1, MAPK9, MAPK8, UNC13B, PRODH, TRAF1, HMGB1, CDK5R1, MCL1, HOXA13, SOX4, HSPA1B, STK17A, CALR, SLC11A2, TUBB, NPM1, GLO1, DYRK2, RUNX3, ARHGDIA, TRAF4, DNAJA3, TRAF3, B4GALT1, COL18A1, VAV3, SMAD6, KLF10, TRIO, GAS1, WRN, ATM, CIDEC, ATP7A, BFAR, NOTCH2, EPHA7, HDAC1, …	1755	804	13528	1.19842	1	0.419842	31.4773
GOTERM_BP_FAT	GO:0007163~establishment or maintenance of cell polarity	13	0.577521	0.0201826	CDC42, IGF1R, PARD6B, LIMS1, EZR, MACF1, PTK7, DOCK7, CLASP1, PAFAH1B1, MYH9, LLGL1, MARK2	1755	49	13528	2.04505	1	0.419689	31.6327
GOTERM_BP_FAT	GO:0060627~regulation of vesicle-mediated transport	21	0.932919	0.0204137	PRKCA, B4GALT1, RAB3D, C3, ATP6AP1, RAB4A, RPH3AL, ITGA2, CALR, ADIPOQ, PTEN, LDLRAP1, CD2AP, HMOX1, ZFYVE16, SCARB1, CLEC7A, FGF2, NSF, CACNA1A, SYK	1755	96	13528	1.68618	1	0.421292	31.9328
GOTERM_BP_FAT	GO:0001738~morphogenesis of a polarized epithelium	5	0.222124	0.020673	VANGL2, PTK7, TP63, CELSR1, FZD6	1755	9	13528	4.28237	1	0.423309	32.268
GOTERM_BP_FAT	GO:0043067~regulation of programmed cell death	126	5.59751	0.0207817	MEF2C, XRCC2, JAG2, FOXO3, CIAPIN1, CTNNBL1, BAK1, G2E3, CUL5, TPT1, RPL11, FAS, BCL10, BARHL1, GRIN2A, PIM3, STK4, BCL2L11, TIAL1, MAPK9, MAPK8, UNC13B, PRODH, TRAF1, HMGB1, CDK5R1, MCL1, HOXA13, SOX4, HSPA1B, STK17A, CALR, SLC11A2, TUBB, NPM1, GLO1, DYRK2, RUNX3, ARHGDIA, TRAF4, DNAJA3, TRAF3, B4GALT1, COL18A1, VAV3, SMAD6, KLF10, TRIO, GAS1, WRN, ATM, CIDEC, ATP7A, BFAR, NOTCH2, EPHA7, HDAC1, …	1755	812	13528	1.19611	1	0.422976	32.4081
GOTERM_BP_FAT	GO:0043009~chordate embryonic development	57	2.53221	0.0212867	XRCC2, NDST1, HOXC6, MEN1, G2E3, GATA6, COL4A3BP, CHST11, BCL10, AR, ADAM10, GABPA, VANGL2, TP53, MBNL1, SIX4, MYH9, BCL2L11, RIC8A, HES1, MFN2, MAN2A1, EP300, NLE1, ADD1, FKBP8, LIMS1, PTK7, CDH1, SRF, PFN1, HOXA3, HAND1, HAND2, HOXA5, BTF3, NKX3-1, TERF2, HECTD1, MAFG, KAT2A, WDTC1, CEBPB, TAF8, TGFBR2, GAS1, CELSR1, ATM, DVL1, FZD6, PLCG1, TSC1, PSMC3, GFPT1, HOXB5, IFT172, ZIC5	1755	331	13528	1.3274	1	0.428697	33.0553
GOTERM_BP_FAT	GO:0051726~regulation of cell cycle	57	2.53221	0.0212867	E2F2, XPO1, PTEN, CDT1, MEN1, AKT1, CDC42, BAK1, TGFA, H2AFX, E4F1, SIK1, MYC, CDK1, CDC6, GTPBP4, BRCC3, TP53, ESPL1, PIM3, CDK4, PKIA, PPP1CB, CCND1, TIMELESS, ZWINT, BTG3, PEBP1, MDM2, NEK6, CDK5R1, HOXA13, NEK2, HCFC1, RPS15A, CHEK1, RCC1, CALR, CDC37, PIN1, NPM1, BUB1, HECTD3, RUNX3, HSPA8, PLA2G16, SMAD6, IGF1, RPL24, GAS1, CDKN3, CDC25A, ATM, CCNB1, HDAC1, CKS2, SMC1A	1755	331	13528	1.3274	1	0.428697	33.0553
GOTERM_BP_FAT	GO:0007569~cell aging	10	0.444247	0.0213628	HSD17B10, NRAS, LIMS1, MORC3, NPM1, TP53, TP63, WRN, DNAJA3, TERF2	1755	33	13528	2.33584	1	0.427845	33.1523
GOTERM_BP_FAT	GO:0006281~DNA repair	50	2.22124	0.0214971	CLSPN, XRCC2, UVRAG, MEN1, RAD21, NSMCE1, H2AFX, FANCC, POLL, BRCC3, POLI, POLG, POLE, PAPD7, TP53, APTX, UBE2B, ESCO2, RAD51, RECQL, RPAIN, BTG2, RUVBL2, REV3L, RAD23B, HMGB1, WRNIP1, MRE11A, CHEK1, TTC5, RBX1, RPA2, SUMO1, POLQ, APEX1, NTHL1, SHPRH, MSH3, SMG1, WRN, ATM, SMC3, SOD2, MPG, ATXN3, CSNK1E, SMC1A, CHAF1A, CHAF1B, PARP2	1755	284	13528	1.35709	1	0.427879	33.3232
GOTERM_BP_FAT	GO:0030509~BMP signaling pathway	12	0.533096	0.0220612	TWSG1, SMAD9, CHRDL1, SMAD7, USP9X, ZFYVE16, SMAD6, SMAD4, BMPR2, SKI, SMAD1, BMPR1A	1755	44	13528	2.10225	1	0.434297	34.0366
GOTERM_BP_FAT	GO:0051352~negative regulation of ligase activity	16	0.710795	0.0226243	SMAD7, CDC20, PSMA7, CDC27, PSMB9, PSMF1, PSMB6, PSMB1, PSMC3, PSMD11, PSMA4, PSMD2, PSMD3, PSME3, UBB, PSMD5	1755	67	13528	1.84078	1	0.440554	34.7413
GOTERM_BP_FAT	GO:0051444~negative regulation of ubiquitin-protein ligase activity	16	0.710795	0.0226243	SMAD7, CDC20, PSMA7, CDC27, PSMB9, PSMF1, PSMB6, PSMB1, PSMC3, PSMD11, PSMA4, PSMD2, PSMD3, PSME3, UBB, PSMD5	1755	67	13528	1.84078	1	0.440554	34.7413
GOTERM_BP_FAT	GO:0010941~regulation of cell death	126	5.59751	0.0229879	MEF2C, XRCC2, JAG2, FOXO3, CIAPIN1, CTNNBL1, BAK1, G2E3, CUL5, TPT1, RPL11, FAS, BCL10, BARHL1, GRIN2A, PIM3, STK4, BCL2L11, TIAL1, MAPK9, MAPK8, UNC13B, PRODH, TRAF1, HMGB1, CDK5R1, MCL1, HOXA13, SOX4, HSPA1B, STK17A, CALR, SLC11A2, TUBB, NPM1, GLO1, DYRK2, RUNX3, ARHGDIA, TRAF4, DNAJA3, TRAF3, B4GALT1, COL18A1, VAV3, SMAD6, KLF10, TRIO, GAS1, WRN, ATM, CIDEC, ATP7A, BFAR, NOTCH2, EPHA7, HDAC1, …	1755	815	13528	1.19171	1	0.443814	35.1926
GOTERM_BP_FAT	GO:0045935~positive regulation of nucleobase, nucleoside, nucleotide and nucleic acid metabolic process	99	4.39805	0.0232195	MEF2C, PPARA, E2F3, ELF4, HOXD13, TP63, NFKB1, RORA, FOXO3, CITED4, CBFB, MEN1, CCNE1, PAX9, GATA6, SERTAD3, H2AFX, SUPT5H, MYC, FGF2, SERTAD2, ATF7IP, IRAK1, BCL10, AR, BRCC3, BRF1, MYO6, PCBD2, RXRB, SOX11, TP53, ARID1A, ARNTL, ARID1B, SIX4, MED13, ESR2, HMGA1, AHR, RAD51, HES1, MURC, MED7, EP300, NCOA3, MTF1, TFAP2B, PIAS2, UBB, SMARCAD1, ING5, CAMTA2, CNBP, HOXA13, SOX4, NFYB, CALR, SRF, IGF1…	1755	624	13528	1.22295	1	0.445142	35.4786
GOTERM_BP_FAT	GO:0006916~anti-apoptosis	38	1.68814	0.0239091	MEF2C, HMGB1, YWHAZ, MCL1, XIAP, TP63, NFKB1, HSPA1B, CIAPIN1, AKT1, IGF1R, SH3GLB1, HMOX1, NPM1, TPT1, GLO1, FAS, THBS1, MYC, ARHGDIA, DHCR24, IRAK1, CDK1, CEBPB, SGK3, IGF1, ESR2, SOD2, NOTCH2, BFAR, HSP90B1, HDAC1, TNFRSF10D, BNIP2, GSK3B, HIPK3, UBB, GSTP1	1755	206	13528	1.42191	1	0.452884	36.3229
GOTERM_BP_FAT	GO:0018209~peptidyl-serine modification	11	0.488672	0.0239677	PRKCA, AKT1, GALNT2, SBK1, MORC3, GSK3B, HIPK3, TGFBR2, SMG1, ADRBK1, STK4	1755	39	13528	2.17413	1	0.451721	36.3942
GOTERM_BP_FAT	GO:0051276~chromosome organization	79	3.50955	0.0242022	KIFC1, HIST2H2AA3, ARID4B, CBX2, H1FX, CBX6, CBX5, MEN1, CDCA8, HIST1H2BN, SMARCD2, HIRIP3, H2AFX, HIST3H2BB, SUPT5H, HIST1H1E, RBBP4, BRCC3, RBL2, TP53, PAPD7, ESPL1, ARID1A, ARID1B, HMGA2, RBBP7, HMGA1, UBE2B, SUZ12, HIST1H1T, EP300, ZWINT, SMARCA5, RUVBL2, CARM1, KDM6B, SUV420H1, ING5, HIST1H2AB, SMARCAD1, HIST1H2AC, HMGB1, NEK2, SETD1B, MRE11A, HIST1H2AE, TSPYL4, NCAPH, SAFB, NPM1, HIST1H4C, …	1755	485	13528	1.25557	1	0.453002	36.6786
GOTERM_BP_FAT	GO:0051174~regulation of phosphorus metabolic process	79	3.50955	0.0242022	IL6ST, EFNA1, HMGCR, TLR3, PTEN, AKT1, MEN1, CDC42, BAK1, MAP3K6, PDPK1, PRKAR2A, APOA1, MAP3K4, MCM7, DYNLL1, TGFA, SPRED1, FAM129A, FGF2, SYK, PRKCA, IBTK, PPP2R1A, IRAK1, CDC6, BCL10, GTPBP4, CCDC88A, RBL2, PKN1, PPP1CB, PKIA, CCND1, TNFRSF10B, LAX1, HIPK3, PEBP1, CDK5R1, BMPR2, FKBP1A, CHEK1, CDC37, TRIB1, PIN1, IRAK3, PPP2CA, NPM1, MLLT1, THBS1, DNAJA3, AXIN1, VAV3, NF2, TAOK2, SMAD7, SMAD6,…	1755	485	13528	1.25557	1	0.453002	36.6786
GOTERM_BP_FAT	GO:0019220~regulation of phosphate metabolic process	79	3.50955	0.0242022	IL6ST, EFNA1, HMGCR, TLR3, PTEN, AKT1, MEN1, CDC42, BAK1, MAP3K6, PDPK1, PRKAR2A, APOA1, MAP3K4, MCM7, DYNLL1, TGFA, SPRED1, FAM129A, FGF2, SYK, PRKCA, IBTK, PPP2R1A, IRAK1, CDC6, BCL10, GTPBP4, CCDC88A, RBL2, PKN1, PPP1CB, PKIA, CCND1, TNFRSF10B, LAX1, HIPK3, PEBP1, CDK5R1, BMPR2, FKBP1A, CHEK1, CDC37, TRIB1, PIN1, IRAK3, PPP2CA, NPM1, MLLT1, THBS1, DNAJA3, AXIN1, VAV3, NF2, TAOK2, SMAD7, SMAD6,…	1755	485	13528	1.25557	1	0.453002	36.6786
GOTERM_BP_FAT	GO:0008285~negative regulation of cell proliferation	61	2.70991	0.0243967	PPARD, PAWR, MXI1, PTEN, MEN1, WARS, CUL5, HMOX1, ASPH, FGF2, DHCR24, PRKCA, CDC6, GTPBP4, RBBP4, SF1, TP53, ESR2, CD164, MFN2, PPM1D, EIF2AK1, BTG2, BTG3, ADAMTS1, CXCL1, ING5, FRK, CHEK1, TRIB1, MORC3, BCL11B, NPM1, NKX3-1, THBS1, RUNX3, DNAJA3, B4GALT1, COL18A1, PDS5B, KAT2B, NF2, KLF10, WDR6, TGFBR2, CTLA4, SMAD4, CD276, SKI, SMAD1, GAS1, CDKN3, TAX1BP3, SOD2, NOTCH2, TSC1, ATP5A1, LDOC1, TOB…	1755	361	13528	1.3025	1	0.453717	36.9135
GOTERM_BP_FAT	GO:0009792~embryonic development ending in birth or egg hatching	57	2.53221	0.025013	XRCC2, NDST1, HOXC6, MEN1, G2E3, GATA6, COL4A3BP, CHST11, BCL10, AR, ADAM10, GABPA, VANGL2, TP53, MBNL1, SIX4, MYH9, BCL2L11, RIC8A, HES1, MFN2, MAN2A1, EP300, NLE1, ADD1, FKBP8, LIMS1, PTK7, CDH1, SRF, PFN1, HOXA3, HAND1, HAND2, HOXA5, BTF3, NKX3-1, TERF2, HECTD1, MAFG, KAT2A, WDTC1, CEBPB, TAF8, TGFBR2, GAS1, CELSR1, ATM, DVL1, FZD6, PLCG1, TSC1, PSMC3, GFPT1, HOXB5, IFT172, ZIC5	1755	334	13528	1.31548	1	0.460137	37.6526
GOTERM_BP_FAT	GO:0006413~translational initiation	12	0.533096	0.0258839	EIF3C, BRF1, EIF3B, EIF3G, RPS3A, PAIP1, EIF3K, EIF2S3, EIF1, EIF3I, EIF2B2, RPS5	1755	45	13528	2.05554	1	0.469775	38.6832
GOTERM_BP_FAT	GO:0051130~positive regulation of cellular component organization	34	1.51044	0.0259629	HOXA13, C3, TNFRSF12A, ATP6AP1, CALR, SRF, MEN1, AKT1, CDC42, SUMO1, PDPK1, ARPC2, NPM1, TGFA, TERF2, ARHGDIA, PRKCA, NF2, MAP1B, SMAD4, ITGA2, IGF1, ESPL1, SMAD1, LDLRAP1, AHR, TSC1, GSK3B, EIF5AL1, TPPP, PEBP1, DNMT1, CLEC7A, FAF1	1755	181	13528	1.44796	1	0.468854	38.7759
GOTERM_BP_FAT	GO:0042325~regulation of phosphorylation	76	3.37628	0.0262689	IL6ST, EFNA1, HMGCR, TLR3, PTEN, AKT1, MEN1, CDC42, BAK1, MAP3K6, PDPK1, PRKAR2A, APOA1, MAP3K4, MCM7, DYNLL1, TGFA, SPRED1, FAM129A, FGF2, SYK, PRKCA, IBTK, BCL10, IRAK1, CDC6, PPP2R1A, GTPBP4, CCDC88A, RBL2, PKN1, PPP1CB, PKIA, CCND1, TNFRSF10B, LAX1, HIPK3, PEBP1, CDK5R1, BMPR2, FKBP1A, CHEK1, CDC37, TRIB1, PIN1, IRAK3, PPP2CA, NPM1, MLLT1, THBS1, DNAJA3, AXIN1, VAV3, NF2, TAOK2, SMAD7, SMAD6,…	1755	466	13528	1.25714	1	0.470898	39.1336
GOTERM_BP_FAT	GO:0010970~microtubule-based transport	9	0.399822	0.0274197	KIF1A, KIF1B, KIF5B, MACF1, UCHL1, RHOT2, PAFAH1B1, KLC2, HAP1	1755	29	13528	2.39222	1	0.483682	40.4614
GOTERM_BP_FAT	GO:0006730~one-carbon metabolic process	23	1.02177	0.0292671	ATF7IP, SHMT1, SHMT2, MAT2A, RAB3D, CA5B, TRMT61A, MTHFD1L, SUZ12, MEN1, METTL14, BTG2, JMJD6, GATAD2A, DNMT1, AHCYL1, MAT2B, AHCYL2, FTSJ1, CARM1, KDM6B, FTSJ3, SUV420H1	1755	112	13528	1.58295	1	0.504506	42.5356
GOTERM_BP_FAT	GO:0005977~glycogen metabolic process	10	0.444247	0.0308709	AKT1, PPP1R3D, G6PC, PPP1R3B, PYGL, IL6ST, GSK3B, GAA, PPP1CC, PPP1CB	1755	35	13528	2.20236	1	0.52149	44.2808
GOTERM_BP_FAT	GO:0042176~regulation of protein catabolic process	13	0.577521	0.0313781	HSP90AB1, XPO1, SMAD7, GRIN2A, EGLN2, ARNTL, FLNA, AKT1, IRAK3, PSMD2, PSMD3, MDM2, FAF1	1755	52	13528	1.92707	1	0.525336	44.8222
GOTERM_BP_FAT	GO:0015931~nucleobase, nucleoside, nucleotide and nucleic acid transport	23	1.02177	0.0320489	XPOT, PABPN1, HNRNPA1L2, XPO1, NUP98, UPF2, MYO1C, HNRNPA2B1, G3BP2, NUP93, SMG1, NUP155, HNRNPA1, PHAX, TSC1, RBM8A, NUP210, EIF5AL1, NUP205, NPM1, KHSRP, RANBP2, NUP43	1755	113	13528	1.56894	1	0.530958	45.5305
GOTERM_BP_FAT	GO:0046839~phospholipid dephosphorylation	4	0.177699	0.0321142	MTMR1, SYNJ2, PTEN, SACM1L	1755	6	13528	5.13884	1	0.529704	45.599
GOTERM_BP_FAT	GO:0006261~DNA-dependent DNA replication	14	0.621946	0.0321311	PRIM1, RPA2, HMGB1, TFAM, MCM7, RPAIN, POLG, PRIM2, WRN, MCM3, HMGA1, DNAJA3, RAD51, REV3L	1755	58	13528	1.86061	1	0.527919	45.6168
GOTERM_BP_FAT	GO:0051235~maintenance of location	15	0.666371	0.0325221	KDELR2, HSP90B1, TLN1, EZR, MORC3, FGFR1OP, G3BP2, GAA, TMSB4X, FAF1, CALR, MXI1, FLNB, KDELR1, FLNA	1755	64	13528	1.80662	1	0.530315	46.0251
GOTERM_BP_FAT	GO:0001843~neural tube closure	9	0.399822	0.0332731	PFN1, BCL10, TSC1, VANGL2, ZIC5, PTK7, CELSR1, FZD6, HECTD1	1755	30	13528	2.31248	1	0.536612	46.8012
GOTERM_BP_FAT	GO:0060606~tube closure	9	0.399822	0.0332731	PFN1, BCL10, TSC1, VANGL2, ZIC5, PTK7, CELSR1, FZD6, HECTD1	1755	30	13528	2.31248	1	0.536612	46.8012
GOTERM_BP_FAT	GO:0032507~maintenance of protein location in cell	11	0.488672	0.0332944	KDELR2, TLN1, EZR, MORC3, FGFR1OP, G3BP2, FAF1, MXI1, KDELR1, FLNB, FLNA	1755	41	13528	2.06807	1	0.534893	46.823
GOTERM_BP_FAT	GO:0007346~regulation of mitotic cell cycle	29	1.28832	0.0336665	HOXA13, NEK2, RCC1, PIN1, CDT1, CDC42, BUB1, TGFA, HECTD3, E4F1, SIK1, MYC, CDC6, CDK1, SMAD6, TP53, IGF1, ESPL1, RPL24, PIM3, GAS1, PKIA, ATM, CCND1, ZWINT, BTG3, PEBP1, MDM2, NEK6	1755	152	13528	1.47066	1	0.536979	47.2035
GOTERM_BP_FAT	GO:0043065~positive regulation of apoptosis	70	3.10973	0.0337941	FASTK, TP63, FASLG, PAWR, FOXO3, PTEN, CTNNBL1, AKT1, MEN1, BAK1, CUL5, DYNLL1, RPS3A, AEN, HMOX1, RPL11, FAS, MYC, DEDD2, PRKCA, BCL10, PPP2R1A, ARHGEF2, ARHGEF6, TP53, GRIN2A, STK4, BCL2L11, TNFRSF10B, HIPK1, TIAL1, EIF5AL1, MAPK9, MAPK8, UBB, UNC13B, PRODH, BID, CDK5R1, HOXA13, SOX4, STK17A, FEM1B, DPF1, TUBB, SH3GLB1, PPP2CA, DYRK2, PHLDA3, RUNX3, DNAJA3, TRAF3, COL18A1, TXNIP, B4GALT1, NACC1…	1755	430	13528	1.25483	1	0.536418	47.3333
GOTERM_BP_FAT	GO:0042771~DNA damage response, signal transduction by p53 class mediator resulting in induction of apoptosis	6	0.266548	0.0356961	HIPK1, AEN, TP53, TP63, DYRK2, PHLDA3	1755	15	13528	3.0833	1	0.55446	49.2338
GOTERM_BP_FAT	GO:0006732~coenzyme metabolic process	29	1.28832	0.0362925	TALDO1, HMGCR, MTHFD1L, GSS, GSR, FOLR1, GPX3, GLO1, NAPRT1, SHMT1, PDXK, SUCLG2, ALDH5A1, SUCLG1, CS, ACACA, MTHFSD, NADK, ACLY, DLAT, COQ7, IDH3A, SOD2, KIAA0100, DBT, PANK2, PANK3, CTNS, GLYR1	1755	153	13528	1.46104	1	0.558612	49.8162
GOTERM_BP_FAT	GO:0044042~glucan metabolic process	10	0.444247	0.0365842	AKT1, PPP1R3D, G6PC, PPP1R3B, PYGL, IL6ST, GSK3B, GAA, PPP1CC, PPP1CB	1755	36	13528	2.14118	1	0.559631	50.0988
GOTERM_BP_FAT	GO:0006073~cellular glucan metabolic process	10	0.444247	0.0365842	AKT1, PPP1R3D, G6PC, PPP1R3B, PYGL, IL6ST, GSK3B, GAA, PPP1CC, PPP1CB	1755	36	13528	2.14118	1	0.559631	50.0988
GOTERM_BP_FAT	GO:0006986~response to unfolded protein	16	0.710795	0.0365892	HSP90AB1, HSP90AA1, LY6G5B, CLIC1, HSPA1B, VARS, EDEM1, HSPH1, ERP44, CCND1, HSPA6, CREB3L2, TOR1B, DNAJB4, UBXN4, HSPA8	1755	71	13528	1.73707	1	0.557766	50.1036
GOTERM_BP_FAT	GO:0051436~negative regulation of ubiquitin-protein ligase activity during mitotic cell cycle	15	0.666371	0.0366816	CDC20, PSMA7, CDC27, PSMB9, PSMF1, PSMB6, PSMB1, PSMC3, PSMD11, PSMA4, PSMD2, PSMD3, PSME3, UBB, PSMD5	1755	65	13528	1.77883	1	0.55679	50.1928
GOTERM_BP_FAT	GO:0030036~actin cytoskeleton organization	40	1.77699	0.0368719	CXCL1, ALDOA, TRIOBP, TLN1, SHROOM4, NUAK2, DIAPH1, ABI2, CALR, CAPZB, LLGL1, CDC42, PFN1, PDPK1, EZR, DYNLL1, PAFAH1B1, EHD2, RHOF, ARHGEF2, FMNL3, NF2, TAOK2, TRPM7, MYH9, FLNB, LPIN1, FLNA, ELMO1, FMN1, EPB41L3, NRAS, MYH11, OPHN1, TMSB4X, KPTN, WASL, ABL2, FHOD1, ADD1	1755	226	13528	1.36429	1	0.556798	50.376
GOTERM_BP_FAT	GO:0030323~respiratory tube development	21	0.932919	0.037034	WNT5A, TGFBR2, BMPR2, ASAH1, FOXP1, HES1, ATP7A, MAN2A1, EP300, TIMELESS, HOXA5, JMJD6, CRISPLD2, GATA6, HHIP, CUX1, FGF2, TRAF4, NFIB, SIM2, BMPR1A	1755	102	13528	1.587	1	0.556527	50.5315
GOTERM_BP_FAT	GO:0001932~regulation of protein amino acid phosphorylation	32	1.42159	0.0372633	IL6ST, BMPR2, FKBP1A, PIN1, MEN1, MAP3K6, BAK1, PRKAR2A, APOA1, PPP2CA, FAM129A, FGF2, AXIN1, SYK, IBTK, PRKCA, PPP2R1A, CCDC88A, NF2, SMAD7, SMAD6, SMAD4, IGF1, PKN1, DOCK7, ADIPOQ, CCND1, HIPK3, PEBP1, TNK2, BMPR1A, CBS	1755	173	13528	1.42581	1	0.556922	50.7507
GOTERM_BP_FAT	GO:0000902~cell morphogenesis	59	2.62106	0.0375535	PLXNA3, UCHL1, PIP5K1C, CDC42, UNC5B, COL4A3BP, PRKCA, ARHGEF2, NRXN3, EFNB1, VANGL2, MYH9, STK4, MARK2, HES1, NCAM2, OPHN1, EFNA5, LAMC1, UBB, ADD1, BBS5, LIMS1, CDK5R1, SHROOM4, PTK7, CABP4, LLGL1, EPHB2, IGF1R, EZR, MACF1, BCL11B, CLASP1, PAFAH1B1, DCX, RUNX3, HNRNPAB, COL18A1, ACTB, PARD6B, KLF7, RAB8A, MAP1B, TRIM28, DPYSL5, ALMS1, DOCK7, RPL24, GAS1, WWTR1, DVL1, ATP7A, EPHA4, EPHA7, IFT172…	1755	356	13528	1.27749	1	0.55791	51.0269
GOTERM_BP_FAT	GO:0043068~positive regulation of programmed cell death	70	3.10973	0.0381006	FASTK, TP63, FASLG, PAWR, FOXO3, PTEN, CTNNBL1, AKT1, MEN1, BAK1, CUL5, DYNLL1, RPS3A, AEN, HMOX1, RPL11, FAS, MYC, DEDD2, PRKCA, BCL10, PPP2R1A, ARHGEF2, ARHGEF6, TP53, GRIN2A, STK4, BCL2L11, TNFRSF10B, HIPK1, TIAL1, EIF5AL1, MAPK9, MAPK8, UBB, UNC13B, PRODH, BID, CDK5R1, HOXA13, SOX4, STK17A, FEM1B, DPF1, TUBB, SH3GLB1, PPP2CA, DYRK2, PHLDA3, RUNX3, DNAJA3, TRAF3, COL18A1, TXNIP, B4GALT1, NACC1…	1755	433	13528	1.24614	1	0.56138	51.5435
GOTERM_BP_FAT	GO:0042127~regulation of cell proliferation	120	5.33096	0.0387813	IL6ST, OSMR, ATP6AP1, JAG2, HOXD13, MXI1, SSR1, CXCL10, CUL5, GLP2R, ASPH, SYK, GTPBP4, EFNB1, PPP1CB, SUZ12, HES1, EIF2AK1, TIMELESS, FGFR1OP, ADAMTS1, LAMC1, CNBP, EID2, BMPR2, SOX4, CHEK1, CALR, PIN1, HOXA3, AGGF1, NPM1, NKX3-1, RUNX3, DNAJA3, MAFG, B4GALT1, COL18A1, KLF10, TGFBR2, WDR6, TNFRSF13C, SMAD4, CD276, ITGA2, SKI, SMAD1, GAS1, TAX1BP3, FOXP1, NOTCH2, HDAC1, TSC1, DLX6, CHRNB2, LDOC1,…	1755	787	13528	1.17534	1	0.566064	52.1791
GOTERM_BP_FAT	GO:0045185~maintenance of protein location	12	0.533096	0.0401906	KDELR2, TLN1, EZR, MORC3, FGFR1OP, G3BP2, TMSB4X, FAF1, MXI1, KDELR1, FLNB, FLNA	1755	48	13528	1.92707	1	0.577444	53.47
GOTERM_BP_FAT	GO:0051651~maintenance of location in cell	12	0.533096	0.0401906	KDELR2, TLN1, EZR, MORC3, FGFR1OP, G3BP2, GAA, FAF1, MXI1, KDELR1, FLNB, FLNA	1755	48	13528	1.92707	1	0.577444	53.47
GOTERM_BP_FAT	GO:0051329~interphase of mitotic cell cycle	21	0.932919	0.0405657	KHDRBS1, BCAT1, CDC6, PPP6C, POLE, CHEK1, CDK4, RCC1, CDKN3, PPP1CB, CDC25A, AKT1, CCNB1, CCNE1, CUL5, CCND1, PPM1D, MDM2, ID4, KPNA2, DNM2	1755	103	13528	1.57159	1	0.579053	53.8079
GOTERM_BP_FAT	GO:0000079~regulation of cyclin-dependent protein kinase activity	13	0.577521	0.0409616	CDC6, GTPBP4, CDK5R1, CHEK1, CDKN3, PPP1CB, PTEN, CDC25A, CDC37, AKT1, MEN1, CCND1, CKS2	1755	54	13528	1.85569	1	0.580831	54.1622
GOTERM_BP_FAT	GO:0010942~positive regulation of cell death	70	3.10973	0.0422078	FASTK, TP63, FASLG, PAWR, FOXO3, PTEN, CTNNBL1, AKT1, MEN1, BAK1, CUL5, DYNLL1, RPS3A, AEN, HMOX1, RPL11, FAS, MYC, DEDD2, PRKCA, BCL10, PPP2R1A, ARHGEF2, ARHGEF6, TP53, GRIN2A, STK4, BCL2L11, TNFRSF10B, HIPK1, TIAL1, EIF5AL1, MAPK9, MAPK8, UBB, UNC13B, PRODH, BID, CDK5R1, HOXA13, SOX4, STK17A, FEM1B, DPF1, TUBB, SH3GLB1, PPP2CA, DYRK2, PHLDA3, RUNX3, DNAJA3, TRAF3, COL18A1, TXNIP, B4GALT1, NACC1…	1755	435	13528	1.24041	1	0.590177	55.2604
GOTERM_BP_FAT	GO:0051186~cofactor metabolic process	35	1.55486	0.042881	TALDO1, HMGCR, MTHFD1L, GSS, GSR, CBR1, FOLR1, HMOX1, GPX3, GLO1, NAPRT1, SHMT1, PDXK, ALDH5A1, SUCLG2, SUCLG1, CS, IREB2, ACACA, MTHFSD, ACLY, NADK, DLAT, COQ7, IDH3A, SOD2, ISCA1, KIAA0100, DBT, PANK2, PANK3, SLC25A38, NFE2L1, CTNS, GLYR1	1755	195	13528	1.38353	1	0.594268	55.8433
GOTERM_BP_FAT	GO:0051289~protein homotetramerization	8	0.355398	0.0430759	HSD17B10, SHMT1, PCBD2, ALDH5A1, GPX3, TP63, PFKM, SOD2	1755	26	13528	2.37177	1	0.594148	56.0107
GOTERM_BP_FAT	GO:0006695~cholesterol biosynthetic process	8	0.355398	0.0430759	CYB5R3, ACAA2, EBP, CNBP, APOA1, HMGCR, HMGCS1, DHCR24	1755	26	13528	2.37177	1	0.594148	56.0107
GOTERM_BP_FAT	GO:0043534~blood vessel endothelial cell migration	5	0.222124	0.0437917	APOA1, SCARB1, MYH9, SRF, FGF2	1755	11	13528	3.50376	1	0.598511	56.6203
GOTERM_BP_FAT	GO:0030850~prostate gland development	5	0.222124	0.0437917	AR, HOXA13, NKX3-1, TP63, HOXD13	1755	11	13528	3.50376	1	0.598511	56.6203
GOTERM_BP_FAT	GO:0006323~DNA packaging	23	1.02177	0.0451845	HIST1H2AB, HIST1H2AC, HIST2H2AA3, HIST1H1E, SHPRH, HIST1H2BD, HIST1H2AE, PAPD7, H1FX, TSPYL4, NCAPH, HIST1H1T, HIST1H2BN, NPM1, SMARCA5, HIST1H2AH, H3F3B, HIST1H4C, H2AFX, HIST1H3D, H3F3C, HIST1H2AM, HIST3H2BB, CHAF1A, CHAF1B	1755	117	13528	1.5153	1	0.608458	57.7838
GOTERM_BP_FAT	GO:0045429~positive regulation of nitric oxide biosynthetic process	7	0.310973	0.0455961	HSP90AB1, AKT1, ICAM1, HSP90AA1, DDAH1, HBB, SOD2	1755	21	13528	2.56942	1	0.61007	58.1219
GOTERM_BP_FAT	GO:0046856~phosphoinositide dephosphorylation	3	0.133274	0.046055	SYNJ2, PTEN, SACM1L	1755	3	13528	7.70826	1	0.612049	58.4959
GOTERM_BP_FAT	GO:0018076~N-terminal peptidyl-lysine acetylation	3	0.133274	0.046055	EP300, KAT2B, CREBBP	1755	3	13528	7.70826	1	0.612049	58.4959
GOTERM_BP_FAT	GO:0018394~peptidyl-lysine acetylation	3	0.133274	0.046055	EP300, KAT2B, CREBBP	1755	3	13528	7.70826	1	0.612049	58.4959
GOTERM_BP_FAT	GO:0042257~ribosomal subunit assembly	3	0.133274	0.046055	RPS14, RPS15, RPL24	1755	3	13528	7.70826	1	0.612049	58.4959
GOTERM_BP_FAT	GO:0046838~phosphorylated carbohydrate dephosphorylation	3	0.133274	0.046055	G6PC, SYNJ2, PTEN	1755	3	13528	7.70826	1	0.612049	58.4959
GOTERM_BP_FAT	GO:0002026~regulation of the force of heart contraction	6	0.266548	0.0465367	PRKCA, ATP2A2, GAA, PEBP1, ADRBK1, ATP1A1	1755	16	13528	2.8906	1	0.614185	58.8851
GOTERM_BP_FAT	GO:0006970~response to osmotic stress	9	0.399822	0.0473956	PDPK1, CUL5, TACR3, TP53, PKN1, TLR3, ITGA2, ICOSLG, AQP2	1755	32	13528	2.16795	1	0.6193	59.5704
GOTERM_BP_FAT	GO:0007416~synaptogenesis	9	0.399822	0.0473956	MYO6, NRXN3, SPOCK2, MAP1B, NLGN2, CDH1, CDH2, PCDHB11, CACNA1A	1755	32	13528	2.16795	1	0.6193	59.5704
GOTERM_BP_FAT	GO:0043066~negative regulation of apoptosis	58	2.57663	0.0479395	MEF2C, XRCC2, NUAK2, TP63, NFKB1, CIAPIN1, PTEN, AKT1, G2E3, HMOX1, CHST11, TPT1, FAS, MYC, DHCR24, IRAK1, CDK1, BCL10, SGK3, BARHL1, TP53, PIM3, ESR2, BTG2, BNIP2, TNFRSF10D, HIPK3, MAPK8, UBB, CLN8, GSTP1, HMGB1, YWHAZ, XIAP, MCL1, SOX4, HSPA1B, IGF1R, SH3GLB1, BCL11B, NPM1, GLO1, THBS1, RASA1, DNAJA3, ARHGDIA, CEBPB, SMAD6, IGF1, ATM, SOD2, NRAS, NOTCH2, BFAR, HSP90B1, HDAC1, GSK3B, CACNA1A	1755	354	13528	1.26294	1	0.621835	59.9987
GOTERM_BP_FAT	GO:0032989~cellular component morphogenesis	64	2.84318	0.0494931	PLXNA3, UCHL1, PIP5K1C, CDC42, BAK1, UNC5B, COL4A3BP, PRKCA, ARHGEF2, NRXN3, EFNB1, VANGL2, MYH9, STK4, UBE2B, MARK2, HES1, MFN2, NCAM2, MFN1, OPHN1, EFNA5, LAMC1, UBB, ADD1, BBS5, CDK5R1, LIMS1, SHROOM4, PTK7, CABP4, LLGL1, EPHB2, IGF1R, EZR, MACF1, BCL11B, PAFAH1B1, CLASP1, DCX, RUNX3, HNRNPAB, COL18A1, ACTB, PARD6B, KLF7, RAB8A, MAP1B, TRIM28, DPYSL5, ALMS1, DOCK7, RPL24, GAS1, WWTR1, DVL1, AT…	1755	397	13528	1.24264	1	0.632109	61.1988
GOTERM_BP_FAT	GO:0030324~lung development	20	0.888494	0.0499442	WNT5A, TGFBR2, BMPR2, ASAH1, FOXP1, HES1, ATP7A, MAN2A1, EP300, TIMELESS, HOXA5, JMJD6, CRISPLD2, GATA6, HHIP, CUX1, FGF2, NFIB, SIM2, BMPR1A	1755	99	13528	1.55722	1	0.633786	61.5409
GOTERM_BP_FAT	GO:0060260~regulation of transcription initiation from RNA polymerase II promoter	4	0.177699	0.050862	ATF7IP, HMGB1, SRF, AHR	1755	7	13528	4.40472	1	0.638921	62.2279
GOTERM_BP_FAT	GO:0010149~senescence	4	0.177699	0.050862	CALR, SRF, TERF2, SOD2	1755	7	13528	4.40472	1	0.638921	62.2279
GOTERM_BP_FAT	GO:0006002~fructose 6-phosphate metabolic process	4	0.177699	0.050862	TALDO1, GFPT1, GFPT2, PFKM	1755	7	13528	4.40472	1	0.638921	62.2279
GOTERM_BP_FAT	GO:0035148~tube lumen formation	11	0.488672	0.0516164	PFN1, BCL10, TSC1, VANGL2, ZIC5, IFT172, PTK7, CELSR1, BCL2L11, FZD6, HECTD1	1755	44	13528	1.92707	1	0.642751	62.784
GOTERM_BP_FAT	GO:0006284~base-excision repair	8	0.355398	0.0518783	HMGB1, MPG, POLG, TP53, WRN, NTHL1, APEX1, PARP2	1755	27	13528	2.28393	1	0.642939	62.9751
GOTERM_BP_FAT	GO:0000082~G1/S transition of mitotic cell cycle	13	0.577521	0.0524188	BCAT1, PPP6C, POLE, RCC1, CDK4, CDKN3, PPP1CB, CDC25A, AKT1, CCNE1, CUL5, CCND1, ID4	1755	56	13528	1.78942	1	0.64514	63.3668
GOTERM_BP_FAT	GO:0007088~regulation of mitosis	13	0.577521	0.0524188	HOXA13, NEK2, IGF1, ESPL1, RCC1, ATM, PIN1, CDC42, BUB1, HECTD3, PEBP1, TGFA, NEK6	1755	56	13528	1.78942	1	0.64514	63.3668
GOTERM_BP_FAT	GO:0051783~regulation of nuclear division	13	0.577521	0.0524188	HOXA13, NEK2, IGF1, ESPL1, RCC1, ATM, PIN1, CDC42, BUB1, HECTD3, PEBP1, TGFA, NEK6	1755	56	13528	1.78942	1	0.64514	63.3668
GOTERM_BP_FAT	GO:0051325~interphase	21	0.932919	0.0526271	KHDRBS1, BCAT1, CDC6, PPP6C, POLE, CHEK1, CDK4, RCC1, CDKN3, PPP1CB, CDC25A, AKT1, CCNB1, CCNE1, CUL5, CCND1, PPM1D, MDM2, ID4, KPNA2, DNM2	1755	106	13528	1.52711	1	0.644933	63.5168
GOTERM_BP_FAT	GO:0051028~mRNA transport	18	0.799645	0.0530529	PABPN1, HNRNPA1L2, XPO1, UPF2, NUP98, MYO1C, G3BP2, NUP93, SMG1, NUP155, HNRNPA1, RBM8A, NUP210, EIF5AL1, NUP205, KHSRP, RANBP2, NUP43	1755	87	13528	1.59481	1	0.646279	63.8213
GOTERM_BP_FAT	GO:0019318~hexose metabolic process	34	1.51044	0.0539174	ALDOA, PPARD, TALDO1, IL6ST, UGDH, GALK2, AKT1, PPP1R3D, PPP1R3B, PGAM4, FUT2, DHTKD1, GAPDH, MYC, ENO1, B4GALT1, WDTC1, ALDH5A1, FUT10, DLAT, PFKM, PPP1CC, ADIPOQ, PPP1CB, MAN2A1, G6PC, PYGL, GSK3B, GFPT1, GFPT2, GAA, PGK1, GLYR1, CACNA1A	1755	192	13528	1.365	1	0.650696	64.4325
GOTERM_BP_FAT	GO:0007059~chromosome segregation	17	0.75522	0.0545258	KIFC1, PDS5B, NEK2, DSN1, USP9X, PAPD7, ESPL1, SMC3, NCAPH, RAD21, ZWINT, INCENP, ARL8B, SMC1A, NUP43, NEK6, STAG1	1755	81	13528	1.61778	1	0.653253	64.8566
GOTERM_BP_FAT	GO:0014020~primary neural tube formation	9	0.399822	0.0557262	PFN1, BCL10, TSC1, VANGL2, ZIC5, PTK7, CELSR1, FZD6, HECTD1	1755	33	13528	2.10225	1	0.659805	65.6795
GOTERM_BP_FAT	GO:0051098~regulation of binding	28	1.24389	0.0578009	TMEM189-UBE2V1, UBE2V1, TLR3, FKBP1A, TRIB1, MEN1, BAK1, IRAK3, SUMO1, HMOX1, NPM1, APEX1, DNAJA3, IRAK1, BCL10, ICAM1, GTPBP4, SMAD7, SMAD4, ITGA2, SKI, TMEM189, LDLRAP1, FLNA, EP300, AIDA, NCOA3, ERC1, CALM1, ADD1	1755	153	13528	1.41066	1	0.671931	67.059
GOTERM_BP_FAT	GO:0051262~protein tetramerization	10	0.444247	0.0579196	HSD17B10, IGF1R, SHMT1, PCBD2, ALDH5A1, GPX3, TP53, TP63, PFKM, SOD2	1755	39	13528	1.97648	1	0.671053	67.1363
GOTERM_BP_FAT	GO:0008283~cell proliferation	69	3.0653	0.0579203	TUSC2, PPARD, ELF4, OSMR, UCHL1, TP63, TXLNA, PTEN, KIF2C, BAK1, CUL5, APOA1, MCM7, EVI5, HMOX1, COL4A3BP, INSIG1, TGFA, FRAT2, E4F1, HHIP, MYC, SYK, KHDRBS1, AR, PDXK, RXRB, SOX11, TP53, CDK9, RBBP7, IFNAR2, GLUL, PA2G4, CHRM3, CDK11A, MAPRE2, MAPRE1, EMP1, CXCL1, BCAT1, CDK5R1, CDV3, CEP120, HDGF, FKBP1A, PDAP1, SRRT, BUB1, PAFAH1B1, SCARB1, RUNX3, TFDP1, PDS5B, NF2, MKI67, TAF8, KLF10, CREBBP,…	1755	436	13528	1.21989	1	0.669413	67.1368
GOTERM_BP_FAT	GO:0043069~negative regulation of programmed cell death	58	2.57663	0.0587053	MEF2C, XRCC2, NUAK2, TP63, NFKB1, CIAPIN1, PTEN, AKT1, G2E3, HMOX1, CHST11, TPT1, FAS, MYC, DHCR24, IRAK1, CDK1, BCL10, SGK3, BARHL1, TP53, PIM3, ESR2, BTG2, BNIP2, TNFRSF10D, HIPK3, MAPK8, UBB, CLN8, GSTP1, HMGB1, YWHAZ, XIAP, MCL1, SOX4, HSPA1B, IGF1R, SH3GLB1, BCL11B, NPM1, GLO1, THBS1, RASA1, DNAJA3, ARHGDIA, CEBPB, SMAD6, IGF1, ATM, SOD2, NRAS, NOTCH2, BFAR, HSP90B1, HDAC1, GSK3B, CACNA1A	1755	359	13528	1.24535	1	0.672852	67.6438
GOTERM_BP_FAT	GO:0034330~cell junction organization	13	0.577521	0.0588886	PARD6B, TLN1, GJD3, TAOK2, NF2, SMAD7, NLGN2, ITGB3, CDC42, PDPK1, TNS1, ITGA5, LAMC1	1755	57	13528	1.75802	1	0.672398	67.7611
GOTERM_BP_FAT	GO:0045787~positive regulation of cell cycle	13	0.577521	0.0588886	AKT1, CCND1, HOXA13, SMAD6, TGFA, PEBP1, MDM2, IGF1, HCFC1, RPS15A, ESPL1, CALR, PPP1CB	1755	57	13528	1.75802	1	0.672398	67.7611
GOTERM_BP_FAT	GO:0018205~peptidyl-lysine modification	6	0.266548	0.0591199	ATP7A, EP300, KAT2B, JMJD6, EIF5AL1, CREBBP	1755	17	13528	2.72056	1	0.672255	67.9086
GOTERM_BP_FAT	GO:0030512~negative regulation of transforming growth factor beta receptor signaling pathway	6	0.266548	0.0591199	DAND5, PEG10, EID2, CHST11, SKI, PIN1	1755	17	13528	2.72056	1	0.672255	67.9086
GOTERM_BP_FAT	GO:0035239~tube morphogenesis	24	1.06619	0.059383	B4GALT1, BCL10, BBS5, TGFBR2, VANGL2, PTK7, SMAD4, HOXD13, TP63, IGF1, CELSR1, SRF, BCL2L11, FZD6, PFN1, TIMELESS, TSC1, HAND1, HOXA5, HAND2, IFT172, ZIC5, NKX3-1, HECTD1	1755	127	13528	1.45668	1	0.672314	68.0755
GOTERM_BP_FAT	GO:0051052~regulation of DNA metabolic process	22	0.977343	0.0596125	SMARCAD1, CDC6, PPP2R1A, GTPBP4, CCDC88A, BRCC3, TMEM189-UBE2V1, MSH3, NF2, WRNIP1, MRE11A, TP53, UBE2V1, IGF1, TMEM189, CALR, RAD51, CDT1, IGF1R, PPP2CA, H2AFX, KPNA2, MYC, TERF2	1755	114	13528	1.48756	1	0.672161	68.2204
GOTERM_BP_FAT	GO:0060548~negative regulation of cell death	58	2.57663	0.0616041	MEF2C, XRCC2, NUAK2, TP63, NFKB1, CIAPIN1, PTEN, AKT1, G2E3, HMOX1, CHST11, TPT1, FAS, MYC, DHCR24, IRAK1, CDK1, BCL10, SGK3, BARHL1, TP53, PIM3, ESR2, BTG2, BNIP2, TNFRSF10D, HIPK3, MAPK8, UBB, CLN8, GSTP1, HMGB1, YWHAZ, XIAP, MCL1, SOX4, HSPA1B, IGF1R, SH3GLB1, BCL11B, NPM1, GLO1, THBS1, RASA1, DNAJA3, ARHGDIA, CEBPB, SMAD6, IGF1, ATM, SOD2, NRAS, NOTCH2, BFAR, HSP90B1, HDAC1, GSK3B, CACNA1A	1755	360	13528	1.24189	1	0.68294	69.4526
GOTERM_BP_FAT	GO:0032990~cell part morphogenesis	43	1.91026	0.062676	BBS5, CDK5R1, PLXNA3, UCHL1, PIP5K1C, EPHB2, IGF1R, BAK1, MACF1, UNC5B, BCL11B, COL4A3BP, PAFAH1B1, DCX, RUNX3, PRKCA, ACTB, PARD6B, KLF7, RAB8A, NRXN3, EFNB1, MAP1B, VANGL2, DPYSL5, ALMS1, DOCK7, RPL24, GAS1, WWTR1, DVL1, ATP7A, MFN2, MFN1, NCAM2, EPHA4, EPHA7, IFT172, OPHN1, EFNA5, CHRNB2, UBB, CACNA1A	1755	256	13528	1.29475	1	0.687837	70.0969
GOTERM_BP_FAT	GO:0009116~nucleoside metabolic process	14	0.621946	0.0646897	ERH, MAT2A, HMGCR, RP2, ACLY, QTRT1, TYMP, UMPS, PANK2, PANK3, ADK, DHODH, MTAP, MAT2B	1755	64	13528	1.68618	1	0.698114	71.2726
GOTERM_BP_FAT	GO:0017157~regulation of exocytosis	9	0.399822	0.0649315	PRKCA, B4GALT1, RAB3D, HMOX1, RPH3AL, FGF2, NSF, CACNA1A, SYK	1755	34	13528	2.04042	1	0.697947	71.4108
GOTERM_BP_FAT	GO:0030518~steroid hormone receptor signaling pathway	13	0.577521	0.0658688	CCNE1, AR, RNF4, NCOA3, MED16, EGLN2, PIAS2, ARID1A, MED13, ESR2, CALR, CARM1, PMEPA1	1755	58	13528	1.72771	1	0.70175	71.9406
GOTERM_BP_FAT	GO:0021953~central nervous system neuron differentiation	10	0.444247	0.0665014	PRKCA, ATP7A, PLXNA3, GNAQ, BCL11B, PAFAH1B1, CHRNB2, DCX, CACNA1A, EPHB2	1755	40	13528	1.92707	1	0.703773	72.2929
GOTERM_BP_FAT	GO:0001841~neural tube formation	10	0.444247	0.0665014	PFN1, BCL10, TSC1, VANGL2, ZIC5, IFT172, PTK7, CELSR1, FZD6, HECTD1	1755	40	13528	1.92707	1	0.703773	72.2929
GOTERM_BP_FAT	GO:0009119~ribonucleoside metabolic process	11	0.488672	0.0669701	PANK2, UMPS, PANK3, MAT2A, HMGCR, ADK, RP2, DHODH, ACLY, MAT2B, QTRT1	1755	46	13528	1.84328	1	0.704856	72.5512
GOTERM_BP_FAT	GO:0006091~generation of precursor metabolites and energy	51	2.26566	0.0674466	PPARD, IL6ST, ATP6AP1, ATP5B, UQCRQ, AKT1, NDUFS5, PGAM4, SLC25A3, DHTKD1, ATP5J, NDUFB10, SUCLG2, ALDH5A1, SUCLG1, CYCS, COX4I1, CYB5A, PFKM, PPP1CC, PPP1CB, KIAA0100, ATP6V1A, G6PC, GAA, CYBRD1, ACAA1, UQCRB, ALDOA, ATP5G3, PPP1R3D, PPP1R3B, GAPDH, ENO1, ETFA, NDUFA5, NDUFA7, CS, DLAT, ADIPOQ, IDH3A, SOD2, FRRS1, NDUFV3, PYGL, GSK3B, GFPT1, GFPT2, COX6A1, ATP5A1, PGK1	1755	313	13528	1.25598	1	0.705971	72.8114
GOTERM_BP_FAT	GO:0006917~induction of apoptosis	52	2.31008	0.0675062	FASTK, TP63, FASLG, FOXO3, PTEN, BAK1, CUL5, RPS3A, HMOX1, AEN, RPL11, FAS, MYC, DEDD2, PRKCA, BCL10, PPP2R1A, ARHGEF2, ARHGEF6, TP53, BCL2L11, TNFRSF10B, HIPK1, TIAL1, EIF5AL1, MAPK9, MAPK8, UBB, UNC13B, PRODH, BID, STK17A, FEM1B, DPF1, TUBB, SH3GLB1, PPP2CA, DYRK2, PHLDA3, RUNX3, TRAF3, NACC1, VAV3, CEBPB, KLF10, TRIO, SAP30BP, YWHAE, ATM, CIDEC, NOTCH2, IKBKG	1755	320	13528	1.25259	1	0.704778	72.8439
GOTERM_BP_FAT	GO:0007044~cell-substrate junction assembly	7	0.310973	0.0678461	TLN1, PDPK1, TNS1, TAOK2, ITGA5, LAMC1, ITGB3	1755	23	13528	2.34599	1	0.705135	73.0279
GOTERM_BP_FAT	GO:0035264~multicellular organism growth	7	0.310973	0.0678461	WDTC1, SLC1A2, G6PC, HOXA5, IGF1, ADD1, PLEKHA1	1755	23	13528	2.34599	1	0.705135	73.0279
GOTERM_BP_FAT	GO:0007178~transmembrane receptor protein serine/threonine kinase signaling pathway	20	0.888494	0.0697462	TWSG1, IRAK1, EID2, SMAD9, SMAD7, KLF10, SMAD6, USP9X, TGFBR2, BMPR2, SMAD4, FKBP1A, SKI, SMAD1, CHRDL1, ZFYVE16, TGFBRAP1, PPM1L, TOB1, BMPR1A	1755	103	13528	1.49675	1	0.71391	74.035
GOTERM_BP_FAT	GO:0007167~enzyme linked receptor protein signaling pathway	55	2.44336	0.0704774	NDST1, IL6ST, EFNA1, ATP6AP1, SHOC2, PTEN, AKT1, EIF4EBP1, EIF4EBP2, ZFYVE16, SHC3, RAPGEF1, FGF2, GNG7, SYK, PTPRJ, IRAK1, SOCS5, FLNA, CD3EAP, CHRDL1, PPM1L, TGFBRAP1, TWSG1, EID2, ADCYAP1R1, USP9X, BMPR2, TFG, FKBP1A, PXN, EPHB2, IGF1R, GIGYF1, TXNIP, CAMLG, PTPRE, SMAD9, SMAD7, KLF10, SMAD6, TGFBR2, SMAD4, TRIO, SKI, SMAD1, APPL1, STAT3, DVL1, EPHA4, EPHA7, CACNA1A, TOB1, PLEKHA1, BMPR1A	1755	342	13528	1.23963	1	0.716286	74.4131
GOTERM_BP_FAT	GO:0012502~induction of programmed cell death	52	2.31008	0.0705349	FASTK, TP63, FASLG, FOXO3, PTEN, BAK1, CUL5, RPS3A, HMOX1, AEN, RPL11, FAS, MYC, DEDD2, PRKCA, BCL10, PPP2R1A, ARHGEF2, ARHGEF6, TP53, BCL2L11, TNFRSF10B, HIPK1, TIAL1, EIF5AL1, MAPK9, MAPK8, UBB, UNC13B, PRODH, BID, STK17A, FEM1B, DPF1, TUBB, SH3GLB1, PPP2CA, DYRK2, PHLDA3, RUNX3, TRAF3, NACC1, VAV3, CEBPB, KLF10, TRIO, SAP30BP, YWHAE, ATM, CIDEC, NOTCH2, IKBKG	1755	321	13528	1.24869	1	0.715102	74.4426
GOTERM_BP_FAT	GO:0030217~T cell differentiation	14	0.621946	0.0716917	ATP7A, CD3D, JMJD6, RPL22, BCL11B, BCL11A, JAG2, TP53, MINK1, SOX4, PATZ1, FAS, DNAJA3, SYK	1755	65	13528	1.66024	1	0.719652	75.0293
GOTERM_BP_FAT	GO:0046128~purine ribonucleoside metabolic process	8	0.355398	0.0726485	PANK2, PANK3, MAT2A, HMGCR, ADK, ACLY, MAT2B, QTRT1	1755	29	13528	2.12642	1	0.723085	75.505
GOTERM_BP_FAT	GO:0042278~purine nucleoside metabolic process	8	0.355398	0.0726485	PANK2, PANK3, MAT2A, HMGCR, ADK, ACLY, MAT2B, QTRT1	1755	29	13528	2.12642	1	0.723085	75.505
GOTERM_BP_FAT	GO:0007254~JNK cascade	13	0.577521	0.0733687	WNT5A, ARHGEF6, MAP2K4, DUSP10, PKN1, MINK1, TRIB1, MAP3K6, CRKL, MAP3K4, MAPK9, MAPK8, SYK	1755	59	13528	1.69843	1	0.725267	75.8574
GOTERM_BP_FAT	GO:0009303~rRNA transcription	6	0.266548	0.0734448	CD3EAP, BRF1, TCOF1, TP53, GTF3C2, GTF3C1	1755	18	13528	2.56942	1	0.724197	75.8944
GOTERM_BP_FAT	GO:0008088~axon cargo transport	6	0.266548	0.0734448	KIF1A, KIF1B, MACF1, UCHL1, PAFAH1B1, KLC2	1755	18	13528	2.56942	1	0.724197	75.8944
GOTERM_BP_FAT	GO:0021694~cerebellar Purkinje cell layer formation	4	0.177699	0.0737099	ATP7A, AGTPBP1, RORA, CACNA1A	1755	8	13528	3.85413	1	0.724081	76.0227
GOTERM_BP_FAT	GO:0001960~negative regulation of cytokine-mediated signaling pathway	4	0.177699	0.0737099	IRAK3, IL6ST, ADIPOQ, DNAJA3	1755	8	13528	3.85413	1	0.724081	76.0227
GOTERM_BP_FAT	GO:0021702~cerebellar Purkinje cell differentiation	4	0.177699	0.0737099	ATP7A, AGTPBP1, RORA, CACNA1A	1755	8	13528	3.85413	1	0.724081	76.0227
GOTERM_BP_FAT	GO:0007183~SMAD protein complex assembly	4	0.177699	0.0737099	EID2, SMAD4, FKBP1A, SMAD1	1755	8	13528	3.85413	1	0.724081	76.0227
GOTERM_BP_FAT	GO:0021692~cerebellar Purkinje cell layer morphogenesis	4	0.177699	0.0737099	ATP7A, AGTPBP1, RORA, CACNA1A	1755	8	13528	3.85413	1	0.724081	76.0227
GOTERM_BP_FAT	GO:0031122~cytoplasmic microtubule organization	4	0.177699	0.0737099	CEP120, MACF1, STMN3, HOOK3	1755	8	13528	3.85413	1	0.724081	76.0227
GOTERM_BP_FAT	GO:0030155~regulation of cell adhesion	25	1.11062	0.0753381	PPP2R1A, ICAM1, GTPBP4, EMCN, ADAM10, VAV3, NF2, SRCIN1, SMAD7, ATP5B, HSD17B12, CCDC80, JAG2, ITGA2, CD164, ADIPOQ, PTEN, MIA3, TSC1, SAA1, PPP2CA, FAF1, THBS1, ARHGDIA, RASA1	1755	137	13528	1.40662	1	0.730692	76.7967
GOTERM_BP_FAT	GO:0050679~positive regulation of epithelial cell proliferation	10	0.444247	0.0758409	B4GALT1, DLX6, ATP6AP1, TGFA, IGF1, LAMC1, GAS1, FGF2, FOXP1, BMPR1A	1755	41	13528	1.88006	1	0.731709	77.0309
GOTERM_BP_FAT	GO:0034329~cell junction assembly	10	0.444247	0.0758409	PARD6B, TLN1, PDPK1, TNS1, GJD3, TAOK2, ITGA5, SMAD7, LAMC1, ITGB3	1755	41	13528	1.88006	1	0.731709	77.0309
GOTERM_BP_FAT	GO:0010035~response to inorganic substance	35	1.55486	0.0768989	ADRBK1, PTEN, AQP3, PXN, SLC11A2, GSS, SRRT, HMOX1, GPX3, THBS1, FANCC, TXNIP, PRKCA, ACTB, BSG, MAP1B, MTL5, APTX, ITPR3, PARK7, SREBF2, SOD2, ATP7A, CCND1, EP300, NPTXR, MTF1, ANXA11, AS3MT, CYBRD1, PEBP1, MAPK9, MAPK8, PPP1R15B, CALM1	1755	205	13528	1.31604	1	0.735372	77.5164
GOTERM_BP_FAT	GO:0015980~energy derivation by oxidation of organic compounds	26	1.15504	0.0769292	IL6ST, AKT1, PPP1R3D, NDUFS5, PPP1R3B, NDUFA5, NDUFB10, SUCLG2, ALDH5A1, SUCLG1, CYCS, CS, NDUFA7, PPP1CC, PPP1CB, IDH3A, SOD2, KIAA0100, NDUFV3, G6PC, PYGL, GSK3B, GFPT1, GFPT2, GAA, UQCRB	1755	144	13528	1.39177	1	0.734106	77.5302
GOTERM_BP_FAT	GO:0006972~hyperosmotic response	5	0.222124	0.0769342	PDPK1, TACR3, PKN1, TLR3, ICOSLG	1755	13	13528	2.96472	1	0.732722	77.5324
GOTERM_BP_FAT	GO:0030866~cortical actin cytoskeleton organization	5	0.222124	0.0769342	EPB41L3, TLN1, CALR, EHD2, LLGL1	1755	13	13528	2.96472	1	0.732722	77.5324
GOTERM_BP_FAT	GO:0006468~protein amino acid phosphorylation	100	4.44247	0.0781347	PRPF4B, STK38, EFNA1, DSTYK, AURKA, AURKB, MAP3K6, MAP3K4, AAK1, COL4A3BP, SYK, IKBKAP, TWF1, STK25, CSNK1G2, PIM3, STK4, WEE1, MARK2, EIF2AK1, SCYL2, TESK1, NEK9, MAPK9, MAPK8, ERC1, NEK6, CDK5R1, NEK2, BMPR2, PTK7, CHEK1, ADRBK1, STK17A, EPHB2, CAMKV, IRAK3, SBK1, DYRK2, ITK, TAOK2, TAOK1, SMAD7, TGFBR2, MAP2K4, TRIO, SMG1, ATM, EPHA4, EPHA7, PLK1, DYRK1B, DYRK1A, TNK2, ABL2, GRK1, NUAK2, FASTK…	1755	667	13528	1.15566	1	0.736999	78.0712
GOTERM_BP_FAT	GO:0008361~regulation of cell size	35	1.55486	0.0811117	EXTL3, PLXNA3, TNFRSF12A, TP63, AKT1, NDRG3, PPP2CA, NPM1, SERTAD3, GNG4, DCX, FGF2, SERTAD2, ENO1, PPP2R1A, WDTC1, AR, ADAM10, MAP1B, SMAD4, SLC3A2, TP53, NPR1, SOCS5, ESR2, DDX5, CDK4, NOTCH2, EP300, TSC1, CXCL16, CLN8, CACNA1A, EMP1, SLC9A1	1755	206	13528	1.30966	1	0.749227	79.355
GOTERM_BP_FAT	GO:0016310~phosphorylation	118	5.24211	0.0832422	PRPF4B, STK38, EFNA1, ATP6AP1, DSTYK, AURKA, AURKB, MAP3K6, MAP3K4, AAK1, COL4A3BP, SYK, IKBKAP, TWF1, STK25, CSNK1G2, PIM3, STK4, WEE1, MARK2, EIF2AK1, SCYL2, TESK1, MAPK9, NEK9, MAPK8, ERC1, NEK6, CDK5R1, NEK2, PTK7, BMPR2, CHEK1, ADRBK1, STK17A, EPHB2, CAMKV, IRAK3, SBK1, DYRK2, ITK, TAOK2, TAOK1, SMAD7, TGFBR2, MAP2K4, TRIO, SMG1, ATM, NDUFV3, EPHA4, EPHA7, PLK1, DYRK1B, DYRK1A, FUK, TNK2, PI…	1755	800	13528	1.13697	1	0.757213	80.2297
GOTERM_BP_FAT	GO:0008629~induction of apoptosis by intracellular signals	12	0.533096	0.0833715	PRKCA, CUL5, HIPK1, HMOX1, AEN, TP53, TP63, DYRK2, PHLDA3, MYC, ATM, PRODH	1755	54	13528	1.71295	1	0.756419	80.2817
GOTERM_BP_FAT	GO:0045898~regulation of transcriptional preinitiation complex assembly	3	0.133274	0.0842496	ATF7IP, HMGB1, AHR	1755	4	13528	5.7812	1	0.758836	80.631
GOTERM_BP_FAT	GO:0060334~regulation of interferon-gamma-mediated signaling pathway	3	0.133274	0.0842496	HSP90AB1, DNAJA3, CDC37	1755	4	13528	5.7812	1	0.758836	80.631
GOTERM_BP_FAT	GO:0042518~negative regulation of tyrosine phosphorylation of Stat3 protein	3	0.133274	0.0842496	PPP2R1A, NF2, PPP2CA	1755	4	13528	5.7812	1	0.758836	80.631
GOTERM_BP_FAT	GO:0034383~low-density lipoprotein particle clearance	3	0.133274	0.0842496	LDLR, HMOX1, ADIPOQ	1755	4	13528	5.7812	1	0.758836	80.631
GOTERM_BP_FAT	GO:0000320~re-entry into mitotic cell cycle	3	0.133274	0.0842496	CCND1, GSK3B, CCNF	1755	4	13528	5.7812	1	0.758836	80.631
GOTERM_BP_FAT	GO:0002377~immunoglobulin production	8	0.355398	0.0846323	POLL, TRAF3IP2, GALNT2, MSH3, LAX1, FAS, FOXP1, CTNNBL1	1755	30	13528	2.05554	1	0.759124	80.7814
GOTERM_BP_FAT	GO:0045768~positive regulation of anti-apoptosis	8	0.355398	0.0846323	BTG2, SMAD7, IL6ST, HMOX1, SMAD1, ERC1, RASA1, SLC9A1	1755	30	13528	2.05554	1	0.759124	80.7814
GOTERM_BP_FAT	GO:0006368~RNA elongation from RNA polymerase II promoter	11	0.488672	0.0849575	GTF2E1, ADRM1, POLR2F, POLR2E, GTF2A1, POLR2L, POLR2I, TCEB2, TCEB3, CDK9, SUPT5H	1755	48	13528	1.76648	1	0.759167	80.9083
GOTERM_BP_FAT	GO:0006888~ER to Golgi vesicle-mediated transport	10	0.444247	0.0859431	COG3, SEC24A, ATL3, GOSR1, SAR1B, SAR1A, ERGIC1, ERGIC2, SPAST, TRAPPC2	1755	42	13528	1.8353	1	0.761973	81.2883
GOTERM_BP_FAT	GO:0001776~leukocyte homeostasis	9	0.399822	0.0860062	MEN1, AKT1, BAK1, IKBKG, TNFRSF13C, FAS, DNAJA3, BCL2L11, FANCC	1755	36	13528	1.92707	1	0.760918	81.3124
GOTERM_BP_FAT	GO:0030521~androgen receptor signaling pathway	9	0.399822	0.0860062	CCNE1, AR, RNF4, NCOA3, MED16, PIAS2, ARID1A, MED13, PMEPA1	1755	36	13528	1.92707	1	0.760918	81.3124
GOTERM_BP_FAT	GO:0043086~negative regulation of catalytic activity	45	1.99911	0.0878005	HMGCR, NFKB1, FKBP1A, PSMA7, TRIB1, MEN1, AKT1, PSMF1, IRAK3, PDPK1, APOA1, PSMB6, PSMB1, PPP2CA, PSMD2, PSMD3, MLLT1, PSMD5, SPRED1, ANGPTL3, GCHFR, DNAJA3, DHCR24, PRKCA, PPP2R1A, NF2, SMAD7, SMAD6, TP53, CST3, CDC20, CDC27, PKIA, FLNA, DVL1, PSMB9, ATP7A, PSMC3, LAX1, PSMD11, PSMA4, HIPK3, PSME3, UBB, CLN8	1755	277	13528	1.25224	1	0.766976	81.9849
GOTERM_BP_FAT	GO:0006006~glucose metabolic process	27	1.19947	0.088624	ALDOA, PPARD, TALDO1, IL6ST, UGDH, AKT1, PPP1R3D, PPP1R3B, PGAM4, DHTKD1, MYC, GAPDH, ENO1, WDTC1, ALDH5A1, PFKM, DLAT, PPP1CC, ADIPOQ, PPP1CB, G6PC, PYGL, GSK3B, GAA, PGK1, GLYR1, CACNA1A	1755	153	13528	1.36028	1	0.768995	82.2858
GOTERM_BP_FAT	GO:0006891~intra-Golgi vesicle-mediated transport	6	0.266548	0.0894781	COG3, GABARAPL2, GOSR1, OPTN, CUX1, GOLGA3	1755	19	13528	2.43419	1	0.771105	82.5929
GOTERM_BP_FAT	GO:0006383~transcription from RNA polymerase III promoter	6	0.266548	0.0894781	BRF1, POLR3K, CRCP, GTF3C2, GTF3C1, POLR3D	1755	19	13528	2.43419	1	0.771105	82.5929
GOTERM_BP_FAT	GO:0016055~Wnt receptor signaling pathway	24	1.06619	0.0899094	WNT5A, WNT10A, APC2, CSNK1G2, LY6G5B, BTRC, TLE3, CTNND1, SOX4, TAX1BP3, UBE2B, FZD6, DVL1, WNT7B, CCND1, MACF1, NXN, GSK3B, LRP6, FRAT2, HBP1, TBL1X, AXIN1, BCL9	1755	133	13528	1.39096	1	0.771526	82.746
GOTERM_BP_FAT	GO:0030100~regulation of endocytosis	13	0.577521	0.089952	PRKCA, C3, ATP6AP1, RAB4A, ZFYVE16, ITGA2, SCARB1, CLEC7A, CALR, CD2AP, LDLRAP1, ADIPOQ, PTEN	1755	61	13528	1.64274	1	0.770417	82.7611
GOTERM_BP_FAT	GO:0050808~synapse organization	13	0.577521	0.089952	MYO6, SPOCK2, NRXN3, MAP1B, NLGN2, CDH1, CDH2, PCDHB11, DVL1, WNT7B, TSC1, DNAJA3, CACNA1A	1755	61	13528	1.64274	1	0.770417	82.7611
GOTERM_BP_FAT	GO:0006469~negative regulation of protein kinase activity	17	0.75522	0.0924083	PRKCA, PPP2R1A, NF2, HMGCR, PKIA, TRIB1, DVL1, AKT1, MEN1, IRAK3, PDPK1, LAX1, HIPK3, PPP2CA, MLLT1, SPRED1, DNAJA3	1755	87	13528	1.50621	1	0.778647	83.6085
GOTERM_BP_FAT	GO:0043122~regulation of I-kappaB kinase/NF-kappaB cascade	20	0.888494	0.094284	MAVS, BCL10, SECTM1, TMEM189-UBE2V1, SLC20A1, UBE2V1, FASLG, TFG, TLR3, FKBP1A, TMEM189, ADIPOQ, FLNA, TRAF3IP2, TNFRSF10B, REL, HMOX1, SHISA5, OTUD7B, DNAJA3, NEK6, GPR89A	1755	107	13528	1.4408	1	0.784415	84.2289
GOTERM_BP_FAT	GO:0051789~response to protein stimulus	20	0.888494	0.094284	HSP90AB1, HSP90AA1, LY6G5B, KLF10, MAP1B, ITGA2, CLIC1, HSPA1B, VARS, EDEM1, ERP44, HSPH1, CCND1, TOR1B, HSPA6, CREB3L2, FAS, DNAJB4, UBXN4, HSPA8	1755	107	13528	1.4408	1	0.784415	84.2289
GOTERM_BP_FAT	GO:0048667~cell morphogenesis involved in neuron differentiation	35	1.55486	0.0946917	PLXNA3, CDK5R1, UCHL1, PIP5K1C, CABP4, EPHB2, IGF1R, MACF1, UNC5B, BCL11B, PAFAH1B1, DCX, RUNX3, PRKCA, ACTB, PARD6B, KLF7, NRXN3, EFNB1, MAP1B, DPYSL5, DOCK7, RPL24, GAS1, DVL1, HES1, NCAM2, EPHA4, EPHA7, OPHN1, EFNA5, CHRNB2, UBB, CACNA1A, GRK1	1755	209	13528	1.29086	1	0.784679	84.3608
GOTERM_BP_FAT	GO:0045944~positive regulation of transcription from RNA polymerase II promoter	58	2.57663	0.095038	MEF2C, PPARA, ELF4, HOXD13, TP63, NFKB1, RORA, FOXO3, CBFB, MEN1, PAX9, GATA6, SUPT5H, MYC, FGF2, AR, MYO6, RXRB, SOX11, TP53, ARNTL, SIX4, MED13, ESR2, AHR, HES1, MURC, EP300, MTF1, TFAP2B, CAMTA2, CNBP, HOXA13, SRF, HAND1, HAND2, BCL11B, NFAT5, NR1H4, IKZF2, CEBPB, KLF13, MAML1, CREBBP, SMAD4, IGF1, SMAD1, WWTR1, STAT3, SREBF2, ATXN1, HDAC1, RNF4, ATXN7, NFIC, TBL1X, PBX2, NFIB	1755	371	13528	1.20507	1	0.784717	84.472
GOTERM_BP_FAT	GO:0042493~response to drug	36	1.59929	0.0950494	YWHAZ, HMGCS1, CDH1, SLC47A1, ABCA3, PTEN, HADHA, CCNE1, SLC1A2, PDE4A, SRD5A1, TXNIP, COL18A1, MAT2A, SNX27, MAP1B, TGFBR2, GRIN2A, ACACA, PAPD7, TP53, ITGA2, ATP1A1, SMAD1, ADIPOQ, UBE2B, PARK7, STAT3, SREBF2, SOD2, CCND1, BLMH, EP300, PEBP1, GRK1, SLC9A1	1755	216	13528	1.28471	1	0.783531	84.4757
GOTERM_BP_FAT	GO:0006493~protein amino acid O-linked glycosylation	7	0.310973	0.0953773	GCNT4, GALNT2, POMGNT1, LDLR, GALNT7, DPM2, OGT	1755	25	13528	2.15831	1	0.783506	84.5802
GOTERM_BP_FAT	GO:0045669~positive regulation of osteoblast differentiation	7	0.310973	0.0953773	MEN1, WNT7B, IL6ST, CD276, BMPR2, SMAD1, BMPR1A	1755	25	13528	2.15831	1	0.783506	84.5802
GOTERM_BP_FAT	GO:0021915~neural tube development	14	0.621946	0.095564	BCL10, FKBP8, VANGL2, PTK7, GAS1, CELSR1, FZD6, DVL1, HES1, PFN1, TSC1, ZIC5, IFT172, HECTD1	1755	68	13528	1.587	1	0.782967	84.6395
GOTERM_BP_FAT	GO:0034660~ncRNA metabolic process	38	1.68814	0.0955726	HSD17B10, ELAC2, QTRT1, IARS2, VARS, ADAT1, WARS, WDR55, RPS28, INTS7, LARS, RPP30, RPL11, KIAA0391, FTSJ1, FTSJ3, DEDD2, MTO1, MARS, RPS24, CARS, TSEN54, EXOSC6, EXOSC2, HEATR1, RRP9, TRMT61A, SARS2, EARS2, DDX56, PA2G4, RPS16, RPS14, RARS, RPS15, POP4, TRUB2, AARS2	1755	230	13528	1.27354	1	0.78178	84.6422
GOTERM_BP_FAT	GO:0000904~cell morphogenesis involved in differentiation	40	1.77699	0.095872	PLXNA3, CDK5R1, UCHL1, PIP5K1C, CABP4, EPHB2, IGF1R, MACF1, UNC5B, BCL11B, PAFAH1B1, DCX, RUNX3, HNRNPAB, PRKCA, ACTB, COL18A1, PARD6B, KLF7, NRXN3, EFNB1, MAP1B, TRIM28, DPYSL5, DOCK7, RPL24, GAS1, MYH9, DVL1, HES1, NCAM2, EPHA4, EPHA7, OPHN1, EFNA5, CHRNB2, LAMC1, UBB, CACNA1A, GRK1	1755	244	13528	1.26365	1	0.781659	84.7368
GOTERM_BP_FAT	GO:0010564~regulation of cell cycle process	21	0.932919	0.0966161	XPO1, HOXA13, NEK2, SMAD6, IGF1, ESPL1, GAS1, CALR, RCC1, PKIA, ATM, PIN1, CDT1, CDC42, TIMELESS, NPM1, BUB1, PEBP1, HECTD3, TGFA, NEK6	1755	114	13528	1.41994	1	0.78315	84.9694
GOTERM_BP_FAT	GO:0045667~regulation of osteoblast differentiation	10	0.444247	0.0968077	MEN1, TWSG1, WNT7B, IL6ST, CD276, BMPR2, SKI, SMAD1, TOB1, BMPR1A	1755	43	13528	1.79262	1	0.782638	85.0287
GOTERM_BP_FAT	GO:0001838~embryonic epithelial tube formation	10	0.444247	0.0968077	PFN1, BCL10, TSC1, VANGL2, ZIC5, IFT172, PTK7, CELSR1, FZD6, HECTD1	1755	43	13528	1.79262	1	0.782638	85.0287
GOTERM_BP_FAT	GO:0030865~cortical cytoskeleton organization	5	0.222124	0.0970821	EPB41L3, TLN1, CALR, EHD2, LLGL1	1755	14	13528	2.75295	1	0.782426	85.1133
GOTERM_BP_FAT	GO:0002440~production of molecular mediator of immune response	8	0.355398	0.0976732	POLL, TRAF3IP2, GALNT2, MSH3, LAX1, FAS, FOXP1, CTNNBL1	1755	31	13528	1.98923	1	0.783351	85.294
GOTERM_BP_FAT	GO:0006275~regulation of DNA replication	13	0.577521	0.0990411	CDC6, PPP2R1A, IGF1R, GTPBP4, CCDC88A, NF2, WRNIP1, PPP2CA, TP53, IGF1, CALR, TERF2, CDT1	1755	62	13528	1.61625	1	0.787006	85.7043
GOTERM_BP_FAT	GO:0033043~regulation of organelle organization	36	1.59929	0.0998241	TRIOBP, XPO1, HOXA13, ACTR3B, NEK2, RCC1, CAPZB, PIN1, MEN1, CDC42, MACF1, ARPC2, NPM1, BUB1, HECTD3, TGFA, CLASP1, MYC, TERF2, RASA1, ARHGEF2, CCDC88A, STMN3, NF2, MAP1B, IGF1, ESPL1, ATM, TSC1, PEBP1, MAP4, DNMT1, TMSB4X, MAPRE1, NEK6, ADD1	1755	217	13528	1.27879	1	0.78856	85.9343

## Sheet: 2. DAVID(downregulated miRNAs)
Category	Term	Count	%	PValue	Genes	List Total	Pop Hits	Pop Total	Fold Enrichment	Bonferroni	Benjamini	FDR
GOTERM_BP_FAT	GO:0045449~regulation of transcription	301	18.9189	1.42181e-08	SLC2A4RG, HMGN2, GDF7, BBX, ZNF781, CITED4, ZFP91, BRPF1, S1PR1, MED28, MED29, CREB3L2, TIGD2, ZNF394, TIGD5, TIGD6, ZNF101, TADA2A, RREB1, NODAL, ZNF48, ZNF790, PIM1, MECP2, ZNF791, ZNF503, MED10, ZNF500, ZNF37A, MAPK1, CCR6, PTRF, HNF4A, MED16, RPS14, ZNF786, MED18, ZNF785, ZNF384, MNT, TGFBRAP1, TGIF2, PRDM1, TMX1, HOXA11, ZNF514, CALR, TAL1, PFN1, SSX2B, TCF20, ZNF224, ZNF799, ZNF74, TCF23, H…	1174	2601	13528	1.3335	4.79849e-05	4.79849e-05	2.59379e-05
GOTERM_BP_FAT	GO:0051252~regulation of RNA metabolic process	210	13.1992	4.38854e-06	SLC2A4RG, HMGN2, S1PR1, CREB3L2, ZNF394, ZNF101, RREB1, NODAL, ZNF790, MECP2, ZNF791, MED10, ZNF37A, ZNF500, HNF4A, MED16, ZNF786, RPS14, SERBP1, ZNF785, MED18, MNT, TGIF2, PRDM1, TMX1, HOXA11, CALR, ZNF514, PFN1, TAL1, TCF20, SSX2B, ZNF224, ZNF799, ZNF74, HNRNPAB, DVL3, IKZF3, ZNF529, IKZF2, ARGFX, KLF9, ZNF621, KLF16, SKI, EN2, ZNF585B, CSRNP3, ZNF117, KCNH1, EVX1, ELF4, TSG101, ZNFX1, ZNF347, …	1174	1813	13528	1.33471	0.0147022	0.00737832	0.00800567
GOTERM_BP_FAT	GO:0006355~regulation of transcription, DNA-dependent	206	12.9478	4.67664e-06	SLC2A4RG, HMGN2, S1PR1, CREB3L2, ZNF394, ZNF101, RREB1, NODAL, MECP2, ZNF790, ZNF791, MED10, ZNF37A, ZNF500, HNF4A, MED16, ZNF786, RPS14, ZNF785, MED18, MNT, TGIF2, PRDM1, TMX1, HOXA11, CALR, ZNF514, PFN1, TAL1, TCF20, SSX2B, ZNF224, ZNF799, ZNF74, HNRNPAB, DVL3, IKZF3, ZNF529, IKZF2, ARGFX, KLF9, ZNF621, KLF16, SKI, EN2, ZNF585B, CSRNP3, ZNF117, KCNH1, EVX1, ELF4, TSG101, ZNFX1, ZNF347, ZNF677, …	1174	1773	13528	1.33883	0.0156598	0.00524742	0.0085312
GOTERM_BP_FAT	GO:0006350~transcription	233	14.6449	2.62353e-05	SLC2A4RG, BBX, ZNF781, CITED4, PRIM1, ZFP91, BRPF1, MED28, MED29, CREB3L2, ZNF394, ZNF101, TADA2A, RREB1, ZNF48, ZNF790, MECP2, ZNF791, ZNF503, MED10, ZNF500, ZNF37A, CCR6, HNF4A, PTRF, MED16, ZNF786, ZNF785, MED18, MNT, ZNF384, TGIF2, PRDM1, HOXA11, ZNF514, TAL1, SSX2B, TCF20, ZNF224, ZNF799, ZNF74, ZBTB49, ASXL3, IKZF3, ZNF529, IKZF2, ARGFX, KLF9, ZNF621, KLF16, ZNF585B, ZNF526, CSRNP3, SUPT16H…	1174	2101	13528	1.2779	0.0847382	0.0218931	0.0478499
GOTERM_BP_FAT	GO:0045184~establishment of protein localization	98	6.15965	9.27331e-05	GRPEL2, RAB9A, SEC31A, AP4E1, LTBP2, XPO5, XPO4, VPS52, ATG7, RAB25, SAR1A, ATG9A, SIX3, OPTN, TIMM8A, MAPK1, CD36, CD40LG, RAB19, BACE2, F2, AKAP6, RAB15, ERC1, RAB10, ARL6IP1, RTP4, STX7, MTX3, CHCHD4, CALR, BLOC1S3, CUBN, MYO1C, ICMT, SNAPIN, NUP62, PLEKHA8, TOMM70A, SYTL4, YIPF5, COPA, SEC24A, TSG101, AP3S2, VPS37D, RAB3IP, AP1S1, LONP2, SEH1L, AP3B2, RHOB, KDELR1, SYNRG, RAB4A, TP53, STXBP2,…	1174	769	13528	1.46847	0.268742	0.0606787	0.169037
GOTERM_BP_FAT	GO:0015031~protein transport	97	6.09679	0.000105134	GRPEL2, RAB9A, SEC31A, AP4E1, LTBP2, XPO5, XPO4, VPS52, ATG7, RAB25, SAR1A, ATG9A, SIX3, OPTN, TIMM8A, MAPK1, CD36, CD40LG, RAB19, BACE2, F2, AKAP6, RAB15, ERC1, RAB10, ARL6IP1, RTP4, STX7, MTX3, CHCHD4, CALR, BLOC1S3, CUBN, MYO1C, ICMT, SNAPIN, NUP62, PLEKHA8, TOMM70A, SYTL4, YIPF5, COPA, SEC24A, TSG101, AP3S2, VPS37D, RAB3IP, AP1S1, LONP2, SEH1L, AP3B2, RHOB, KDELR1, SYNRG, RAB4A, TP53, STXBP2,…	1174	762	13528	1.46684	0.298718	0.057426	0.191621
GOTERM_BP_FAT	GO:0008104~protein localization	109	6.85104	0.00012154	GRPEL2, RAB9A, SEC31A, LTBP2, AP4E1, XPO5, XPO4, VPS52, ATG7, RAB25, SAR1A, ATG9A, SIX3, OPTN, TIMM8A, MAPK1, CD36, RAB19, CD40LG, BACE2, F2, AKAP6, RAB15, ERC1, RAB10, ARL6IP1, PALM, CAV1, RTP4, STX7, MTX3, CHCHD4, CALR, BLOC1S3, CUBN, MYO1C, ICMT, SNAPIN, NUP62, PLEKHA8, TOMM70A, SYTL4, YIPF5, COPA, SEC24A, TSG101, AP3S2, NBEA, VPS37D, RAB3IP, AP1S1, LONP2, SEH1L, AP3B2, RHOB, KDELR1, ALS2CL, D…	1174	882	13528	1.42404	0.336497	0.0569191	0.221492
GOTERM_BP_FAT	GO:0007242~intracellular signaling cascade	141	8.86235	0.0009156	F2RL3, ADCY2, RAB9A, PLEKHM3, ZAK, STK38, TNFSF15, TNFSF14, AURKA, AGTR2, S1PR1, DIRAS2, RAB25, H2AFX, TLK2, GNG4, RAPGEF1, DDAH1, SAR1A, PAG1, STMN3, RREB1, SOCS1, ARID1A, SOCS5, FOXN3, MARK2, MAPK1, SSTR2, PLCE1, CD36, RAB19, MED16, SSTR1, ZWINT, HTR7, F2, COL1A2, RAB15, RAB10, ERC1, UNC13A, PLCXD3, CAV1, ADORA2B, ERBB2, TIPIN, MAP4K2, CALR, ASB16, RRAGC, VDR, DUSP19, FBXO6, ADRA2B, DYRK2, EGF,…	1174	1256	13528	1.29358	0.954569	0.320533	1.6572
GOTERM_BP_FAT	GO:0051726~regulation of cell cycle	46	2.89126	0.00163237	ZAK, FAM175A, CCNT1, KNTC1, TIPIN, RPS15A, ZNF655, CALR, LATS2, ADCYAP1, PIN1, MEN1, FBXO6, HINFP, RHOB, H2AFX, BCL6, EGF, FOSL1, RUNX3, BUB3, CDK13, CD28, DDB1, PIM1, TP53, IGF1, CDK6, PIM3, BIRC5, CDKN3, CDK4, PKIA, CDK2, FOXN3, PTPN11, CCND1, CDKN1B, HNF4A, CCND2, EPGN, ZWINT, BTG3, MNT, PEBP1, MDM2	1174	331	13528	1.60138	0.995969	0.458081	2.93638
GOTERM_BP_FAT	GO:0006916~anti-apoptosis	32	2.01131	0.00172317	TMX1, HMGB1, YWHAZ, XIAP, BCL2L2, CIAPIN1, BAG4, IGF1R, SH3GLB1, SQSTM1, HMOX1, TGM2, GLO1, TRAF6, ARHGDIA, DHCR24, SGK3, RELA, IGF1, BIRC5, ESR2, TAX1BP1, SOD2, BFAR, SERPINB9, PRLR, SFRP1, CD40LG, TNFAIP3, TIAF1, MYO18A, FAIM2	1174	206	13528	1.78998	0.997034	0.44126	3.09729
GOTERM_BP_FAT	GO:0010741~negative regulation of protein kinase cascade	10	0.628536	0.00294868	MEN1, CAV1, HNF4A, SOCS1, NLRP12, OTUD7B, PEBP1, TNFAIP3, PHLDA3, RHOH	1174	36	13528	3.20083	0.999953	0.595881	5.24466
GOTERM_BP_FAT	GO:0045787~positive regulation of cell cycle	13	0.817096	0.00308552	CCND1, CCND2, EPGN, PIM1, PEBP1, MDM2, RPS15A, IGF1, BIRC5, CALR, EGF, FOSL1, CD28	1174	57	13528	2.62805	0.99997	0.580689	5.48161
GOTERM_BP_FAT	GO:0006357~regulation of transcription from RNA polymerase II promoter	85	5.34255	0.0037153	FOSL2, EVX1, FOXK1, ELF4, RHOQ, PAX1, MEN1, GABPB1, HOXC8, S1PR1, MYOCD, GATA6, HMOX1, SMARCD1, RHOA, SPIB, FOSL1, NFX1, ZNF281, ELP2, AR, LBX1, NODAL, RELA, SIX3, MECP2, TP53, ZNF8, ESR2, ECSIT, PKIA, AHR, MED10, JMY, MYCN, CIAO1, MED7, ASCL1, MED4, HNF4A, MED16, TIAL1, RPS14, MED18, SIX1, MDM2, PRDM1, LCOR, SRCAP, HMGB1, CNBP, ONECUT3, ELK1, FHL2, CALR, PFN1, TAL1, VDR, TCEA3, SQSTM1, HAND2, PO…	1174	727	13528	1.34726	0.999996	0.619529	6.56499
GOTERM_BP_FAT	GO:0051325~interphase	19	1.19422	0.00423039	PIM1, CDK6, BIRC5, ZNF655, CDK4, CDKN3, FOXN3, LATS2, CDK2, CUL3, CCND1, CDKN1B, GSPT1, CCND2, HINFP, MDM2, KPNA2, CAMK2A, DNM2	1174	106	13528	2.06544	0.999999	0.640122	7.44233
GOTERM_BP_FAT	GO:0006468~protein amino acid phosphorylation	78	4.90258	0.00549484	PRPF4B, STK38, ZAK, GDF7, CCNT1, DSTYK, AURKA, PRKG2, LATS2, PRKX, CSNK2A1, COL4A3BP, ILK, CLK4, MASTL, TLK2, GOLGA5, SIK2, CDK13, TYRO3, SGK3, MYO3A, MYLK3, PIM1, MINK1, PIM3, CDK6, CDK4, WEE1, CDK2, PRKCB, MARK2, MAPK1, PLCE1, CCND1, ACVR2B, KSR2, CDKL1, CAMK4, MAPK4, F2, NEK8, TXK, NEK4, ERC1, FRK, ADORA2B, ERBB2, MAP4K2, ADRBK2, ABI2, TRIB3, IGF1R, MAP3K3, MAP3K2, LMTK2, DYRK2, ADRA2B, EGF, Y…	1174	667	13528	1.34752	1	0.710543	9.56314
GOTERM_BP_FAT	GO:0051329~interphase of mitotic cell cycle	18	1.13136	0.00714936	PIM1, CDK6, BIRC5, CDK4, CDKN3, FOXN3, LATS2, CDK2, CUL3, CCND1, CDKN1B, GSPT1, CCND2, HINFP, MDM2, KPNA2, CAMK2A, DNM2	1174	103	13528	2.01373	1	0.779858	12.2689
GOTERM_BP_FAT	GO:0051130~positive regulation of cellular component organization	27	1.69705	0.00721973	CAV1, C3, RHOQ, CBLL1, CALR, MEN1, ZFP91, SUMO1, ROBO1, ILK, RHOA, NEDD4L, CDC42EP4, EGF, ARHGDIA, TERF2, CD28, PTPRF, PLEK, IGF1, RICTOR, AHR, NUMBL, UBE2N, CDKN1B, EPGN, PEBP1	1174	181	13528	1.7189	1	0.762723	12.3822
GOTERM_BP_FAT	GO:0045017~glycerolipid biosynthetic process	15	0.942803	0.00837563	MOGAT1, IMPA1, TAZ, PIGS, PNPLA3, PIGO, PLCE1, PIGG, SH3GLB1, ANG, FABP3, ETNK1, PCYT1A, PTDSS1, PLA2G5	1174	80	13528	2.16056	1	0.793415	14.2247
GOTERM_BP_FAT	GO:0010627~regulation of protein kinase cascade	34	2.13702	0.00929494	MAVS, CAV1, TMEM189-UBE2V1, ZAK, ERBB2, TSPAN6, UBE2V1, MEN1, ZFP91, GRIN2B, REL, MAP3K3, MAP3K2, SQSTM1, HMOX1, ILK, RHOA, OTUD7B, TGM2, RHOC, TRAF6, PHLDA3, RHOH, RELA, SOCS1, IGF1, IL6R, RICTOR, TMEM189, UBE2N, NUP62, HNF4A, NLRP12, PEBP1, MAPK8IP3, TNFAIP3	1174	249	13528	1.57342	1	0.809632	15.6638
GOTERM_BP_FAT	GO:0006886~intracellular protein transport	47	2.95412	0.00974918	ARL6IP1, COPA, GRPEL2, YWHAZ, STX7, SEC24A, RTP4, LTBP2, AP4E1, XPO5, MTX3, TIMM10, AP3S2, CALR, AP1S1, LONP2, AP3B2, AP3D1, BCL6, SAR1A, KDELR1, SYNRG, YWHAB, SIX3, TP53, SNAPIN, ICMT, OPTN, YWHAE, TIMM8A, MAPK1, YWHAH, RPL23, COG7, TOMM70A, NUP205, F2, SYTL4, KPNA6, AKAP6, KPNA5, KPNA4, KPNA2, GGA2, SSR2, KPNA1, SEC23B	1174	374	13528	1.44808	1	0.808572	16.3665
GOTERM_BP_FAT	GO:0043122~regulation of I-kappaB kinase/NF-kappaB cascade	18	1.13136	0.0104183	MAVS, TMEM189-UBE2V1, RELA, TSPAN6, UBE2V1, TMEM189, UBE2N, REL, MAP3K3, NUP62, SQSTM1, HMOX1, NLRP12, TGM2, OTUD7B, RHOA, RHOC, TNFAIP3, TRAF6, RHOH	1174	107	13528	1.93845	1	0.814213	17.3915
GOTERM_BP_FAT	GO:0010035~response to inorganic substance	29	1.82275	0.0106984	CAV1, IMPA1, SEC31A, STAR, DUOX2, ROMO1, KCNMB1, FGB, HMOX1, DDX19B, SLC30A4, SLC30A5, NDRG1, NEDD4L, FOSL1, FANCC, TXNIP, ACTB, SLC8A1, RELA, SOD2, CCND1, NPTXR, TFRC, PLCG2, PEBP1, ABAT, PPP1R15B, CALM2	1174	205	13528	1.63008	1	0.807964	17.8169
GOTERM_BP_FAT	GO:0046907~intracellular transport	75	4.71402	0.0110848	ARSB, COPA, GRPEL2, SEC31A, SEC24A, LTBP2, AP4E1, XPO5, AP3S2, RAB3IP, AP1S1, LONP2, AP3B2, RHOB, GOLGA5, KDELR1, SAR1A, SYNRG, HSP90AA1, SIX3, TP53, OPTN, ERGIC1, M6PR, TIMM8A, KIF1C, ANKRD27, MAPK1, CAMK4, NUP205, F2, TBRG1, ZNF384, KPNA6, AKAP6, KPNA5, GNAS, THOC5, KPNA4, ERC1, KPNA2, SEC23B, KPNA1, ARL6IP1, TMX1, YWHAZ, RTP4, STX7, MTX3, TIMM10, CALR, BLOC1S3, SQSTM1, DDX19B, AP3D1, BCL6, MLX…	1174	657	13528	1.31541	1	0.805175	18.4006
GOTERM_BP_FAT	GO:0006605~protein targeting	30	1.88561	0.0112292	ARL6IP1, GRPEL2, YWHAZ, RTP4, LTBP2, XPO5, MTX3, TIMM10, CALR, LONP2, BCL6, YWHAB, SIX3, TP53, ICMT, OPTN, YWHAE, TIMM8A, MAPK1, RPL23, TOMM70A, NUP205, F2, KPNA6, AKAP6, KPNA5, KPNA4, KPNA2, KPNA1, SSR2	1174	215	13528	1.60786	1	0.795673	18.6176
GOTERM_BP_FAT	GO:0043069~negative regulation of programmed cell death	45	2.82841	0.0119823	HMGB1, TMX1, YWHAZ, XIAP, ERBB2, BCL2L2, BDKRB2, GCLM, CIAPIN1, ZFP91, IGF1R, BAG4, G2E3, SQSTM1, SH3GLB1, HMOX1, ILK, TGM2, RHOA, GLO1, BCL6, TRAF6, ARHGDIA, DHCR24, SGK3, RELA, PIM1, TP53, IGF1, BIRC5, PIM3, ESR2, TAX1BP1, SOD2, BFAR, SERPINB9, PRLR, NUP62, SFRP1, CD40LG, PLCG2, TNFAIP3, TIAF1, MYO18A, FAIM2	1174	359	13528	1.44439	1	0.803557	19.7411
GOTERM_BP_FAT	GO:0060548~negative regulation of cell death	45	2.82841	0.0125384	HMGB1, TMX1, YWHAZ, XIAP, ERBB2, BCL2L2, BDKRB2, GCLM, CIAPIN1, ZFP91, IGF1R, BAG4, G2E3, SQSTM1, SH3GLB1, HMOX1, ILK, TGM2, RHOA, GLO1, BCL6, TRAF6, ARHGDIA, DHCR24, SGK3, RELA, PIM1, TP53, IGF1, BIRC5, PIM3, ESR2, TAX1BP1, SOD2, BFAR, SERPINB9, PRLR, NUP62, SFRP1, CD40LG, PLCG2, TNFAIP3, TIAF1, MYO18A, FAIM2	1174	360	13528	1.44037	1	0.805606	20.5611
GOTERM_BP_FAT	GO:0034613~cellular protein localization	50	3.14268	0.013656	COPA, GRPEL2, SEC24A, AP4E1, LTBP2, XPO5, AP3S2, RAB3IP, AP1S1, LONP2, AP3B2, SAR1A, KDELR1, SYNRG, SIX3, TP53, OPTN, TIMM8A, MAPK1, NUP205, F2, AKAP6, KPNA6, KPNA5, KPNA4, KPNA2, KPNA1, SEC23B, ARL6IP1, YWHAZ, STX7, RTP4, MTX3, TIMM10, CALR, SH3GLB1, AP3D1, BCL6, TERF2, YWHAB, ICMT, SNAPIN, YWHAE, YWHAH, COG7, RPL23, TOMM70A, SYTL4, GGA2, SSR2	1174	411	13528	1.40182	1	0.820713	22.1855
GOTERM_BP_FAT	GO:0042127~regulation of cell proliferation	87	5.46826	0.0146072	DLC1, FOSL2, OSMR, TSG101, PRRX1, TNFSF15, NAP1L1, ROMO1, IL15, CUL3, MEN1, ZFP91, S1PR1, MYOCD, PTGES, ANG, HMOX1, ILK, FANCA, FOSL1, DHCR24, CDK13, LBX1, CTBP2, PTPRF, CD3E, NODAL, RELA, TP53, CDK6, ESR2, IL6R, CDK4, CDK2, MYCN, CIAO1, MAPK1, SSTR2, CCND1, ADM, HNF4A, CCND2, SSTR1, BTG3, TBRG1, MNT, MDM2, LAMC1, TBX18, FRK, CNBP, CAV1, CSF1, ERBB2, TIPIN, RPS15A, BDKRB2, CALR, CDH5, PIN1, VCAM1…	1174	787	13528	1.27383	1	0.830291	23.5431
GOTERM_BP_FAT	GO:0043066~negative regulation of apoptosis	44	2.76556	0.0148496	HMGB1, TMX1, YWHAZ, XIAP, ERBB2, BCL2L2, BDKRB2, GCLM, CIAPIN1, ZFP91, IGF1R, BAG4, G2E3, SQSTM1, SH3GLB1, HMOX1, ILK, TGM2, RHOA, GLO1, BCL6, TRAF6, ARHGDIA, DHCR24, SGK3, RELA, PIM1, TP53, IGF1, BIRC5, PIM3, ESR2, TAX1BP1, SOD2, BFAR, SERPINB9, PRLR, NUP62, SFRP1, CD40LG, TNFAIP3, TIAF1, MYO18A, FAIM2	1174	354	13528	1.43224	1	0.82468	23.8855
GOTERM_BP_FAT	GO:0070727~cellular macromolecule localization	50	3.14268	0.0154715	COPA, GRPEL2, SEC24A, AP4E1, LTBP2, XPO5, AP3S2, RAB3IP, AP1S1, LONP2, AP3B2, SAR1A, KDELR1, SYNRG, SIX3, TP53, OPTN, TIMM8A, MAPK1, NUP205, F2, AKAP6, KPNA6, KPNA5, KPNA4, KPNA2, KPNA1, SEC23B, ARL6IP1, YWHAZ, STX7, RTP4, MTX3, TIMM10, CALR, SH3GLB1, AP3D1, BCL6, TERF2, YWHAB, ICMT, SNAPIN, YWHAE, YWHAH, COG7, RPL23, TOMM70A, SYTL4, GGA2, SSR2	1174	414	13528	1.39167	1	0.826945	24.7573
GOTERM_BP_FAT	GO:0009968~negative regulation of signal transduction	30	1.88561	0.0160021	DLC1, CAV1, CALR, PIN1, MEN1, AGTR2, PEG10, RGS11, OTUD7B, BCL6, SOX17, PHLDA3, RHOH, STMN3, PTPRF, PLEK, CD3E, RELA, SOCS1, SIX3, SKI, SOCS5, RGS9BP, CCND1, NUP62, HNF4A, RGS5, NLRP12, PEBP1, TNFAIP3	1174	221	13528	1.56421	1	0.82731	25.4936
GOTERM_BP_FAT	GO:0051169~nuclear transport	23	1.44563	0.0178642	XPOT, XPO5, SIX3, TP53, SMG1, CALR, MAPK1, CAMK4, RPL23, RSRC1, DDX19B, NUP205, F2, TBRG1, ZNF384, KPNA6, MLXIP, BCL6, KPNA5, KPNA4, THOC5, KPNA2, KPNA1	1174	158	13528	1.6774	1	0.850603	28.0242
GOTERM_BP_FAT	GO:0032446~protein modification by small protein conjugation	20	1.25707	0.0192718	RNF144B, ATG10, TMEM189-UBE2V1, UBE4A, TSG101, DDB1, UBE2V1, CDC73, MYLIP, CBLL1, TMEM189, RBX1, UBE2N, ERCC8, SUMO2, SUMO1, G2E3, GSPT1, MDM2, NEDD4L, AMFR, TRAF6	1174	132	13528	1.74591	1	0.863335	29.8831
GOTERM_BP_FAT	GO:0042770~DNA damage response, signal transduction	14	0.87995	0.0195688	CCND1, UACA, ZAK, FAM175A, HMOX1, HINFP, FBXO6, TIPIN, TP53, H2AFX, DYRK2, PHLDA3, FOXN3, PTPN11	1174	80	13528	2.01652	1	0.859388	30.2694
GOTERM_BP_FAT	GO:0008285~negative regulation of cell proliferation	44	2.76556	0.0201884	DLC1, FRK, CAV1, TSG101, ERBB2, TNFSF15, IL15, BDKRB2, CDH5, MEN1, VDR, PTGES, ANG, HMOX1, ILK, BCL6, FOSL1, QSOX1, RUNX3, DHCR24, PINX1, IL2RA, LBX1, CTBP2, PTPRF, TP53, CDK6, SKI, TRIM24, ESR2, CDKN3, SOD2, BTLA, SSTR2, CDKN1B, NUP62, HNF4A, ADM, SSTR1, TBRG1, CD274, BTG3, MNT, FABP3	1174	361	13528	1.40447	1	0.860076	31.0689
GOTERM_BP_FAT	GO:0070647~protein modification by small protein conjugation or removal	23	1.44563	0.0203927	ATG10, TMEM189-UBE2V1, TSG101, UBE2V1, CDC73, CBLL1, MYLIP, RBX1, SUMO2, ERCC8, G2E3, SUMO1, OTUD7B, NEDD4L, TRAF6, RNF144B, UBE4A, DDB1, USP1, TMEM189, UBE2N, GSPT1, USP46, MDM2, AMFR	1174	160	13528	1.65643	1	0.855081	31.3307
GOTERM_BP_FAT	GO:0045936~negative regulation of phosphate metabolic process	10	0.628536	0.0206057	MEN1, CAV1, CDKN1B, HNF4A, SOCS1, YWHAB, NLRP12, PEBP1, BDKRB2, YWHAE	1174	48	13528	2.40062	1	0.850313	31.6026
GOTERM_BP_FAT	GO:0010563~negative regulation of phosphorus metabolic process	10	0.628536	0.0206057	MEN1, CAV1, CDKN1B, HNF4A, SOCS1, YWHAB, NLRP12, PEBP1, BDKRB2, YWHAE	1174	48	13528	2.40062	1	0.850313	31.6026
GOTERM_BP_FAT	GO:0000077~DNA damage checkpoint	10	0.628536	0.0206057	CCND1, ZAK, FAM175A, FBXO6, TIPIN, HINFP, TP53, H2AFX, FOXN3, PTPN11	1174	48	13528	2.40062	1	0.850313	31.6026
GOTERM_BP_FAT	GO:0000082~G1/S transition of mitotic cell cycle	11	0.691389	0.0208861	CUL3, CCND1, CDKN1B, GSPT1, CCND2, PIM1, HINFP, CDKN3, CDK4, CAMK2A, LATS2	1174	56	13528	2.26345	1	0.846594	31.959
GOTERM_BP_FAT	GO:0007569~cell aging	8	0.502828	0.0208964	LIMS1, NUP62, ILK, MNT, TP53, ROMO1, TERF2, PRELP	1174	33	13528	2.79345	1	0.839186	31.972
GOTERM_BP_FAT	GO:0006607~NLS-bearing substrate import into nucleus	5	0.314268	0.0212864	KPNA6, KPNA5, KPNA4, KPNA2, KPNA1	1174	13	13528	4.43192	1	0.837232	32.4646
GOTERM_BP_FAT	GO:0032984~macromolecular complex disassembly	7	0.439975	0.0213551	MAZ, PTRF, SUPT16H, MTRF1L, MRRF, ETF1, HMGA1	1174	26	13528	3.10235	1	0.830843	32.551
GOTERM_BP_FAT	GO:0034623~cellular macromolecular complex disassembly	7	0.439975	0.0213551	MAZ, PTRF, SUPT16H, MTRF1L, MRRF, ETF1, HMGA1	1174	26	13528	3.10235	1	0.830843	32.551
GOTERM_BP_FAT	GO:0008284~positive regulation of cell proliferation	49	3.07982	0.0230212	FOSL2, OSMR, PRRX1, NAP1L1, ROMO1, IL15, CUL3, ZFP91, S1PR1, MYOCD, ANG, ILK, FOSL1, CDK13, CD3E, NODAL, RELA, CDK6, IL6R, CDK4, CDK2, MYCN, CIAO1, MAPK1, CCND1, ADM, CCND2, MDM2, LAMC1, TBX18, CNBP, CSF1, ERBB2, TIPIN, RPS15A, CALR, VCAM1, IGF1R, TGM2, BCL6, EGF, CD28, IL2RA, TNFRSF13C, IGF1, RPS9, ICMT, CDKN1B, EPGN	1174	414	13528	1.36383	1	0.846114	34.6154
GOTERM_BP_FAT	GO:0032774~RNA biosynthetic process	37	2.32558	0.0238313	POU6F2, CCNT1, TCOF1, IVNS1ABP, POLR2D, PAX1, PRIM1, MAZ, ASH2L, TCEA3, ANG, FOSL1, RUNX3, GTF3C4, NFX1, MAFF, AR, TRIP4, TADA2A, RREB1, CREB1, TP53, GTF2H3, POLR3A, TRIM24, AHR, POLR3D, MED7, MED4, PTRF, MED16, GTF2F1, MNT, SUPT16H, NFE2L1, NFIC, LCOR	1174	296	13528	1.44037	1	0.8494	35.5973
GOTERM_BP_FAT	GO:0000075~cell cycle checkpoint	15	0.942803	0.0245151	ZAK, FAM175A, DDB1, TP53, TIPIN, KNTC1, BIRC5, FOXN3, PTPN11, CCND1, ZWINT, FBXO6, HINFP, H2AFX, BUB3	1174	91	13528	1.8994	1	0.851006	36.4154
GOTERM_BP_FAT	GO:0032570~response to progesterone stimulus	6	0.377121	0.0250566	TXNIP, CAV1, RELA, ERBB2, SOCS1, FOSL1	1174	20	13528	3.4569	1	0.850907	37.0563
GOTERM_BP_FAT	GO:0032728~positive regulation of interferon-beta production	4	0.251414	0.0261276	MAVS, POLR3F, POLR3A, POLR3D	1174	8	13528	5.7615	1	0.856649	38.3058
GOTERM_BP_FAT	GO:0033365~protein localization in organelle	21	1.31992	0.0270857	GRPEL2, YWHAZ, MTX3, SIX3, TP53, TIMM10, OPTN, RAB3IP, TIMM8A, MAPK1, COG7, RPL23, TOMM70A, NUP205, F2, KPNA6, BCL6, KPNA5, KPNA4, KPNA2, KPNA1	1174	146	13528	1.65742	1	0.860796	39.4038
GOTERM_BP_FAT	GO:0007568~aging	17	1.06851	0.0275206	LIMS1, FADS1, RELA, TP53, ROMO1, IL15, CCL5, CALR, SOD2, PRELP, ADM, TFRC, NUP62, ILK, MNT, PEBP1, TERF2	1174	110	13528	1.78083	1	0.859447	39.896
GOTERM_BP_FAT	GO:0006913~nucleocytoplasmic transport	22	1.38278	0.0284443	XPOT, XPO5, SIX3, TP53, SMG1, CALR, MAPK1, CAMK4, RPL23, RSRC1, DDX19B, NUP205, F2, ZNF384, KPNA6, MLXIP, BCL6, KPNA5, KPNA4, THOC5, KPNA2, KPNA1	1174	156	13528	1.62504	1	0.862973	40.929
GOTERM_BP_FAT	GO:0010038~response to metal ion	19	1.19422	0.0295353	ACTB, TXNIP, CAV1, SEC31A, IMPA1, STAR, KCNMB1, CCND1, TFRC, FGB, DDX19B, PLCG2, SLC30A4, PEBP1, ABAT, SLC30A5, NDRG1, NEDD4L, CALM2	1174	129	13528	1.69719	1	0.86783	42.1274
GOTERM_BP_FAT	GO:0043933~macromolecular complex subunit organization	77	4.83972	0.030318	CAPZA2, IDE, CAPZA1, NAP1L1, SNRPD1, KNTC1, ZFP91, MAZ, SEH1L, ANG, ILK, H2AFX, SLC1A1, MDN1, FANCA, FANCC, HSP90AA1, CD3E, NIP7, TAZ, TP53, GTF2H3, ARID1A, PFKM, HMGA1, MED7, MED4, PTRF, MED16, TBCA, RRM2, RPS14, NUP205, RRM1, MDM2, PEBP1, VAMP3, CELF1, AMFR, LAMC1, ZNHIT6, TRAF1, CAV1, HIST1H2AG, ABI2, POLR2D, CALR, BMS1, SF3B3, SDHAF1, IGF1R, FGB, TGM2, GTF3C4, SCO1, HIST2H3A, HIST1H2BD, TSR1,…	1174	710	13528	1.24968	1	0.869631	42.9731
GOTERM_BP_FAT	GO:0006351~transcription, DNA-dependent	36	2.26273	0.0309258	POU6F2, CCNT1, TCOF1, IVNS1ABP, POLR2D, PAX1, MAZ, ASH2L, TCEA3, ANG, FOSL1, RUNX3, GTF3C4, NFX1, MAFF, AR, TRIP4, TADA2A, RREB1, CREB1, TP53, GTF2H3, POLR3A, TRIM24, AHR, POLR3D, MED7, MED4, PTRF, MED16, GTF2F1, MNT, SUPT16H, NFE2L1, NFIC, LCOR	1174	292	13528	1.42064	1	0.869827	43.6216
GOTERM_BP_FAT	GO:0033554~cellular response to stress	63	3.95977	0.0320681	MICA, ZAK, FAM175A, CLPB, DUOX2, ROMO1, MEN1, HMOX1, COL4A3BP, H2AFX, TLK2, FANCA, FANCC, ATG9A, DDB1, USP1, TP53, GTF2H3, MINK1, GTF2H5, FOXN3, JMY, UBE2N, MAPK1, CCND1, ADM, RFC2, AMFR, PPP1R15B, HMGB1, ATG10, CAV1, XIAP, ADORA2B, SHFM1, MAP4K2, TIPIN, SMUG1, RBX1, ERCC8, SUMO1, DUSP19, MAP3K2, FBXO6, HINFP, RTN4RL2, BCL6, DYRK2, POLQ, PHLDA3, TNRC6A, TERF2, FEN1, FADS1, SMG1, PTPN11, SOD2, POL…	1174	566	13528	1.2826	1	0.87451	44.8217
GOTERM_BP_FAT	GO:0006974~response to DNA damage stimulus	44	2.76556	0.0329784	HMGB1, MICA, ZAK, XIAP, FAM175A, SHFM1, TIPIN, SMUG1, RBX1, MEN1, ERCC8, SUMO1, HMOX1, FBXO6, HINFP, BCL6, H2AFX, DYRK2, TLK2, POLQ, PHLDA3, FANCA, TERF2, FEN1, FANCC, USP1, DDB1, TP53, GTF2H3, SMG1, GTF2H5, FOXN3, SOD2, PTPN11, JMY, UBE2N, POLD3, MAPK1, ATXN3, CCND1, UACA, RFC2, SUPT16H, PARP2	1174	373	13528	1.35928	1	0.877041	45.7607
GOTERM_BP_FAT	GO:0031570~DNA integrity checkpoint	10	0.628536	0.0332026	CCND1, ZAK, FAM175A, FBXO6, TIPIN, HINFP, TP53, H2AFX, FOXN3, PTPN11	1174	52	13528	2.21596	1	0.874069	45.9897
GOTERM_BP_FAT	GO:0051603~proteolysis involved in cellular protein catabolic process	66	4.14833	0.0343993	TMEM189-UBE2V1, TSG101, UBE2G2, IDE, RNF216, MYLIP, KLHL3, ZYG11B, CUL3, G2E3, ZYG11A, ATG7, FBXO27, KLHL21, DDA1, RNF149, YOD1, USP14, NFX1, PAN2, UFD1L, DDB1, RELA, USP1, SOCS1, SOCS5, TMEM189, UBE2N, BACE2, KLHL15, MDM2, AMFR, TNFAIP3, ATG10, XIAP, UBE2V1, UBA6, CBLL1, ASB16, FEM1B, RBX1, PSMB5, SUMO2, ARIH1, SUMO1, UEVLD, SQSTM1, UFM1, PSMB2, FBXO6, OTUD7B, FBXO41, NEDD4L, USP35, FBXO42, TRAF…	1174	600	13528	1.26753	1	0.878722	47.1964
GOTERM_BP_FAT	GO:0007264~small GTPase mediated signal transduction	37	2.32558	0.0353409	RAB9A, RHOQ, SHOC2, RRAGC, RAB42, DIRAS2, HMOX1, RHOA, RAB11B, RHOB, RAB25, RHOC, CDC42EP4, ARL5C, SAR1A, RAPGEF1, ARL5B, ARHGDIA, RHOH, DHCR24, GDI1, VAV3, RREB1, RAB4A, YWHAB, IGF1, ARL3, MAPK1, RAB32, RAB31, PLCE1, MAPK13, RAB19, COL1A2, RAB15, RAB10, NKIRAS2	1174	305	13528	1.39787	1	0.881213	48.1278
GOTERM_BP_FAT	GO:0030163~protein catabolic process	68	4.27404	0.036501	TMEM189-UBE2V1, TSG101, UBE2G2, IDE, RNF216, MYLIP, KLHL3, ZYG11B, CUL3, G2E3, ZYG11A, ATG7, FBXO27, KLHL21, DDA1, RNF149, YOD1, USP14, NFX1, PAN2, UFD1L, DDB1, RELA, USP1, SOCS1, SOCS5, TMEM189, UBE2N, BACE2, KLHL15, MDM2, YME1L1, AMFR, TNFAIP3, ATG10, XIAP, UBE2V1, UBA6, CBLL1, ASB16, FEM1B, RBX1, PSMB5, SUMO2, ARIH1, SUMO1, UEVLD, SQSTM1, UFM1, PSMB2, FBXO6, OTUD7B, PRSS16, FBXO41, NEDD4L, FBX…	1174	622	13528	1.25975	1	0.885102	49.2542
GOTERM_BP_FAT	GO:0001954~positive regulation of cell-matrix adhesion	4	0.251414	0.0367085	CD36, CSF1, ILK, CDK6	1174	9	13528	5.12133	1	0.88227	49.4532
GOTERM_BP_FAT	GO:0043124~negative regulation of I-kappaB kinase/NF-kappaB cascade	4	0.251414	0.0367085	NLRP12, OTUD7B, TNFAIP3, RHOH	1174	9	13528	5.12133	1	0.88227	49.4532
GOTERM_BP_FAT	GO:0046580~negative regulation of Ras protein signal transduction	4	0.251414	0.0367085	DLC1, NUP62, STMN3, BCL6	1174	9	13528	5.12133	1	0.88227	49.4532
GOTERM_BP_FAT	GO:0033003~regulation of mast cell activation	4	0.251414	0.0367085	ADORA2B, HMOX1, STXBP2, CD226	1174	9	13528	5.12133	1	0.88227	49.4532
GOTERM_BP_FAT	GO:0051058~negative regulation of small GTPase mediated signal transduction	4	0.251414	0.0367085	DLC1, NUP62, STMN3, BCL6	1174	9	13528	5.12133	1	0.88227	49.4532
GOTERM_BP_FAT	GO:0006282~regulation of DNA repair	6	0.377121	0.0368665	UBE2N, ERCC8, TMEM189-UBE2V1, FAM175A, USP1, UBE2V1, H2AFX, TMEM189	1174	22	13528	3.14264	1	0.879117	49.6043
GOTERM_BP_FAT	GO:0044257~cellular protein catabolic process	66	4.14833	0.0383528	TMEM189-UBE2V1, TSG101, UBE2G2, IDE, RNF216, MYLIP, KLHL3, ZYG11B, CUL3, G2E3, ZYG11A, ATG7, FBXO27, KLHL21, DDA1, RNF149, YOD1, USP14, NFX1, PAN2, UFD1L, DDB1, RELA, USP1, SOCS1, SOCS5, TMEM189, UBE2N, BACE2, KLHL15, MDM2, AMFR, TNFAIP3, ATG10, XIAP, UBE2V1, UBA6, CBLL1, ASB16, FEM1B, RBX1, PSMB5, SUMO2, ARIH1, SUMO1, UEVLD, SQSTM1, UFM1, PSMB2, FBXO6, OTUD7B, FBXO41, NEDD4L, USP35, FBXO42, TRAF…	1174	603	13528	1.26122	1	0.885105	51.0042
GOTERM_BP_FAT	GO:0010648~negative regulation of cell communication	31	1.94846	0.0389881	DLC1, CAV1, GRIK3, CALR, PIN1, MEN1, AGTR2, PEG10, RGS11, OTUD7B, BCL6, SOX17, PHLDA3, RHOH, STMN3, PTPRF, PLEK, CD3E, RELA, SOCS1, SIX3, SKI, SOCS5, RGS9BP, CCND1, NUP62, HNF4A, RGS5, NLRP12, PEBP1, TNFAIP3	1174	248	13528	1.44037	1	0.885229	51.5914
GOTERM_BP_FAT	GO:0007346~regulation of mitotic cell cycle	21	1.31992	0.0393303	TP53, KNTC1, IGF1, PIM3, BIRC5, ZNF655, PKIA, CDK2, PIN1, CCND1, HNF4A, EPGN, ZWINT, BTG3, PEBP1, MDM2, BCL6, EGF, BUB3, CDK13, CD28	1174	152	13528	1.59199	1	0.883461	51.9049
GOTERM_BP_FAT	GO:0006260~DNA replication	25	1.57134	0.0393816	TMX1, HMGB1, NAP1L1, TIPIN, PRIM1, MCM8, EGF, POLQ, FEN1, TERF2, PINX1, CINP, SPHAR, IGF1, PAPD5, RMI1, HMGA1, CDK2, POLD3, RFC2, RRM2, RRM1, TBRG1, SUPT16H, NFIC	1174	190	13528	1.51618	1	0.87982	51.9517
GOTERM_BP_FAT	GO:0006651~diacylglycerol biosynthetic process	3	0.188561	0.0400412	MOGAT1, PLCE1, ANG	1174	4	13528	8.64225	1	0.880188	52.5501
GOTERM_BP_FAT	GO:0019941~modification-dependent protein catabolic process	63	3.95977	0.0405353	TMEM189-UBE2V1, TSG101, UBE2G2, RNF216, MYLIP, KLHL3, ZYG11B, CUL3, G2E3, ZYG11A, ATG7, FBXO27, KLHL21, DDA1, RNF149, YOD1, USP14, NFX1, PAN2, UFD1L, DDB1, USP1, SOCS1, SOCS5, TMEM189, UBE2N, KLHL15, MDM2, AMFR, TNFAIP3, ATG10, XIAP, UBE2V1, UBA6, CBLL1, FEM1B, ASB16, RBX1, PSMB5, SUMO2, ARIH1, SUMO1, UEVLD, SQSTM1, UFM1, PSMB2, FBXO6, OTUD7B, FBXO41, NEDD4L, USP35, FBXO42, TRAF6, BUB3, SPOP, RNF…	1174	574	13528	1.26472	1	0.879489	52.9937
GOTERM_BP_FAT	GO:0043632~modification-dependent macromolecule catabolic process	63	3.95977	0.0405353	TMEM189-UBE2V1, TSG101, UBE2G2, RNF216, MYLIP, KLHL3, ZYG11B, CUL3, G2E3, ZYG11A, ATG7, FBXO27, KLHL21, DDA1, RNF149, YOD1, USP14, NFX1, PAN2, UFD1L, DDB1, USP1, SOCS1, SOCS5, TMEM189, UBE2N, KLHL15, MDM2, AMFR, TNFAIP3, ATG10, XIAP, UBE2V1, UBA6, CBLL1, FEM1B, ASB16, RBX1, PSMB5, SUMO2, ARIH1, SUMO1, UEVLD, SQSTM1, UFM1, PSMB2, FBXO6, OTUD7B, FBXO41, NEDD4L, USP35, FBXO42, TRAF6, BUB3, SPOP, RNF…	1174	574	13528	1.26472	1	0.879489	52.9937
GOTERM_BP_FAT	GO:0045768~positive regulation of anti-apoptosis	7	0.439975	0.0410248	CAV1, STAR, ADM, HMOX1, IL6R, ERC1, CD28	1174	30	13528	2.6887	1	0.878778	53.4292
GOTERM_BP_FAT	GO:0045767~regulation of anti-apoptosis	8	0.502828	0.0424253	CAV1, STAR, ADM, HMOX1, SERBP1, IL6R, ERC1, CD28	1174	38	13528	2.42589	1	0.883707	54.6544
GOTERM_BP_FAT	GO:0007243~protein kinase cascade	43	2.7027	0.0426662	CAV1, ZAK, ADORA2B, NDST1, STK38, ERBB2, MAP4K2, TNFSF15, TNFSF14, LATS2, MEN1, IGF1R, DUSP19, AGTR2, MAP3K3, MAP3K2, HMOX1, ADRA2B, EGF, TRAF6, SIK2, ZFP36, PLEK, SOCS1, MINK1, STAT3, MARK2, PTPN11, RPS6KA5, MAPK1, PLCE1, RPS6KA4, PRLR, MAPK13, EPGN, F2, NLRP12, MAPK8IP3, TXK, PPM1L, ERC1, TIAF1, NKIRAS2	1174	370	13528	1.33916	1	0.88149	54.8621
GOTERM_BP_FAT	GO:0031346~positive regulation of cell projection organization	9	0.565682	0.0472045	ZFP91, PTPRF, ROBO1, ILK, RHOA, RHOQ, CDC42EP4, ARHGDIA, NUMBL	1174	47	13528	2.20653	1	0.902841	58.6102
GOTERM_BP_FAT	GO:0009306~protein secretion	7	0.439975	0.0472804	NOX5, PLEK, LTBP2, BLOC1S3, CD40LG, BACE2, GNAS	1174	31	13528	2.60197	1	0.899977	58.6703
GOTERM_BP_FAT	GO:0032103~positive regulation of response to external stimulus	11	0.691389	0.0477311	ZFP91, S1PR1, ADORA2B, C3, OSMR, CCR4, F2RL1, NLRP12, TGM2, IL6R, CCL5	1174	64	13528	1.98052	1	0.898992	59.0255
GOTERM_BP_FAT	GO:0002886~regulation of myeloid leukocyte mediated immunity	4	0.251414	0.0491352	ADORA2B, C3, HMOX1, STXBP2	1174	10	13528	4.6092	1	0.902643	60.1138
GOTERM_BP_FAT	GO:0032481~positive regulation of type I interferon production	4	0.251414	0.0491352	MAVS, POLR3F, POLR3A, POLR3D	1174	10	13528	4.6092	1	0.902643	60.1138
GOTERM_BP_FAT	GO:0042255~ribosome assembly	4	0.251414	0.0491352	TSR1, NIP7, RPS14, BMS1	1174	10	13528	4.6092	1	0.902643	60.1138
GOTERM_BP_FAT	GO:0043067~regulation of programmed cell death	85	5.34255	0.0493912	DLC1, ZAK, TNFSF15, TNFSF14, CIAPIN1, CUL3, MEN1, BAG4, ZFP91, G2E3, AGTR2, HMOX1, ILK, RHOA, FOSL1, DHCR24, BCL2L14, SGK3, PTPRF, CD3E, RELA, PIM1, TP53, PIM3, ESR2, IL6R, JMY, MAPK1, SERPINB9, CD40LG, TIAL1, F2, MNT, TNFAIP3, MYO18A, FAIM2, TRAF1, DCC, TMX1, HMGB1, YWHAZ, XIAP, ERBB2, BCL2L2, BDKRB2, CALR, FEM1B, GCLM, VDR, IGF1R, SH3GLB1, SQSTM1, DDX19B, PYCARD, TGM2, BCL6, GLO1, DYRK2, TRAF6,…	1174	812	13528	1.20623	1	0.900756	60.3092
GOTERM_BP_FAT	GO:0051173~positive regulation of nitrogen compound metabolic process	69	4.3369	0.0496659	EVX1, FOXK1, ELF4, GDF7, FAM175A, RHOQ, CITED4, PAX1, MEN1, BRPF1, AGTR2, S1PR1, MYOCD, GATA6, SMARCD1, H2AFX, FOSL1, DDAH1, SERTAD2, AR, HSP90AA1, NODAL, RELA, SIX3, TP53, ARID1A, ESR2, HMGA1, CDK2, AHR, UBE2N, MAPK1, MED7, ASCL1, HNF4A, SIX1, PEBP1, TMX1, CNBP, ADORA2B, ELK1, FHL2, CALR, ERCC8, IGF1R, RGMB, REL, SQSTM1, HAND2, POU2F3, POU2F1, HINFP, TERF2, HNRNPAB, DVL3, IKZF2, CREB1, IGF1, TEA…	1174	644	13528	1.23461	1	0.898974	60.5179
GOTERM_BP_FAT	GO:0042542~response to hydrogen peroxide	10	0.628536	0.0503133	TXNIP, SLC8A1, NPTXR, STAR, HMOX1, RELA, DUOX2, PPP1R15B, FOSL1, SOD2	1174	56	13528	2.05768	1	0.898984	61.0057
GOTERM_BP_FAT	GO:0051186~cofactor metabolic process	25	1.57134	0.0507745	SUCLG2, ACO1, ALDH1L2, COQ7, GCLM, IDH3A, SDHAF1, SOD2, ACOT9, CIAO1, MTHFD2, DBT, PANK2, PANK3, HNF4A, FOLR1, HMOX1, ADH4, SDHD, VKORC1, NFE2L1, GLO1, QPRT, FPGS, ACSL6	1174	195	13528	1.47731	1	0.898123	61.3498
GOTERM_BP_FAT	GO:0042981~regulation of apoptosis	84	5.2797	0.0516252	DLC1, ZAK, TNFSF15, TNFSF14, CIAPIN1, CUL3, MEN1, BAG4, ZFP91, G2E3, AGTR2, HMOX1, ILK, RHOA, FOSL1, DHCR24, BCL2L14, SGK3, PTPRF, CD3E, RELA, PIM1, TP53, PIM3, ESR2, IL6R, JMY, MAPK1, SERPINB9, CD40LG, TIAL1, F2, MNT, TNFAIP3, MYO18A, FAIM2, TRAF1, DCC, TMX1, HMGB1, YWHAZ, XIAP, ERBB2, BCL2L2, BDKRB2, CALR, FEM1B, GCLM, IGF1R, VDR, SH3GLB1, SQSTM1, DDX19B, PYCARD, TGM2, BCL6, GLO1, DYRK2, TRAF6,…	1174	804	13528	1.2039	1	0.899088	61.9768
GOTERM_BP_FAT	GO:0010941~regulation of cell death	85	5.34255	0.0519133	DLC1, ZAK, TNFSF15, TNFSF14, CIAPIN1, CUL3, MEN1, BAG4, ZFP91, G2E3, AGTR2, HMOX1, ILK, RHOA, FOSL1, DHCR24, BCL2L14, SGK3, PTPRF, CD3E, RELA, PIM1, TP53, PIM3, ESR2, IL6R, JMY, MAPK1, SERPINB9, CD40LG, TIAL1, F2, MNT, TNFAIP3, MYO18A, FAIM2, TRAF1, DCC, TMX1, HMGB1, YWHAZ, XIAP, ERBB2, BCL2L2, BDKRB2, CALR, FEM1B, GCLM, VDR, IGF1R, SH3GLB1, SQSTM1, DDX19B, PYCARD, TGM2, BCL6, GLO1, DYRK2, TRAF6,…	1174	815	13528	1.20179	1	0.897455	62.187
GOTERM_BP_FAT	GO:0032880~regulation of protein localization	19	1.19422	0.0522942	YWHAB, TNFSF15, RHOQ, TNFSF14, DDX4, PKIA, PTPN11, SUMO1, GAPVD1, UACA, HNF4A, ANG, CD40LG, RHOA, PYCARD, NLRP12, TRAF6, EGF, ARHGDIA	1174	138	13528	1.5865	1	0.896267	62.4631
GOTERM_BP_FAT	GO:0018212~peptidyl-tyrosine modification	9	0.565682	0.0525243	TPST2, PRLR, ERBB2, DYRK1A, F2, CLK4, ABI2, EGF, ABL2	1174	48	13528	2.16056	1	0.894398	62.6291
GOTERM_BP_FAT	GO:0009967~positive regulation of signal transduction	35	2.19987	0.0529293	MAVS, CAV1, TMEM189-UBE2V1, GDF7, ERBB2, CSF1, PRRX1, TSPAN6, UBE2V1, SHOC2, MEN1, ZFP91, REL, MAP3K3, HMOX1, ILK, TGM2, RHOA, RHOC, EGF, TRAF6, CD3E, RELA, IGF1, IL6R, RICTOR, TMEM189, TRAT1, PTPN11, UBE2N, ASCL1, ACVR2B, NUP62, EPGN, TMOD2, PEBP1, CD226	1174	295	13528	1.36714	1	0.893356	62.9194
GOTERM_BP_FAT	GO:0045892~negative regulation of transcription, DNA-dependent	41	2.577	0.0535843	HMGB1, FOXK1, TSG101, HAT1, CALR, CBX5, MEN1, VDR, TRIM66, HOXC8, GATAD2A, POU2F1, BCL6, KDM5B, NFX1, HNRNPAB, SIM2, ZNF281, ZBTB7A, CTBP2, LDB1, NODAL, SIX3, MECP2, TP53, ZNF8, SKI, PHF12, TRIM24, PKIA, STAT3, PURB, FOXN3, CDKN1B, DR1, RPS14, MDM2, PRDM1, LCOR, NFIC, TBL1X	1174	356	13528	1.32709	1	0.893481	63.3845
GOTERM_BP_FAT	GO:0010638~positive regulation of organelle organization	13	0.817096	0.0536356	UBE2N, MEN1, CAV1, CDKN1B, PLEK, EPGN, RHOA, PEBP1, IGF1, RICTOR, EGF, TERF2, CD28	1174	83	13528	1.80481	1	0.890841	63.4207
GOTERM_BP_FAT	GO:0001933~negative regulation of protein amino acid phosphorylation	7	0.439975	0.0540942	MEN1, CAV1, HNF4A, SOCS1, NLRP12, PEBP1, BDKRB2	1174	32	13528	2.52066	1	0.890095	63.7427
GOTERM_BP_FAT	GO:0042493~response to drug	27	1.69705	0.0543724	TXNIP, CAV1, SLC8A1, YWHAZ, MFSD9, STAR, CREB1, ERBB2, RELA, SOCS1, HMGCS1, TP53, SLC47A1, CCL5, GCLM, STAT3, SOD2, SLC2A8, CCND1, BLOC1S3, FABP3, ABAT, PEBP1, GNAS, FPGS, FOSL1, ABCC6	1174	216	13528	1.44037	1	0.88853	63.9367
GOTERM_BP_FAT	GO:0006325~chromatin organization	43	2.7027	0.0565386	HMGB1, MEAF6, KDM6A, HMGN2, HIST1H2AG, FAM175A, SETD1B, ARID4B, NAP1L1, INO80, HAT1, CDC73, ARID2, CBX6, CBX5, MEN1, CHD9, BRPF1, SMARCD1, EED, H2AFX, TLK2, KDM5B, TERF2, HIST2H3A, CPA4, HIST1H2BD, TADA2A, SUV39H1, ARID1A, HMGA2, HMGA1, HIST2H3C, UBE2N, RPS6KA5, PHF15, SUPT16H, SETD7, H3F3B, SETD8, H3F3C, JMJD1C, HIST1H3G, SRCAP, MPHOSPH8	1174	378	13528	1.31082	1	0.895415	65.4144
GOTERM_BP_FAT	GO:0007596~blood coagulation	15	0.942803	0.0568636	F2RL2, F2RL3, PLEK, F2RL1, PLSCR1, THBD, HMCN1, CD36, HNF4A, FGB, CD40LG, BLOC1S3, KIAA1715, F2, TFPI	1174	102	13528	1.69456	1	0.894105	65.6311
GOTERM_BP_FAT	GO:0050817~coagulation	15	0.942803	0.0568636	F2RL2, F2RL3, PLEK, F2RL1, PLSCR1, THBD, HMCN1, CD36, HNF4A, FGB, CD40LG, BLOC1S3, KIAA1715, F2, TFPI	1174	102	13528	1.69456	1	0.894105	65.6311
GOTERM_BP_FAT	GO:0008654~phospholipid biosynthetic process	15	0.942803	0.0568636	IMPA1, FADS1, TAZ, PIGS, LPCAT3, PIGO, DGKE, PIGG, SH3GLB1, FABP3, ETNK1, PCYT1A, PTDSS1, AGPAT4, PLA2G5	1174	102	13528	1.69456	1	0.894105	65.6311
GOTERM_BP_FAT	GO:0000302~response to reactive oxygen species	12	0.754243	0.0577353	TXNIP, SLC8A1, NPTXR, STAR, HMOX1, RELA, DUOX2, ROMO1, PPP1R15B, FOSL1, SOD2, FANCC	1174	75	13528	1.84368	1	0.895142	66.206
GOTERM_BP_FAT	GO:0010629~negative regulation of gene expression	55	3.45695	0.0600279	FOXK1, TSG101, XPO5, CBX5, MEN1, HOXC8, EED, KDM5B, NFX1, ZNF281, CTBP2, LDB1, NODAL, SIX3, MECP2, TP53, ZNF8, PKIA, PURB, FOXN3, RPS14, MDM2, CELF1, PRDM1, LCOR, HMGB1, HAT1, CALR, VDR, SUMO1, TRIM66, TNRC6C, POU2F1, GATAD2A, HINFP, PER1, BCL6, TNRC6B, TNRC6A, TDRD1, SIM2, HNRNPAB, ZBTB7A, YWHAB, SKI, PHF12, TRIM24, STAT3, CDKN1B, DR1, PHB2, SETD8, SMURF2, NFIC, TBL1X	1174	504	13528	1.25747	1	0.901868	67.675
GOTERM_BP_FAT	GO:0048193~Golgi vesicle transport	18	1.13136	0.0603761	TMX1, COPA, SEC31A, STX7, SEC24A, OPTN, ERGIC1, RAB3IP, KIF1C, AP1S1, COG7, BLOC1S3, AP3B2, SH3D19, GOLGA5, SAR1A, SEC23B, DNM2	1174	131	13528	1.58331	1	0.900706	67.8927
GOTERM_BP_FAT	GO:0017038~protein import	18	1.13136	0.0603761	GRPEL2, YWHAZ, MTX3, SIX3, TP53, TIMM10, TIMM8A, MAPK1, RPL23, TOMM70A, NUP205, F2, KPNA6, BCL6, KPNA5, KPNA4, KPNA2, KPNA1	1174	131	13528	1.58331	1	0.900706	67.8927
GOTERM_BP_FAT	GO:0030518~steroid hormone receptor signaling pathway	10	0.628536	0.0607113	AR, MED4, YWHAH, KLF9, MED16, FHL2, ARID1A, ESR2, CALR, PMEPA1	1174	58	13528	1.98672	1	0.899506	68.101
GOTERM_BP_FAT	GO:0016310~phosphorylation	83	5.21684	0.060969	PRPF4B, STK38, ZAK, GDF7, CCNT1, DSTYK, AURKA, PRKG2, LATS2, PRKX, CSNK2A1, COL4A3BP, ILK, CLK4, MASTL, TLK2, GOLGA5, SIK2, CDK13, TYRO3, SGK3, MYO3A, MYLK3, TAZ, PIM1, MINK1, PIM3, CDK6, CDK4, WEE1, CDK2, ATP6V1F, PRKCB, MARK2, MAPK1, ACVR2B, PLCE1, CCND1, KSR2, CDKL1, CAMK4, MAPK4, F2, NEK8, TXK, NEK4, ERC1, FRK, ADORA2B, ERBB2, MAP4K2, ADRBK2, ABI2, TRIB3, ATP5G1, IGF1R, MAP3K3, MAP3K2, LMTK2,…	1174	800	13528	1.19551	1	0.898013	68.2603
GOTERM_BP_FAT	GO:0070271~protein complex biogenesis	55	3.45695	0.0612679	CAPZA2, IDE, CAPZA1, KNTC1, ZFP91, MAZ, ANG, ILK, SLC1A1, MDN1, FANCA, FANCC, HSP90AA1, CD3E, TAZ, TP53, GTF2H3, PFKM, HMGA1, MED7, MED4, PTRF, TBCA, MED16, RRM2, NUP205, RRM1, PEBP1, MDM2, VAMP3, LAMC1, AMFR, TRAF1, CAV1, CALR, POLR2D, SDHAF1, SF3B3, IGF1R, FGB, TGM2, GTF3C4, SCO1, MUC20, CNKSR3, YWHAB, SKI, TRIM24, GJB1, SOD2, PSMG1, PRLR, GTF2F1, MYH11, QPRT	1174	505	13528	1.25498	1	0.896693	68.4441
GOTERM_BP_FAT	GO:0006461~protein complex assembly	55	3.45695	0.0612679	CAPZA2, IDE, CAPZA1, KNTC1, ZFP91, MAZ, ANG, ILK, SLC1A1, MDN1, FANCA, FANCC, HSP90AA1, CD3E, TAZ, TP53, GTF2H3, PFKM, HMGA1, MED7, MED4, PTRF, TBCA, MED16, RRM2, NUP205, RRM1, PEBP1, MDM2, VAMP3, LAMC1, AMFR, TRAF1, CAV1, CALR, POLR2D, SDHAF1, SF3B3, IGF1R, FGB, TGM2, GTF3C4, SCO1, MUC20, CNKSR3, YWHAB, SKI, TRIM24, GJB1, SOD2, PSMG1, PRLR, GTF2F1, MYH11, QPRT	1174	505	13528	1.25498	1	0.896693	68.4441
GOTERM_BP_FAT	GO:0046777~protein amino acid autophosphorylation	13	0.817096	0.0623097	MYO3A, ERBB2, PIM1, SMG1, TRIM24, IGF1R, CSNK2A1, MAP3K3, DYRK1A, CLK4, LMTK2, YES1, CAMK2A	1174	85	13528	1.76234	1	0.898288	69.0769
GOTERM_BP_FAT	GO:0051276~chromosome organization	53	3.33124	0.0632098	KDM6A, HMGN2, FAM175A, ARID4B, NAP1L1, INO80, CBX6, CBX5, MEN1, CDCA8, BRPF1, SEH1L, SMARCD1, EED, H2AFX, TLK2, KDM5B, TADA2A, TP53, ARID1A, HMGA2, HMGA1, NCAPD2, UBE2N, ZWINT, PELO, JMJD1C, SRCAP, HMGB1, MEAF6, HIST1H2AG, SETD1B, HAT1, CDC73, ARID2, CHD9, TERF2, BUB3, PINX1, HIST2H3A, CPA4, HIST1H2BD, SUV39H1, HIST2H3C, SMC4, RPS6KA5, PHF15, SUPT16H, TEP1, SETD7, H3F3B, SETD8, H3F3C, HIST1H3G, M…	1174	485	13528	1.25921	1	0.899295	69.614
GOTERM_BP_FAT	GO:0006259~DNA metabolic process	55	3.45695	0.063531	FAM175A, NAP1L1, MEN1, PRIM1, MCM8, H2AFX, FANCA, FANCC, USP1, DDB1, TP53, GTF2H3, PAPD5, GTF2H5, RMI1, HMGA1, CDK2, JMY, UBE2N, KRBA2, RFC2, CD40LG, RRM2, TBRG1, RRM1, KPNA2, MYO18A, HMGB1, TMX1, SHFM1, TIPIN, SMUG1, RBX1, ERCC8, SUMO1, GATAD2A, HINFP, FBXO6, POLQ, EGF, TERF2, TDRD1, FEN1, PINX1, CINP, SMG1, SPHAR, IGF1, SOD2, POLD3, ATXN3, SUPT16H, TEP1, NFIC, PARP2	1174	506	13528	1.2525	1	0.898107	69.8035
GOTERM_BP_FAT	GO:0006644~phospholipid metabolic process	24	1.50849	0.0638657	IMPA1, PLEK, FADS1, TAZ, PIP5K1C, SMG1, PIGS, FIG4, LPCAT3, PIGO, PLCE1, DGKE, PIGG, GATA6, SH3GLB1, PLA2G12A, PLCG2, FABP3, ETNK1, PCYT1A, AGPAT4, PTDSS1, PLA2G2D, PLA2G5	1174	190	13528	1.45554	1	0.89698	69.9997
GOTERM_BP_FAT	GO:0019637~organophosphate metabolic process	25	1.57134	0.0643702	IMPA1, PLEK, FADS1, TAZ, PIP5K1C, SMG1, PIGS, FIG4, LPCAT3, PIGO, PLCE1, DGKE, PIGG, GATA6, SH3GLB1, PLA2G12A, PLCG2, FABP3, ETNK1, PCYT1A, GK5, AGPAT4, PTDSS1, PLA2G2D, PLA2G5	1174	200	13528	1.44037	1	0.896507	70.2933
GOTERM_BP_FAT	GO:0044087~regulation of cellular component biogenesis	19	1.19422	0.0655938	DLC1, COL4A4, HMGB1, CAV1, PLEK, ACTR3B, CAPZA2, CAPZA1, RHOQ, RICTOR, AHR, SUMO1, S1PR1, CDKN1B, RHOA, TMSB4X, ACTR3C, CDC42EP4, MDN1	1174	142	13528	1.54181	1	0.898707	70.9941
GOTERM_BP_FAT	GO:0051253~negative regulation of RNA metabolic process	41	2.577	0.0662317	HMGB1, FOXK1, TSG101, HAT1, CALR, CBX5, MEN1, VDR, TRIM66, HOXC8, GATAD2A, POU2F1, BCL6, KDM5B, NFX1, HNRNPAB, SIM2, ZNF281, ZBTB7A, CTBP2, LDB1, NODAL, SIX3, MECP2, TP53, ZNF8, SKI, PHF12, TRIM24, PKIA, STAT3, PURB, FOXN3, CDKN1B, DR1, RPS14, MDM2, PRDM1, LCOR, NFIC, TBL1X	1174	362	13528	1.30509	1	0.898722	71.3532
GOTERM_BP_FAT	GO:0065003~macromolecular complex assembly	70	4.39975	0.0667208	CAPZA2, IDE, CAPZA1, NAP1L1, SNRPD1, KNTC1, ZFP91, MAZ, ANG, ILK, H2AFX, SLC1A1, MDN1, FANCA, FANCC, HSP90AA1, CD3E, NIP7, TAZ, TP53, GTF2H3, PFKM, HMGA1, MED7, MED4, PTRF, MED16, TBCA, RRM2, RPS14, NUP205, RRM1, MDM2, PEBP1, VAMP3, CELF1, AMFR, LAMC1, ZNHIT6, TRAF1, CAV1, HIST1H2AG, POLR2D, CALR, BMS1, SF3B3, SDHAF1, IGF1R, FGB, TGM2, GTF3C4, SCO1, HIST2H3A, HIST1H2BD, TSR1, CNKSR3, MUC20, YWHAB…	1174	665	13528	1.21295	1	0.898203	71.6258
GOTERM_BP_FAT	GO:0046474~glycerophospholipid biosynthetic process	11	0.691389	0.067325	IMPA1, PIGG, SH3GLB1, TAZ, FABP3, ETNK1, PIGS, PCYT1A, PTDSS1, PIGO, PLA2G5	1174	68	13528	1.86401	1	0.898105	71.959
GOTERM_BP_FAT	GO:0051591~response to cAMP	8	0.502828	0.0673705	THBD, CCND2, RELA, DUOX2, PEBP1, IL6R, FOSL1, PLA2G5	1174	42	13528	2.19486	1	0.896007	71.984
GOTERM_BP_FAT	GO:0051052~regulation of DNA metabolic process	16	1.00566	0.0675793	TMEM189-UBE2V1, FAM175A, USP1, TP53, TIPIN, UBE2V1, IGF1, TMEM189, CALR, CDK2, UBE2N, IGF1R, ERCC8, BCL6, H2AFX, KPNA2, KPNA1, TERF2	1174	114	13528	1.61726	1	0.894503	72.0981
GOTERM_BP_FAT	GO:0046486~glycerolipid metabolic process	21	1.31992	0.0680229	CAV1, MOGAT1, IMPA1, PLEK, TAZ, PIP5K1C, SMG1, PIGS, FIG4, PNPLA3, PIGO, PTPN11, PLCE1, PIGG, ANG, SH3GLB1, FABP3, ETNK1, PCYT1A, PTDSS1, PLA2G5	1174	162	13528	1.49372	1	0.893861	72.3393
GOTERM_BP_FAT	GO:0000209~protein polyubiquitination	6	0.377121	0.0692793	ERCC8, G2E3, TMEM189-UBE2V1, UBE4A, UBE2V1, AMFR, TMEM189, TRAF6	1174	26	13528	2.65915	1	0.896128	73.0117
GOTERM_BP_FAT	GO:0010212~response to ionizing radiation	10	0.628536	0.0723889	MEN1, ERCC8, CAV1, CCND1, THBD, FAM175A, TP53, H2AFX, IL6R, SOD2	1174	60	13528	1.9205	1	0.90446	74.6101
GOTERM_BP_FAT	GO:0046460~neutral lipid biosynthetic process	4	0.251414	0.079165	MOGAT1, PLCE1, ANG, PNPLA3	1174	12	13528	3.841	1	0.922205	77.7888
GOTERM_BP_FAT	GO:0048814~regulation of dendrite morphogenesis	4	0.251414	0.079165	YWHAH, PTPRF, ILK, NUMBL	1174	12	13528	3.841	1	0.922205	77.7888
GOTERM_BP_FAT	GO:0046463~acylglycerol biosynthetic process	4	0.251414	0.079165	MOGAT1, PLCE1, ANG, PNPLA3	1174	12	13528	3.841	1	0.922205	77.7888
GOTERM_BP_FAT	GO:0009891~positive regulation of biosynthetic process	72	4.52546	0.0795508	EVX1, FOXK1, ELF4, GDF7, RHOQ, CITED4, PAX1, MEN1, BRPF1, AGTR2, S1PR1, MYOCD, GATA6, HMOX1, SMARCD1, FOSL1, DDAH1, SERTAD2, AR, HSP90AA1, CD3E, NODAL, RELA, SIX3, TP53, ARID1A, ESR2, CDK4, HMGA1, AHR, CDK2, MAPK1, MED7, ASCL1, HNF4A, F2, SIX1, TMX1, CNBP, ADORA2B, ELK1, FHL2, CALR, IGF1R, RGMB, REL, SQSTM1, HAND2, POU2F3, POU2F1, HINFP, DYRK2, TRAF6, CD28, HNRNPAB, DVL3, IKZF2, CREB1, TNFRSF13C,…	1174	695	13528	1.19375	1	0.921395	77.9579
GOTERM_BP_FAT	GO:0055080~cation homeostasis	33	2.07417	0.0809166	CLDN16, SLC9A8, CAV1, JPH2, F2RL1, BDKRB2, CCL5, CALR, VDR, S1PR1, HMOX1, TGM2, SLC30A4, SLC30A5, NEDD4L, JPH1, SCO1, MAFG, SLC8A1, ACO1, TP53, ATP1A2, TRIM24, CSRP3, SOD2, PRKCB, PLCE1, CCR6, TFRC, ADM, CCR4, F2, PLCG2	1174	286	13528	1.32958	1	0.923124	78.547
GOTERM_BP_FAT	GO:0007599~hemostasis	15	0.942803	0.0832306	F2RL2, F2RL3, PLEK, F2RL1, PLSCR1, THBD, HMCN1, CD36, HNF4A, FGB, CD40LG, BLOC1S3, KIAA1715, F2, TFPI	1174	108	13528	1.60042	1	0.927096	79.5113
GOTERM_BP_FAT	GO:0031328~positive regulation of cellular biosynthetic process	71	4.4626	0.0835599	EVX1, FOXK1, ELF4, GDF7, RHOQ, CITED4, PAX1, MEN1, BRPF1, AGTR2, S1PR1, MYOCD, GATA6, HMOX1, SMARCD1, FOSL1, DDAH1, SERTAD2, AR, HSP90AA1, CD3E, NODAL, RELA, SIX3, TP53, ARID1A, ESR2, CDK4, HMGA1, CDK2, AHR, MAPK1, MED7, ASCL1, HNF4A, SIX1, TMX1, CNBP, ADORA2B, ELK1, FHL2, CALR, IGF1R, RGMB, REL, SQSTM1, HAND2, POU2F3, POU2F1, HINFP, DYRK2, TRAF6, CD28, HNRNPAB, DVL3, IKZF2, CREB1, TNFRSF13C, ARP…	1174	685	13528	1.19435	1	0.926184	79.6451
GOTERM_BP_FAT	GO:0033043~regulation of organelle organization	26	1.63419	0.0872235	DLC1, CAV1, STMN3, PLEK, ACTR3B, CAPZA2, CAPZA1, IGF1, RHOQ, RICTOR, PIN1, UBE2N, MEN1, S1PR1, CDKN1B, EPGN, ILK, RHOA, PEBP1, TMSB4X, ACTR3C, TLK2, EGF, TERF2, CDK13, CD28	1174	217	13528	1.38064	1	0.932922	81.0795
GOTERM_BP_FAT	GO:0043254~regulation of protein complex assembly	13	0.817096	0.0878754	HMGB1, SUMO1, CAV1, CDKN1B, PLEK, ACTR3B, CAPZA2, CAPZA1, TMSB4X, ACTR3C, RICTOR, MDN1, AHR	1174	90	13528	1.66443	1	0.932752	81.3245
GOTERM_BP_FAT	GO:0042532~negative regulation of tyrosine phosphorylation of STAT protein	3	0.188561	0.0890905	CAV1, HNF4A, SOCS1	1174	6	13528	5.7615	1	0.933788	81.7732
GOTERM_BP_FAT	GO:0050775~positive regulation of dendrite morphogenesis	3	0.188561	0.0890905	PTPRF, ILK, NUMBL	1174	6	13528	5.7615	1	0.933788	81.7732
GOTERM_BP_FAT	GO:0035304~regulation of protein amino acid dephosphorylation	3	0.188561	0.0890905	DLC1, YWHAB, YWHAE	1174	6	13528	5.7615	1	0.933788	81.7732
GOTERM_BP_FAT	GO:0045672~positive regulation of osteoclast differentiation	3	0.188561	0.0890905	CSF1, GNAS, CCL5	1174	6	13528	5.7615	1	0.933788	81.7732
GOTERM_BP_FAT	GO:0042312~regulation of vasodilation	5	0.314268	0.0891712	CAV1, AGTR2, ADM, HMOX1, NPR1	1174	20	13528	2.88075	1	0.932406	81.8026
GOTERM_BP_FAT	GO:0010811~positive regulation of cell-substrate adhesion	6	0.377121	0.0898986	CD36, SMOC1, CSF1, ILK, CCDC80, CDK6	1174	28	13528	2.46921	1	0.932407	82.0659
GOTERM_BP_FAT	GO:0016567~protein ubiquitination	16	1.00566	0.0903472	RNF144B, TMEM189-UBE2V1, UBE4A, TSG101, DDB1, UBE2V1, CDC73, MYLIP, CBLL1, TMEM189, UBE2N, ERCC8, G2E3, GSPT1, MDM2, NEDD4L, AMFR, TRAF6	1174	119	13528	1.54931	1	0.93182	82.2265
GOTERM_BP_FAT	GO:0042326~negative regulation of phosphorylation	8	0.502828	0.0908301	MEN1, CAV1, CDKN1B, HNF4A, SOCS1, NLRP12, PEBP1, BDKRB2	1174	45	13528	2.04853	1	0.93131	82.3979
GOTERM_BP_FAT	GO:0055066~di-, tri-valent inorganic cation homeostasis	28	1.7599	0.0935033	CAV1, JPH2, F2RL1, BDKRB2, CALR, CCL5, VDR, S1PR1, HMOX1, SLC30A4, TGM2, SLC30A5, JPH1, SCO1, SLC8A1, ACO1, ATP1A2, TRIM24, CSRP3, SOD2, PRKCB, PLCE1, CCR6, TFRC, ADM, CCR4, F2, PLCG2	1174	239	13528	1.34997	1	0.93531	83.3185
GOTERM_BP_FAT	GO:0032101~regulation of response to external stimulus	20	1.25707	0.0946727	ZFP36, CAV1, IL2RA, ADORA2B, PLEK, OSMR, C3, F2RL1, IL6R, TRIM24, CCL5, ZFP91, S1PR1, UACA, CCR4, F2, NLRP12, VKORC1, TGM2, BCL6	1174	159	13528	1.44943	1	0.936163	83.7067
GOTERM_BP_FAT	GO:0046504~glycerol ether biosynthetic process	4	0.251414	0.0965287	MOGAT1, PLCE1, ANG, PNPLA3	1174	13	13528	3.54554	1	0.938293	84.3054
GOTERM_BP_FAT	GO:0030866~cortical actin cytoskeleton organization	4	0.251414	0.0965287	PLEK, EPB41, RHOQ, CALR	1174	13	13528	3.54554	1	0.938293	84.3054
GOTERM_BP_FAT	GO:0032648~regulation of interferon-beta production	4	0.251414	0.0965287	MAVS, POLR3F, POLR3A, POLR3D	1174	13	13528	3.54554	1	0.938293	84.3054
GOTERM_BP_FAT	GO:0044265~cellular macromolecule catabolic process	74	4.65116	0.0976478	TMEM189-UBE2V1, TSG101, UBE2G2, IDE, RNF216, MYLIP, KLHL3, ZYG11B, CUL3, G2E3, ZYG11A, ATG7, FBXO27, KLHL21, DDA1, YOD1, RNF149, USP14, NFX1, PAN2, ZFP36, UFD1L, DDB1, RELA, USP1, SOCS1, GTF2H3, SOCS5, TMEM189, UBE2N, CD36, BACE2, KLHL15, MDM2, AMFR, TNFAIP3, ATG10, XIAP, PNPT1, UBE2V1, UBA6, CBLL1, ASB16, FEM1B, SMUG1, RBX1, PSMB5, SUMO2, ARIH1, SUMO1, UEVLD, SQSTM1, UFM1, PSMB2, FBXO6, OTUD7B, …	1174	725	13528	1.17614	1	0.938985	84.6563
GOTERM_BP_FAT	GO:0031349~positive regulation of defense response	11	0.691389	0.0981362	POLR3F, MICA, ADORA2B, C3, OSMR, RELA, NLRP12, TGM2, CCL5, CD226, POLR3D	1174	73	13528	1.73634	1	0.93851	84.8071
GOTERM_BP_FAT	GO:0016481~negative regulation of transcription	49	3.07982	0.098747	FOXK1, TSG101, CBX5, MEN1, HOXC8, EED, KDM5B, NFX1, ZNF281, CTBP2, NODAL, LDB1, TP53, MECP2, SIX3, ZNF8, PKIA, FOXN3, PURB, RPS14, MDM2, PRDM1, LCOR, HMGB1, HAT1, CALR, VDR, TRIM66, SUMO1, HINFP, GATAD2A, POU2F1, PER1, BCL6, SIM2, HNRNPAB, ZBTB7A, YWHAB, SKI, TRIM24, PHF12, STAT3, CDKN1B, PHB2, DR1, SMURF2, SETD8, NFIC, TBL1X	1174	459	13528	1.23012	1	0.938264	84.9937
GOTERM_BP_FAT	GO:0050867~positive regulation of cell activation	15	0.942803	0.0989284	IL2RA, ADORA2B, PLEK, CD3E, TNFRSF13C, TNFSF14, IL15, SOCS5, VCAM1, BLOC1S3, AP3D1, BCL6, TRAF6, CD226, CD28	1174	111	13528	1.55716	1	0.937232	85.0487
GOTERM_BP_FAT	GO:0018108~peptidyl-tyrosine phosphorylation	8	0.502828	0.0995499	PRLR, ERBB2, DYRK1A, F2, CLK4, ABI2, EGF, ABL2	1174	46	13528	2.004	1	0.937016	85.2357
GOTERM_BP_FAT	GO:0031668~cellular response to extracellular stimulus	10	0.628536	0.0996399	VDR, CAV1, ATG9A, ADORA2B, MYOCD, HMOX1, FADS1, TP53, FOSL1, TNRC6A	1174	64	13528	1.80047	1	0.93582	85.2626
