# Supplementary material for: Comprehensive Expression Profiling and Functional Network Analysis of Porphyra-334, One Mycosporine-Like Amino Acid (MAA), in Human Keratinocyte Exposed with UV-radiation
Source: Mar Drugs. 2017 Jun 24;15(7):196. doi: 10.3390/md15070196 (PMC5532638; doi:10.3390/md15070196)
Supplement: Supplementary file 1 [file marinedrugs-15-00196-s001.zip › Supplementary Table S4.xlsx]

## Sheet: DAVID_209
Category	Term	Count	%	P value	Genes	List Total	Pop Hits	Pop Total	Fold Enrichment	Bonferroni	Benjamini	FDR
SP_PIR_KEYWORDS	acetylation	69	34.5	8.71645e-14	HIST2H2AA3, ABCF2, EDC4, RANGAP1, AURKB, GSS, FAM168A, BAK1, EIF4EBP1, ATAD3A, DYNLL1, RBM8A, RPS3A, MSN, PPP4C, SUPT5H, PABPN1, EFTUD2, SUCLG1, CORO7, TMEM189, SARS2, CD3EAP, ADRM1, MTMR14, RPS16, NLE1, RUVBL2, TMSB4X, UBB, UBE2S, GSTP1, C12ORF57, TUFM, MYL6, ASS1, LMNB2, HIST1H2AE, ADH5, RPL36, VARS, CAPZB, CDC37, PIN1, RBX1, RPS28, PSMB1, COX6B1, HSPA6, KDM3B, EMD, ACTB, SHMT2, NPLOC4, TSEN54,…	198	2635	19235	2.54387	2.30954e-11	2.30954e-11	1.14253e-10
SP_PIR_KEYWORDS	phosphoprotein	117	58.5	1.28607e-09	EIF6, HIST2H2AA3, KIFC1, PLXNA3, TUBB2B, TUBB2A, RANGAP1, AURKA, AURKB, EIF4EBP1, RBM8A, PDE4A, ZNF444, SUPT5H, RAPGEF1, SAR1A, AUP1, PABPN1, EFTUD2, SUCLG1, PIM3, CORO7, PDE4C, YIF1B, SARS2, MED19, ADRM1, NLE1, CMIP, MYL6, ASS1, LMNB2, CHCHD2, SOX4, STK17A, TTC5, CAPZB, CDC37, RBX1, PIN1, RPS28, EIF3G, PSMB1, EMD, TRAF4, RAB8A, TSEN54, MKI67, CDC20, SUGT1, DDX6, RPL18A, PSMC3, RFX1, H3F3B, H3F3C…	198	7263	19235	1.56494	3.40808e-07	1.70404e-07	1.68603e-06
GOTERM_BP_FAT	GO:0006412~translation	19	9.5	5.43747e-08	EIF6, TUFM, MRPL2, MRPS11, RPL36, MRPL9, MRPS21, LRRC47, VARS, SARS2, RPL29, RPS28, RPS16, RPL41, RPL18A, EIF3G, RPS3A, FAU, UBB	158	331	13528	4.91476	5.88317e-05	5.88317e-05	8.67732e-05
GOTERM_CC_FAT	GO:0030529~ribonucleoprotein complex	23	11.5	1.25944e-07	HNRNPA1L2, ACTB, PABPN1, MRPL2, ZMAT5, EFTUD2, PPIL1, SNRPD3, MRPS11, EDC4, MRPL9, RPL36, MRPS21, RPL29, DDX6, RPS28, RPS16, RPL18A, RPL41, RPS3A, RBM8A, FAU, UBB	150	515	12782	3.80564	3.11078e-05	3.11078e-05	0.000163303
SP_PIR_KEYWORDS	ribonucleoprotein	16	8	1.98498e-07	MRPL2, HNRNPA1L2, EFTUD2, SNRPD3, MRPS11, RPL36, MRPL9, MRPS21, RPL29, RPS28, RPL41, RPL18A, RPS16, RPS3A, FAU, UBB	198	279	19235	5.57112	5.26005e-05	1.75338e-05	0.00026023
GOTERM_BP_FAT	GO:0006414~translational elongation	11	5.5	2.58424e-07	TUFM, RPS28, RPL18A, RPL41, RPS16, RPS3A, RPL36, FAU, UBB, VARS, RPL29	158	101	13528	9.32498	0.000279576	0.000139798	0.000412402
SP_PIR_KEYWORDS	ribosomal protein	13	6.5	5.62193e-07	MRPL2, RPS28, RPS16, RPL18A, RPL41, RPS3A, MRPS11, MRPL9, RPL36, FAU, MRPS21, UBB, RPL29	198	188	19235	6.71757	0.00014897	3.72446e-05	0.000737031
SP_PIR_KEYWORDS	protein biosynthesis	13	6.5	5.62193e-07	EIF6, TUFM, RPS28, RPS16, EIF3G, RPL18A, RPS3A, RPL36, FAU, UBB, VARS, SARS2, RPL29	198	188	19235	6.71757	0.00014897	3.72446e-05	0.000737031
GOTERM_MF_FAT	GO:0003735~structural constituent of ribosome	13	6.5	7.77615e-07	MRPL2, RPS28, RPS16, RPL18A, RPL41, RPS3A, MRPS11, MRPL9, RPL36, FAU, MRPS21, UBB, RPL29	156	168	12983	6.43998	0.000275238	0.000275238	0.00106532
GOTERM_CC_FAT	GO:0005829~cytosol	37	18.5	1.00114e-06	PTGES2, ATOX1, SNRPD3, RPL36, KLC2, VARS, APOBEC3F, CDC37, CKB, RBX1, BAK1, EIF4EBP1, RPS28, EIF3G, PSMB1, DYNLL1, RPS3A, PDE4A, FAU, RAPGEF1, ACTB, ARL2, NPLOC4, ACY1, CORO7, CDC20, PDE4C, TUBGCP2, LDLRAP1, RPL29, PSMB9, CHMP1B, RPL18A, RPS16, RPL41, TCEB2, UBB	150	1330	12782	2.3706	0.000247251	0.000123633	0.0012981
GOTERM_CC_FAT	GO:0033279~ribosomal subunit	11	5.5	2.39916e-06	RPS28, RPL18A, RPL41, RPS16, RPS3A, MRPS11, RPL36, FAU, MRPS21, UBB, RPL29	150	128	12782	7.32302	0.000592418	0.000197512	0.00311077
GOTERM_CC_FAT	GO:0043232~intracellular non-membrane-bounded organelle	55	27.5	4.34862e-06	EIF6, HIST2H2AA3, KIFC1, ZMAT5, TUBB2B, TUBB2A, SNRPD3, AURKA, RANGAP1, AURKB, APOBEC3F, DYNLL1, GRWD1, RPS3A, AEN, FAU, MSN, PPP4C, MRPL2, ARL2, PABPN1, MRPL9, CDK9, CD3EAP, RPL41, RPS16, NLE1, TMSB4X, UBB, TUFM, MYL6, LMNB2, MRPS11, HIST1H2AE, RPL36, KLC2, CAPZB, RPS28, KDM3B, EMD, HAP1, ACTB, SHMT2, TSEN54, GABARAPL1, MKI67, MRPS21, CDC20, SUGT1, TUBGCP2, RPL29, RPL18A, H3F3B, H3F3C, RNF40	150	2596	12782	1.80537	0.00107354	0.000268492	0.0056384
GOTERM_CC_FAT	GO:0043228~non-membrane-bounded organelle	55	27.5	4.34862e-06	EIF6, HIST2H2AA3, KIFC1, ZMAT5, TUBB2B, TUBB2A, SNRPD3, AURKA, RANGAP1, AURKB, APOBEC3F, DYNLL1, GRWD1, RPS3A, AEN, FAU, MSN, PPP4C, MRPL2, ARL2, PABPN1, MRPL9, CDK9, CD3EAP, RPL41, RPS16, NLE1, TMSB4X, UBB, TUFM, MYL6, LMNB2, MRPS11, HIST1H2AE, RPL36, KLC2, CAPZB, RPS28, KDM3B, EMD, HAP1, ACTB, SHMT2, TSEN54, GABARAPL1, MKI67, MRPS21, CDC20, SUGT1, TUBGCP2, RPL29, RPL18A, H3F3B, H3F3C, RNF40	150	2596	12782	1.80537	0.00107354	0.000268492	0.0056384
GOTERM_CC_FAT	GO:0022626~cytosolic ribosome	9	4.5	4.42669e-06	RPS28, RPL18A, RPL41, RPS16, RPS3A, RPL36, FAU, UBB, RPL29	150	81	12782	9.46815	0.0010928	0.000218655	0.00573962
GOTERM_CC_FAT	GO:0005840~ribosome	13	6.5	7.92355e-06	MRPL2, RPS28, RPS16, RPL18A, RPL41, RPS3A, MRPS11, MRPL9, RPL36, FAU, MRPS21, UBB, RPL29	150	215	12782	5.15243	0.00195521	0.000326134	0.0102734
SP_PIR_KEYWORDS	ribosome	8	4	9.77635e-06	RPS28, RPL18A, RPS16, RPS3A, RPL36, FAU, UBB, RPL29	198	73	19235	10.6462	0.00258739	0.000518015	0.012816
GOTERM_CC_FAT	GO:0031974~membrane-enclosed lumen	42	21	2.55134e-05	EIF6, TUFM, ZMAT5, LMNB2, SNRPD3, MRPS11, RPL36, TIMM50, APOBEC3F, RBM8A, GRWD1, RPS3A, AEN, COX6B1, MSN, KDM3B, SUPT5H, NTHL1, PABPN1, TXNIP, ACTB, ATF7IP, SHMT2, TSEN54, CEBPB, MKI67, ACADS, SUCLG1, MRPL9, CDK9, CDC20, MRPS21, SARS2, POLR3D, CD3EAP, MED19, PPIB, NLE1, TCEB2, RUVBL2, UBB, PBX2	150	1856	12782	1.92832	0.00628209	0.000899867	0.0330764
GOTERM_CC_FAT	GO:0070013~intracellular organelle lumen	40	20	5.12669e-05	EIF6, TUFM, ZMAT5, LMNB2, SNRPD3, MRPS11, RPL36, TIMM50, APOBEC3F, RBM8A, GRWD1, RPS3A, AEN, MSN, KDM3B, SUPT5H, NTHL1, PABPN1, ACTB, ATF7IP, TSEN54, SHMT2, CEBPB, MKI67, ACADS, SUCLG1, MRPL9, CDK9, CDC20, MRPS21, SARS2, POLR3D, CD3EAP, MED19, PPIB, TCEB2, NLE1, RUVBL2, UBB, PBX2	150	1779	12782	1.91598	0.0125834	0.00158165	0.0664537
GOTERM_MF_FAT	GO:0005198~structural molecule activity	21	10.5	6.57652e-05	MYL6, ACTB, MRPL2, TUBB2B, TUFT1, LMNB2, TUBB2A, MRPS11, RPL36, MRPL9, MRPS21, LDLRAP1, RPL29, RPS28, RPS16, RPL41, RPL18A, RPS3A, FAU, UBB, MSN	156	634	12983	2.75664	0.0230127	0.0115733	0.09006
GOTERM_CC_FAT	GO:0043233~organelle lumen	40	20	8.49839e-05	EIF6, TUFM, ZMAT5, LMNB2, SNRPD3, MRPS11, RPL36, TIMM50, APOBEC3F, RBM8A, GRWD1, RPS3A, AEN, MSN, KDM3B, SUPT5H, NTHL1, PABPN1, ACTB, ATF7IP, TSEN54, SHMT2, CEBPB, MKI67, ACADS, SUCLG1, MRPL9, CDK9, CDC20, MRPS21, SARS2, POLR3D, CD3EAP, MED19, PPIB, TCEB2, NLE1, RUVBL2, UBB, PBX2	150	1820	12782	1.87282	0.0207731	0.00232972	0.110136
GOTERM_CC_FAT	GO:0015935~small ribosomal subunit	7	3.5	8.91733e-05	RPS28, RPS16, RPS3A, MRPS11, FAU, MRPS21, UBB	150	63	12782	9.46815	0.021786	0.00220026	0.115563
SP_PIR_KEYWORDS	ubl conjugation	18	9	0.000121543	TXNIP, ARL2, HIST2H2AA3, CEBPB, SUCLG1, HIST1H2AE, RANGAP1, AURKA, CDC20, UQCRQ, APOBEC3F, CDC37, RPL29, ADRM1, PSMC3, H3F3B, UBB, UBE2S	198	588	19235	2.97387	0.0316975	0.00535408	0.159225
GOTERM_CC_FAT	GO:0005739~mitochondrion	28	14	0.000129949	TUFM, ABCF2, PTGES2, MRPS11, ADH5, CHCHD2, TIMM50, VARS, UQCRQ, APOBEC3F, TACO1, CKB, BAK1, NDUFS5, COX6B1, NTHL1, TXNIP, MRPL2, PABPN1, SHMT2, NDUFB10, ACADS, SUCLG1, MRPL9, MRPS21, SARS2, PRELID1, MCCD1	150	1087	12782	2.19501	0.0315897	0.00291387	0.168364
SP_PIR_KEYWORDS	methylation	11	5.5	0.000203443	PABPN1, ACTB, HIST2H2AA3, RAB8A, SNRPD3, HIST1H2AE, H3F3B, H3F3C, SUPT5H, PPP4C, RPL29	198	242	19235	4.41575	0.05249	0.00767295	0.266385
GOTERM_BP_FAT	GO:0007049~cell cycle	22	11	0.000248746	STEAP3, TXNIP, ARL2, KIFC1, ERH, MKI67, TUBB2B, TUBB2A, CCNF, AURKA, CDC20, AURKB, SUGT1, PIN1, PSMB9, CHMP1B, PSMB1, PSMC3, CKS2, UBB, SUPT5H, DHCR24	158	776	13528	2.42738	0.235992	0.085818	0.396221
SP_PIR_KEYWORDS	cell cycle	15	7.5	0.000295942	STEAP3, TXNIP, ARL2, KIFC1, ERH, CHMP1B, MKI67, CCNF, CKS2, CDC20, PIM3, AURKA, AURKB, UBE2S, PIN1	198	461	19235	3.16095	0.0754391	0.00975664	0.387286
SP_PIR_KEYWORDS	nucleus	66	33	0.000329499	EIF6, HNRNPA1L2, HIST2H2AA3, KIFC1, ZMAT5, COPS6, SNRPD3, EDC4, TIMM50, RANGAP1, AURKB, APOBEC3F, CITED4, RBM8A, GRWD1, RPS3A, AEN, ZNF444, PPP4C, SUPT5H, PABPN1, ZBTB22, ATF7IP, EFTUD2, CCNF, CDK9, TMEM189, TRMT61A, CD3EAP, MED19, ADRM1, NLE1, CMIP, RUVBL2, UBB, LMNB2, HIST1H2AE, SOX4, EGLN2, STK17A, TTC5, CIC, PIN1, RBX1, ZNF703, PSMB1, SNF8, KDM3B, NTHL1, EMD, TRAF4, NPLOC4, TSEN54, CEBPB, MKI…	198	4283	19235	1.497	0.0836268	0.00965658	0.431112
KEGG_PATHWAY	hsa03010:Ribosome	8	4	0.000388851	RPS28, RPL18A, RPL41, RPS16, RPS3A, RPL36, FAU, RPL29	81	87	5085	5.77267	0.030635	0.030635	0.41262
GOTERM_CC_FAT	GO:0044445~cytosolic part	9	4.5	0.000404275	RPS28, RPL18A, RPL41, RPS16, RPS3A, RPL36, FAU, UBB, RPL29	150	152	12782	5.04553	0.0950505	0.00828847	0.522928
UP_SEQ_FEATURE	mutagenesis site	38	19	0.000471574	OTUD5, HIST2H2AA3, PTGES2, HELQ, HIST1H2AE, ADH5, EGLN2, RANGAP1, STK17A, AURKB, APOBEC3F, CKB, PIN1, RBX1, BAK1, RBM8A, AEN, CHST11, PPP4C, SUPT5H, NTHL1, EMD, ARL2, ATF7IP, PABPN1, UBE4B, CST3, CDK9, CDC20, LDLRAP1, PSMB9, MTMR14, CHMP1B, PSMC3, TMSB4X, UBB, UBE2S, RNF40	198	2045	19113	1.79372	0.233946	0.233946	0.68853
SP_PIR_KEYWORDS	cytoplasm	53	26.5	0.000879731	EIF6, HNRNPA1L2, KIFC1, PTGES2, COPS6, EDC4, AURKA, RANGAP1, AURKB, CITED4, APOBEC3F, CKB, DYNLL1, RBM8A, RPS3A, PDE4A, MSN, PPP4C, ARL2, PABPN1, CORO7, LDLRAP1, ADRM1, MTMR14, CHMP1B, CMIP, RUVBL2, TMSB4X, UBB, PPP1R12C, ADH5, EGLN2, TTC5, CAPZB, CDC37, RBX1, PSMB1, EIF3G, SNF8, TRAF4, TXNIP, ACTB, GDI1, NPLOC4, GABARAPL1, ACY1, AGBL5, UBE4B, GDPD5, TUBGCP2, PSMB9, DDX6, PSMC3	198	3332	19235	1.54525	0.20803	0.0230533	1.1472
SP_PIR_KEYWORDS	nucleotide-binding	32	16	0.00100704	TUFM, KIFC1, ABCF3, ABCF2, HELQ, TUBB2B, ASS1, TUBB2A, ATP6AP1, AURKA, AURKB, STK17A, VARS, CKB, GSS, ATAD3A, HSPA6, SAR1A, EHD2, ARL2, ACTB, RAB8A, MKI67, EFTUD2, SUCLG1, CDK9, PIM3, SARS2, DDX6, PSMC3, RUVBL2, UBE2S	198	1686	19235	1.84382	0.234327	0.0239806	1.31221
UP_SEQ_FEATURE	cross-link:Glycyl lysine isopeptide (Lys-Gly) (interchain with G-Cter in ubiquitin)	9	4.5	0.00108901	TXNIP, ARL2, ADRM1, HIST2H2AA3, SUCLG1, HIST1H2AE, UBB, UQCRQ, RPL29	198	199	19113	4.36569	0.459697	0.264947	1.58335
GOTERM_CC_FAT	GO:0022627~cytosolic small ribosomal subunit	5	2.5	0.00116967	RPS28, RPS16, RPS3A, FAU, UBB	150	40	12782	10.6517	0.251046	0.0219913	1.50606
GOTERM_CC_FAT	GO:0031981~nuclear lumen	31	15.5	0.00120825	EIF6, ZMAT5, LMNB2, SNRPD3, RPL36, TIMM50, APOBEC3F, RPS3A, GRWD1, RBM8A, AEN, MSN, KDM3B, SUPT5H, NTHL1, ACTB, ATF7IP, PABPN1, TSEN54, CEBPB, MKI67, CDK9, CDC20, POLR3D, MED19, CD3EAP, TCEB2, NLE1, RUVBL2, UBB, PBX2	150	1450	12782	1.8218	0.258158	0.0211041	1.55538
GOTERM_BP_FAT	GO:0051443~positive regulation of ubiquitin-protein ligase activity	6	3	0.00130265	PSMB1, PSMC3, CDC20, UBB, PSMB9, PIN1	158	70	13528	7.33888	0.755952	0.29714	2.0587
SP_PIR_KEYWORDS	citrullination	4	2	0.00141147	HIST2H2AA3, HIST1H2AE, H3F3B, H3F3C	198	22	19235	17.663	0.312232	0.0307105	1.8347
GOTERM_BP_FAT	GO:0051351~positive regulation of ligase activity	6	3	0.00157231	PSMB1, PSMC3, CDC20, UBB, PSMB9, PIN1	158	73	13528	7.03728	0.817787	0.288597	2.47986
SP_PIR_KEYWORDS	isopeptide bond	11	5.5	0.00171978	TXNIP, ARL2, ADRM1, HIST2H2AA3, CEBPB, SUCLG1, HIST1H2AE, RANGAP1, UBB, UQCRQ, RPL29	198	319	19235	3.34988	0.36627	0.0344787	2.23129
GOTERM_BP_FAT	GO:0051438~regulation of ubiquitin-protein ligase activity	6	3	0.0021099	PSMB1, PSMC3, CDC20, UBB, PSMB9, PIN1	158	78	13528	6.58617	0.898259	0.316745	3.31445
GOTERM_BP_FAT	GO:0051340~regulation of ligase activity	6	3	0.00249061	PSMB1, PSMC3, CDC20, UBB, PSMB9, PIN1	158	81	13528	6.34224	0.932673	0.31986	3.90142
GOTERM_BP_FAT	GO:0019941~modification-dependent protein catabolic process	16	8	0.0027804	OTUD5, NPLOC4, UFSP2, UBE4B, CDC20, TMEM189, SUGT1, RBX1, PSMB9, PSMB1, PSMC3, TCEB2, UBB, UBE2S, RNF40, AUP1	158	574	13528	2.38663	0.950836	0.313791	4.34599
GOTERM_BP_FAT	GO:0043632~modification-dependent macromolecule catabolic process	16	8	0.0027804	OTUD5, NPLOC4, UFSP2, UBE4B, CDC20, TMEM189, SUGT1, RBX1, PSMB9, PSMB1, PSMC3, TCEB2, UBB, UBE2S, RNF40, AUP1	158	574	13528	2.38663	0.950836	0.313791	4.34599
GOTERM_BP_FAT	GO:0007017~microtubule-based process	10	5	0.00278372	KIFC1, DYNLL1, TUBB2B, TUBB2A, CKS2, AURKA, KLC2, PPP4C, TUBGCP2, HAP1	158	253	13528	3.3842	0.951012	0.284756	4.35107
GOTERM_BP_FAT	GO:0031398~positive regulation of protein ubiquitination	6	3	0.00291892	PSMB1, PSMC3, CDC20, UBB, PSMB9, PIN1	158	84	13528	6.11573	0.957696	0.271151	4.55779
GOTERM_BP_FAT	GO:0000278~mitotic cell cycle	12	6	0.00393318	KIFC1, PSMB1, TUBB2B, TUBB2A, PSMC3, CCNF, CDC20, AURKA, UBB, AURKB, SUGT1, PSMB9	158	370	13528	2.77687	0.985935	0.321346	6.09541
GOTERM_BP_FAT	GO:0034622~cellular macromolecular complex assembly	11	5.5	0.00399094	EIF6, ARL2, ADRM1, HIST2H2AA3, NDUFS5, TUBB2B, TUBB2A, SNRPD3, HIST1H2AE, H3F3B, H3F3C	158	318	13528	2.96171	0.986791	0.302721	6.18227
GOTERM_CC_FAT	GO:0044429~mitochondrial part	16	8	0.00400462	TUFM, TXNIP, SHMT2, NDUFB10, ABCF2, ACADS, SUCLG1, MRPS11, MRPL9, MRPS21, TIMM50, UQCRQ, SARS2, BAK1, NDUFS5, COX6B1	150	595	12782	2.29145	0.628842	0.0639395	5.0699
GOTERM_BP_FAT	GO:0009057~macromolecule catabolic process	19	9.5	0.00414529	OTUD5, NPLOC4, UFSP2, UBE4B, CDC20, TMEM189, SUGT1, RBX1, PSMB9, PSMB1, RBM8A, PSMC3, TCEB2, UBB, UBE2S, NTHL1, RNF40, AUP1, DHCR24	158	781	13528	2.08295	0.98883	0.292299	6.41402
GOTERM_BP_FAT	GO:0051603~proteolysis involved in cellular protein catabolic process	16	8	0.0042043	OTUD5, NPLOC4, UFSP2, UBE4B, CDC20, TMEM189, SUGT1, RBX1, PSMB9, PSMB1, PSMC3, TCEB2, UBB, UBE2S, RNF40, AUP1	158	600	13528	2.28321	0.989524	0.277919	6.50249
GOTERM_BP_FAT	GO:0044257~cellular protein catabolic process	16	8	0.00440141	OTUD5, NPLOC4, UFSP2, UBE4B, CDC20, TMEM189, SUGT1, RBX1, PSMB9, PSMB1, PSMC3, TCEB2, UBB, UBE2S, RNF40, AUP1	158	603	13528	2.27185	0.991544	0.272535	6.79738
GOTERM_BP_FAT	GO:0044265~cellular macromolecule catabolic process	18	9	0.00447873	OTUD5, NPLOC4, UFSP2, UBE4B, CDC20, TMEM189, SUGT1, RBX1, PSMB9, PSMB1, RBM8A, PSMC3, TCEB2, UBB, UBE2S, NTHL1, RNF40, AUP1	158	725	13528	2.12574	0.992225	0.26181	6.91283
GOTERM_MF_FAT	GO:0000166~nucleotide binding	41	20.5	0.00472342	STEAP3, TUFM, HNRNPA1L2, KIFC1, ABCF3, ABCF2, HELQ, ASS1, TUBB2B, TUBB2A, ATP6AP1, ADH5, AURKA, AURKB, STK17A, VARS, CKB, TRIB1, GSS, ATAD3A, EIF3G, RBM8A, HSPA6, SAR1A, EHD2, DHCR24, PABPN1, ACTB, ARL2, RAB8A, MKI67, ACADS, EFTUD2, SUCLG1, CDK9, PIM3, SARS2, DDX6, PSMC3, RUVBL2, UBE2S	156	2245	12983	1.51991	0.812889	0.428039	6.28048
SP_PIR_KEYWORDS	mitochondrion	18	9	0.00537634	TUFM, MRPL2, SHMT2, NDUFB10, ACADS, SUCLG1, MRPS11, CHCHD2, MRPL9, MRPS21, TIMM50, UQCRQ, SARS2, TACO1, PRELID1, NDUFS5, COX6B1, MCCD1	198	832	19235	2.10173	0.76035	0.0970075	6.82343
GOTERM_BP_FAT	GO:0030163~protein catabolic process	16	8	0.00583255	OTUD5, NPLOC4, UFSP2, UBE4B, CDC20, TMEM189, SUGT1, RBX1, PSMB9, PSMB1, PSMC3, TCEB2, UBB, UBE2S, RNF40, AUP1	158	622	13528	2.20245	0.998217	0.310861	8.91259
GOTERM_MF_FAT	GO:0017076~purine nucleotide binding	36	18	0.00593443	STEAP3, TUFM, KIFC1, ABCF3, ABCF2, HELQ, TUBB2B, ASS1, TUBB2A, ATP6AP1, AURKA, AURKB, STK17A, VARS, CKB, TRIB1, GSS, ATAD3A, HSPA6, SAR1A, EHD2, DHCR24, ACTB, ARL2, RAB8A, MKI67, ACADS, EFTUD2, SUCLG1, CDK9, PIM3, SARS2, DDX6, PSMC3, RUVBL2, UBE2S	156	1918	12983	1.56208	0.878403	0.409486	7.83072
GOTERM_BP_FAT	GO:0022402~cell cycle process	15	7.5	0.00608687	KIFC1, MKI67, TUBB2B, TUBB2A, CCNF, AURKA, CDC20, AURKB, SUGT1, PSMB9, PSMB1, PSMC3, CKS2, UBB, DHCR24	158	565	13528	2.2731	0.998648	0.307195	9.28373
GOTERM_BP_FAT	GO:0031396~regulation of protein ubiquitination	6	3	0.00614205	PSMB1, PSMC3, CDC20, UBB, PSMB9, PIN1	158	100	13528	5.13722	0.998727	0.295912	9.36407
GOTERM_BP_FAT	GO:0010498~proteasomal protein catabolic process	6	3	0.00667119	NPLOC4, PSMB1, PSMC3, CDC20, UBB, PSMB9	158	102	13528	5.03649	0.999284	0.303802	10.1311
GOTERM_BP_FAT	GO:0043161~proteasomal ubiquitin-dependent protein catabolic process	6	3	0.00667119	NPLOC4, PSMB1, PSMC3, CDC20, UBB, PSMB9	158	102	13528	5.03649	0.999284	0.303802	10.1311
GOTERM_BP_FAT	GO:0031145~anaphase-promoting complex-dependent proteasomal ubiquitin-dependent protein catabolic process	5	2.5	0.00682859	PSMB1, PSMC3, CDC20, UBB, PSMB9	158	65	13528	6.58617	0.999397	0.297452	10.3581
GOTERM_BP_FAT	GO:0051436~negative regulation of ubiquitin-protein ligase activity during mitotic cell cycle	5	2.5	0.00682859	PSMB1, PSMC3, CDC20, UBB, PSMB9	158	65	13528	6.58617	0.999397	0.297452	10.3581
SP_PIR_KEYWORDS	P-loop	6	3	0.00687081	ARL2, TUFM, KIFC1, RAB8A, ABCF2, DDX6	198	116	19235	5.02482	0.839112	0.114678	8.64226
GOTERM_BP_FAT	GO:0051444~negative regulation of ubiquitin-protein ligase activity	5	2.5	0.00759432	PSMB1, PSMC3, CDC20, UBB, PSMB9	158	67	13528	6.38957	0.999738	0.312661	11.4547
GOTERM_BP_FAT	GO:0051352~negative regulation of ligase activity	5	2.5	0.00759432	PSMB1, PSMC3, CDC20, UBB, PSMB9	158	67	13528	6.38957	0.999738	0.312661	11.4547
SP_PIR_KEYWORDS	Spliceosome	6	3	0.00790232	HNRNPA1L2, ZMAT5, RBM8A, EFTUD2, PPIL1, SNRPD3	198	120	19235	4.85732	0.877841	0.123135	9.87845
GOTERM_BP_FAT	GO:0051437~positive regulation of ubiquitin-protein ligase activity during mitotic cell cycle	5	2.5	0.00799753	PSMB1, PSMC3, CDC20, UBB, PSMB9	158	68	13528	6.29561	0.999831	0.314594	12.027
GOTERM_BP_FAT	GO:0034621~cellular macromolecular complex subunit organization	11	5.5	0.00879973	EIF6, ARL2, ADRM1, HIST2H2AA3, NDUFS5, TUBB2B, TUBB2A, SNRPD3, HIST1H2AE, H3F3B, H3F3C	158	357	13528	2.63816	0.99993	0.328658	13.1555
SP_PIR_KEYWORDS	atp-binding	24	12	0.00921668	ACTB, KIFC1, ABCF3, HELQ, ABCF2, MKI67, ASS1, ATP6AP1, CDK9, AURKA, PIM3, STK17A, AURKB, VARS, SARS2, CKB, DDX6, GSS, ATAD3A, PSMC3, HSPA6, RUVBL2, UBE2S, EHD2	198	1326	19235	1.75831	0.914029	0.134405	11.4312
GOTERM_BP_FAT	GO:0051439~regulation of ubiquitin-protein ligase activity during mitotic cell cycle	5	2.5	0.00929078	PSMB1, PSMC3, CDC20, UBB, PSMB9	158	71	13528	6.0296	0.999959	0.332346	13.8395
UP_SEQ_FEATURE	transit peptide:Mitochondrion	12	6	0.00932986	MRPL2, TUFM, PRELID1, SHMT2, ACADS, SUCLG1, MRPS11, MCCD1, CHCHD2, MRPL9, TIMM50, SARS2	198	467	19113	2.48044	0.994989	0.828877	12.8294
GOTERM_CC_FAT	GO:0022625~cytosolic large ribosomal subunit	4	2	0.00971801	RPL18A, RPL41, RPL36, RPL29	150	38	12782	8.96982	0.910372	0.139942	11.8934
SP_PIR_KEYWORDS	microtubule	8	4	0.00987988	KIFC1, GABARAPL1, DYNLL1, TUBB2B, TUBB2A, KLC2, TUBGCP2, EMD	198	231	19235	3.36438	0.928007	0.135995	12.2053
SP_PIR_KEYWORDS	transit peptide	12	6	0.0101742	MRPL2, TUFM, PRELID1, SHMT2, ACADS, SUCLG1, MRPS11, MCCD1, CHCHD2, MRPL9, TIMM50, SARS2	198	476	19235	2.44907	0.933462	0.132926	12.5469
GOTERM_BP_FAT	GO:0031397~negative regulation of protein ubiquitination	5	2.5	0.0107132	PSMB1, PSMC3, CDC20, UBB, PSMB9	158	74	13528	5.78515	0.999991	0.361249	15.7927
GOTERM_BP_FAT	GO:0031400~negative regulation of protein modification process	6	3	0.0125161	BAK1, PSMB1, PSMC3, CDC20, UBB, PSMB9	158	119	13528	4.31699	0.999999	0.396334	18.2085
SP_PIR_KEYWORDS	nucleosome core	4	2	0.0130512	HIST2H2AA3, HIST1H2AE, H3F3B, H3F3C	198	48	19235	8.09554	0.969234	0.15976	15.8213
INTERPRO	IPR007125:Histone core	4	2	0.0137819	HIST2H2AA3, HIST1H2AE, H3F3B, H3F3C	187	45	16659	7.91872	0.996525	0.996525	17.6445
GOTERM_BP_FAT	GO:0000280~nuclear division	8	4	0.0143124	KIFC1, TUBB2B, TUBB2A, CCNF, CDC20, AURKA, AURKB, SUGT1	158	220	13528	3.11346	1	0.427115	20.5509
GOTERM_BP_FAT	GO:0007067~mitosis	8	4	0.0143124	KIFC1, TUBB2B, TUBB2A, CCNF, CDC20, AURKA, AURKB, SUGT1	158	220	13528	3.11346	1	0.427115	20.5509
GOTERM_BP_FAT	GO:0000279~M phase	10	5	0.01462	KIFC1, MKI67, TUBB2B, TUBB2A, CCNF, CKS2, CDC20, AURKA, AURKB, SUGT1	158	329	13528	2.60244	1	0.422764	20.9456
GOTERM_BP_FAT	GO:0000087~M phase of mitotic cell cycle	8	4	0.0156592	KIFC1, TUBB2B, TUBB2A, CCNF, CDC20, AURKA, AURKB, SUGT1	158	224	13528	3.05787	1	0.434046	22.2656
SP_PIR_KEYWORDS	ubl conjugation pathway	12	6	0.0160528	OTUD5, NPLOC4, UFSP2, UBE4B, TCEB2, CDC20, TMEM189, SUGT1, UBE2S, RNF40, RBX1, AUP1	198	509	19235	2.29029	0.986275	0.184713	19.1164
GOTERM_CC_FAT	GO:0005730~nucleolus	16	8	0.0161592	PABPN1, EIF6, TSEN54, MKI67, ZMAT5, SNRPD3, CDK9, RPL36, APOBEC3F, CD3EAP, RPS3A, GRWD1, AEN, NLE1, KDM3B, MSN	150	698	12782	1.95331	0.982117	0.210773	19.0417
GOTERM_MF_FAT	GO:0032553~ribonucleotide binding	33	16.5	0.0164184	TUFM, KIFC1, ABCF3, ABCF2, HELQ, TUBB2B, ASS1, TUBB2A, ATP6AP1, AURKA, AURKB, STK17A, VARS, CKB, TRIB1, GSS, ATAD3A, HSPA6, SAR1A, EHD2, ARL2, ACTB, RAB8A, MKI67, EFTUD2, SUCLG1, CDK9, PIM3, SARS2, DDX6, PSMC3, RUVBL2, UBE2S	156	1836	12983	1.49586	0.99715	0.690274	20.2917
GOTERM_MF_FAT	GO:0032555~purine ribonucleotide binding	33	16.5	0.0164184	TUFM, KIFC1, ABCF3, ABCF2, HELQ, TUBB2B, ASS1, TUBB2A, ATP6AP1, AURKA, AURKB, STK17A, VARS, CKB, TRIB1, GSS, ATAD3A, HSPA6, SAR1A, EHD2, ARL2, ACTB, RAB8A, MKI67, EFTUD2, SUCLG1, CDK9, PIM3, SARS2, DDX6, PSMC3, RUVBL2, UBE2S	156	1836	12983	1.49586	0.99715	0.690274	20.2917
SP_PIR_KEYWORDS	chromosomal protein	6	3	0.0168612	HIST2H2AA3, HIST1H2AE, H3F3B, AURKB, H3F3C, RNF40	198	145	19235	4.01985	0.988961	0.185216	19.9833
GOTERM_CC_FAT	GO:0005759~mitochondrial matrix	8	4	0.0170435	TUFM, SHMT2, ACADS, SUCLG1, MRPS11, MRPL9, MRPS21, SARS2	150	227	12782	3.00311	0.985679	0.210133	19.9802
GOTERM_CC_FAT	GO:0031980~mitochondrial lumen	8	4	0.0170435	TUFM, SHMT2, ACADS, SUCLG1, MRPS11, MRPL9, MRPS21, SARS2	150	227	12782	3.00311	0.985679	0.210133	19.9802
GOTERM_BP_FAT	GO:0048285~organelle fission	8	4	0.0174665	KIFC1, TUBB2B, TUBB2A, CCNF, CDC20, AURKA, AURKB, SUGT1	158	229	13528	2.9911	1	0.459373	24.5123
SP_PIR_KEYWORDS	mrna processing	8	4	0.0179082	PABPN1, HNRNPA1L2, TSEN54, ZMAT5, RBM8A, EFTUD2, PPIL1, SNRPD3	198	260	19235	2.98912	0.991677	0.187958	21.0933
GOTERM_BP_FAT	GO:0006368~RNA elongation from RNA polymerase II promoter	4	2	0.018116	ADRM1, TCEB2, CDK9, SUPT5H	158	48	13528	7.13502	1	0.461066	25.3046
GOTERM_BP_FAT	GO:0032269~negative regulation of cellular protein metabolic process	7	3.5	0.0185246	BAK1, EIF4EBP1, PSMB1, PSMC3, CDC20, UBB, PSMB9	158	180	13528	3.32968	1	0.45832	25.7992
GOTERM_CC_FAT	GO:0005681~spliceosome	6	3	0.0191147	HNRNPA1L2, ZMAT5, RBM8A, EFTUD2, PPIL1, SNRPD3	150	132	12782	3.87333	0.991494	0.221897	22.1391
SP_PIR_KEYWORDS	proteasome	4	2	0.0197126	ADRM1, PSMB1, PSMC3, PSMB9	198	56	19235	6.93903	0.994887	0.197348	22.9729
GOTERM_MF_FAT	GO:0016879~ligase activity, forming carbon-nitrogen bonds	8	4	0.020891	GSS, ASS1, UBE4B, TMEM189, UBE2S, RNF40, TTLL12, RBX1	156	231	12983	2.88223	0.999432	0.712239	25.1165
GOTERM_BP_FAT	GO:0006354~RNA elongation	4	2	0.0212719	ADRM1, TCEB2, CDK9, SUPT5H	158	51	13528	6.71531	1	0.495533	29.0453
GOTERM_BP_FAT	GO:0051248~negative regulation of protein metabolic process	7	3.5	0.0218839	BAK1, EIF4EBP1, PSMB1, PSMC3, CDC20, UBB, PSMB9	158	187	13528	3.20504	1	0.495425	29.75
INTERPRO	IPR004046:Glutathione S-transferase, C-terminal	3	1.5	0.0226533	PTGES2, VARS, GSTP1	187	21	16659	12.7265	0.999913	0.990669	27.4232
GOTERM_BP_FAT	GO:0006511~ubiquitin-dependent protein catabolic process	8	4	0.0228467	NPLOC4, PSMB1, PSMC3, UBE4B, CDC20, UBB, RNF40, PSMB9	158	242	13528	2.83042	1	0.500744	30.8455
GOTERM_MF_FAT	GO:0001883~purine nucleoside binding	29	14.5	0.0238101	STEAP3, KIFC1, ABCF3, ABCF2, HELQ, ASS1, ATP6AP1, AURKA, AURKB, STK17A, VARS, CKB, TRIB1, GSS, ATAD3A, HSPA6, EHD2, DHCR24, ACTB, MKI67, ACADS, SUCLG1, CDK9, PIM3, SARS2, DDX6, PSMC3, RUVBL2, UBE2S	156	1601	12983	1.5075	0.999803	0.704379	28.1179
SP_PIR_KEYWORDS	nucleotide binding	5	2.5	0.0243378	ARL2, TUFM, KIFC1, RAB8A, DDX6	198	107	19235	4.53955	0.99854	0.229852	27.6037
GOTERM_MF_FAT	GO:0001882~nucleoside binding	29	14.5	0.0257927	STEAP3, KIFC1, ABCF3, ABCF2, HELQ, ASS1, ATP6AP1, AURKA, AURKB, STK17A, VARS, CKB, TRIB1, GSS, ATAD3A, HSPA6, EHD2, DHCR24, ACTB, MKI67, ACADS, SUCLG1, CDK9, PIM3, SARS2, DDX6, PSMC3, RUVBL2, UBE2S	156	1612	12983	1.49721	0.999904	0.685353	30.0923
GOTERM_CC_FAT	GO:0015630~microtubule cytoskeleton	13	6.5	0.0268749	ARL2, KIFC1, GABARAPL1, TUBB2B, TUBB2A, AURKA, CDC20, KLC2, AURKB, TUBGCP2, DYNLL1, PPP4C, EMD	150	549	12782	2.0178	0.998804	0.285696	29.7588
GOTERM_CC_FAT	GO:0005654~nucleoplasm	18	9	0.0278614	ACTB, ATF7IP, PABPN1, SNRPD3, CDK9, CDC20, TIMM50, POLR3D, MED19, CD3EAP, RBM8A, AEN, TCEB2, RUVBL2, UBB, SUPT5H, PBX2, NTHL1	150	882	12782	1.73905	0.999069	0.282768	30.6766
GOTERM_CC_FAT	GO:0005819~spindle	6	3	0.0286988	KIFC1, CDC20, AURKA, AURKB, TUBGCP2, EMD	150	147	12782	3.4781	0.999248	0.278861	31.4469
GOTERM_CC_FAT	GO:0031967~organelle envelope	14	7	0.0291104	EIF6, TXNIP, SHMT2, NDUFB10, ABCF2, LMNB2, SUCLG1, RANGAP1, TIMM50, UQCRQ, BAK1, NDUFS5, COX6B1, EMD	150	620	12782	1.92417	0.999322	0.271859	31.8226
GOTERM_CC_FAT	GO:0031975~envelope	14	7	0.0297737	EIF6, TXNIP, SHMT2, NDUFB10, ABCF2, LMNB2, SUCLG1, RANGAP1, TIMM50, UQCRQ, BAK1, NDUFS5, COX6B1, EMD	150	622	12782	1.91798	0.999428	0.267342	32.4241
SP_PIR_KEYWORDS	GTP binding	4	2	0.031412	TUFM, RAB8A, TUBB2B, TUBB2A	198	67	19235	5.79979	0.999788	0.277687	34.1912
GOTERM_MF_FAT	GO:0030554~adenyl nucleotide binding	28	14	0.0334379	STEAP3, KIFC1, ABCF3, ABCF2, HELQ, ASS1, ATP6AP1, AURKA, AURKB, STK17A, VARS, CKB, TRIB1, GSS, ATAD3A, HSPA6, EHD2, DHCR24, ACTB, MKI67, ACADS, CDK9, PIM3, SARS2, DDX6, PSMC3, RUVBL2, UBE2S	156	1577	12983	1.47767	0.999994	0.737556	37.2449
GOTERM_MF_FAT	GO:0016881~acid-amino acid ligase activity	7	3.5	0.033516	GSS, UBE4B, TMEM189, UBE2S, RNF40, TTLL12, RBX1	156	201	12983	2.89836	0.999994	0.700849	37.3143
GOTERM_CC_FAT	GO:0034399~nuclear periphery	4	2	0.0341837	EIF6, CEBPB, LMNB2, RUVBL2	150	61	12782	5.58776	0.999814	0.290818	36.3002
GOTERM_CC_FAT	GO:0000502~proteasome complex	4	2	0.0341837	ADRM1, PSMB1, PSMC3, PSMB9	150	61	12782	5.58776	0.999814	0.290818	36.3002
SP_PIR_KEYWORDS	ATP	7	3.5	0.0348412	KIFC1, ABCF2, ASS1, HSPA6, CDK9, VARS, DDX6	198	236	19235	2.88146	0.999917	0.293943	37.1811
SP_PIR_KEYWORDS	Isomerase	5	2.5	0.0350188	PTGES2, PPIB, PPIL1, DSEL, PIN1	198	120	19235	4.04777	0.999921	0.286356	37.3325
PIR_SUPERFAMILY	PIRSF028901:membrane-bound O-acyltransferase, YOR175C type	2	1	0.0356727	MBOAT2, LPCAT3	90	3	7396	54.7852	0.977126	0.977126	33.3792
SP_PIR_KEYWORDS	respiratory chain	4	2	0.0363921	NDUFS5, NDUFB10, COX6B1, UQCRQ	198	71	19235	5.47304	0.999946	0.28734	38.4917
GOTERM_CC_FAT	GO:0000786~nucleosome	4	2	0.037095	HIST2H2AA3, HIST1H2AE, H3F3B, H3F3C	150	63	12782	5.41037	0.999912	0.301699	38.7455
GOTERM_CC_FAT	GO:0019866~organelle inner membrane	9	4.5	0.0388317	EIF6, NDUFS5, SHMT2, NDUFB10, LMNB2, SUCLG1, COX6B1, TIMM50, UQCRQ	150	329	12782	2.33106	0.999944	0.30394	40.1626
UP_SEQ_FEATURE	site:Binds AMP, but not cAMP	2	1	0.0405986	PDE4A, PDE4C	198	4	19113	48.2652	1	0.997132	45.5063
UP_SEQ_FEATURE	nucleotide phosphate-binding region:ATP	17	8.5	0.0407399	KIFC1, HELQ, MKI67, ASS1, CDK9, AURKA, PIM3, STK17A, AURKB, SARS2, DDX6, CKB, GSS, ATAD3A, PSMC3, RUVBL2, EHD2	198	962	19113	1.70584	1	0.990905	45.6238
GOTERM_BP_FAT	GO:0006730~one-carbon metabolic process	5	2.5	0.0413881	ATF7IP, SHMT2, BTG2, TRMT61A, KDM6B	158	112	13528	3.82233	1	0.70948	49.0612
GOTERM_BP_FAT	GO:0007018~microtubule-based movement	5	2.5	0.042534	KIFC1, TUBB2B, TUBB2A, KLC2, HAP1	158	113	13528	3.78851	1	0.709923	50.0242
GOTERM_BP_FAT	GO:0043086~negative regulation of catalytic activity	8	4	0.0427714	PSMB1, PSMC3, CST3, CDC20, UBB, DHCR24, TRIB1, PSMB9	158	277	13528	2.47279	1	0.702623	50.2216
GOTERM_CC_FAT	GO:0015934~large ribosomal subunit	4	2	0.0432859	RPL18A, RPL41, RPL36, RPL29	150	67	12782	5.08736	0.999982	0.323183	43.6601
INTERPRO	IPR017933:Glutathione S-transferase/chloride channel, C-terminal	3	1.5	0.0439653	PTGES2, VARS, GSTP1	187	30	16659	8.90856	1	0.99779	46.6837
UP_SEQ_FEATURE	domain:GST C-terminal	3	1.5	0.0452871	PTGES2, VARS, GSTP1	198	33	19113	8.77548	1	0.987274	49.2797
GOTERM_BP_FAT	GO:0065003~macromolecular complex assembly	14	7	0.0457446	EIF6, ARL2, ADRM1, HIST2H2AA3, NDUFS5, TUBB2B, TUBB2A, SNRPD3, HIST1H2AE, TCEB2, CDK9, H3F3B, H3F3C, TUBGCP2	158	665	13528	1.80253	1	0.718208	52.6325
PIR_SUPERFAMILY	PIRSF001214:multicatalytic endopeptidase complex chain C5	2	1	0.0472817	PSMB1, PSMB9	90	4	7396	41.0889	0.993509	0.919433	41.8169
KEGG_PATHWAY	hsa03040:Spliceosome	6	3	0.0474321	HNRNPA1L2, RBM8A, EFTUD2, PPIL1, SNRPD3, HSPA6	81	126	5085	2.98942	0.979504	0.856835	40.346
GOTERM_BP_FAT	GO:0008380~RNA splicing	8	4	0.0477899	PABPN1, HNRNPA1L2, TSEN54, ZMAT5, RBM8A, EFTUD2, PPIL1, SNRPD3	158	284	13528	2.41184	1	0.725366	54.2269
GOTERM_MF_FAT	GO:0003723~RNA binding	15	7.5	0.0481688	PABPN1, HNRNPA1L2, CDK9, TIMM50, LRRC47, APOBEC3F, RPL29, DDX6, RPL41, RPL18A, EIF3G, RPS16, RPS3A, RBM8A, FAU	156	718	12983	1.73867	1	0.795817	49.152
SMART	SM00428:H3	2	1	0.0507178	H3F3B, H3F3C	95	5	9079	38.2274	0.982748	0.982748	42.3377
GOTERM_BP_FAT	GO:0022403~cell cycle phase	10	5	0.0521824	KIFC1, MKI67, TUBB2B, TUBB2A, CCNF, CKS2, CDC20, AURKA, AURKB, SUGT1	158	414	13528	2.06812	1	0.748588	57.4828
SP_PIR_KEYWORDS	gtp-binding	8	4	0.0531824	ARL2, TUFM, RAB8A, TUBB2B, TUBB2A, EFTUD2, SUCLG1, SAR1A	198	329	19235	2.36222	0.999999	0.382904	51.1514
INTERPRO	IPR000164:Histone H3	2	1	0.0545993	H3F3B, H3F3C	187	5	16659	35.6342	1	0.996743	54.4058
SP_PIR_KEYWORDS	cell division	7	3.5	0.0547784	KIFC1, CHMP1B, CCNF, CKS2, CDC20, AURKB, UBE2S	198	264	19235	2.57585	1	0.382194	52.22
SP_PIR_KEYWORDS	Rotamase	3	1.5	0.0550042	PPIB, PPIL1, PIN1	198	37	19235	7.87674	1	0.374066	52.3694
INTERPRO	IPR019954:Ubiquitin conserved site	3	1.5	0.0550919	TCEB2, FAU, UBB	187	34	16659	7.86049	1	0.990187	54.737
GOTERM_CC_FAT	GO:0005740~mitochondrial envelope	10	5	0.0565699	TXNIP, BAK1, NDUFS5, SHMT2, ABCF2, NDUFB10, SUCLG1, COX6B1, TIMM50, UQCRQ	150	419	12782	2.03373	0.999999	0.391029	53.002
GOTERM_CC_FAT	GO:0005638~lamin filament	2	1	0.0569507	EIF6, LMNB2	150	5	12782	34.0853	0.999999	0.382932	53.2474
PIR_SUPERFAMILY	PIRSF002051:histone H3	2	1	0.0587524	H3F3B, H3F3C	90	5	7396	32.8711	0.998158	0.877425	49.1869
GOTERM_BP_FAT	GO:0031333~negative regulation of protein complex assembly	3	1.5	0.058953	EIF4EBP1, TMSB4X, CAPZB	158	34	13528	7.55473	1	0.783236	62.079
UP_SEQ_FEATURE	binding site:cAMP	2	1	0.0602786	PDE4A, PDE4C	198	6	19113	32.1768	1	0.993383	59.7748
SMART	SM00382:AAA	5	2.5	0.0620267	ABCF3, ATAD3A, ABCF2, PSMC3, RUVBL2	95	144	9079	3.31835	0.993226	0.917695	49.2032
GOTERM_BP_FAT	GO:0006508~proteolysis	19	9.5	0.063139	OTUD5, NPLOC4, UFSP2, ACY1, AGBL5, UBE4B, CDC20, TMEM189, SUGT1, RBX1, PSMB9, PSMB1, PSMC3, TCEB2, UBB, UBE2S, RNF40, AUP1, DHCR24	158	1054	13528	1.54344	1	0.798875	64.6832
SP_PIR_KEYWORDS	mrna splicing	6	3	0.0639408	HNRNPA1L2, ZMAT5, RBM8A, EFTUD2, PPIL1, SNRPD3	198	209	19235	2.78889	1	0.411757	57.948
GOTERM_BP_FAT	GO:0051247~positive regulation of protein metabolic process	7	3.5	0.0640094	PSMB1, PSMC3, EGLN2, CDC20, UBB, PSMB9, PIN1	158	243	13528	2.46643	1	0.796184	65.2032
GOTERM_BP_FAT	GO:0007585~respiratory gaseous exchange	3	1.5	0.0652266	CHST11, ADH5, TRAF4	158	36	13528	7.13502	1	0.795373	65.9184
GOTERM_BP_FAT	GO:0031401~positive regulation of protein modification process	6	3	0.0668288	PSMB1, PSMC3, CDC20, UBB, PSMB9, PIN1	158	187	13528	2.74717	1	0.796543	66.8387
GOTERM_BP_FAT	GO:0032446~protein modification by small protein conjugation	5	2.5	0.0676686	UBE4B, UBB, TMEM189, RNF40, RBX1	158	132	13528	3.24319	1	0.793907	67.3118
GOTERM_CC_FAT	GO:0005652~nuclear lamina	2	1	0.0679481	EIF6, LMNB2	150	6	12782	28.4044	1	0.42917	59.8439
GOTERM_BP_FAT	GO:0043933~macromolecular complex subunit organization	14	7	0.0694394	EIF6, ARL2, ADRM1, HIST2H2AA3, NDUFS5, TUBB2B, TUBB2A, SNRPD3, HIST1H2AE, TCEB2, CDK9, H3F3B, H3F3C, TUBGCP2	158	710	13528	1.68829	1	0.795905	68.2886
KEGG_PATHWAY	hsa05322:Systemic lupus erythematosus	5	2.5	0.0696569	HIST2H2AA3, SNRPD3, HIST1H2AE, H3F3B, H3F3C	81	99	5085	3.17059	0.996899	0.85418	53.587
PIR_SUPERFAMILY	PIRSF002034:ubiquitin	2	1	0.0700866	FAU, UBB	90	6	7396	27.3926	0.999478	0.848816	55.6241
SMART	SM00099:btg1	2	1	0.0702848	BTG2, TOB1	95	7	9079	27.3053	0.996601	0.849652	53.7393
GOTERM_MF_FAT	GO:0003755~peptidyl-prolyl cis-trans isomerase activity	3	1.5	0.0718866	PPIB, PPIL1, PIN1	156	37	12983	6.74792	1	0.889279	64.0137
GOTERM_MF_FAT	GO:0005524~ATP binding	25	12.5	0.0720732	KIFC1, ABCF3, ABCF2, HELQ, ASS1, ATP6AP1, AURKA, AURKB, STK17A, VARS, CKB, TRIB1, GSS, ATAD3A, HSPA6, EHD2, ACTB, MKI67, CDK9, PIM3, SARS2, DDX6, PSMC3, RUVBL2, UBE2S	156	1477	12983	1.40867	1	0.869571	64.1126
GOTERM_BP_FAT	GO:0006325~chromatin organization	9	4.5	0.0735371	HIST2H2AA3, HIST1H2AE, H3F3B, RUVBL2, H3F3C, KDM3B, SUPT5H, RNF40, KDM6B	158	378	13528	2.03858	1	0.808505	70.4452
GOTERM_BP_FAT	GO:0006334~nucleosome assembly	4	2	0.0740832	HIST2H2AA3, HIST1H2AE, H3F3B, H3F3C	158	84	13528	4.07715	1	0.804655	70.7219
INTERPRO	IPR002087:Anti-proliferative protein	2	1	0.0755994	BTG2, TOB1	187	7	16659	25.453	1	0.99523	66.7
GOTERM_MF_FAT	GO:0005525~GTP binding	9	4.5	0.0776383	ARL2, TUFM, RAB8A, TUBB2B, TUBB2A, EFTUD2, SUCLG1, SAR1A, EHD2	156	372	12983	2.01349	1	0.87043	66.9515
INTERPRO	IPR003593:ATPase, AAA+ type, core	5	2.5	0.0779601	ABCF3, ATAD3A, ABCF2, PSMC3, RUVBL2	187	144	16659	3.09325	1	0.991181	67.87
GOTERM_MF_FAT	GO:0016859~cis-trans isomerase activity	3	1.5	0.0787726	PPIB, PPIL1, PIN1	156	39	12983	6.40187	1	0.855769	67.504
GOTERM_CC_FAT	GO:0032993~protein-DNA complex	4	2	0.0790527	HIST2H2AA3, HIST1H2AE, H3F3B, H3F3C	150	86	12782	3.96341	1	0.470413	65.6238
GOTERM_BP_FAT	GO:0031497~chromatin assembly	4	2	0.0804141	HIST2H2AA3, HIST1H2AE, H3F3B, H3F3C	158	87	13528	3.93656	1	0.825241	73.7583
GOTERM_BP_FAT	GO:0006397~mRNA processing	8	4	0.0804288	PABPN1, HNRNPA1L2, TSEN54, ZMAT5, RBM8A, EFTUD2, PPIL1, SNRPD3	158	321	13528	2.13384	1	0.819453	73.765
GOTERM_MF_FAT	GO:0032559~adenyl ribonucleotide binding	25	12.5	0.0811996	KIFC1, ABCF3, ABCF2, HELQ, ASS1, ATP6AP1, AURKA, AURKB, STK17A, VARS, CKB, TRIB1, GSS, ATAD3A, HSPA6, EHD2, ACTB, MKI67, CDK9, PIM3, SARS2, DDX6, PSMC3, RUVBL2, UBE2S	156	1497	12983	1.38985	1	0.846443	68.6575
SMART	SM00213:UBQ	3	1.5	0.0818782	TCEB2, FAU, UBB	95	46	9079	6.23272	0.998723	0.810959	59.4896
GOTERM_BP_FAT	GO:0044087~regulation of cellular component biogenesis	5	2.5	0.083406	ATF7IP, EIF4EBP1, TMSB4X, UBB, CAPZB	158	142	13528	3.0148	1	0.825362	75.0881
GOTERM_BP_FAT	GO:0051129~negative regulation of cellular component organization	5	2.5	0.083406	PLXNA3, EIF4EBP1, CST3, TMSB4X, CAPZB	158	142	13528	3.0148	1	0.825362	75.0881
GOTERM_BP_FAT	GO:0042981~regulation of apoptosis	15	7.5	0.0840356	TXNIP, CEBPB, SOX4, PIM3, STK17A, BAK1, BTG2, DYNLL1, RPS3A, AEN, CHST11, UBB, GSTP1, TRAF4, DHCR24	158	804	13528	1.59739	1	0.822152	75.3598
UP_SEQ_FEATURE	nucleotide phosphate-binding region:GTP	7	3.5	0.0856751	ARL2, TUFM, RAB8A, TUBB2B, TUBB2A, EFTUD2, SAR1A	198	295	19113	2.29055	1	0.998211	73.0715
GOTERM_BP_FAT	GO:0043254~regulation of protein complex assembly	4	2	0.0869719	ATF7IP, EIF4EBP1, TMSB4X, CAPZB	158	90	13528	3.80534	1	0.827616	76.5906
GOTERM_MF_FAT	GO:0032561~guanyl ribonucleotide binding	9	4.5	0.0873062	ARL2, TUFM, RAB8A, TUBB2B, TUBB2A, EFTUD2, SUCLG1, SAR1A, EHD2	156	382	12983	1.96078	1	0.85078	71.394
GOTERM_MF_FAT	GO:0019001~guanyl nucleotide binding	9	4.5	0.0873062	ARL2, TUFM, RAB8A, TUBB2B, TUBB2A, EFTUD2, SUCLG1, SAR1A, EHD2	156	382	12983	1.96078	1	0.85078	71.394
SP_PIR_KEYWORDS	activator	10	5	0.087467	MED19, ATF7IP, CEBPB, RFX1, SOX4, RUVBL2, SUPT5H, CITED4, PBX2, TACO1	198	520	19235	1.8682	1	0.510026	69.8797
GOTERM_CC_FAT	GO:0000151~ubiquitin ligase complex	4	2	0.0878225	UBE4B, SUGT1, RNF40, RBX1	150	90	12782	3.78726	1	0.497426	69.6347
GOTERM_CC_FAT	GO:0044430~cytoskeletal part	17	8.5	0.0883175	MYL6, ARL2, EIF6, KIFC1, GABARAPL1, TUBB2B, LMNB2, TUBB2A, AURKA, CDC20, KLC2, AURKB, CAPZB, TUBGCP2, DYNLL1, PPP4C, EMD	150	952	12782	1.52167	1	0.489171	69.8477
GOTERM_BP_FAT	GO:0065004~protein-DNA complex assembly	4	2	0.0892069	HIST2H2AA3, HIST1H2AE, H3F3B, H3F3C	158	91	13528	3.76353	1	0.830298	77.4885
GOTERM_BP_FAT	GO:0043067~regulation of programmed cell death	15	7.5	0.0893452	TXNIP, CEBPB, SOX4, PIM3, STK17A, BAK1, BTG2, DYNLL1, RPS3A, AEN, CHST11, UBB, GSTP1, TRAF4, DHCR24	158	812	13528	1.58165	1	0.825523	77.543
KEGG_PATHWAY	hsa00680:Methane metabolism	2	1	0.0908025	SHMT2, ADH5	81	6	5085	20.9259	0.999507	0.851007	63.6513
GOTERM_BP_FAT	GO:0010941~regulation of cell death	15	7.5	0.0913902	TXNIP, CEBPB, SOX4, PIM3, STK17A, BAK1, BTG2, DYNLL1, RPS3A, AEN, CHST11, UBB, GSTP1, TRAF4, DHCR24	158	815	13528	1.57583	1	0.827542	78.3344
INTERPRO	IPR000626:Ubiquitin	3	1.5	0.0932961	TCEB2, FAU, UBB	187	46	16659	5.80993	1	0.993228	74.5893
GOTERM_BP_FAT	GO:0034728~nucleosome organization	4	2	0.0937486	HIST2H2AA3, HIST1H2AE, H3F3B, H3F3C	158	93	13528	3.68259	1	0.830546	79.2146
GOTERM_MF_FAT	GO:0031406~carboxylic acid binding	5	2.5	0.093803	GSS, ACADS, ADH5, EGLN2, PIN1	156	144	12983	2.88973	1	0.855884	74.0609
SP_PIR_KEYWORDS	ligase	7	3.5	0.0941873	GSS, ASS1, SUCLG1, VARS, UBE2S, RNF40, SARS2	198	305	19235	2.22959	1	0.527155	72.6616
GOTERM_BP_FAT	GO:0044092~negative regulation of molecular function	8	4	0.0943681	PSMB1, PSMC3, CST3, CDC20, UBB, DHCR24, TRIB1, PSMB9	158	334	13528	2.05078	1	0.827646	79.4402
GOTERM_MF_FAT	GO:0019899~enzyme binding	11	5.5	0.0960739	ACTB, FMNL3, NPC2, SNRPD3, UBE4B, CST3, AURKA, SUPT5H, RNF40, DHCR24, TRIB1	156	523	12983	1.75042	1	0.847704	74.9374
INTERPRO	IPR010625:CHCH	2	1	0.0961355	CHCHD2, CHCHD5	187	9	16659	19.7968	1	0.989767	75.6801
KEGG_PATHWAY	hsa05211:Renal cell carcinoma	4	2	0.0971144	TCEB2, EGLN2, RAPGEF1, RBX1	81	70	5085	3.5873	0.999718	0.80496	66.2461
BBID	84.Ubiquitination_Pathways_Cell_Cycle	2	1	0.0974892	CDC20, RBX1	4	12	358	14.9167	0.336548	0.336548	32.4051
UP_SEQ_FEATURE	domain:CHCH	2	1	0.0984417	CHCHD2, CHCHD5	198	10	19113	19.3061	1	0.998505	78.084
GOTERM_BP_FAT	GO:0048260~positive regulation of receptor-mediated endocytosis	2	1	0.0997584	ATP6AP1, LDLRAP1	158	9	13528	19.0267	1	0.840231	81.3085

## Sheet: GO_BP
Category	Term	Count	%	PValue	Genes	List Total	Pop Hits	Pop Total	Fold Enrichment	Bonferroni	Benjamini	FDR
GOTERM_BP_FAT	GO:0006412~translation	19	9.5	5.43747e-08	EIF6, TUFM, MRPL2, MRPS11, RPL36, MRPL9, MRPS21, LRRC47, VARS, SARS2, RPL29, RPS28, RPS16, RPL41, RPL18A, EIF3G, RPS3A, FAU, UBB	158	331	13528	4.91476	5.88317e-05	5.88317e-05	8.67732e-05
GOTERM_BP_FAT	GO:0006414~translational elongation	11	5.5	2.58424e-07	TUFM, RPS28, RPL18A, RPL41, RPS16, RPS3A, RPL36, FAU, UBB, VARS, RPL29	158	101	13528	9.32498	0.000279576	0.000139798	0.000412402
GOTERM_BP_FAT	GO:0007049~cell cycle	22	11	0.000248746	STEAP3, TXNIP, ARL2, KIFC1, ERH, MKI67, TUBB2B, TUBB2A, CCNF, AURKA, CDC20, AURKB, SUGT1, PIN1, PSMB9, CHMP1B, PSMB1, PSMC3, CKS2, UBB, SUPT5H, DHCR24	158	776	13528	2.42738	0.235992	0.085818	0.396221
GOTERM_BP_FAT	GO:0051443~positive regulation of ubiquitin-protein ligase activity	6	3	0.00130265	PSMB1, PSMC3, CDC20, UBB, PSMB9, PIN1	158	70	13528	7.33888	0.755952	0.29714	2.0587
GOTERM_BP_FAT	GO:0051351~positive regulation of ligase activity	6	3	0.00157231	PSMB1, PSMC3, CDC20, UBB, PSMB9, PIN1	158	73	13528	7.03728	0.817787	0.288597	2.47986
GOTERM_BP_FAT	GO:0051438~regulation of ubiquitin-protein ligase activity	6	3	0.0021099	PSMB1, PSMC3, CDC20, UBB, PSMB9, PIN1	158	78	13528	6.58617	0.898259	0.316745	3.31445
GOTERM_BP_FAT	GO:0051340~regulation of ligase activity	6	3	0.00249061	PSMB1, PSMC3, CDC20, UBB, PSMB9, PIN1	158	81	13528	6.34224	0.932673	0.31986	3.90142
GOTERM_BP_FAT	GO:0019941~modification-dependent protein catabolic process	16	8	0.0027804	OTUD5, NPLOC4, UFSP2, UBE4B, CDC20, TMEM189, SUGT1, RBX1, PSMB9, PSMB1, PSMC3, TCEB2, UBB, UBE2S, RNF40, AUP1	158	574	13528	2.38663	0.950836	0.313791	4.34599
GOTERM_BP_FAT	GO:0043632~modification-dependent macromolecule catabolic process	16	8	0.0027804	OTUD5, NPLOC4, UFSP2, UBE4B, CDC20, TMEM189, SUGT1, RBX1, PSMB9, PSMB1, PSMC3, TCEB2, UBB, UBE2S, RNF40, AUP1	158	574	13528	2.38663	0.950836	0.313791	4.34599
GOTERM_BP_FAT	GO:0007017~microtubule-based process	10	5	0.00278372	KIFC1, DYNLL1, TUBB2B, TUBB2A, CKS2, AURKA, KLC2, PPP4C, TUBGCP2, HAP1	158	253	13528	3.3842	0.951012	0.284756	4.35107
GOTERM_BP_FAT	GO:0031398~positive regulation of protein ubiquitination	6	3	0.00291892	PSMB1, PSMC3, CDC20, UBB, PSMB9, PIN1	158	84	13528	6.11573	0.957696	0.271151	4.55779
GOTERM_BP_FAT	GO:0000278~mitotic cell cycle	12	6	0.00393318	KIFC1, PSMB1, TUBB2B, TUBB2A, PSMC3, CCNF, CDC20, AURKA, UBB, AURKB, SUGT1, PSMB9	158	370	13528	2.77687	0.985935	0.321346	6.09541
GOTERM_BP_FAT	GO:0034622~cellular macromolecular complex assembly	11	5.5	0.00399094	EIF6, ARL2, ADRM1, HIST2H2AA3, NDUFS5, TUBB2B, TUBB2A, SNRPD3, HIST1H2AE, H3F3B, H3F3C	158	318	13528	2.96171	0.986791	0.302721	6.18227
GOTERM_BP_FAT	GO:0009057~macromolecule catabolic process	19	9.5	0.00414529	OTUD5, NPLOC4, UFSP2, UBE4B, CDC20, TMEM189, SUGT1, RBX1, PSMB9, PSMB1, RBM8A, PSMC3, TCEB2, UBB, UBE2S, NTHL1, RNF40, AUP1, DHCR24	158	781	13528	2.08295	0.98883	0.292299	6.41402
GOTERM_BP_FAT	GO:0051603~proteolysis involved in cellular protein catabolic process	16	8	0.0042043	OTUD5, NPLOC4, UFSP2, UBE4B, CDC20, TMEM189, SUGT1, RBX1, PSMB9, PSMB1, PSMC3, TCEB2, UBB, UBE2S, RNF40, AUP1	158	600	13528	2.28321	0.989524	0.277919	6.50249
GOTERM_BP_FAT	GO:0044257~cellular protein catabolic process	16	8	0.00440141	OTUD5, NPLOC4, UFSP2, UBE4B, CDC20, TMEM189, SUGT1, RBX1, PSMB9, PSMB1, PSMC3, TCEB2, UBB, UBE2S, RNF40, AUP1	158	603	13528	2.27185	0.991544	0.272535	6.79738
GOTERM_BP_FAT	GO:0044265~cellular macromolecule catabolic process	18	9	0.00447873	OTUD5, NPLOC4, UFSP2, UBE4B, CDC20, TMEM189, SUGT1, RBX1, PSMB9, PSMB1, RBM8A, PSMC3, TCEB2, UBB, UBE2S, NTHL1, RNF40, AUP1	158	725	13528	2.12574	0.992225	0.26181	6.91283
GOTERM_BP_FAT	GO:0030163~protein catabolic process	16	8	0.00583255	OTUD5, NPLOC4, UFSP2, UBE4B, CDC20, TMEM189, SUGT1, RBX1, PSMB9, PSMB1, PSMC3, TCEB2, UBB, UBE2S, RNF40, AUP1	158	622	13528	2.20245	0.998217	0.310861	8.91259
GOTERM_BP_FAT	GO:0022402~cell cycle process	15	7.5	0.00608687	KIFC1, MKI67, TUBB2B, TUBB2A, CCNF, AURKA, CDC20, AURKB, SUGT1, PSMB9, PSMB1, PSMC3, CKS2, UBB, DHCR24	158	565	13528	2.2731	0.998648	0.307195	9.28373
GOTERM_BP_FAT	GO:0031396~regulation of protein ubiquitination	6	3	0.00614205	PSMB1, PSMC3, CDC20, UBB, PSMB9, PIN1	158	100	13528	5.13722	0.998727	0.295912	9.36407
GOTERM_BP_FAT	GO:0010498~proteasomal protein catabolic process	6	3	0.00667119	NPLOC4, PSMB1, PSMC3, CDC20, UBB, PSMB9	158	102	13528	5.03649	0.999284	0.303802	10.1311
GOTERM_BP_FAT	GO:0043161~proteasomal ubiquitin-dependent protein catabolic process	6	3	0.00667119	NPLOC4, PSMB1, PSMC3, CDC20, UBB, PSMB9	158	102	13528	5.03649	0.999284	0.303802	10.1311
GOTERM_BP_FAT	GO:0031145~anaphase-promoting complex-dependent proteasomal ubiquitin-dependent protein catabolic process	5	2.5	0.00682859	PSMB1, PSMC3, CDC20, UBB, PSMB9	158	65	13528	6.58617	0.999397	0.297452	10.3581
GOTERM_BP_FAT	GO:0051436~negative regulation of ubiquitin-protein ligase activity during mitotic cell cycle	5	2.5	0.00682859	PSMB1, PSMC3, CDC20, UBB, PSMB9	158	65	13528	6.58617	0.999397	0.297452	10.3581
GOTERM_BP_FAT	GO:0051444~negative regulation of ubiquitin-protein ligase activity	5	2.5	0.00759432	PSMB1, PSMC3, CDC20, UBB, PSMB9	158	67	13528	6.38957	0.999738	0.312661	11.4547
GOTERM_BP_FAT	GO:0051352~negative regulation of ligase activity	5	2.5	0.00759432	PSMB1, PSMC3, CDC20, UBB, PSMB9	158	67	13528	6.38957	0.999738	0.312661	11.4547
GOTERM_BP_FAT	GO:0051437~positive regulation of ubiquitin-protein ligase activity during mitotic cell cycle	5	2.5	0.00799753	PSMB1, PSMC3, CDC20, UBB, PSMB9	158	68	13528	6.29561	0.999831	0.314594	12.027
GOTERM_BP_FAT	GO:0034621~cellular macromolecular complex subunit organization	11	5.5	0.00879973	EIF6, ARL2, ADRM1, HIST2H2AA3, NDUFS5, TUBB2B, TUBB2A, SNRPD3, HIST1H2AE, H3F3B, H3F3C	158	357	13528	2.63816	0.99993	0.328658	13.1555
GOTERM_BP_FAT	GO:0051439~regulation of ubiquitin-protein ligase activity during mitotic cell cycle	5	2.5	0.00929078	PSMB1, PSMC3, CDC20, UBB, PSMB9	158	71	13528	6.0296	0.999959	0.332346	13.8395
GOTERM_BP_FAT	GO:0031397~negative regulation of protein ubiquitination	5	2.5	0.0107132	PSMB1, PSMC3, CDC20, UBB, PSMB9	158	74	13528	5.78515	0.999991	0.361249	15.7927
GOTERM_BP_FAT	GO:0031400~negative regulation of protein modification process	6	3	0.0125161	BAK1, PSMB1, PSMC3, CDC20, UBB, PSMB9	158	119	13528	4.31699	0.999999	0.396334	18.2085
GOTERM_BP_FAT	GO:0000280~nuclear division	8	4	0.0143124	KIFC1, TUBB2B, TUBB2A, CCNF, CDC20, AURKA, AURKB, SUGT1	158	220	13528	3.11346	1	0.427115	20.5509
GOTERM_BP_FAT	GO:0007067~mitosis	8	4	0.0143124	KIFC1, TUBB2B, TUBB2A, CCNF, CDC20, AURKA, AURKB, SUGT1	158	220	13528	3.11346	1	0.427115	20.5509
GOTERM_BP_FAT	GO:0000279~M phase	10	5	0.01462	KIFC1, MKI67, TUBB2B, TUBB2A, CCNF, CKS2, CDC20, AURKA, AURKB, SUGT1	158	329	13528	2.60244	1	0.422764	20.9456
GOTERM_BP_FAT	GO:0000087~M phase of mitotic cell cycle	8	4	0.0156592	KIFC1, TUBB2B, TUBB2A, CCNF, CDC20, AURKA, AURKB, SUGT1	158	224	13528	3.05787	1	0.434046	22.2656
GOTERM_BP_FAT	GO:0048285~organelle fission	8	4	0.0174665	KIFC1, TUBB2B, TUBB2A, CCNF, CDC20, AURKA, AURKB, SUGT1	158	229	13528	2.9911	1	0.459373	24.5123
GOTERM_BP_FAT	GO:0006368~RNA elongation from RNA polymerase II promoter	4	2	0.018116	ADRM1, TCEB2, CDK9, SUPT5H	158	48	13528	7.13502	1	0.461066	25.3046
GOTERM_BP_FAT	GO:0032269~negative regulation of cellular protein metabolic process	7	3.5	0.0185246	BAK1, EIF4EBP1, PSMB1, PSMC3, CDC20, UBB, PSMB9	158	180	13528	3.32968	1	0.45832	25.7992
GOTERM_BP_FAT	GO:0006354~RNA elongation	4	2	0.0212719	ADRM1, TCEB2, CDK9, SUPT5H	158	51	13528	6.71531	1	0.495533	29.0453
GOTERM_BP_FAT	GO:0051248~negative regulation of protein metabolic process	7	3.5	0.0218839	BAK1, EIF4EBP1, PSMB1, PSMC3, CDC20, UBB, PSMB9	158	187	13528	3.20504	1	0.495425	29.75
GOTERM_BP_FAT	GO:0006511~ubiquitin-dependent protein catabolic process	8	4	0.0228467	NPLOC4, PSMB1, PSMC3, UBE4B, CDC20, UBB, RNF40, PSMB9	158	242	13528	2.83042	1	0.500744	30.8455
GOTERM_BP_FAT	GO:0006730~one-carbon metabolic process	5	2.5	0.0413881	ATF7IP, SHMT2, BTG2, TRMT61A, KDM6B	158	112	13528	3.82233	1	0.70948	49.0612
GOTERM_BP_FAT	GO:0007018~microtubule-based movement	5	2.5	0.042534	KIFC1, TUBB2B, TUBB2A, KLC2, HAP1	158	113	13528	3.78851	1	0.709923	50.0242
GOTERM_BP_FAT	GO:0043086~negative regulation of catalytic activity	8	4	0.0427714	PSMB1, PSMC3, CST3, CDC20, UBB, DHCR24, TRIB1, PSMB9	158	277	13528	2.47279	1	0.702623	50.2216
GOTERM_BP_FAT	GO:0065003~macromolecular complex assembly	14	7	0.0457446	EIF6, ARL2, ADRM1, HIST2H2AA3, NDUFS5, TUBB2B, TUBB2A, SNRPD3, HIST1H2AE, TCEB2, CDK9, H3F3B, H3F3C, TUBGCP2	158	665	13528	1.80253	1	0.718208	52.6325
GOTERM_BP_FAT	GO:0008380~RNA splicing	8	4	0.0477899	PABPN1, HNRNPA1L2, TSEN54, ZMAT5, RBM8A, EFTUD2, PPIL1, SNRPD3	158	284	13528	2.41184	1	0.725366	54.2269
GOTERM_BP_FAT	GO:0022403~cell cycle phase	10	5	0.0521824	KIFC1, MKI67, TUBB2B, TUBB2A, CCNF, CKS2, CDC20, AURKA, AURKB, SUGT1	158	414	13528	2.06812	1	0.748588	57.4828
GOTERM_BP_FAT	GO:0031333~negative regulation of protein complex assembly	3	1.5	0.058953	EIF4EBP1, TMSB4X, CAPZB	158	34	13528	7.55473	1	0.783236	62.079
GOTERM_BP_FAT	GO:0006508~proteolysis	19	9.5	0.063139	OTUD5, NPLOC4, UFSP2, ACY1, AGBL5, UBE4B, CDC20, TMEM189, SUGT1, RBX1, PSMB9, PSMB1, PSMC3, TCEB2, UBB, UBE2S, RNF40, AUP1, DHCR24	158	1054	13528	1.54344	1	0.798875	64.6832
GOTERM_BP_FAT	GO:0051247~positive regulation of protein metabolic process	7	3.5	0.0640094	PSMB1, PSMC3, EGLN2, CDC20, UBB, PSMB9, PIN1	158	243	13528	2.46643	1	0.796184	65.2032
GOTERM_BP_FAT	GO:0007585~respiratory gaseous exchange	3	1.5	0.0652266	CHST11, ADH5, TRAF4	158	36	13528	7.13502	1	0.795373	65.9184
GOTERM_BP_FAT	GO:0031401~positive regulation of protein modification process	6	3	0.0668288	PSMB1, PSMC3, CDC20, UBB, PSMB9, PIN1	158	187	13528	2.74717	1	0.796543	66.8387
GOTERM_BP_FAT	GO:0032446~protein modification by small protein conjugation	5	2.5	0.0676686	UBE4B, UBB, TMEM189, RNF40, RBX1	158	132	13528	3.24319	1	0.793907	67.3118
GOTERM_BP_FAT	GO:0043933~macromolecular complex subunit organization	14	7	0.0694394	EIF6, ARL2, ADRM1, HIST2H2AA3, NDUFS5, TUBB2B, TUBB2A, SNRPD3, HIST1H2AE, TCEB2, CDK9, H3F3B, H3F3C, TUBGCP2	158	710	13528	1.68829	1	0.795905	68.2886
GOTERM_BP_FAT	GO:0006325~chromatin organization	9	4.5	0.0735371	HIST2H2AA3, HIST1H2AE, H3F3B, RUVBL2, H3F3C, KDM3B, SUPT5H, RNF40, KDM6B	158	378	13528	2.03858	1	0.808505	70.4452
GOTERM_BP_FAT	GO:0006334~nucleosome assembly	4	2	0.0740832	HIST2H2AA3, HIST1H2AE, H3F3B, H3F3C	158	84	13528	4.07715	1	0.804655	70.7219
GOTERM_BP_FAT	GO:0031497~chromatin assembly	4	2	0.0804141	HIST2H2AA3, HIST1H2AE, H3F3B, H3F3C	158	87	13528	3.93656	1	0.825241	73.7583
GOTERM_BP_FAT	GO:0006397~mRNA processing	8	4	0.0804288	PABPN1, HNRNPA1L2, TSEN54, ZMAT5, RBM8A, EFTUD2, PPIL1, SNRPD3	158	321	13528	2.13384	1	0.819453	73.765
GOTERM_BP_FAT	GO:0044087~regulation of cellular component biogenesis	5	2.5	0.083406	ATF7IP, EIF4EBP1, TMSB4X, UBB, CAPZB	158	142	13528	3.0148	1	0.825362	75.0881
GOTERM_BP_FAT	GO:0051129~negative regulation of cellular component organization	5	2.5	0.083406	PLXNA3, EIF4EBP1, CST3, TMSB4X, CAPZB	158	142	13528	3.0148	1	0.825362	75.0881
GOTERM_BP_FAT	GO:0042981~regulation of apoptosis	15	7.5	0.0840356	TXNIP, CEBPB, SOX4, PIM3, STK17A, BAK1, BTG2, DYNLL1, RPS3A, AEN, CHST11, UBB, GSTP1, TRAF4, DHCR24	158	804	13528	1.59739	1	0.822152	75.3598
GOTERM_BP_FAT	GO:0043254~regulation of protein complex assembly	4	2	0.0869719	ATF7IP, EIF4EBP1, TMSB4X, CAPZB	158	90	13528	3.80534	1	0.827616	76.5906
GOTERM_BP_FAT	GO:0065004~protein-DNA complex assembly	4	2	0.0892069	HIST2H2AA3, HIST1H2AE, H3F3B, H3F3C	158	91	13528	3.76353	1	0.830298	77.4885
GOTERM_BP_FAT	GO:0043067~regulation of programmed cell death	15	7.5	0.0893452	TXNIP, CEBPB, SOX4, PIM3, STK17A, BAK1, BTG2, DYNLL1, RPS3A, AEN, CHST11, UBB, GSTP1, TRAF4, DHCR24	158	812	13528	1.58165	1	0.825523	77.543
GOTERM_BP_FAT	GO:0010941~regulation of cell death	15	7.5	0.0913902	TXNIP, CEBPB, SOX4, PIM3, STK17A, BAK1, BTG2, DYNLL1, RPS3A, AEN, CHST11, UBB, GSTP1, TRAF4, DHCR24	158	815	13528	1.57583	1	0.827542	78.3344
GOTERM_BP_FAT	GO:0034728~nucleosome organization	4	2	0.0937486	HIST2H2AA3, HIST1H2AE, H3F3B, H3F3C	158	93	13528	3.68259	1	0.830546	79.2146
GOTERM_BP_FAT	GO:0044092~negative regulation of molecular function	8	4	0.0943681	PSMB1, PSMC3, CST3, CDC20, UBB, DHCR24, TRIB1, PSMB9	158	334	13528	2.05078	1	0.827646	79.4402
GOTERM_BP_FAT	GO:0048260~positive regulation of receptor-mediated endocytosis	2	1	0.0997584	ATP6AP1, LDLRAP1	158	9	13528	19.0267	1	0.840231	81.3085
