# Supplementary material for: Comprehensive Expression Profiling and Functional Network Analysis of Porphyra-334, One Mycosporine-Like Amino Acid (MAA), in Human Keratinocyte Exposed with UV-radiation
Source: Mar Drugs. 2017 Jun 24;15(7):196. doi: 10.3390/md15070196 (PMC5532638; doi:10.3390/md15070196)
Supplement: Supplementary file 1 [file marinedrugs-15-00196-s001.zip › Supplementary Table S5.xlsx]

## Sheet: DAVID_211
Category	Term	Count	%	P value	Genes	List Total	Pop Hits	Pop Total	Fold Enrichment	Bonferroni	Benjamini	FDR
SP_PIR_KEYWORDS	nucleus	73	37.0558	2.73053e-06	PRPF4B, TAF1D, ZNF451, CCNT1, NAP1L1, INO80, SHOC2, ZKSCAN1, ESF1, NFATC2IP, KDM5B, LUC7L3, SS18L1, NFX1, ZNF281, ZNF594, METTL8, CTBP2, RREB1, DSN1, USP1, GTF2H3, PAPD5, HMGA2, PRPF4, ZNF549, JMY, ZNF500, DCAF7, MTF2, ZNF786, SERBP1, ZNF277, ESRP1, MNT, MDM2, ZNF431, CELF1, JMJD1C, LCOR, ZNF845, CLUAP1, MIDN, SETD1B, HOXA11, FHL2, ZNF655, IVNS1ABP, NUFIP2, VDR, CHD9, REL, MAP3K2, SQSTM1, UFM1, N…	197	4283	19235	1.66418	0.00061691	0.00061691	0.00349079
SP_PIR_KEYWORDS	phosphoprotein	106	53.8071	4.48955e-06	DLC1, RAB9A, PRPF4B, AP4E1, INO80, DSTYK, ESF1, RUNDC1, COL4A3BP, LRRC58, SLC2A1, PUM2, FNDC3A, LUC7L3, MTO1, RREB1, USP1, DCAF5, PGM3, MTF2, SERBP1, MNT, CELF1, CHORDC1, SEPT7, ZC3H4, CCDC93, SETD1B, VDR, NAA50, CEP170, DYRK2, AMD1, FGD6, PHACTR2, MYO1C, TAOK1, BFAR, FNBP1, NUP62, PDE7A, DYRK1A, YIPF5, ABL2, COPA, TAF1D, CCNT1, NAP1L1, ZKSCAN1, LATS2, NFATC2IP, KDM5B, SIK2, NFX1, ZNF281, SYNRG, …	197	7263	19235	1.425	0.00101413	0.000507192	0.00573951
GOTERM_BP_FAT	GO:0045449~regulation of transcription	51	25.8883	1.2134e-05	TAF1D, ZNF451, CCNT1, ZKSCAN1, NFATC2IP, ESF1, GATAD1, KDM5B, NFX1, SERTAD2, ZNF281, ZNF594, CTBP2, RREB1, GTF2H3, HMGA2, ZNF549, ZNF500, JMY, UBE2N, CIAO1, ACVR2B, ZNF786, MNT, ZNF277, MDM2, ZNF431, JMJD1C, LCOR, ZNF845, HOXA11, SETD1B, FHL2, ZNF655, VDR, CHD9, REL, SQSTM1, POU2F1, GATAD2A, MLXIP, LIMD1, ZNF563, CREB1, YWHAB, STAT3, ZNF526, NUP62, NFIC, ZNF256, ZBTB8A	147	2601	13528	1.80446	0.0140607	0.0140607	0.0195468
SP_PIR_KEYWORDS	transcription regulation	42	21.3198	1.3318e-05	ZNF845, SETD1B, HOXA11, TAF1D, CCNT1, ZNF451, FHL2, ZKSCAN1, ZNF655, ESF1, CHD9, VDR, REL, GATAD2A, POU2F1, MLXIP, LIMD1, KDM5B, SS18L1, SERTAD2, NFX1, ZNF281, ZNF563, ZNF594, CTBP2, RREB1, CREB1, GTF2H3, HMGA2, ZNF549, STAT3, ZNF526, ZNF500, ZNF786, MNT, ZNF277, ZNF431, JMJD1C, NFIC, LCOR, ZNF256, ZBTB8A	197	2026	19235	2.02412	0.00300535	0.00100279	0.017025
SP_PIR_KEYWORDS	Transcription	42	21.3198	2.23991e-05	ZNF845, SETD1B, HOXA11, TAF1D, CCNT1, ZNF451, FHL2, ZKSCAN1, ZNF655, ESF1, CHD9, VDR, REL, GATAD2A, POU2F1, MLXIP, LIMD1, KDM5B, SS18L1, SERTAD2, NFX1, ZNF281, ZNF563, ZNF594, CTBP2, RREB1, CREB1, GTF2H3, HMGA2, ZNF549, STAT3, ZNF526, ZNF500, ZNF786, MNT, ZNF277, ZNF431, JMJD1C, NFIC, LCOR, ZNF256, ZBTB8A	197	2071	19235	1.98014	0.00504945	0.00126476	0.0286323
GOTERM_BP_FAT	GO:0051252~regulation of RNA metabolic process	39	19.797	3.17049e-05	ZNF845, HOXA11, FHL2, ZKSCAN1, ZNF655, NFATC2IP, VDR, REL, SQSTM1, GATAD2A, POU2F1, LIMD1, GATAD1, KDM5B, SERTAD2, NFX1, ZNF281, ZNF563, CTBP2, RREB1, CREB1, GTF2H3, HMGA2, ZNF549, STAT3, ZNF500, JMY, CIAO1, ZNF786, SERBP1, MNT, ZNF277, ESRP1, MDM2, ZNF431, JMJD1C, NFIC, LCOR, ZNF256	147	1813	13528	1.97963	0.0363241	0.01833	0.0510662
GOTERM_CC_FAT	GO:0005654~nucleoplasm	22	11.1675	4.47991e-05	CTBP2, MYO1C, RREB1, USP1, CREB1, SETD1B, HOXA11, CCNT1, YWHAB, GTF2H3, IVNS1ABP, PRPF4, ESF1, CCND1, SQSTM1, DYRK1A, NUDT21, POU2F1, GATAD2A, MDM2, POLQ, LUC7L3	118	882	12782	2.70191	0.0105615	0.0105615	0.0576938
SP_PIR_KEYWORDS	zinc-finger	36	18.2741	5.65748e-05	ZNF845, ZC3H4, XIAP, ZNF451, FHL2, ZKSCAN1, ZNF655, ARIH1, VDR, SQSTM1, GATAD2A, GATAD1, KDM5B, FGD6, RNF145, NFX1, ZNF281, ZNF594, ZNF563, RREB1, MEX3A, GTF2H3, ZNF549, RNF170, ZNF526, ZNF500, BFAR, MTF2, ZNF786, ZNF277, MDM2, ZNF431, RNF19B, JMJD1C, ZNF256, ZBTB8A	197	1718	19235	2.046	0.0127049	0.00255398	0.0723039
SP_PIR_KEYWORDS	metal-binding	52	26.3959	8.67652e-05	PDP2, ZNF451, ZKSCAN1, LATS2, FAHD1, GATAD1, SIK2, KDM5B, NFX1, RNF145, ZNF281, ZNF594, RREB1, GTF2H3, ZNF549, RNF170, ZNF500, PGM3, ACVR2B, MTF2, RRM2, ZNF786, ZNF277, MDM2, CHSY1, YME1L1, ZNF431, JMJD1C, CHORDC1, ZNF845, ZC3H4, XIAP, FHL2, ZNF655, ARIH1, VDR, SQSTM1, MAP3K2, PLA2G12A, GATAD2A, LIMD1, FGD6, ZNF563, MEX3A, CYP20A1, ZNF526, BFAR, PDE7A, RNF19B, ABL2, ZNF256, ZBTB8A	197	2972	19235	1.70836	0.0194188	0.00326296	0.110868
GOTERM_BP_FAT	GO:0006355~regulation of transcription, DNA-dependent	37	18.7817	0.000106119	ZNF845, HOXA11, FHL2, ZKSCAN1, ZNF655, NFATC2IP, VDR, REL, SQSTM1, GATAD2A, POU2F1, LIMD1, GATAD1, KDM5B, SERTAD2, NFX1, ZNF281, ZNF563, CTBP2, RREB1, CREB1, GTF2H3, HMGA2, ZNF549, STAT3, ZNF500, JMY, CIAO1, ZNF786, MNT, ZNF277, MDM2, ZNF431, JMJD1C, NFIC, LCOR, ZNF256	147	1773	13528	1.92048	0.116485	0.0404418	0.170826
SP_PIR_KEYWORDS	ubl conjugation pathway	16	8.12183	0.000236765	XIAP, UBE4A, USP1, UBE2G2, SOCS5, FEM1B, UBE2N, ARIH1, DCAF5, DCAF7, UFM1, MDM2, USP35, RNF19B, PMEPA1, NFX1	197	509	19235	3.06922	0.0521084	0.00761587	0.30227
GOTERM_BP_FAT	GO:0006350~transcription	40	20.3046	0.000342268	ZNF845, SETD1B, HOXA11, TAF1D, CCNT1, ZNF451, FHL2, ZKSCAN1, ZNF655, IVNS1ABP, ESF1, CHD9, VDR, REL, GATAD2A, POU2F1, MLXIP, KDM5B, SERTAD2, NFX1, ZNF281, ZNF563, ZNF594, RREB1, CREB1, GTF2H3, HMGA2, ZNF549, STAT3, ZNF526, ZNF500, ZNF786, MNT, ZNF277, ZNF431, JMJD1C, NFIC, LCOR, ZNF256, ZBTB8A	147	2101	13528	1.75206	0.329342	0.0950484	0.54999
GOTERM_CC_FAT	GO:0016023~cytoplasmic membrane-bounded vesicle	15	7.61421	0.000491309	COPA, YWHAZ, SYNRG, AP4E1, SGK3, YWHAB, NAP1L1, YWHAE, FNBP1, TFRC, SLC2A1, MDM2, YIPF5, RAB11FIP1, FNDC3A	118	550	12782	2.95424	0.109942	0.0565713	0.631049
GOTERM_CC_FAT	GO:0031981~nuclear lumen	27	13.7056	0.000544041	MIDN, HOXA11, SETD1B, CCNT1, ZNF655, IVNS1ABP, ESF1, SQSTM1, NUDT21, GATAD2A, POU2F1, POLQ, LUC7L3, CTBP2, MYO1C, RREB1, USP1, CREB1, YWHAB, GTF2H3, PRPF4, STAT3, CCND1, CCT5, NUP62, DYRK1A, MDM2	118	1450	12782	2.01703	0.121002	0.0420799	0.69856
KEGG_PATHWAY	hsa04110:Cell cycle	7	3.5533	0.000642382	CCND1, YWHAZ, CCND2, YWHAB, MDM2, CDK6, YWHAE	45	125	5085	6.328	0.0519375	0.0519375	0.685763
GOTERM_CC_FAT	GO:0031988~membrane-bounded vesicle	15	7.61421	0.0006753	COPA, YWHAZ, SYNRG, AP4E1, SGK3, YWHAB, NAP1L1, YWHAE, FNBP1, TFRC, SLC2A1, MDM2, YIPF5, RAB11FIP1, FNDC3A	118	568	12782	2.86062	0.147942	0.0392346	0.866424
SP_PIR_KEYWORDS	zinc	39	19.797	0.000692855	ZNF845, ZC3H4, XIAP, ZNF451, FHL2, ZKSCAN1, ZNF655, ARIH1, VDR, SQSTM1, GATAD2A, LIMD1, GATAD1, KDM5B, FGD6, RNF145, NFX1, ZNF281, ZNF594, ZNF563, RREB1, MEX3A, GTF2H3, ZNF549, RNF170, ZNF526, ZNF500, BFAR, MTF2, ZNF786, ZNF277, MDM2, ZNF431, YME1L1, RNF19B, JMJD1C, CHORDC1, ZNF256, ZBTB8A	197	2189	19235	1.73958	0.144988	0.0193895	0.882173
SP_PIR_KEYWORDS	cytoplasm	53	26.9036	0.000775932	DLC1, COPA, MICA, SHOC2, DSTYK, LATS2, NFATC2IP, MKLN1, COL4A3BP, PUM2, SIK2, METTL8, SYNRG, PAPD5, JMY, DCAF7, SERBP1, RRM2, MDM2, CELF1, SEPT7, YWHAZ, XIAP, FHL2, FEM1B, IVNS1ABP, NUFIP2, ARIH1, CHD9, NAA50, SQSTM1, MAP3K2, UFM1, PLA2G12A, CEP170, AP3D1, MLXIP, LIMD1, DYRK2, TNRC6A, FGD6, MYO1C, TAOK1, MEX3A, YWHAB, LGALS8, YWHAE, STAT3, CCT5, FNBP1, NUP62, PDE7A, ABL2	197	3332	19235	1.55309	0.160903	0.0193033	0.987468
GOTERM_BP_FAT	GO:0006468~protein amino acid phosphorylation	18	9.13706	0.000852806	PRPF4B, ADORA2B, SGK3, TAOK1, CREB1, CCNT1, DSTYK, CDK6, LATS2, PRKX, ACVR2B, CCND1, MAP3K2, COL4A3BP, DYRK1A, DYRK2, ABL2, SIK2	147	667	13528	2.48349	0.630517	0.180557	1.3651
GOTERM_MF_FAT	GO:0004674~protein serine/threonine kinase activity	14	7.1066	0.00112392	ACVR2B, PRPF4B, NUP62, SGK3, TAOK1, MAP3K2, DYRK1A, DSTYK, GTF2H3, CDK6, DYRK2, SIK2, PRKX, LATS2	147	430	12983	2.87553	0.279092	0.279092	1.48462
GOTERM_CC_FAT	GO:0031982~vesicle	16	8.12183	0.00115362	COPA, YWHAZ, SYNRG, AP4E1, SGK3, YWHAB, NAP1L1, YWHAE, FNBP1, TFRC, SLC2A1, MDM2, GNAS, YIPF5, RAB11FIP1, FNDC3A	118	670	12782	2.58679	0.239338	0.0532434	1.47593
GOTERM_CC_FAT	GO:0070013~intracellular organelle lumen	30	15.2284	0.00115722	MIDN, PDP2, HOXA11, SETD1B, CCNT1, ZNF655, IVNS1ABP, ESF1, LONP2, SQSTM1, NUDT21, GATAD2A, POU2F1, POLQ, LUC7L3, CTBP2, MYO1C, RREB1, USP1, CREB1, YWHAB, GTF2H3, PRPF4, STAT3, DBT, CCND1, CCT5, NUP62, DYRK1A, MDM2	118	1779	12782	1.82668	0.239987	0.0447065	1.4805
SP_PIR_KEYWORDS	dna-binding	34	17.2589	0.00122747	ZNF845, HOXA11, TAF1D, ZNF451, INO80, ZKSCAN1, ZNF655, CHD9, VDR, REL, POU2F1, MLXIP, LUC7L3, NFX1, ZNF281, ZNF594, ZNF563, RREB1, CREB1, PAPD5, HMGA2, ZNF549, STAT3, ZNF526, ZNF500, MTF2, ZNF786, MNT, ZNF277, ZNF431, NFIC, LCOR, ZNF256, ZBTB8A	197	1868	19235	1.77717	0.242385	0.0273762	1.55796
GOTERM_MF_FAT	GO:0004672~protein kinase activity	17	8.62944	0.00128921	PRPF4B, SGK3, TAOK1, GTF2H3, DSTYK, CDK6, LATS2, PRKX, ACVR2B, CCND1, NUP62, MAP3K2, COL4A3BP, DYRK1A, DYRK2, ABL2, SIK2	147	606	12983	2.47762	0.312986	0.171137	1.70123
GOTERM_CC_FAT	GO:0048770~pigment granule	6	3.04569	0.00132755	YWHAZ, TFRC, SLC2A1, YWHAB, NAP1L1, YWHAE	118	89	12782	7.30261	0.270093	0.0439804	1.69669
GOTERM_CC_FAT	GO:0042470~melanosome	6	3.04569	0.00132755	YWHAZ, TFRC, SLC2A1, YWHAB, NAP1L1, YWHAE	118	89	12782	7.30261	0.270093	0.0439804	1.69669
GOTERM_CC_FAT	GO:0043233~organelle lumen	30	15.2284	0.00165513	MIDN, PDP2, HOXA11, SETD1B, CCNT1, ZNF655, IVNS1ABP, ESF1, LONP2, SQSTM1, NUDT21, GATAD2A, POU2F1, POLQ, LUC7L3, CTBP2, MYO1C, RREB1, USP1, CREB1, YWHAB, GTF2H3, PRPF4, STAT3, DBT, CCND1, CCT5, NUP62, DYRK1A, MDM2	118	1820	12782	1.78553	0.324694	0.0478891	2.11126
GOTERM_CC_FAT	GO:0044451~nucleoplasm part	14	7.1066	0.00167439	CTBP2, RREB1, SETD1B, HOXA11, CREB1, YWHAB, GTF2H3, IVNS1ABP, PRPF4, NUDT21, DYRK1A, POU2F1, GATAD2A, LUC7L3	118	555	12782	2.73245	0.327776	0.0431697	2.13558
GOTERM_BP_FAT	GO:0035304~regulation of protein amino acid dephosphorylation	3	1.52284	0.00168663	DLC1, YWHAB, YWHAE	147	6	13528	46.0136	0.860537	0.279872	2.6829
PIR_SUPERFAMILY	PIRSF000868:14-3-3	3	1.52284	0.00169795	YWHAZ, YWHAB, YWHAE	69	7	7396	45.9379	0.131554	0.131554	1.80336
PIR_SUPERFAMILY	PIRSF000868:14-3-3 protein	3	1.52284	0.00169795	YWHAZ, YWHAB, YWHAE	69	7	7396	45.9379	0.131554	0.131554	1.80336
SP_PIR_KEYWORDS	serine/threonine-protein kinase	12	6.09137	0.0018874	ACVR2B, PRPF4B, SGK3, TAOK1, MAP3K2, DYRK1A, DSTYK, CDK6, DYRK2, SIK2, LATS2, PRKX	197	381	19235	3.07526	0.347508	0.0380705	2.3863
INTERPRO	IPR008271:Serine/threonine protein kinase, active site	12	6.09137	0.0020523	ACVR2B, PRPF4B, SGK3, TAOK1, MAP3K2, DYRK1A, DSTYK, CDK6, DYRK2, SIK2, LATS2, PRKX	186	354	16659	3.03609	0.515776	0.515776	2.77413
UP_SEQ_FEATURE	site:Interaction with phosphoserine on interacting protein	3	1.52284	0.00210269	YWHAZ, YWHAB, YWHAE	196	7	19113	41.7923	0.745967	0.745967	3.09459
GOTERM_CC_FAT	GO:0031410~cytoplasmic vesicle	15	7.61421	0.00216571	COPA, YWHAZ, SYNRG, AP4E1, SGK3, YWHAB, NAP1L1, YWHAE, FNBP1, TFRC, SLC2A1, MDM2, YIPF5, RAB11FIP1, FNDC3A	118	642	12782	2.53089	0.4018	0.0500852	2.7542
GOTERM_CC_FAT	GO:0031974~membrane-enclosed lumen	30	15.2284	0.00223707	MIDN, PDP2, HOXA11, SETD1B, CCNT1, ZNF655, IVNS1ABP, ESF1, LONP2, SQSTM1, NUDT21, GATAD2A, POU2F1, POLQ, LUC7L3, CTBP2, MYO1C, RREB1, USP1, CREB1, YWHAB, GTF2H3, PRPF4, STAT3, DBT, CCND1, CCT5, NUP62, DYRK1A, MDM2	118	1856	12782	1.75089	0.411854	0.0471071	2.84375
INTERPRO	IPR017442:Serine/threonine protein kinase-related	12	6.09137	0.00228819	ACVR2B, PRPF4B, SGK3, TAOK1, MAP3K2, DYRK1A, DSTYK, CDK6, DYRK2, SIK2, LATS2, PRKX	186	359	16659	2.9938	0.554544	0.332575	3.08837
INTERPRO	IPR002290:Serine/threonine protein kinase	10	5.07614	0.00247375	PRPF4B, SGK3, TAOK1, MAP3K2, DYRK1A, CDK6, DYRK2, SIK2, LATS2, PRKX	186	259	16659	3.45809	0.582853	0.252812	3.33491
INTERPRO	IPR000308:14-3-3 protein	3	1.52284	0.00248315	YWHAZ, YWHAB, YWHAE	186	7	16659	38.3848	0.584237	0.197008	3.34738
GOTERM_CC_FAT	GO:0016607~nuclear speck	6	3.04569	0.00253051	RREB1, SETD1B, DYRK1A, GATAD2A, PRPF4, LUC7L3	118	103	12782	6.31002	0.451458	0.0488096	3.21119
KEGG_PATHWAY	hsa04115:p53 signaling pathway	5	2.53807	0.0026555	CCND1, CCND2, RRM2, MDM2, CDK6	45	68	5085	8.30882	0.198043	0.104479	2.80731
GOTERM_MF_FAT	GO:0030528~transcription regulator activity	30	15.2284	0.00266695	HOXA11, FHL2, ZKSCAN1, VDR, REL, GATAD2A, POU2F1, MLXIP, LIMD1, GATAD1, KDM5B, NFX1, SERTAD2, ZNF281, CTBP2, RREB1, CREB1, YWHAB, GTF2H3, STAT3, ZNF500, JMY, NUP62, RPL7L1, MNT, ZNF277, MDM2, NFIC, LCOR, ZNF256	147	1512	12983	1.75238	0.540271	0.228208	3.48969
GOTERM_BP_FAT	GO:0010629~negative regulation of gene expression	14	7.1066	0.00317381	ZNF281, CTBP2, YWHAB, STAT3, VDR, POU2F1, GATAD2A, MDM2, CELF1, LCOR, NFIC, TNRC6A, KDM5B, NFX1	147	504	13528	2.55631	0.975516	0.411372	4.9924
UP_SEQ_FEATURE	zinc finger region:C2H2-type 11	10	5.07614	0.00322913	ZNF845, ZNF563, ZNF594, RREB1, ZNF786, ZNF451, ZNF431, ZNF256, ZNF549, ZNF526	196	293	19113	3.32817	0.878223	0.651034	4.71541
UP_SEQ_FEATURE	domain:Protein kinase	13	6.59898	0.00324708	ACVR2B, PRPF4B, SGK3, TAOK1, MAP3K2, DYRK1A, DSTYK, CDK6, DYRK2, ABL2, SIK2, PRKX, LATS2	196	469	19113	2.70298	0.879643	0.506269	4.74104
SP_PIR_KEYWORDS	rna-binding	14	7.1066	0.0036932	RBM33, RBM41, RBM43, SETD1B, MEX3A, BICC1, DIS3L, NUFIP2, SERBP1, NUDT21, ESRP1, CELF1, PUM2, TNRC6A	197	540	19235	2.5314	0.566649	0.0673115	4.62017
SMART	SM00101:14_3_3	3	1.52284	0.00383396	YWHAZ, YWHAB, YWHAE	127	7	9079	30.6378	0.311065	0.311065	4.15056
UP_SEQ_FEATURE	binding site:ATP	14	7.1066	0.0038476	ACVR2B, PRPF4B, SGK3, TAOK1, MAP3K2, DYRK1A, DSTYK, CDK6, DYRK2, GK5, ABL2, SIK2, PRKX, LATS2	196	542	19113	2.51885	0.918701	0.466024	5.59453
GOTERM_CC_FAT	GO:0000307~cyclin-dependent protein kinase holoenzyme complex	3	1.52284	0.00432903	CCND1, CCND2, CDK6	118	11	12782	29.5424	0.642352	0.0760458	5.43536
UP_SEQ_FEATURE	zinc finger region:C2H2-type 12	9	4.56853	0.00443398	ZNF845, ZNF563, ZNF594, RREB1, ZNF786, ZNF431, ZNF256, ZNF549, ZNF526	196	252	19113	3.48269	0.944587	0.43931	6.42104
GOTERM_CC_FAT	GO:0016604~nuclear body	7	3.5533	0.00443868	RREB1, SETD1B, DYRK1A, NUDT21, GATAD2A, PRPF4, LUC7L3	118	168	12782	4.51342	0.651567	0.072542	5.56943
UP_SEQ_FEATURE	nucleotide phosphate-binding region:ATP	20	10.1523	0.00455554	PRPF4B, MYO1C, SGK3, TAOK1, DSTYK, INO80, CDK6, LATS2, PRKX, NUBPL, CHD9, ACVR2B, LONP2, MAP3K2, DYRK1A, YME1L1, DYRK2, GK5, ABL2, SIK2	196	962	19113	2.02735	0.948821	0.390676	6.59153
UP_SEQ_FEATURE	zinc finger region:C2H2-type 13	8	4.06091	0.0046406	ZNF845, ZNF594, RREB1, ZNF786, ZNF431, ZNF256, ZNF549, ZNF526	196	201	19113	3.88121	0.951591	0.351167	6.71066
INTERPRO	IPR017441:Protein kinase, ATP binding site	13	6.59898	0.00494639	ACVR2B, PRPF4B, SGK3, TAOK1, MAP3K2, DYRK1A, DSTYK, CDK6, DYRK2, ABL2, SIK2, PRKX, LATS2	186	455	16659	2.55899	0.826297	0.295369	6.56504
GOTERM_MF_FAT	GO:0046914~transition metal ion binding	46	23.3503	0.00497473	ZNF845, ZC3H4, ENOX2, PDP2, XIAP, ZNF451, FHL2, ZKSCAN1, ZNF655, ARIH1, VDR, SQSTM1, GATAD2A, LIMD1, DYRK2, GATAD1, FGD6, KDM5B, RNF145, NFX1, ZNF281, ZNF563, ZNF594, RREB1, MEX3A, GTF2H3, CYP20A1, ZNF549, RNF170, ZNF526, ZNF500, BFAR, ACVR2B, MTF2, RRM2, ZNF786, ZNF277, MDM2, ZNF431, YME1L1, RNF19B, JMJD1C, CHORDC1, ABL2, ZNF256, ZBTB8A	147	2785	12983	1.45878	0.765725	0.304285	6.41815
GOTERM_BP_FAT	GO:0045892~negative regulation of transcription, DNA-dependent	11	5.58376	0.00525413	ZNF281, VDR, CTBP2, GATAD2A, POU2F1, MDM2, NFIC, LCOR, KDM5B, STAT3, NFX1	147	356	13528	2.84354	0.997862	0.536277	8.13686
GOTERM_MF_FAT	GO:0003677~DNA binding	40	20.3046	0.00535354	ZNF845, HOXA11, TAF1D, CCNT1, ZNF451, INO80, ZKSCAN1, ZNF655, CHD9, VDR, REL, GATAD2A, POU2F1, MLXIP, POLQ, GATAD1, KDM5B, LUC7L3, NFX1, ZNF281, ZNF563, ZNF594, RREB1, CREB1, GTF2H3, PAPD5, HMGA2, ZNF549, STAT3, ZNF526, ZNF500, MTF2, ZNF786, MNT, ZNF277, ZNF431, NFIC, LCOR, ZNF256, ZBTB8A	147	2331	12983	1.51557	0.790298	0.268321	6.89092
GOTERM_BP_FAT	GO:0016310~phosphorylation	18	9.13706	0.00568639	PRPF4B, ADORA2B, SGK3, TAOK1, CREB1, CCNT1, DSTYK, CDK6, LATS2, PRKX, ACVR2B, CCND1, MAP3K2, COL4A3BP, DYRK1A, DYRK2, ABL2, SIK2	147	800	13528	2.07061	0.998712	0.522618	8.77785
GOTERM_BP_FAT	GO:0051325~interphase	6	3.04569	0.00579149	CCND1, CCND2, MDM2, CDK6, ZNF655, LATS2	147	106	13528	5.20909	0.998862	0.492283	8.93307
SP_PIR_KEYWORDS	cell division	9	4.56853	0.00581007	CCND1, CCND2, DSN1, CCNT1, CDK6, PAPD5, HMGA2, SEPT7, LATS2	197	264	19235	3.32862	0.732037	0.0963385	7.17884
GOTERM_BP_FAT	GO:0051253~negative regulation of RNA metabolic process	11	5.58376	0.00589338	ZNF281, VDR, CTBP2, GATAD2A, POU2F1, MDM2, NFIC, LCOR, KDM5B, STAT3, NFX1	147	362	13528	2.79641	0.99899	0.465853	9.08332
GOTERM_MF_FAT	GO:0019899~enzyme binding	14	7.1066	0.00607612	TAOK1, YWHAB, SHOC2, YWHAE, GCLM, STAT3, CCND1, LONP2, CCND2, SQSTM1, NUDT21, SLC2A1, MDM2, FGD6	147	523	12983	2.3642	0.83027	0.255908	7.7866
INTERPRO	IPR000719:Protein kinase, core	13	6.59898	0.00700481	ACVR2B, PRPF4B, SGK3, TAOK1, MAP3K2, DYRK1A, DSTYK, CDK6, DYRK2, ABL2, SIK2, PRKX, LATS2	186	476	16659	2.44609	0.916374	0.338712	9.17743
GOTERM_BP_FAT	GO:0030163~protein catabolic process	15	7.61421	0.00735092	XIAP, UBE4A, USP1, UBE2G2, SOCS5, FEM1B, UBE2N, ARIH1, UFM1, SQSTM1, MDM2, YME1L1, USP35, RNF19B, NFX1	147	622	13528	2.21931	0.999818	0.512038	11.2072
UP_SEQ_FEATURE	zinc finger region:C2H2-type 10	10	5.07614	0.0074688	ZNF845, ZNF563, ZNF594, RREB1, ZNF786, ZNF451, ZNF431, ZNF256, ZNF549, ZNF526	196	334	19113	2.91962	0.992406	0.456679	10.5918
UP_SEQ_FEATURE	domain:RRM	6	3.04569	0.00751427	RBM33, ENOX2, RBM41, RBM43, SETD1B, TNRC6A	196	119	19113	4.91674	0.992629	0.420497	10.653
UP_SEQ_FEATURE	active site:Proton acceptor	15	7.61421	0.00773831	PRPF4B, SGK3, TAOK1, DSTYK, CDK6, LATS2, PRKX, ACVR2B, RDH10, MAP3K2, DYRK1A, KDSR, DYRK2, SIK2, ABL2	196	658	19113	2.22299	0.993637	0.396931	10.9537
GOTERM_MF_FAT	GO:0008270~zinc ion binding	39	19.797	0.00806338	ZNF845, ZC3H4, XIAP, ZNF451, FHL2, ZKSCAN1, ZNF655, ARIH1, VDR, SQSTM1, GATAD2A, LIMD1, GATAD1, KDM5B, FGD6, RNF145, NFX1, ZNF281, ZNF594, ZNF563, RREB1, MEX3A, GTF2H3, ZNF549, RNF170, ZNF526, ZNF500, BFAR, MTF2, ZNF786, ZNF277, MDM2, ZNF431, YME1L1, RNF19B, JMJD1C, CHORDC1, ZNF256, ZBTB8A	147	2311	12983	1.49047	0.905197	0.285781	10.209
UP_SEQ_FEATURE	splice variant	94	47.7157	0.00817057	DLC1, COPA, ENOX2, ZNF451, TNFSF15, DSTYK, SHOC2, CCDC142, FAHD1, NFATC2IP, RUNDC1, MKLN1, KLHL28, COL4A3BP, PUM2, FNDC3A, KDM5B, SS18L1, MTO1, LUC7L3, NFX1, RNF145, MRI1, METTL8, SYNRG, CTBP2, RBM41, RREB1, AVL9, DSN1, PAPD5, DIS3L, ERGIC1, PRPF4, ZNF549, RNF170, JMY, DCAF5, MTF2, SERBP1, SLC35E1, BTG3, TMEM170A, ESRP1, MDM2, GNAS, YME1L1, CELF1, JMJD1C, LCOR, CHORDC1, RAB11FIP1, SEPT7, PMEPA1, …	196	7458	19113	1.22907	0.995208	0.384632	11.5313
GOTERM_BP_FAT	GO:0006796~phosphate metabolic process	20	10.1523	0.00849345	PDP2, PRPF4B, ADORA2B, SGK3, TAOK1, CREB1, CCNT1, DSTYK, CDK6, LATS2, PRKX, ACVR2B, CCND1, MAP3K2, COL4A3BP, DYRK1A, GK5, DYRK2, ABL2, SIK2	147	973	13528	1.89162	0.999952	0.534995	12.8395
GOTERM_BP_FAT	GO:0006793~phosphorus metabolic process	20	10.1523	0.00849345	PDP2, PRPF4B, ADORA2B, SGK3, TAOK1, CREB1, CCNT1, DSTYK, CDK6, LATS2, PRKX, ACVR2B, CCND1, MAP3K2, COL4A3BP, DYRK1A, GK5, DYRK2, ABL2, SIK2	147	973	13528	1.89162	0.999952	0.534995	12.8395
SP_PIR_KEYWORDS	atp-binding	24	12.1827	0.00868965	PRPF4B, MYO1C, SGK3, TAOK1, UBE2G2, INO80, DSTYK, CDK6, LATS2, PRKX, UBE2N, NUBPL, CHD9, ACVR2B, CCT5, LONP2, MAP3K2, DYRK1A, YME1L1, DYRK2, GK5, POLQ, ABL2, SIK2	197	1326	19235	1.76723	0.860883	0.131414	10.5579
SP_PIR_KEYWORDS	alternative splicing	94	47.7157	0.0090035	DLC1, COPA, MICA, ENOX2, ZNF451, TNFSF15, DSTYK, SHOC2, CCDC142, FAHD1, NFATC2IP, RUNDC1, MKLN1, KLHL28, COL4A3BP, PUM2, KDM5B, SS18L1, MTO1, LUC7L3, NFX1, RNF145, MRI1, METTL8, SYNRG, CTBP2, RBM41, RREB1, AVL9, DSN1, PAPD5, DIS3L, ERGIC1, PRPF4, ZNF549, RNF170, JMY, DCAF5, ACVR2B, MTF2, SERBP1, SLC35E1, BTG3, TMEM170A, ESRP1, MDM2, GNAS, YME1L1, CELF1, JMJD1C, LCOR, CHORDC1, RAB11FIP1, SEPT7, PM…	197	7488	19235	1.22571	0.870491	0.127391	10.9192
GOTERM_BP_FAT	GO:0043632~modification-dependent macromolecule catabolic process	14	7.1066	0.00922864	UBE2N, ARIH1, UBE4A, XIAP, SQSTM1, UFM1, USP1, UBE2G2, MDM2, USP35, SOCS5, RNF19B, FEM1B, NFX1	147	574	13528	2.24457	0.99998	0.538302	13.8749
GOTERM_BP_FAT	GO:0019941~modification-dependent protein catabolic process	14	7.1066	0.00922864	UBE2N, ARIH1, UBE4A, XIAP, SQSTM1, UFM1, USP1, UBE2G2, MDM2, USP35, SOCS5, RNF19B, FEM1B, NFX1	147	574	13528	2.24457	0.99998	0.538302	13.8749
UP_SEQ_FEATURE	mutagenesis site	33	16.7513	0.0093209	YWHAZ, ENOX2, XIAP, CCNT1, DSTYK, IVNS1ABP, FEM1B, LATS2, ARIH1, VDR, UFM1, SQSTM1, COL4A3BP, NUDT21, AMD1, TNRC6A, KDM5B, SIK2, NFX1, SGK3, USP1, UBE2N, PGM3, FNBP1, CCND1, TFRC, RRM2, MDM2, GNAS, CELF1, LCOR, RAB11FIP1, PMEPA1	196	2045	19113	1.5736	0.997749	0.39832	13.0513
INTERPRO	IPR000504:RNA recognition motif, RNP-1	8	4.06091	0.00935355	RBM33, ENOX2, RBM41, RBM43, SETD1B, ESRP1, CELF1, TNRC6A	186	211	16659	3.39581	0.963751	0.377434	12.0755
UP_SEQ_FEATURE	zinc finger region:C2H2-type 5	13	6.59898	0.00938742	ZNF845, ZNF563, ZNF594, RREB1, ZNF786, ZNF451, ZKSCAN1, ZNF431, ZNF655, ZNF256, ZNF549, ZNF500, ZNF526	196	538	19113	2.35632	0.997845	0.376442	13.1384
GOTERM_MF_FAT	GO:0016564~transcription repressor activity	10	5.07614	0.00942407	ZNF281, CTBP2, YWHAB, GATAD2A, POU2F1, MNT, MDM2, LIMD1, ZNF256, KDM5B	147	316	12983	2.79493	0.936417	0.291373	11.8335
UP_SEQ_FEATURE	zinc finger region:C2H2-type 2	14	7.1066	0.00974349	ZNF281, ZNF845, ZNF594, RREB1, ZNF451, ZKSCAN1, ZNF655, ZNF500, ZNF526, ZNF786, ZNF277, ZNF431, ZNF256, ZBTB8A	196	608	19113	2.24542	0.998295	0.365739	13.6035
UP_SEQ_FEATURE	compositionally biased region:Poly-Ser	12	6.09137	0.0097488	DLC1, CHD9, PDE7A, HOXA11, BTBD3, BTG3, DYRK1A, MEX3A, KCTD21, MDM2, FGD6, ABL2	196	475	19113	2.46354	0.998301	0.346344	13.6105
SMART	SM00220:S_TKc	10	5.07614	0.00985387	PRPF4B, SGK3, TAOK1, MAP3K2, DYRK1A, CDK6, DYRK2, SIK2, LATS2, PRKX	127	259	9079	2.76016	0.617324	0.381392	10.3523
GOTERM_BP_FAT	GO:0043085~positive regulation of catalytic activity	13	6.59898	0.0106395	DLC1, ADORA2B, TNFSF15, YWHAB, GCLM, UBE2N, VDR, ACVR2B, CCND1, MAP3K2, CCND2, GNAS, ABL2	147	520	13528	2.30068	0.999996	0.564904	15.8296
GOTERM_BP_FAT	GO:0044093~positive regulation of molecular function	14	7.1066	0.0108495	DLC1, ADORA2B, YWHAB, TNFSF15, GCLM, JMY, UBE2N, VDR, ACVR2B, CCND1, MAP3K2, CCND2, GNAS, ABL2	147	586	13528	2.1986	0.999997	0.548717	16.117
GOTERM_BP_FAT	GO:0016481~negative regulation of transcription	12	6.09137	0.0109841	ZNF281, VDR, CTBP2, YWHAB, GATAD2A, POU2F1, MDM2, NFIC, LCOR, KDM5B, STAT3, NFX1	147	459	13528	2.40594	0.999997	0.531489	16.3006
INTERPRO	IPR013089:Kelch related	5	2.53807	0.0115879	KBTBD6, KLHL28, BTBD3, IVNS1ABP, ZBTB8A	186	79	16659	5.66864	0.983664	0.402081	14.7526
UP_SEQ_FEATURE	zinc finger region:C2H2-type 6	12	6.09137	0.0118178	ZNF845, ZNF563, ZNF594, RREB1, ZNF786, ZNF451, ZKSCAN1, ZNF431, ZNF655, ZNF256, ZNF549, ZNF526	196	488	19113	2.39792	0.999565	0.383501	16.2671
UP_SEQ_FEATURE	zinc finger region:C2H2-type 15	6	3.04569	0.0121653	ZNF845, ZNF594, RREB1, ZNF786, ZNF256, ZNF549	196	134	19113	4.36636	0.999654	0.374195	16.7059
GOTERM_CC_FAT	GO:0012506~vesicle membrane	6	3.04569	0.0125296	COPA, SYNRG, AP4E1, MDM2, RAB11FIP1, FNDC3A	118	151	12782	4.30419	0.949625	0.180628	14.9918
GOTERM_MF_FAT	GO:0008134~transcription factor binding	13	6.59898	0.012996	YWHAZ, CTBP2, CREB1, YWHAB, FHL2, STAT3, JMY, VDR, NUP62, MNT, JMJD1C, LCOR, SERTAD2	147	513	12983	2.23812	0.977777	0.344895	15.9697
GOTERM_BP_FAT	GO:0051603~proteolysis involved in cellular protein catabolic process	14	7.1066	0.0130129	UBE2N, ARIH1, UBE4A, XIAP, SQSTM1, UFM1, USP1, UBE2G2, MDM2, USP35, SOCS5, RNF19B, FEM1B, NFX1	147	600	13528	2.1473	1	0.572245	19.0243
GOTERM_BP_FAT	GO:0042981~regulation of apoptosis	17	8.62944	0.0130892	DLC1, YWHAZ, XIAP, SGK3, CREB1, YWHAB, TNFSF15, FEM1B, YWHAE, GCLM, JMY, BFAR, VDR, NUP62, SQSTM1, MNT, DYRK2	147	804	13528	1.94585	1	0.554813	19.1251
INTERPRO	IPR017907:Zinc finger, RING-type, conserved site	9	4.56853	0.0131548	BFAR, ARIH1, XIAP, MEX3A, MDM2, RNF19B, RNF170, RNF145, NFX1	186	280	16659	2.87886	0.990669	0.405112	16.5847
GOTERM_CC_FAT	GO:0005794~Golgi apparatus	16	8.12183	0.0132047	COPA, SYNRG, RAB9A, AP4E1, ERGIC1, NUFIP2, SLC35B3, COL4A3BP, PLA2G12A, AP3D1, GNAS, CHSY1, YIPF5, FNDC3A, FGD6, SIK2	118	872	12782	1.98756	0.957163	0.178725	15.7375
GOTERM_BP_FAT	GO:0044257~cellular protein catabolic process	14	7.1066	0.0135171	UBE2N, ARIH1, UBE4A, XIAP, SQSTM1, UFM1, USP1, UBE2G2, MDM2, USP35, SOCS5, RNF19B, FEM1B, NFX1	147	603	13528	2.13662	1	0.548014	19.6882
GOTERM_BP_FAT	GO:0006351~transcription, DNA-dependent	9	4.56853	0.0139182	RREB1, CREB1, CCNT1, MNT, GTF2H3, NFIC, LCOR, IVNS1ABP, NFX1	147	292	13528	2.83646	1	0.541085	20.2127
GOTERM_BP_FAT	GO:0043067~regulation of programmed cell death	17	8.62944	0.014267	DLC1, YWHAZ, XIAP, SGK3, CREB1, YWHAB, TNFSF15, FEM1B, YWHAE, GCLM, JMY, BFAR, VDR, NUP62, SQSTM1, MNT, DYRK2	147	812	13528	1.92668	1	0.533385	20.6661
SP_PIR_KEYWORDS	cyclin	4	2.03046	0.0143758	CCND1, CCND2, CCNT1, CDK6	197	50	19235	7.81117	0.962089	0.184971	16.8996
GOTERM_BP_FAT	GO:0032870~cellular response to hormone stimulus	6	3.04569	0.0145976	NUP62, CCND2, GNAS, SIK2, STAT3, LATS2	147	133	13528	4.1516	1	0.5258	21.0937
GOTERM_BP_FAT	GO:0051301~cell division	9	4.56853	0.0147208	CCND1, CCND2, DSN1, CCNT1, CDK6, PAPD5, HMGA2, SEPT7, LATS2	147	295	13528	2.80761	1	0.513794	21.2525
GOTERM_BP_FAT	GO:0010941~regulation of cell death	17	8.62944	0.0147295	DLC1, YWHAZ, XIAP, SGK3, CREB1, YWHAB, TNFSF15, FEM1B, YWHAE, GCLM, JMY, BFAR, VDR, NUP62, SQSTM1, MNT, DYRK2	147	815	13528	1.91959	1	0.499771	21.2637
GOTERM_BP_FAT	GO:0032774~RNA biosynthetic process	9	4.56853	0.0149957	RREB1, CREB1, CCNT1, MNT, GTF2H3, NFIC, LCOR, IVNS1ABP, NFX1	147	296	13528	2.79812	1	0.492458	21.6058
GOTERM_MF_FAT	GO:0003723~RNA binding	16	8.12183	0.015131	RBM33, RBM41, RBM43, SETD1B, CCNT1, MEX3A, BICC1, DIS3L, NUFIP2, SERBP1, NUDT21, ESRP1, CELF1, PUM2, TNRC6A, LUC7L3	147	718	12983	1.96813	0.988166	0.358328	18.3554
UP_SEQ_FEATURE	zinc finger region:C2H2-type 4	13	6.59898	0.0152139	ZNF845, ZNF563, ZNF594, RREB1, ZNF786, ZNF451, ZKSCAN1, ZNF431, ZNF655, ZNF256, ZNF549, ZNF500, ZNF526	196	575	19113	2.20469	0.999954	0.425619	20.4633
UP_SEQ_FEATURE	domain:BTB	6	3.04569	0.0153062	KBTBD6, KLHL28, BTBD3, KCTD21, IVNS1ABP, ZBTB8A	196	142	19113	4.12037	0.999956	0.410507	20.5745
GOTERM_BP_FAT	GO:0010558~negative regulation of macromolecule biosynthetic process	13	6.59898	0.015362	ZNF281, CTBP2, YWHAB, STAT3, VDR, POU2F1, GATAD2A, MDM2, LCOR, NFIC, TNRC6A, KDM5B, NFX1	147	547	13528	2.18712	1	0.487848	22.0741
GOTERM_BP_FAT	GO:0051174~regulation of phosphorus metabolic process	12	6.09137	0.0160023	DLC1, ACVR2B, CCND1, NUP62, ADORA2B, CCND2, MAP3K2, CCNT1, YWHAB, TNFSF15, YWHAE, LATS2	147	485	13528	2.27696	1	0.489491	22.8865
GOTERM_BP_FAT	GO:0019220~regulation of phosphate metabolic process	12	6.09137	0.0160023	DLC1, ACVR2B, CCND1, NUP62, ADORA2B, CCND2, MAP3K2, CCNT1, YWHAB, TNFSF15, YWHAE, LATS2	147	485	13528	2.27696	1	0.489491	22.8865
UP_SEQ_FEATURE	repeat:Kelch 6	4	2.03046	0.0160238	MKLN1, KBTBD6, KLHL28, IVNS1ABP	196	52	19113	7.50118	0.999973	0.408916	21.4345
SP_PIR_KEYWORDS	acetylation	39	19.797	0.0160954	YWHAZ, PRPF4B, CCNT1, NAP1L1, INO80, ZNF655, BICC1, GCLM, NUFIP2, CHD9, MKLN1, NAA50, NUDT21, PUM2, FNDC3A, LUC7L3, SYNRG, MYO1C, UBE4A, FTO, YWHAB, CDK6, HMGA2, PRPF4, YWHAE, UBE2N, PGM3, TBC1D24, DBT, KIAA1143, FNBP1, CCT5, SERBP1, YME1L1, CELF1, JMJD1C, CHORDC1, SEPT7, MPHOSPH8	197	2635	19235	1.44514	0.974451	0.194035	18.7343
INTERPRO	IPR001841:Zinc finger, RING-type	9	4.56853	0.0175697	BFAR, ARIH1, XIAP, MEX3A, MDM2, RNF19B, RNF170, RNF145, NFX1	186	296	16659	2.72325	0.998083	0.465126	21.5525
SP_PIR_KEYWORDS	activator	12	6.09137	0.0178999	REL, RREB1, CREB1, SETD1B, POU2F1, MLXIP, CELF1, NFIC, LCOR, SS18L1, STAT3, NFX1	197	520	19235	2.25322	0.983127	0.202903	20.6193
GOTERM_BP_FAT	GO:0031327~negative regulation of cellular biosynthetic process	13	6.59898	0.018367	ZNF281, CTBP2, YWHAB, STAT3, VDR, POU2F1, GATAD2A, MDM2, LCOR, NFIC, TNRC6A, KDM5B, NFX1	147	561	13528	2.13254	1	0.525733	25.8184
GOTERM_BP_FAT	GO:0033554~cellular response to stress	13	6.59898	0.0195411	MICA, XIAP, ADORA2B, USP1, GTF2H3, JMY, UBE2N, CCND1, MAP3K2, COL4A3BP, DYRK2, POLQ, TNRC6A	147	566	13528	2.1137	1	0.535908	27.2349
GOTERM_CC_FAT	GO:0030117~membrane coat	4	2.03046	0.0199394	COPA, SYNRG, AP4E1, AP3D1	118	63	12782	6.87759	0.991548	0.244811	22.8524
GOTERM_CC_FAT	GO:0048475~coated membrane	4	2.03046	0.0199394	COPA, SYNRG, AP4E1, AP3D1	118	63	12782	6.87759	0.991548	0.244811	22.8524
GOTERM_BP_FAT	GO:0000079~regulation of cyclin-dependent protein kinase activity	4	2.03046	0.0204569	CCND1, CCND2, CCNT1, LATS2	147	54	13528	6.81683	1	0.540718	28.3223
GOTERM_BP_FAT	GO:0051318~G1 phase	3	1.52284	0.0212413	MDM2, CDK6, ZNF655	147	21	13528	13.1467	1	0.542962	29.2414
GOTERM_BP_FAT	GO:0009890~negative regulation of biosynthetic process	13	6.59898	0.0212783	ZNF281, CTBP2, YWHAB, STAT3, VDR, POU2F1, GATAD2A, MDM2, LCOR, NFIC, TNRC6A, KDM5B, NFX1	147	573	13528	2.08788	1	0.532613	29.2845
GOTERM_BP_FAT	GO:0009057~macromolecule catabolic process	16	8.12183	0.0214715	XIAP, UBE4A, USP1, UBE2G2, GTF2H3, SOCS5, FEM1B, UBE2N, ARIH1, UFM1, SQSTM1, MDM2, YME1L1, USP35, RNF19B, NFX1	147	781	13528	1.88532	1	0.525269	29.5091
UP_SEQ_FEATURE	zinc finger region:C2H2-type 14	6	3.04569	0.0225595	ZNF845, ZNF594, RREB1, ZNF786, ZNF256, ZNF549	196	157	19113	3.7267	1	0.507052	28.8773
GOTERM_BP_FAT	GO:0045934~negative regulation of nucleobase, nucleoside, nucleotide and nucleic acid metabolic process	12	6.09137	0.0228686	ZNF281, VDR, CTBP2, YWHAB, GATAD2A, POU2F1, MDM2, NFIC, LCOR, KDM5B, STAT3, NFX1	147	512	13528	2.15689	1	0.537616	31.1132
SP_PIR_KEYWORDS	kinase	14	7.1066	0.0242745	ACVR2B, PRPF4B, SGK3, TAOK1, MAP3K2, DYRK1A, DSTYK, CDK6, DYRK2, GK5, ABL2, SIK2, PRKX, LATS2	197	688	19235	1.98685	0.996127	0.253456	26.9602
GOTERM_BP_FAT	GO:0044265~cellular macromolecule catabolic process	15	7.61421	0.0249163	XIAP, UBE4A, USP1, UBE2G2, GTF2H3, SOCS5, FEM1B, UBE2N, ARIH1, UFM1, SQSTM1, MDM2, USP35, RNF19B, NFX1	147	725	13528	1.90401	1	0.558659	33.4024
GOTERM_BP_FAT	GO:0051172~negative regulation of nitrogen compound metabolic process	12	6.09137	0.0249575	ZNF281, VDR, CTBP2, YWHAB, GATAD2A, POU2F1, MDM2, NFIC, LCOR, KDM5B, STAT3, NFX1	147	519	13528	2.1278	1	0.549395	33.4477
GOTERM_BP_FAT	GO:0051329~interphase of mitotic cell cycle	5	2.53807	0.025304	CCND1, CCND2, MDM2, CDK6, LATS2	147	103	13528	4.46734	1	0.544838	33.8278
GOTERM_MF_FAT	GO:0003700~transcription factor activity	19	9.64467	0.0253783	ZNF281, CREB1, HOXA11, GTF2H3, ZKSCAN1, STAT3, ZNF500, VDR, REL, ZNF277, MNT, POU2F1, GATAD2A, GATAD1, LCOR, NFIC, KDM5B, ZNF256, NFX1	147	975	12983	1.7211	0.999436	0.493402	28.959
GOTERM_MF_FAT	GO:0016881~acid-amino acid ligase activity	7	3.5533	0.0260286	UBE2N, ARIH1, UBE4A, UBE2G2, MDM2, FEM1B, GCLM	147	201	12983	3.07581	0.999536	0.472472	29.5868
UP_SEQ_FEATURE	zinc finger region:C2H2-type 3	13	6.59898	0.0261625	ZNF281, ZNF845, ZNF594, ZNF563, RREB1, ZNF451, ZKSCAN1, ZNF655, ZNF549, ZNF526, ZNF500, ZNF431, ZNF256	196	622	19113	2.0381	1	0.543643	32.6936
KEGG_PATHWAY	hsa05220:Chronic myeloid leukemia	4	2.03046	0.0264882	CCND1, CTBP2, MDM2, CDK6	45	75	5085	6.02667	0.892274	0.524183	24.9847
UP_SEQ_FEATURE	compositionally biased region:His-rich	4	2.03046	0.0265527	RBM33, PRPF4B, CCNT1, NUFIP2	196	63	19113	6.19145	1	0.533134	33.0952
GOTERM_BP_FAT	GO:0051726~regulation of cell cycle	9	4.56853	0.0271484	CCND1, CCND2, BTG3, CCNT1, MNT, MDM2, CDK6, ZNF655, LATS2	147	331	13528	2.50225	1	0.561149	35.8165
SP_PIR_KEYWORDS	host-virus interaction	8	4.06091	0.0272043	TFRC, CREB1, CCNT1, MDM2, IVNS1ABP, YWHAE, STAT3, NFX1	197	285	19235	2.74076	0.998037	0.267775	29.715
GOTERM_BP_FAT	GO:0010605~negative regulation of macromolecule metabolic process	15	7.61421	0.0273125	ZNF281, CTBP2, YWHAB, YWHAE, STAT3, VDR, POU2F1, GATAD2A, MDM2, CELF1, LCOR, NFIC, TNRC6A, KDM5B, NFX1	147	734	13528	1.88067	1	0.554218	35.9906
SMART	SM00360:RRM	8	4.06091	0.0273772	RBM33, ENOX2, RBM41, RBM43, SETD1B, ESRP1, CELF1, TNRC6A	127	211	9079	2.71045	0.932297	0.592429	26.3862
UP_SEQ_FEATURE	zinc finger region:C2H2-type 8	10	5.07614	0.0277578	ZNF845, ZNF563, ZNF594, RREB1, ZNF786, ZNF451, ZNF431, ZNF256, ZNF549, ZNF526	196	417	19113	2.3385	1	0.534003	34.3215
GOTERM_CC_FAT	GO:0000139~Golgi membrane	6	3.04569	0.0280477	COPA, SYNRG, RAB9A, AP4E1, GNAS, CHSY1	118	186	12782	3.49426	0.99882	0.312417	30.6822
INTERPRO	IPR007087:Zinc finger, C2H2-type	16	8.12183	0.0285554	ZNF281, ZNF845, ZNF594, ZNF563, RREB1, ZNF451, ZKSCAN1, ZNF655, ZNF549, ZNF500, ZNF526, ZNF786, ZNF277, ZNF431, ZNF256, ZBTB8A	186	784	16659	1.82785	0.999964	0.605331	32.7487
GOTERM_BP_FAT	GO:0007242~intracellular signaling cascade	22	11.1675	0.0286296	RAB9A, ADORA2B, RREB1, YWHAB, TNFSF15, FHL2, SHOC2, SOCS5, YWHAE, LATS2, STAT3, VDR, CCND1, NUP62, MAP3K2, PDE7A, SQSTM1, GNAS, DYRK2, SIK2, PMEPA1, PLCXD1	147	1256	13528	1.61194	1	0.562548	37.3728
GOTERM_CC_FAT	GO:0030660~Golgi-associated vesicle membrane	3	1.52284	0.0287144	COPA, SYNRG, AP4E1	118	29	12782	11.2057	0.998997	0.304704	31.2921
GOTERM_MF_FAT	GO:0042169~SH2 domain binding	3	1.52284	0.0294885	DLC1, NUP62, SQSTM1	147	24	12983	11.04	0.999835	0.4883	32.8421
KEGG_PATHWAY	hsa04120:Ubiquitin mediated proteolysis	5	2.53807	0.0297764	UBE2N, UBE4A, XIAP, UBE2G2, MDM2	45	137	5085	4.12409	0.918649	0.46594	27.654
UP_SEQ_FEATURE	repeat:Kelch 5	4	2.03046	0.0299313	MKLN1, KBTBD6, KLHL28, IVNS1ABP	196	66	19113	5.91002	1	0.546751	36.4805
UP_SEQ_FEATURE	compositionally biased region:Ser-rich	10	5.07614	0.031039	CHD9, TAOK1, SQSTM1, CCNT1, PAPD5, CELF1, PUM2, RAB11FIP1, TNRC6A, NUFIP2	196	425	19113	2.29448	1	0.545922	37.5551
GOTERM_BP_FAT	GO:0035303~regulation of dephosphorylation	3	1.52284	0.0317436	DLC1, YWHAB, YWHAE	147	26	13528	10.6185	1	0.591932	40.5301
GOTERM_BP_FAT	GO:0035305~negative regulation of dephosphorylation	2	1.01523	0.0320315	YWHAB, YWHAE	147	3	13528	61.3515	1	0.586685	40.8143
GOTERM_BP_FAT	GO:0035308~negative regulation of protein amino acid dephosphorylation	2	1.01523	0.0320315	YWHAB, YWHAE	147	3	13528	61.3515	1	0.586685	40.8143
INTERPRO	IPR015880:Zinc finger, C2H2-like	16	8.12183	0.0323483	ZNF281, ZNF845, ZNF594, ZNF563, RREB1, ZNF451, ZKSCAN1, ZNF655, ZNF549, ZNF500, ZNF526, ZNF786, ZNF277, ZNF431, ZNF256, ZBTB8A	186	797	16659	1.79803	0.999991	0.619896	36.2567
GOTERM_BP_FAT	GO:0032268~regulation of cellular protein metabolic process	11	5.58376	0.0327042	UBE2N, DLC1, CCND1, CCND2, MAP3K2, YWHAB, MDM2, PUM2, FEM1B, YWHAE, TNRC6A	147	474	13528	2.13565	1	0.586007	41.4736
INTERPRO	IPR015451:Cyclin D	2	1.01523	0.0329487	CCND1, CCND2	186	3	16659	59.7097	0.999993	0.597377	36.7961
GOTERM_BP_FAT	GO:0045859~regulation of protein kinase activity	9	4.56853	0.0335272	ACVR2B, CCND1, NUP62, ADORA2B, CCND2, MAP3K2, CCNT1, TNFSF15, LATS2	147	345	13528	2.40071	1	0.587031	42.2707
BIOCARTA	h_cellcyclePathway:Cyclins and Cell Cycle Regulation	3	1.52284	0.0336913	CCND1, CCND2, CDK6	18	25	1437	9.58	0.892221	0.892221	29.4817
UP_SEQ_FEATURE	repeat:Kelch 4	4	2.03046	0.0347717	MKLN1, KBTBD6, KLHL28, IVNS1ABP	196	70	19113	5.5723	1	0.573996	41.0527
GOTERM_BP_FAT	GO:0022403~cell cycle phase	10	5.07614	0.0355051	CCND1, CCND2, DSN1, MDM2, CDK6, PAPD5, ZNF655, HMGA2, SEPT7, LATS2	147	414	13528	2.22288	1	0.600335	44.1449
GOTERM_BP_FAT	GO:0015031~protein transport	15	7.61421	0.0358642	COPA, YWHAZ, SYNRG, RAB9A, RTP4, AP4E1, MYO1C, YWHAB, YWHAE, LONP2, NUP62, AP3D1, YIPF5, GNAS, RAB11FIP1	147	762	13528	1.81156	1	0.596211	44.479
SP_PIR_KEYWORDS	kelch repeat	4	2.03046	0.0359305	MKLN1, KBTBD6, KLHL28, IVNS1ABP	197	71	19235	5.50082	0.999744	0.32551	37.3627
UP_SEQ_FEATURE	repeat:Kelch 2	4	2.03046	0.0360413	MKLN1, KBTBD6, KLHL28, IVNS1ABP	196	71	19113	5.49382	1	0.57405	42.2
UP_SEQ_FEATURE	repeat:Kelch 3	4	2.03046	0.0360413	MKLN1, KBTBD6, KLHL28, IVNS1ABP	196	71	19113	5.49382	1	0.57405	42.2
UP_SEQ_FEATURE	repeat:Kelch 1	4	2.03046	0.0360413	MKLN1, KBTBD6, KLHL28, IVNS1ABP	196	71	19113	5.49382	1	0.57405	42.2
UP_SEQ_FEATURE	zinc finger region:C2H2-type 1; degenerate	5	2.53807	0.0364286	ZNF845, ZNF563, ZNF786, ZNF431, ZNF549	196	122	19113	3.99653	1	0.565268	42.5459
GOTERM_MF_FAT	GO:0043130~ubiquitin binding	3	1.52284	0.0366926	UBE2N, NUP62, SQSTM1	147	27	12983	9.8133	0.999981	0.540229	39.1784
SP_PIR_KEYWORDS	nucleotide-binding	26	13.198	0.0367464	PRPF4B, RAB9A, UBE2G2, DSTYK, INO80, LATS2, PRKX, CHD9, LONP2, MAP3K2, GK5, DYRK2, SIK2, SGK3, MYO1C, TAOK1, CDK6, NUBPL, UBE2N, ACVR2B, CCT5, DYRK1A, GNAS, YME1L1, SEPT7, ABL2	197	1686	19235	1.50571	0.999788	0.319274	38.037
GOTERM_MF_FAT	GO:0003729~mRNA binding	4	2.03046	0.0381237	SERBP1, ESRP1, CELF1, LUC7L3	147	66	12983	5.35271	0.999988	0.529551	40.3693
GOTERM_BP_FAT	GO:0045184~establishment of protein localization	15	7.61421	0.0382762	COPA, YWHAZ, SYNRG, RAB9A, RTP4, AP4E1, MYO1C, YWHAB, YWHAE, LONP2, NUP62, AP3D1, YIPF5, GNAS, RAB11FIP1	147	769	13528	1.79507	1	0.612821	46.6749
GOTERM_MF_FAT	GO:0000166~nucleotide binding	35	17.7665	0.0382954	ENOX2, PRPF4B, RAB9A, SETD1B, UBE2G2, INO80, DSTYK, LATS2, PRKX, CHD9, LONP2, MAP3K2, DYRK2, GK5, POLQ, SIK2, TNRC6A, MTO1, RBM41, CTBP2, MYO1C, SGK3, TAOK1, CDK6, UBE2N, NUBPL, ACVR2B, CCT5, DYRK1A, ESRP1, GNAS, YME1L1, CELF1, ABL2, SEPT7	147	2245	12983	1.37692	0.999988	0.508446	40.5107
GOTERM_CC_FAT	GO:0030659~cytoplasmic vesicle membrane	5	2.53807	0.0387191	COPA, SYNRG, AP4E1, MDM2, RAB11FIP1	118	139	12782	3.89648	0.999914	0.373709	39.8713
GOTERM_MF_FAT	GO:0032182~small conjugating protein binding	3	1.52284	0.0392294	UBE2N, NUP62, SQSTM1	147	28	12983	9.46283	0.999991	0.49593	41.2746
GOTERM_MF_FAT	GO:0019787~small conjugating protein ligase activity	6	3.04569	0.0394372	UBE2N, ARIH1, UBE4A, UBE2G2, MDM2, FEM1B	147	166	12983	3.19228	0.999992	0.478205	41.4433
UP_SEQ_FEATURE	zinc finger region:C2H2-type 9	9	4.56853	0.0394777	ZNF845, ZNF563, RREB1, ZNF786, ZNF451, ZNF431, ZNF256, ZNF549, ZNF526	196	376	19113	2.33414	1	0.582735	45.202
SP_PIR_KEYWORDS	cell cycle control	3	1.52284	0.0395896	CCND1, CCND2, CDK6	197	31	19235	9.44899	0.999892	0.327612	40.335
GOTERM_BP_FAT	GO:0043549~regulation of kinase activity	9	4.56853	0.0397535	ACVR2B, CCND1, NUP62, ADORA2B, CCND2, MAP3K2, CCNT1, TNFSF15, LATS2	147	357	13528	2.32001	1	0.619441	47.9794
OMIM_DISEASE	Many sequence variants affecting diversity of adult human height	5	2.53807	0.0404632	UBE2N, DCAF7, CDK6, GATAD1, HMGA2	35	142	3671	3.69316	0.961729	0.961729	35.4688
GOTERM_CC_FAT	GO:0043232~intracellular non-membrane-bounded organelle	33	16.7513	0.0405031	MIDN, YWHAZ, ENOX2, PRPF4B, SETD1B, CCNT1, FHL2, ZNF655, IVNS1ABP, NUFIP2, LATS2, ESF1, CHD9, VDR, CEP170, NUDT21, GATAD2A, FGD6, SS18L1, MYO1C, DSN1, CREB1, HMGA2, STAT3, DBT, FNBP1, CCT5, NUP62, RPL7L1, MDM2, ABL2, SEPT7, MPHOSPH8	118	2596	12782	1.37698	0.999944	0.372883	41.2931
GOTERM_CC_FAT	GO:0043228~non-membrane-bounded organelle	33	16.7513	0.0405031	MIDN, YWHAZ, ENOX2, PRPF4B, SETD1B, CCNT1, FHL2, ZNF655, IVNS1ABP, NUFIP2, LATS2, ESF1, CHD9, VDR, CEP170, NUDT21, GATAD2A, FGD6, SS18L1, MYO1C, DSN1, CREB1, HMGA2, STAT3, DBT, FNBP1, CCT5, NUP62, RPL7L1, MDM2, ABL2, SEPT7, MPHOSPH8	118	2596	12782	1.37698	0.999944	0.372883	41.2931
GOTERM_BP_FAT	GO:0031399~regulation of protein modification process	8	4.06091	0.0408907	UBE2N, DLC1, CCND1, CCND2, MAP3K2, YWHAB, FEM1B, YWHAE	147	295	13528	2.49565	1	0.6226	48.9631
GOTERM_BP_FAT	GO:0006366~transcription from RNA polymerase II promoter	7	3.5533	0.0413614	RREB1, CCNT1, MNT, GTF2H3, NFIC, LCOR, NFX1	147	234	13528	2.75295	1	0.619617	49.3651
INTERPRO	IPR015915:Kelch-type beta propeller	4	2.03046	0.0414038	MKLN1, KBTBD6, KLHL28, IVNS1ABP	186	69	16659	5.19215	1	0.655684	43.9576
INTERPRO	IPR006652:Kelch repeat type 1	4	2.03046	0.0414038	MKLN1, KBTBD6, KLHL28, IVNS1ABP	186	69	16659	5.19215	1	0.655684	43.9576
UP_SEQ_FEATURE	compositionally biased region:Asp-rich	3	1.52284	0.0420454	ESF1, CLUAP1, SETD1B	196	32	19113	9.14206	1	0.594264	47.3494
GOTERM_MF_FAT	GO:0050815~phosphoserine binding	2	1.01523	0.0442338	YWHAB, YWHAE	147	4	12983	44.1599	0.999998	0.499885	45.2154
INTERPRO	IPR013087:Zinc finger, C2H2-type/integrase, DNA-binding	13	6.59898	0.0445786	ZNF845, ZNF281, ZNF563, ZNF594, RREB1, ZNF786, ZKSCAN1, ZNF431, ZNF655, ZNF256, ZNF549, ZNF500, ZNF526	186	621	16659	1.87494	1	0.658083	46.4466
GOTERM_MF_FAT	GO:0016879~ligase activity, forming carbon-nitrogen bonds	7	3.5533	0.0463057	UBE2N, ARIH1, UBE4A, UBE2G2, MDM2, FEM1B, GCLM	147	231	12983	2.67636	0.999999	0.498347	46.7741
GOTERM_CC_FAT	GO:0030120~vesicle coat	3	1.52284	0.0471554	COPA, SYNRG, AP4E1	118	38	12782	8.55174	0.999989	0.405693	46.3256
GOTERM_MF_FAT	GO:0042826~histone deacetylase binding	3	1.52284	0.0472211	NUDT21, YWHAB, YWHAE	147	31	12983	8.54707	0.999999	0.488446	47.4496
GOTERM_BP_FAT	GO:0000278~mitotic cell cycle	9	4.56853	0.0473259	CCND1, CCND2, DSN1, MDM2, CDK6, PAPD5, HMGA2, SEPT7, LATS2	147	370	13528	2.2385	1	0.663129	54.2088
GOTERM_BP_FAT	GO:0006511~ubiquitin-dependent protein catabolic process	7	3.5533	0.0473569	ARIH1, UBE4A, SQSTM1, USP1, UBE2G2, MDM2, USP35	147	242	13528	2.66194	1	0.656389	54.2329
GOTERM_BP_FAT	GO:0051338~regulation of transferase activity	9	4.56853	0.0485692	ACVR2B, CCND1, NUP62, ADORA2B, CCND2, MAP3K2, CCNT1, TNFSF15, LATS2	147	372	13528	2.22646	1	0.659037	55.1622
GOTERM_BP_FAT	GO:0006974~response to DNA damage stimulus	9	4.56853	0.0491989	UBE2N, CCND1, MICA, XIAP, USP1, GTF2H3, DYRK2, POLQ, JMY	147	373	13528	2.2205	1	0.657151	55.6379
INTERPRO	IPR000210:BTB/POZ-like	6	3.04569	0.0497224	KBTBD6, KLHL28, BTBD3, KCTD21, IVNS1ABP, ZBTB8A	186	179	16659	3.00216	1	0.675417	50.2628
GOTERM_BP_FAT	GO:0006886~intracellular protein transport	9	4.56853	0.0498338	COPA, SYNRG, YWHAZ, LONP2, RTP4, AP4E1, YWHAB, AP3D1, YWHAE	147	374	13528	2.21456	1	0.655365	56.1127
GOTERM_MF_FAT	GO:0019900~kinase binding	6	3.04569	0.0515478	CCND1, TAOK1, CCND2, SQSTM1, SLC2A1, STAT3	147	179	12983	2.96044	1	0.503434	50.5366
INTERPRO	IPR011333:BTB/POZ fold	6	3.04569	0.0517063	KBTBD6, KLHL28, BTBD3, KCTD21, IVNS1ABP, ZBTB8A	186	181	16659	2.96899	1	0.667933	51.6661
INTERPRO	IPR006671:Cyclin, N-terminal	3	1.52284	0.0517262	CCND1, CCND2, CCNT1	186	33	16659	8.14223	1	0.647105	51.6799
UP_SEQ_FEATURE	zinc finger region:C2H2-type 1	11	5.58376	0.0517888	ZNF281, ZNF594, RREB1, ZNF451, ZNF277, ZKSCAN1, ZNF655, ZNF256, ZNF500, ZNF526, ZBTB8A	196	542	19113	1.97909	1	0.661029	54.8041
GOTERM_BP_FAT	GO:0046907~intracellular transport	13	6.59898	0.0519946	COPA, SYNRG, YWHAZ, LONP2, RTP4, AP4E1, SQSTM1, YWHAB, AP3D1, MLXIP, GNAS, ERGIC1, YWHAE	147	657	13528	1.82093	1	0.664856	57.6934
KEGG_PATHWAY	hsa04912:GnRH signaling pathway	4	2.03046	0.052061	MAP3K2, PLA2G12A, GNAS, PRKX	45	98	5085	4.61224	0.988176	0.588325	43.5909
GOTERM_BP_FAT	GO:0006325~chromatin organization	9	4.56853	0.0524268	UBE2N, CHD9, SETD1B, NAP1L1, INO80, JMJD1C, HMGA2, KDM5B, MPHOSPH8	147	378	13528	2.19112	1	0.661598	58.003
INTERPRO	IPR013069:BTB/POZ	5	2.53807	0.0531932	KBTBD6, KLHL28, BTBD3, IVNS1ABP, ZBTB8A	186	127	16659	3.52616	1	0.63779	52.6936
SMART	SM00184:RING	9	4.56853	0.0534721	BFAR, ARIH1, XIAP, MEX3A, MDM2, RNF19B, RNF170, RNF145, NFX1	127	296	9079	2.17363	0.995159	0.736224	45.4724
GOTERM_BP_FAT	GO:0008104~protein localization	16	8.12183	0.0535096	COPA, YWHAZ, SYNRG, RAB9A, RTP4, MYO1C, AP4E1, YWHAB, YWHAE, LONP2, NUP62, SQSTM1, AP3D1, YIPF5, GNAS, RAB11FIP1	147	882	13528	1.66943	1	0.663034	58.7695
GOTERM_CC_FAT	GO:0017053~transcriptional repressor complex	3	1.52284	0.0540454	CTBP2, YWHAB, GATAD2A	118	41	12782	7.926	0.999998	0.435896	51.116
GOTERM_CC_FAT	GO:0012505~endomembrane system	13	6.59898	0.0540611	COPA, SYNRG, RAB9A, AP4E1, MYO1C, NUP62, COL4A3BP, MDM2, CHSY1, KDSR, GNAS, FNDC3A, RAB11FIP1	118	782	12782	1.80075	0.999998	0.422372	51.1264
UP_SEQ_FEATURE	domain:KRAB	8	4.06091	0.0541143	ZNF845, ZNF563, ZNF786, ZKSCAN1, ZNF431, ZNF256, ZNF549, ZNF500	196	332	19113	2.34977	1	0.666295	56.4315
GOTERM_MF_FAT	GO:0035257~nuclear hormone receptor binding	4	2.03046	0.0558126	VDR, NUP62, FHL2, JMJD1C	147	77	12983	4.58804	1	0.51646	53.4145
GOTERM_MF_FAT	GO:0046872~metal ion binding	57	28.934	0.0567045	COPA, PDP2, ENOX2, ZNF451, ZKSCAN1, LATS2, FAHD1, GATAD1, SIK2, KDM5B, NFX1, RNF145, ZNF281, ZNF594, SYNRG, RREB1, GTF2H3, ZNF549, RNF170, ZNF500, PGM3, ACVR2B, THBD, MTF2, RRM2, ZNF786, ZNF277, MDM2, ZNF431, YME1L1, CHSY1, JMJD1C, CHORDC1, ZNF845, ZC3H4, XIAP, FHL2, ZNF655, ARIH1, VDR, SQSTM1, MAP3K2, PLA2G12A, GATAD2A, LIMD1, DYRK2, FGD6, ZNF563, MEX3A, CYP20A1, STAT3, ZNF526, BFAR, RNF19B, ABL…	147	4140	12983	1.216	1	0.507275	53.9964
UP_SEQ_FEATURE	zinc finger region:GATA-type	2	1.01523	0.0596822	GATAD2A, GATAD1	196	6	19113	32.5051	1	0.692186	60.1084
GOTERM_CC_FAT	GO:0005694~chromosome	9	4.56853	0.06028	CHD9, VDR, PRPF4B, DSN1, CREB1, HMGA2, SEPT7, MPHOSPH8, SS18L1	118	460	12782	2.11934	1	0.445342	55.1076
SP_PIR_KEYWORDS	DNA binding	8	4.06091	0.0606437	VDR, REL, CREB1, HOXA11, POU2F1, ZKSCAN1, NFIC, STAT3	197	340	19235	2.2974	0.999999	0.44518	55.0583
KEGG_PATHWAY	hsa05200:Pathways in cancer	7	3.5533	0.0611781	CCND1, CTBP2, XIAP, SLC2A1, MDM2, CDK6, STAT3	45	328	5085	2.41159	0.994698	0.582425	49.1369
UP_SEQ_FEATURE	domain:UBA	3	1.52284	0.0627357	SQSTM1, SIK2, LATS2	196	40	19113	7.31365	1	0.700336	61.9998
INTERPRO	IPR013763:Cyclin-related	3	1.52284	0.0634097	CCND1, CCND2, CCNT1	186	37	16659	7.26199	1	0.685333	59.2247
GOTERM_CC_FAT	GO:0044427~chromosomal part	8	4.06091	0.0640127	CHD9, VDR, DSN1, CREB1, HMGA2, SEPT7, MPHOSPH8, SS18L1	118	386	12782	2.24502	1	0.45284	57.3513
GOTERM_MF_FAT	GO:0005524~ATP binding	24	12.1827	0.065971	PRPF4B, MYO1C, SGK3, TAOK1, UBE2G2, INO80, DSTYK, CDK6, LATS2, PRKX, UBE2N, NUBPL, CHD9, ACVR2B, CCT5, LONP2, MAP3K2, DYRK1A, YME1L1, DYRK2, GK5, POLQ, ABL2, SIK2	147	1477	12983	1.43512	1	0.54815	59.6573
GOTERM_MF_FAT	GO:0043169~cation binding	57	28.934	0.0663554	COPA, PDP2, ENOX2, ZNF451, ZKSCAN1, LATS2, FAHD1, GATAD1, SIK2, KDM5B, NFX1, RNF145, ZNF281, ZNF594, SYNRG, RREB1, GTF2H3, ZNF549, RNF170, ZNF500, PGM3, ACVR2B, THBD, MTF2, RRM2, ZNF786, ZNF277, MDM2, ZNF431, YME1L1, CHSY1, JMJD1C, CHORDC1, ZNF845, ZC3H4, XIAP, FHL2, ZNF655, ARIH1, VDR, SQSTM1, MAP3K2, PLA2G12A, GATAD2A, LIMD1, DYRK2, FGD6, ZNF563, MEX3A, CYP20A1, STAT3, ZNF526, BFAR, RNF19B, ABL…	147	4179	12983	1.20465	1	0.536272	59.8776
GOTERM_BP_FAT	GO:0000122~negative regulation of transcription from RNA polymerase II promoter	7	3.5533	0.068448	ZNF281, VDR, MDM2, NFIC, LCOR, STAT3, NFX1	147	266	13528	2.42177	1	0.748187	68.0914
KEGG_PATHWAY	hsa04114:Oocyte meiosis	4	2.03046	0.068831	YWHAZ, YWHAB, YWHAE, PRKX	45	110	5085	4.10909	0.997312	0.570695	53.4053
SMART	SM00612:Kelch	4	2.03046	0.0706755	MKLN1, KBTBD6, KLHL28, IVNS1ABP	127	69	9079	4.14424	0.999183	0.758761	55.4645
KEGG_PATHWAY	hsa04270:Vascular smooth muscle contraction	4	2.03046	0.0718407	ADORA2B, PLA2G12A, GNAS, PRKX	45	112	5085	4.03571	0.997946	0.538594	54.9929
INTERPRO	IPR006670:Cyclin	3	1.52284	0.0726961	CCND1, CCND2, CCNT1	186	40	16659	6.71734	1	0.718798	64.4259
GOTERM_MF_FAT	GO:0032559~adenyl ribonucleotide binding	24	12.1827	0.074266	PRPF4B, MYO1C, SGK3, TAOK1, UBE2G2, INO80, DSTYK, CDK6, LATS2, PRKX, UBE2N, NUBPL, CHD9, ACVR2B, CCT5, LONP2, MAP3K2, DYRK1A, YME1L1, DYRK2, GK5, POLQ, ABL2, SIK2	147	1497	12983	1.41595	1	0.564693	64.171
SP_PIR_KEYWORDS	Endocytosis	4	2.03046	0.0749308	FNBP1, SYNRG, THBD, TFRC	197	96	19235	4.06832	1	0.505444	63.0551
GOTERM_MF_FAT	GO:0030554~adenyl nucleotide binding	25	12.6904	0.0750732	PRPF4B, UBE2G2, DSTYK, INO80, PRKX, LATS2, CHD9, LONP2, MAP3K2, GK5, DYRK2, POLQ, SIK2, MTO1, SGK3, MYO1C, TAOK1, CDK6, NUBPL, UBE2N, ACVR2B, CCT5, DYRK1A, YME1L1, ABL2	147	1577	12983	1.40012	1	0.555616	64.5843
GOTERM_MF_FAT	GO:0051427~hormone receptor binding	4	2.03046	0.0767238	VDR, NUP62, FHL2, JMJD1C	147	88	12983	4.01453	1	0.55113	65.4158
GOTERM_BP_FAT	GO:0034613~cellular protein localization	9	4.56853	0.0771415	COPA, SYNRG, YWHAZ, LONP2, RTP4, AP4E1, YWHAB, AP3D1, YWHAE	147	411	13528	2.01519	1	0.784725	72.5649
SP_PIR_KEYWORDS	repressor	9	4.56853	0.0772073	ZNF281, CTBP2, RREB1, GATAD2A, MNT, LIMD1, LCOR, ZNF256, NFX1	197	435	19235	2.02013	1	0.502636	64.2008
GOTERM_BP_FAT	GO:0045667~regulation of osteoblast differentiation	3	1.52284	0.0784021	ACVR2B, CDK6, GNAS	147	43	13528	6.4205	1	0.78493	73.1625
SP_PIR_KEYWORDS	golgi apparatus	11	5.58376	0.0790959	COPA, SYNRG, RAB9A, AP4E1, SLC35B3, COL4A3BP, AP3D1, YIPF5, CHSY1, ERGIC1, FNDC3A	197	588	19235	1.82659	1	0.49828	65.1262
INTERPRO	IPR015940:Ubiquitin-associated/translation elongation factor EF1B, N-terminal, eukaryote	3	1.52284	0.0791149	SQSTM1, SIK2, LATS2	186	42	16659	6.39747	1	0.733523	67.6537
GOTERM_BP_FAT	GO:0010604~positive regulation of macromolecule metabolic process	15	7.61421	0.0791256	DLC1, CREB1, FHL2, STAT3, UBE2N, CCND1, NUP62, REL, CCND2, SQSTM1, POU2F1, MDM2, DYRK2, NFIC, SERTAD2	147	857	13528	1.61074	1	0.782802	73.4999
GOTERM_CC_FAT	GO:0005798~Golgi-associated vesicle	3	1.52284	0.0792762	COPA, SYNRG, AP4E1	118	51	12782	6.37188	1	0.515676	65.4918
GOTERM_BP_FAT	GO:0070727~cellular macromolecule localization	9	4.56853	0.0796861	COPA, SYNRG, YWHAZ, LONP2, RTP4, AP4E1, YWHAB, AP3D1, YWHAE	147	414	13528	2.00059	1	0.780014	73.7586
PIR_SUPERFAMILY	PIRSF001990:class I histocompatibility antigen	2	1.01523	0.0798102	MICA, HLA-E	69	9	7396	23.8196	0.998996	0.968311	58.963
GOTERM_BP_FAT	GO:0045737~positive regulation of cyclin-dependent protein kinase activity	2	1.01523	0.0831683	CCND1, CCND2	147	8	13528	23.0068	1	0.789644	75.3132
SP_PIR_KEYWORDS	magnesium	9	4.56853	0.0833841	FAHD1, PGM3, ACVR2B, PDP2, MAP3K2, DYRK2, SIK2, ABL2, LATS2	197	442	19235	1.98814	1	0.50478	67.1463
GOTERM_MF_FAT	GO:0019901~protein kinase binding	5	2.53807	0.0840872	CCND1, TAOK1, CCND2, SQSTM1, STAT3	147	147	12983	3.00407	1	0.573435	68.9098
GOTERM_MF_FAT	GO:0004842~ubiquitin-protein ligase activity	5	2.53807	0.0840872	UBE2N, UBE4A, UBE2G2, MDM2, FEM1B	147	147	12983	3.00407	1	0.573435	68.9098
GOTERM_MF_FAT	GO:0043167~ion binding	57	28.934	0.0841661	COPA, PDP2, ENOX2, ZNF451, ZKSCAN1, LATS2, FAHD1, GATAD1, SIK2, KDM5B, NFX1, RNF145, ZNF281, ZNF594, SYNRG, RREB1, GTF2H3, ZNF549, RNF170, ZNF500, PGM3, ACVR2B, THBD, MTF2, RRM2, ZNF786, ZNF277, MDM2, ZNF431, YME1L1, CHSY1, JMJD1C, CHORDC1, ZNF845, ZC3H4, XIAP, FHL2, ZNF655, ARIH1, VDR, SQSTM1, MAP3K2, PLA2G12A, GATAD2A, LIMD1, DYRK2, FGD6, ZNF563, MEX3A, CYP20A1, STAT3, ZNF526, BFAR, RNF19B, ABL…	147	4241	12983	1.18704	1	0.561903	68.9454
GOTERM_BP_FAT	GO:0042493~response to drug	6	3.04569	0.0847383	CCND1, YWHAZ, CREB1, GNAS, GCLM, STAT3	147	216	13528	2.55631	1	0.791046	75.9856
GOTERM_BP_FAT	GO:0022402~cell cycle process	11	5.58376	0.0852104	CCND1, CCND2, DSN1, MDM2, CDK6, PAPD5, ZNF655, HMGA2, SEPT7, LATS2, JMY	147	565	13528	1.79168	1	0.788019	76.1844
GOTERM_MF_FAT	GO:0001883~purine nucleoside binding	25	12.6904	0.0857622	PRPF4B, UBE2G2, DSTYK, INO80, PRKX, LATS2, CHD9, LONP2, MAP3K2, GK5, DYRK2, POLQ, SIK2, MTO1, SGK3, MYO1C, TAOK1, CDK6, NUBPL, UBE2N, ACVR2B, CCT5, DYRK1A, YME1L1, ABL2	147	1601	12983	1.37913	1	0.557532	69.6576
SP_PIR_KEYWORDS	Proto-oncogene	6	3.04569	0.0867238	CCND1, REL, MDM2, GNAS, KDSR, HMGA2	197	230	19235	2.54712	1	0.506862	68.6442
GOTERM_BP_FAT	GO:0008380~RNA splicing	7	3.5533	0.0873461	PRPF4B, NUDT21, ESRP1, CELF1, IVNS1ABP, PRPF4, LUC7L3	147	284	13528	2.26828	1	0.791655	77.0645
UP_SEQ_FEATURE	region of interest:Necessary for nuclear localization	2	1.01523	0.0881806	LIMD1, SS18L1	196	9	19113	21.6701	1	0.811627	74.8073
GOTERM_BP_FAT	GO:0008219~cell death	13	6.59898	0.0884091	DLC1, MFSD8, MICA, XIAP, YWHAB, TNFSF15, FEM1B, YWHAE, BFAR, NUP62, SQSTM1, DYRK2, LUC7L3	147	719	13528	1.66391	1	0.791024	77.4911
INTERPRO	IPR012677:Nucleotide-binding, alpha-beta plait	6	3.04569	0.0891663	ENOX2, RBM41, SETD1B, ESRP1, CELF1, TNRC6A	186	213	16659	2.52294	1	0.761506	72.1674
GOTERM_BP_FAT	GO:0010033~response to organic substance	13	6.59898	0.0897969	CREB1, FHL2, LATS2, STAT3, ACVR2B, CCND1, THBD, LONP2, TFRC, NUP62, CCND2, GNAS, SIK2	147	721	13528	1.6593	1	0.791658	78.0368
GOTERM_MF_FAT	GO:0001882~nucleoside binding	25	12.6904	0.090991	PRPF4B, UBE2G2, DSTYK, INO80, PRKX, LATS2, CHD9, LONP2, MAP3K2, GK5, DYRK2, POLQ, SIK2, MTO1, SGK3, MYO1C, TAOK1, CDK6, NUBPL, UBE2N, ACVR2B, CCT5, DYRK1A, YME1L1, ABL2	147	1612	12983	1.36972	1	0.568832	71.8863
GOTERM_BP_FAT	GO:0016265~death	13	6.59898	0.091904	DLC1, MFSD8, MICA, XIAP, YWHAB, TNFSF15, FEM1B, YWHAE, BFAR, NUP62, SQSTM1, DYRK2, LUC7L3	147	724	13528	1.65242	1	0.794965	78.8418
SP_PIR_KEYWORDS	ligase	7	3.5533	0.0925141	UBE2N, XIAP, UBE2G2, MDM2, RNF19B, GCLM, NFX1	197	305	19235	2.24091	1	0.518724	71.0929
GOTERM_CC_FAT	GO:0044433~cytoplasmic vesicle part	5	2.53807	0.0926076	COPA, SYNRG, AP4E1, MDM2, RAB11FIP1	118	187	12782	2.89631	1	0.560695	71.4026
GOTERM_BP_FAT	GO:0046580~negative regulation of Ras protein signal transduction	2	1.01523	0.093069	DLC1, NUP62	147	9	13528	20.4505	1	0.794719	79.2749
GOTERM_BP_FAT	GO:0051058~negative regulation of small GTPase mediated signal transduction	2	1.01523	0.093069	DLC1, NUP62	147	9	13528	20.4505	1	0.794719	79.2749
GOTERM_BP_FAT	GO:0045860~positive regulation of protein kinase activity	6	3.04569	0.0939425	ACVR2B, CCND1, ADORA2B, CCND2, MAP3K2, TNFSF15	147	223	13528	2.47607	1	0.793424	79.5942
GOTERM_BP_FAT	GO:0006357~regulation of transcription from RNA polymerase II promoter	13	6.59898	0.0940416	ZNF281, CREB1, FHL2, STAT3, JMY, CIAO1, VDR, SQSTM1, POU2F1, MDM2, LCOR, NFIC, NFX1	147	727	13528	1.6456	1	0.789338	79.6301
SP_PIR_KEYWORDS	cytoplasmic vesicle	6	3.04569	0.0958058	COPA, FNBP1, SGK3, GNAS, YIPF5, RAB11FIP1	197	238	19235	2.4615	1	0.520119	72.4052
GOTERM_BP_FAT	GO:0008285~negative regulation of cell proliferation	8	4.06091	0.0961782	DLC1, VDR, CTBP2, NUP62, BTG3, MNT, TNFSF15, CDK6	147	361	13528	2.03938	1	0.792676	80.3904
GOTERM_CC_FAT	GO:0030126~COPI vesicle coat	2	1.01523	0.0962404	COPA, AP4E1	118	11	12782	19.6949	1	0.562633	72.8429
PIR_SUPERFAMILY	PIRSF001771:cyclin, A/B/D/E types	2	1.01523	0.0966748	CCND1, CCND2	69	11	7396	19.4888	0.999784	0.939972	66.3372
GOTERM_BP_FAT	GO:0006259~DNA metabolic process	10	5.07614	0.0971621	UBE2N, USP1, RRM2, NAP1L1, GATAD2A, GTF2H3, PAPD5, POLQ, NFIC, JMY	147	506	13528	1.81872	1	0.79185	80.7315
SP_PIR_KEYWORDS	mhc i	2	1.01523	0.0973717	MICA, HLA-E	197	10	19235	19.5279	1	0.514955	73.0099
SP_PIR_KEYWORDS	cell cycle	9	4.56853	0.0994691	CCND1, CCND2, DSN1, CCNT1, CDK6, PAPD5, HMGA2, SEPT7, LATS2	197	461	19235	1.9062	1	0.51204	73.8008
GOTERM_CC_FAT	GO:0030529~ribonucleoprotein complex	9	4.56853	0.0999377	PRPF4B, NUP62, RPL7L1, MEX3A, CELF1, IVNS1ABP, PRPF4, TNRC6A, NUFIP2	118	515	12782	1.89301	1	0.564735	74.2397

## Sheet: GO_BP
Category	Term	Count	%	PValue	Genes	List Total	Pop Hits	Pop Total	Fold Enrichment	Bonferroni	Benjamini	FDR
GOTERM_BP_FAT	GO:0045449~regulation of transcription	51	25.8883	1.2134e-05	TAF1D, ZNF451, CCNT1, ZKSCAN1, NFATC2IP, ESF1, GATAD1, KDM5B, NFX1, SERTAD2, ZNF281, ZNF594, CTBP2, RREB1, GTF2H3, HMGA2, ZNF549, ZNF500, JMY, UBE2N, CIAO1, ACVR2B, ZNF786, MNT, ZNF277, MDM2, ZNF431, JMJD1C, LCOR, ZNF845, HOXA11, SETD1B, FHL2, ZNF655, VDR, CHD9, REL, SQSTM1, POU2F1, GATAD2A, MLXIP, LIMD1, ZNF563, CREB1, YWHAB, STAT3, ZNF526, NUP62, NFIC, ZNF256, ZBTB8A	147	2601	13528	1.80446	0.0140607	0.0140607	0.0195468
GOTERM_BP_FAT	GO:0051252~regulation of RNA metabolic process	39	19.797	3.17049e-05	ZNF845, HOXA11, FHL2, ZKSCAN1, ZNF655, NFATC2IP, VDR, REL, SQSTM1, GATAD2A, POU2F1, LIMD1, GATAD1, KDM5B, SERTAD2, NFX1, ZNF281, ZNF563, CTBP2, RREB1, CREB1, GTF2H3, HMGA2, ZNF549, STAT3, ZNF500, JMY, CIAO1, ZNF786, SERBP1, MNT, ZNF277, ESRP1, MDM2, ZNF431, JMJD1C, NFIC, LCOR, ZNF256	147	1813	13528	1.97963	0.0363241	0.01833	0.0510662
GOTERM_BP_FAT	GO:0006355~regulation of transcription, DNA-dependent	37	18.7817	0.000106119	ZNF845, HOXA11, FHL2, ZKSCAN1, ZNF655, NFATC2IP, VDR, REL, SQSTM1, GATAD2A, POU2F1, LIMD1, GATAD1, KDM5B, SERTAD2, NFX1, ZNF281, ZNF563, CTBP2, RREB1, CREB1, GTF2H3, HMGA2, ZNF549, STAT3, ZNF500, JMY, CIAO1, ZNF786, MNT, ZNF277, MDM2, ZNF431, JMJD1C, NFIC, LCOR, ZNF256	147	1773	13528	1.92048	0.116485	0.0404418	0.170826
GOTERM_BP_FAT	GO:0006350~transcription	40	20.3046	0.000342268	ZNF845, SETD1B, HOXA11, TAF1D, CCNT1, ZNF451, FHL2, ZKSCAN1, ZNF655, IVNS1ABP, ESF1, CHD9, VDR, REL, GATAD2A, POU2F1, MLXIP, KDM5B, SERTAD2, NFX1, ZNF281, ZNF563, ZNF594, RREB1, CREB1, GTF2H3, HMGA2, ZNF549, STAT3, ZNF526, ZNF500, ZNF786, MNT, ZNF277, ZNF431, JMJD1C, NFIC, LCOR, ZNF256, ZBTB8A	147	2101	13528	1.75206	0.329342	0.0950484	0.54999
GOTERM_BP_FAT	GO:0006468~protein amino acid phosphorylation	18	9.13706	0.000852806	PRPF4B, ADORA2B, SGK3, TAOK1, CREB1, CCNT1, DSTYK, CDK6, LATS2, PRKX, ACVR2B, CCND1, MAP3K2, COL4A3BP, DYRK1A, DYRK2, ABL2, SIK2	147	667	13528	2.48349	0.630517	0.180557	1.3651
GOTERM_BP_FAT	GO:0035304~regulation of protein amino acid dephosphorylation	3	1.52284	0.00168663	DLC1, YWHAB, YWHAE	147	6	13528	46.0136	0.860537	0.279872	2.6829
GOTERM_BP_FAT	GO:0010629~negative regulation of gene expression	14	7.1066	0.00317381	ZNF281, CTBP2, YWHAB, STAT3, VDR, POU2F1, GATAD2A, MDM2, CELF1, LCOR, NFIC, TNRC6A, KDM5B, NFX1	147	504	13528	2.55631	0.975516	0.411372	4.9924
GOTERM_BP_FAT	GO:0045892~negative regulation of transcription, DNA-dependent	11	5.58376	0.00525413	ZNF281, VDR, CTBP2, GATAD2A, POU2F1, MDM2, NFIC, LCOR, KDM5B, STAT3, NFX1	147	356	13528	2.84354	0.997862	0.536277	8.13686
GOTERM_BP_FAT	GO:0016310~phosphorylation	18	9.13706	0.00568639	PRPF4B, ADORA2B, SGK3, TAOK1, CREB1, CCNT1, DSTYK, CDK6, LATS2, PRKX, ACVR2B, CCND1, MAP3K2, COL4A3BP, DYRK1A, DYRK2, ABL2, SIK2	147	800	13528	2.07061	0.998712	0.522618	8.77785
GOTERM_BP_FAT	GO:0051325~interphase	6	3.04569	0.00579149	CCND1, CCND2, MDM2, CDK6, ZNF655, LATS2	147	106	13528	5.20909	0.998862	0.492283	8.93307
GOTERM_BP_FAT	GO:0051253~negative regulation of RNA metabolic process	11	5.58376	0.00589338	ZNF281, VDR, CTBP2, GATAD2A, POU2F1, MDM2, NFIC, LCOR, KDM5B, STAT3, NFX1	147	362	13528	2.79641	0.99899	0.465853	9.08332
GOTERM_BP_FAT	GO:0030163~protein catabolic process	15	7.61421	0.00735092	XIAP, UBE4A, USP1, UBE2G2, SOCS5, FEM1B, UBE2N, ARIH1, UFM1, SQSTM1, MDM2, YME1L1, USP35, RNF19B, NFX1	147	622	13528	2.21931	0.999818	0.512038	11.2072
GOTERM_BP_FAT	GO:0006796~phosphate metabolic process	20	10.1523	0.00849345	PDP2, PRPF4B, ADORA2B, SGK3, TAOK1, CREB1, CCNT1, DSTYK, CDK6, LATS2, PRKX, ACVR2B, CCND1, MAP3K2, COL4A3BP, DYRK1A, GK5, DYRK2, ABL2, SIK2	147	973	13528	1.89162	0.999952	0.534995	12.8395
GOTERM_BP_FAT	GO:0006793~phosphorus metabolic process	20	10.1523	0.00849345	PDP2, PRPF4B, ADORA2B, SGK3, TAOK1, CREB1, CCNT1, DSTYK, CDK6, LATS2, PRKX, ACVR2B, CCND1, MAP3K2, COL4A3BP, DYRK1A, GK5, DYRK2, ABL2, SIK2	147	973	13528	1.89162	0.999952	0.534995	12.8395
GOTERM_BP_FAT	GO:0043632~modification-dependent macromolecule catabolic process	14	7.1066	0.00922864	UBE2N, ARIH1, UBE4A, XIAP, SQSTM1, UFM1, USP1, UBE2G2, MDM2, USP35, SOCS5, RNF19B, FEM1B, NFX1	147	574	13528	2.24457	0.99998	0.538302	13.8749
GOTERM_BP_FAT	GO:0019941~modification-dependent protein catabolic process	14	7.1066	0.00922864	UBE2N, ARIH1, UBE4A, XIAP, SQSTM1, UFM1, USP1, UBE2G2, MDM2, USP35, SOCS5, RNF19B, FEM1B, NFX1	147	574	13528	2.24457	0.99998	0.538302	13.8749
GOTERM_BP_FAT	GO:0043085~positive regulation of catalytic activity	13	6.59898	0.0106395	DLC1, ADORA2B, TNFSF15, YWHAB, GCLM, UBE2N, VDR, ACVR2B, CCND1, MAP3K2, CCND2, GNAS, ABL2	147	520	13528	2.30068	0.999996	0.564904	15.8296
GOTERM_BP_FAT	GO:0044093~positive regulation of molecular function	14	7.1066	0.0108495	DLC1, ADORA2B, YWHAB, TNFSF15, GCLM, JMY, UBE2N, VDR, ACVR2B, CCND1, MAP3K2, CCND2, GNAS, ABL2	147	586	13528	2.1986	0.999997	0.548717	16.117
GOTERM_BP_FAT	GO:0016481~negative regulation of transcription	12	6.09137	0.0109841	ZNF281, VDR, CTBP2, YWHAB, GATAD2A, POU2F1, MDM2, NFIC, LCOR, KDM5B, STAT3, NFX1	147	459	13528	2.40594	0.999997	0.531489	16.3006
GOTERM_BP_FAT	GO:0051603~proteolysis involved in cellular protein catabolic process	14	7.1066	0.0130129	UBE2N, ARIH1, UBE4A, XIAP, SQSTM1, UFM1, USP1, UBE2G2, MDM2, USP35, SOCS5, RNF19B, FEM1B, NFX1	147	600	13528	2.1473	1	0.572245	19.0243
GOTERM_BP_FAT	GO:0042981~regulation of apoptosis	17	8.62944	0.0130892	DLC1, YWHAZ, XIAP, SGK3, CREB1, YWHAB, TNFSF15, FEM1B, YWHAE, GCLM, JMY, BFAR, VDR, NUP62, SQSTM1, MNT, DYRK2	147	804	13528	1.94585	1	0.554813	19.1251
GOTERM_BP_FAT	GO:0044257~cellular protein catabolic process	14	7.1066	0.0135171	UBE2N, ARIH1, UBE4A, XIAP, SQSTM1, UFM1, USP1, UBE2G2, MDM2, USP35, SOCS5, RNF19B, FEM1B, NFX1	147	603	13528	2.13662	1	0.548014	19.6882
GOTERM_BP_FAT	GO:0006351~transcription, DNA-dependent	9	4.56853	0.0139182	RREB1, CREB1, CCNT1, MNT, GTF2H3, NFIC, LCOR, IVNS1ABP, NFX1	147	292	13528	2.83646	1	0.541085	20.2127
GOTERM_BP_FAT	GO:0043067~regulation of programmed cell death	17	8.62944	0.014267	DLC1, YWHAZ, XIAP, SGK3, CREB1, YWHAB, TNFSF15, FEM1B, YWHAE, GCLM, JMY, BFAR, VDR, NUP62, SQSTM1, MNT, DYRK2	147	812	13528	1.92668	1	0.533385	20.6661
GOTERM_BP_FAT	GO:0032870~cellular response to hormone stimulus	6	3.04569	0.0145976	NUP62, CCND2, GNAS, SIK2, STAT3, LATS2	147	133	13528	4.1516	1	0.5258	21.0937
GOTERM_BP_FAT	GO:0051301~cell division	9	4.56853	0.0147208	CCND1, CCND2, DSN1, CCNT1, CDK6, PAPD5, HMGA2, SEPT7, LATS2	147	295	13528	2.80761	1	0.513794	21.2525
GOTERM_BP_FAT	GO:0010941~regulation of cell death	17	8.62944	0.0147295	DLC1, YWHAZ, XIAP, SGK3, CREB1, YWHAB, TNFSF15, FEM1B, YWHAE, GCLM, JMY, BFAR, VDR, NUP62, SQSTM1, MNT, DYRK2	147	815	13528	1.91959	1	0.499771	21.2637
GOTERM_BP_FAT	GO:0032774~RNA biosynthetic process	9	4.56853	0.0149957	RREB1, CREB1, CCNT1, MNT, GTF2H3, NFIC, LCOR, IVNS1ABP, NFX1	147	296	13528	2.79812	1	0.492458	21.6058
GOTERM_BP_FAT	GO:0010558~negative regulation of macromolecule biosynthetic process	13	6.59898	0.015362	ZNF281, CTBP2, YWHAB, STAT3, VDR, POU2F1, GATAD2A, MDM2, LCOR, NFIC, TNRC6A, KDM5B, NFX1	147	547	13528	2.18712	1	0.487848	22.0741
GOTERM_BP_FAT	GO:0051174~regulation of phosphorus metabolic process	12	6.09137	0.0160023	DLC1, ACVR2B, CCND1, NUP62, ADORA2B, CCND2, MAP3K2, CCNT1, YWHAB, TNFSF15, YWHAE, LATS2	147	485	13528	2.27696	1	0.489491	22.8865
GOTERM_BP_FAT	GO:0019220~regulation of phosphate metabolic process	12	6.09137	0.0160023	DLC1, ACVR2B, CCND1, NUP62, ADORA2B, CCND2, MAP3K2, CCNT1, YWHAB, TNFSF15, YWHAE, LATS2	147	485	13528	2.27696	1	0.489491	22.8865
GOTERM_BP_FAT	GO:0031327~negative regulation of cellular biosynthetic process	13	6.59898	0.018367	ZNF281, CTBP2, YWHAB, STAT3, VDR, POU2F1, GATAD2A, MDM2, LCOR, NFIC, TNRC6A, KDM5B, NFX1	147	561	13528	2.13254	1	0.525733	25.8184
GOTERM_BP_FAT	GO:0033554~cellular response to stress	13	6.59898	0.0195411	MICA, XIAP, ADORA2B, USP1, GTF2H3, JMY, UBE2N, CCND1, MAP3K2, COL4A3BP, DYRK2, POLQ, TNRC6A	147	566	13528	2.1137	1	0.535908	27.2349
GOTERM_BP_FAT	GO:0000079~regulation of cyclin-dependent protein kinase activity	4	2.03046	0.0204569	CCND1, CCND2, CCNT1, LATS2	147	54	13528	6.81683	1	0.540718	28.3223
GOTERM_BP_FAT	GO:0051318~G1 phase	3	1.52284	0.0212413	MDM2, CDK6, ZNF655	147	21	13528	13.1467	1	0.542962	29.2414
GOTERM_BP_FAT	GO:0009890~negative regulation of biosynthetic process	13	6.59898	0.0212783	ZNF281, CTBP2, YWHAB, STAT3, VDR, POU2F1, GATAD2A, MDM2, LCOR, NFIC, TNRC6A, KDM5B, NFX1	147	573	13528	2.08788	1	0.532613	29.2845
GOTERM_BP_FAT	GO:0009057~macromolecule catabolic process	16	8.12183	0.0214715	XIAP, UBE4A, USP1, UBE2G2, GTF2H3, SOCS5, FEM1B, UBE2N, ARIH1, UFM1, SQSTM1, MDM2, YME1L1, USP35, RNF19B, NFX1	147	781	13528	1.88532	1	0.525269	29.5091
GOTERM_BP_FAT	GO:0045934~negative regulation of nucleobase, nucleoside, nucleotide and nucleic acid metabolic process	12	6.09137	0.0228686	ZNF281, VDR, CTBP2, YWHAB, GATAD2A, POU2F1, MDM2, NFIC, LCOR, KDM5B, STAT3, NFX1	147	512	13528	2.15689	1	0.537616	31.1132
GOTERM_BP_FAT	GO:0044265~cellular macromolecule catabolic process	15	7.61421	0.0249163	XIAP, UBE4A, USP1, UBE2G2, GTF2H3, SOCS5, FEM1B, UBE2N, ARIH1, UFM1, SQSTM1, MDM2, USP35, RNF19B, NFX1	147	725	13528	1.90401	1	0.558659	33.4024
GOTERM_BP_FAT	GO:0051172~negative regulation of nitrogen compound metabolic process	12	6.09137	0.0249575	ZNF281, VDR, CTBP2, YWHAB, GATAD2A, POU2F1, MDM2, NFIC, LCOR, KDM5B, STAT3, NFX1	147	519	13528	2.1278	1	0.549395	33.4477
GOTERM_BP_FAT	GO:0051329~interphase of mitotic cell cycle	5	2.53807	0.025304	CCND1, CCND2, MDM2, CDK6, LATS2	147	103	13528	4.46734	1	0.544838	33.8278
GOTERM_BP_FAT	GO:0051726~regulation of cell cycle	9	4.56853	0.0271484	CCND1, CCND2, BTG3, CCNT1, MNT, MDM2, CDK6, ZNF655, LATS2	147	331	13528	2.50225	1	0.561149	35.8165
GOTERM_BP_FAT	GO:0010605~negative regulation of macromolecule metabolic process	15	7.61421	0.0273125	ZNF281, CTBP2, YWHAB, YWHAE, STAT3, VDR, POU2F1, GATAD2A, MDM2, CELF1, LCOR, NFIC, TNRC6A, KDM5B, NFX1	147	734	13528	1.88067	1	0.554218	35.9906
GOTERM_BP_FAT	GO:0007242~intracellular signaling cascade	22	11.1675	0.0286296	RAB9A, ADORA2B, RREB1, YWHAB, TNFSF15, FHL2, SHOC2, SOCS5, YWHAE, LATS2, STAT3, VDR, CCND1, NUP62, MAP3K2, PDE7A, SQSTM1, GNAS, DYRK2, SIK2, PMEPA1, PLCXD1	147	1256	13528	1.61194	1	0.562548	37.3728
GOTERM_BP_FAT	GO:0035303~regulation of dephosphorylation	3	1.52284	0.0317436	DLC1, YWHAB, YWHAE	147	26	13528	10.6185	1	0.591932	40.5301
GOTERM_BP_FAT	GO:0035305~negative regulation of dephosphorylation	2	1.01523	0.0320315	YWHAB, YWHAE	147	3	13528	61.3515	1	0.586685	40.8143
GOTERM_BP_FAT	GO:0035308~negative regulation of protein amino acid dephosphorylation	2	1.01523	0.0320315	YWHAB, YWHAE	147	3	13528	61.3515	1	0.586685	40.8143
GOTERM_BP_FAT	GO:0032268~regulation of cellular protein metabolic process	11	5.58376	0.0327042	UBE2N, DLC1, CCND1, CCND2, MAP3K2, YWHAB, MDM2, PUM2, FEM1B, YWHAE, TNRC6A	147	474	13528	2.13565	1	0.586007	41.4736
GOTERM_BP_FAT	GO:0045859~regulation of protein kinase activity	9	4.56853	0.0335272	ACVR2B, CCND1, NUP62, ADORA2B, CCND2, MAP3K2, CCNT1, TNFSF15, LATS2	147	345	13528	2.40071	1	0.587031	42.2707
GOTERM_BP_FAT	GO:0022403~cell cycle phase	10	5.07614	0.0355051	CCND1, CCND2, DSN1, MDM2, CDK6, PAPD5, ZNF655, HMGA2, SEPT7, LATS2	147	414	13528	2.22288	1	0.600335	44.1449
GOTERM_BP_FAT	GO:0015031~protein transport	15	7.61421	0.0358642	COPA, YWHAZ, SYNRG, RAB9A, RTP4, AP4E1, MYO1C, YWHAB, YWHAE, LONP2, NUP62, AP3D1, YIPF5, GNAS, RAB11FIP1	147	762	13528	1.81156	1	0.596211	44.479
GOTERM_BP_FAT	GO:0045184~establishment of protein localization	15	7.61421	0.0382762	COPA, YWHAZ, SYNRG, RAB9A, RTP4, AP4E1, MYO1C, YWHAB, YWHAE, LONP2, NUP62, AP3D1, YIPF5, GNAS, RAB11FIP1	147	769	13528	1.79507	1	0.612821	46.6749
GOTERM_BP_FAT	GO:0043549~regulation of kinase activity	9	4.56853	0.0397535	ACVR2B, CCND1, NUP62, ADORA2B, CCND2, MAP3K2, CCNT1, TNFSF15, LATS2	147	357	13528	2.32001	1	0.619441	47.9794
GOTERM_BP_FAT	GO:0031399~regulation of protein modification process	8	4.06091	0.0408907	UBE2N, DLC1, CCND1, CCND2, MAP3K2, YWHAB, FEM1B, YWHAE	147	295	13528	2.49565	1	0.6226	48.9631
GOTERM_BP_FAT	GO:0006366~transcription from RNA polymerase II promoter	7	3.5533	0.0413614	RREB1, CCNT1, MNT, GTF2H3, NFIC, LCOR, NFX1	147	234	13528	2.75295	1	0.619617	49.3651
GOTERM_BP_FAT	GO:0000278~mitotic cell cycle	9	4.56853	0.0473259	CCND1, CCND2, DSN1, MDM2, CDK6, PAPD5, HMGA2, SEPT7, LATS2	147	370	13528	2.2385	1	0.663129	54.2088
GOTERM_BP_FAT	GO:0006511~ubiquitin-dependent protein catabolic process	7	3.5533	0.0473569	ARIH1, UBE4A, SQSTM1, USP1, UBE2G2, MDM2, USP35	147	242	13528	2.66194	1	0.656389	54.2329
GOTERM_BP_FAT	GO:0051338~regulation of transferase activity	9	4.56853	0.0485692	ACVR2B, CCND1, NUP62, ADORA2B, CCND2, MAP3K2, CCNT1, TNFSF15, LATS2	147	372	13528	2.22646	1	0.659037	55.1622
GOTERM_BP_FAT	GO:0006974~response to DNA damage stimulus	9	4.56853	0.0491989	UBE2N, CCND1, MICA, XIAP, USP1, GTF2H3, DYRK2, POLQ, JMY	147	373	13528	2.2205	1	0.657151	55.6379
GOTERM_BP_FAT	GO:0006886~intracellular protein transport	9	4.56853	0.0498338	COPA, SYNRG, YWHAZ, LONP2, RTP4, AP4E1, YWHAB, AP3D1, YWHAE	147	374	13528	2.21456	1	0.655365	56.1127
GOTERM_BP_FAT	GO:0046907~intracellular transport	13	6.59898	0.0519946	COPA, SYNRG, YWHAZ, LONP2, RTP4, AP4E1, SQSTM1, YWHAB, AP3D1, MLXIP, GNAS, ERGIC1, YWHAE	147	657	13528	1.82093	1	0.664856	57.6934
GOTERM_BP_FAT	GO:0006325~chromatin organization	9	4.56853	0.0524268	UBE2N, CHD9, SETD1B, NAP1L1, INO80, JMJD1C, HMGA2, KDM5B, MPHOSPH8	147	378	13528	2.19112	1	0.661598	58.003
GOTERM_BP_FAT	GO:0008104~protein localization	16	8.12183	0.0535096	COPA, YWHAZ, SYNRG, RAB9A, RTP4, MYO1C, AP4E1, YWHAB, YWHAE, LONP2, NUP62, SQSTM1, AP3D1, YIPF5, GNAS, RAB11FIP1	147	882	13528	1.66943	1	0.663034	58.7695
GOTERM_BP_FAT	GO:0000122~negative regulation of transcription from RNA polymerase II promoter	7	3.5533	0.068448	ZNF281, VDR, MDM2, NFIC, LCOR, STAT3, NFX1	147	266	13528	2.42177	1	0.748187	68.0914
GOTERM_BP_FAT	GO:0034613~cellular protein localization	9	4.56853	0.0771415	COPA, SYNRG, YWHAZ, LONP2, RTP4, AP4E1, YWHAB, AP3D1, YWHAE	147	411	13528	2.01519	1	0.784725	72.5649
GOTERM_BP_FAT	GO:0045667~regulation of osteoblast differentiation	3	1.52284	0.0784021	ACVR2B, CDK6, GNAS	147	43	13528	6.4205	1	0.78493	73.1625
GOTERM_BP_FAT	GO:0010604~positive regulation of macromolecule metabolic process	15	7.61421	0.0791256	DLC1, CREB1, FHL2, STAT3, UBE2N, CCND1, NUP62, REL, CCND2, SQSTM1, POU2F1, MDM2, DYRK2, NFIC, SERTAD2	147	857	13528	1.61074	1	0.782802	73.4999
GOTERM_BP_FAT	GO:0070727~cellular macromolecule localization	9	4.56853	0.0796861	COPA, SYNRG, YWHAZ, LONP2, RTP4, AP4E1, YWHAB, AP3D1, YWHAE	147	414	13528	2.00059	1	0.780014	73.7586
GOTERM_BP_FAT	GO:0045737~positive regulation of cyclin-dependent protein kinase activity	2	1.01523	0.0831683	CCND1, CCND2	147	8	13528	23.0068	1	0.789644	75.3132
GOTERM_BP_FAT	GO:0042493~response to drug	6	3.04569	0.0847383	CCND1, YWHAZ, CREB1, GNAS, GCLM, STAT3	147	216	13528	2.55631	1	0.791046	75.9856
GOTERM_BP_FAT	GO:0022402~cell cycle process	11	5.58376	0.0852104	CCND1, CCND2, DSN1, MDM2, CDK6, PAPD5, ZNF655, HMGA2, SEPT7, LATS2, JMY	147	565	13528	1.79168	1	0.788019	76.1844
GOTERM_BP_FAT	GO:0008380~RNA splicing	7	3.5533	0.0873461	PRPF4B, NUDT21, ESRP1, CELF1, IVNS1ABP, PRPF4, LUC7L3	147	284	13528	2.26828	1	0.791655	77.0645
GOTERM_BP_FAT	GO:0008219~cell death	13	6.59898	0.0884091	DLC1, MFSD8, MICA, XIAP, YWHAB, TNFSF15, FEM1B, YWHAE, BFAR, NUP62, SQSTM1, DYRK2, LUC7L3	147	719	13528	1.66391	1	0.791024	77.4911
GOTERM_BP_FAT	GO:0010033~response to organic substance	13	6.59898	0.0897969	CREB1, FHL2, LATS2, STAT3, ACVR2B, CCND1, THBD, LONP2, TFRC, NUP62, CCND2, GNAS, SIK2	147	721	13528	1.6593	1	0.791658	78.0368
GOTERM_BP_FAT	GO:0016265~death	13	6.59898	0.091904	DLC1, MFSD8, MICA, XIAP, YWHAB, TNFSF15, FEM1B, YWHAE, BFAR, NUP62, SQSTM1, DYRK2, LUC7L3	147	724	13528	1.65242	1	0.794965	78.8418
GOTERM_BP_FAT	GO:0046580~negative regulation of Ras protein signal transduction	2	1.01523	0.093069	DLC1, NUP62	147	9	13528	20.4505	1	0.794719	79.2749
GOTERM_BP_FAT	GO:0051058~negative regulation of small GTPase mediated signal transduction	2	1.01523	0.093069	DLC1, NUP62	147	9	13528	20.4505	1	0.794719	79.2749
GOTERM_BP_FAT	GO:0045860~positive regulation of protein kinase activity	6	3.04569	0.0939425	ACVR2B, CCND1, ADORA2B, CCND2, MAP3K2, TNFSF15	147	223	13528	2.47607	1	0.793424	79.5942
GOTERM_BP_FAT	GO:0006357~regulation of transcription from RNA polymerase II promoter	13	6.59898	0.0940416	ZNF281, CREB1, FHL2, STAT3, JMY, CIAO1, VDR, SQSTM1, POU2F1, MDM2, LCOR, NFIC, NFX1	147	727	13528	1.6456	1	0.789338	79.6301
GOTERM_BP_FAT	GO:0008285~negative regulation of cell proliferation	8	4.06091	0.0961782	DLC1, VDR, CTBP2, NUP62, BTG3, MNT, TNFSF15, CDK6	147	361	13528	2.03938	1	0.792676	80.3904
GOTERM_BP_FAT	GO:0006259~DNA metabolic process	10	5.07614	0.0971621	UBE2N, USP1, RRM2, NAP1L1, GATAD2A, GTF2H3, PAPD5, POLQ, NFIC, JMY	147	506	13528	1.81872	1	0.79185	80.7315
